# Supplementary material
Source: Research Square preprint supplement (doi:10.21203/rs.3.rs-9123982/v1)
Supplement: Supplementary file 1 [file 8d809b2a68def8efab578146.xlsx]

## Sheet: Table of Contents
TABLE OF CONTENTS
Data & Analysis Workbook: Developing Physical Input-Output Tables using Model D (Conventional) and ByPASS (Proposed) Approaches
Sheet Name	Description	Data Size	Category
T1. EPA CDR Production Data	EPA Chemical Data Reporting - Comprehensive production volumes, site locations, chemical identifiers, industrial processes, and worker exposure data for US manufactured/imported chemicals	36,255 × 77	Raw Data
T2. EPA TRI Waste Data	EPA Toxic Release Inventory - Facility-level releases to air, water, land; waste management quantities; RSEI hazard scores; source reduction activities	78,305 × 19	Raw Data
T3. Imports - Trade Shift Comp.	U.S. import data by sector and HTS8 codes - Trade values 2015-2019 for general imports and imports for consumption across sectors	11,503 × 19	Raw Data
T4. Exports - Trade Shift Comp.	U.S. export data by sector and HTS8 codes - Trade values 2015-2019 for total exports and domestic exports across sectors	10,906 × 19	Raw Data
T5. BEA IOUse Data - FC Values	Bureau of Economic Analysis Input-Output Use Table (2017) - Inter-industry commodity flows in millions of dollars	406 × 427	Raw Data
T6. Imports to APAP	Import quantities converted to mass (kg) for APAP supply chain - Maps HTS codes to commodities with USD/kg conversion factors	100 × 6	Trade Data
T7. Exports and FC from APAP	Export quantities and final consumption in kg - Outbound trade flows and domestic consumption for acetaminophen production chain	100 × 7	Trade Data
T8. Production Facility Data	Chemical production facility locations - Site coordinates and 2019 domestic production volumes for propene, propanol, acetone, etc.	499 × 4	ByPASS Data
T9. Prod. Facility Centroids	Geographic centroids for production industries - Calculated average lat/long coordinates representing industry cluster centers	17 × 3	ByPASS Data
T10. Disposal Facility Data	Treatment, Storage & Disposal Facilities (TSDF) - Location data for waste management facilities including military and industrial sites	1,010 × 3	ByPASS Data
T11. Transportation Distance	Inter-facility transportation distances - Calculated distances in miles between production centroids and disposal facilities	273 × 8	ByPASS Data
T12. ByPASS Economics Data	Chemical pricing and logistics costs - Market prices (USD/kg), handling/storage costs, transport rates, disposal gate fees with sources	37 × 5	ByPASS Data
T13. Base Op Loss (Lambda Base)	Operational loss factors by commodity class - Base loss rates for storage/handling across volatility categories with EPA references	12 × 4	ByPASS Data
T14. Sectoral Intensity (Kappa)	Industry containment multipliers - Sector-specific adjustment factors for loss rates based on NAICS codes and containment operations	11 × 4	ByPASS Data
T15. ByPASS Calculations	Byproduct Assessment System calculations - Computes saleable vs. waste byproduct quantities using engineering factors and economic gate analysis	7 × 27	ByPASS Data
T16. Partial PUT Model D (Ind)	Partial Product Use Table by Industry - Commodity inputs to each industry process (APAP, Acetone, Benzene, etc.) before balancing	100 × 17	Model D (Ind)
T17. Partial PST Model D (Ind)	Partial Product Supply Table by Industry - Commodity outputs from each industry process before balancing adjustments	100 × 17	Model D (Ind)
T18. Complete PUT Model D (Ind)	Complete Product Use Table by Industry - Balanced commodity inputs including ROE, Exports, and Final Demand columns	104 × 20	Model D (Ind)
T19. Complete PST Model D (Ind)	Complete Product Supply Table by Industry - Balanced commodity outputs with ROE allocation for inter-industry flows	104 × 18	Model D (Ind)
T20. PIOT Model D (Ind)	Physical Input-Output Table by Industry - Symmetric industry-by-industry flow matrix with waste column and supply totals	22 × 23	Model D (Ind)
T21. Partial PUT ByPASS (Ind)	Partial Use Table with ByPASS adjustments - Industry-level inputs incorporating byproduct valorization pathways	110 × 17	ByPASS (Ind)
T22. Partial PST ByPASS (Ind)	Partial Supply Table with ByPASS adjustments - Industry-level outputs with byproduct streams separated	110 × 17	ByPASS (Ind)
T23. Complete PUT ByPASS (Ind)	Complete Use Table with ByPASS - Balanced inputs with byproduct waste streams and merchantable quantities	112 × 20	ByPASS (Ind)
T24. Complete PST ByPASS (Ind)	Complete Supply Table with ByPASS - Balanced outputs showing byproduct recovery and waste streams	112 × 18	ByPASS (Ind)
T25. PIOT ByPASS (Ind)	Physical Input-Output Table with ByPASS - Symmetric matrix reflecting circular economy byproduct flows	22 × 23	ByPASS (Ind)
T26. Industry Mapping to NAICS	Industry to NAICS code crosswalk - Maps model industry abbreviations to official Census NAICS codes with descriptions	24 × 4	Reference
T27. Partial PUT Model D (Sec)	Partial Use Table by NAICS Sector - Commodity inputs aggregated to NAICS sector level (325199, 325311, etc.)	100 × 9	Model D (Sec)
T28. Partial PST Model D (Sec)	Partial Supply Table by NAICS Sector - Commodity outputs aggregated to NAICS sector level	100 × 9	Model D (Sec)
T29. Complete PUT Model D (Sec)	Complete Use Table by NAICS Sector - Balanced sector-level inputs with ROE, Exports, and Final Demand	104 × 12	Model D (Sec)
T30. Complete PST Model D (Sec)	Complete Supply Table by NAICS Sector - Balanced sector-level outputs with ROE allocation	104 × 10	Model D (Sec)
T31. PIOT Model D (Sec)	Physical Input-Output Table by NAICS Sector - Sector-by-sector symmetric flow matrix with imports and slack rows	12 × 13	Model D (Sec)
T32. Partial PUT ByPASS (Sec)	Partial Use Table ByPASS by Sector - Sector-level inputs with byproduct valorization adjustments	110 × 9	ByPASS (Sec)
T33. Partial PST ByPASS (Sec)	Partial Supply Table ByPASS by Sector - Sector-level outputs with byproduct stream separation	110 × 9	ByPASS (Sec)
T34. Complete PUT ByPASS (Sec)	Complete Use Table ByPASS by Sector - Balanced sector inputs incorporating circular byproduct flows	112 × 12	ByPASS (Sec)
T35. Complete PST ByPASS (Sec)	Complete Supply Table ByPASS by Sector - Balanced sector outputs with byproduct recovery accounting	112 × 10	ByPASS (Sec)
T36. PIOT ByPASS (Sec)	Physical Input-Output Table ByPASS by Sector - Sector-level symmetric matrix with circular economy adjustments	12 × 13	ByPASS (Sec)
T37. MFA Indicators	Material Flow Analysis Indicators - Economy-wide metrics (DE, DMI, DMC, DPO, NAS, PTB) and tiered breakdown of material flows	87 × 21	MFA Results
CATEGORY LEGEND
Raw Data	EPA, BEA, and Trade source datasets	Model D (Ind)	Industry-level Physical IO Tables
Trade Data	Import/Export quantity conversions	ByPASS (Ind)	Industry-level with byproduct flows
ByPASS Data	Pricing, costs, loss factors, sectoral intensity, and ByPASS Calculations	Model D (Sec)	NAICS sector-level Physical IO Tables
Reference	NAICS code mapping tables	ByPASS (Sec)	Sector-level with byproduct flows
MFA Results	Material Flow Analysis indicators
WORKBOOK STATISTICS
Total Sheets:	38
Data Categories:	9
Methodological Types:	2 (Model D and ByPASS)
Geographic Scope:	United States
KEY ABBREVIATIONS
PUT	Physical Use Table (inputs by industry)	PIOT	Physical Input-Output Table
PST	Physical Supply Table (outputs by industry)	ROE	Rest of Economy
ByPASS	Byproduct Aware Sales Share	MFA	Material Flow Analysis
APAP	Acetaminophen (Paracetamol)	NAICS	North American Industry Classification
EPA CDR	Environmental Protection Agency Chemical Data Reporting	TRI	Toxic Release Inventory
TSDF	Treatment, Storage & Disposal Facility	HTS-8	Harmonized Tariff Schedule (8-digit)
Last Updated:	March 12, 2026 at 20:00

## Sheet: T1. EPA CDR Production Data
CHEMICAL NAME	SITE LATITUDE	SITE LONGITUDE	CHEMICAL REPORT ID	CHEMICAL ID	CHEMICAL ID W/O DASHES	CHEMICAL ID TYPE	DOMESTIC PARENT COMPANY NAME	DOMESTIC PC ADDRESS LINE1	DOMESTIC PC ADDRESS LINE2	DOMESTIC PC CITY	DOMESTIC PC COUNTY / PARISH	DOMESTIC PC STATE	DOMESTIC PC POSTAL CODE	DOMESTIC PC DUN & BRADSTREET NUMBER	FOREIGN PARENT COMPANY NAME	FOREIGN PC ADDRESS LINE1	FOREIGN PC ADDRESS LINE2	FOREIGN PC CITY	FOREIGN PC COUNTY / PARISH	FOREIGN PC POSTAL CODE	FOREIGN PC COUNTRY CODE	FOREIGN PC DUN & BRADSTREET NUMBER	SITE NAME	SITE ADDRESS LINE1	SITE ADDRESS LINE2	SITE CITY	SITE COUNTY / PARISH	SITE STATE	SITE POSTAL CODE	SITE DUN & BRADSTREET NUMBER	EPA-TSCA PROGRAM ID	EPA FACILITY REGISTRY ID	SITE NAICS CODE 1	SITE NAICS ACTIVITY 1	SITE NAICS CODE 2	SITE NAICS ACTIVITY 2	SITE NAICS CODE 3	SITE NAICS ACTIVITY 3	ACTIVITY	2019 DOMESTIC PV	2019 IMPORT PV	2019 PV	2018 PV	2017 PV	2016 PV	2019 NATIONALLY AGGREGATED PV	2018 NATIONALLY AGGREGATED PV	2017 NATIONALLY AGGREGATED PV	2016 NATIONALLY AGGREGATED PV
(Polyisobutenyl)dihydro-2,5-furandione esters with polyhydroxylalkane	38.3153	-85.6729	704950	18849	18849	Accession Number	IDEMITSU LUBRICANTS AMERICA	701 PORT RD		JEFFERSONVILLE	Clark	IN	47130	08-463-1498									IDEMITSU LUBRICANTS AMERICA	701 PORT ROAD		JEFFERSONVILLE	CLARK	IN	47130-8425	78-575-0373	100603800	110001000000	324191 Petroleum Lubricating Oil And Grease Manufacturing	Import					Import	0	26564	26564	27056	10321	11988	100,000 ‚Äì <500,000	1,000,000 ‚Äì <10,000,000	500,000 ‚Äì <1,000,000	1,000,000 ‚Äì <20,000,000
.alpha.-Cyclodextrin	41.1318	-92.6427	720823	10016-20-3	10016203	CASRN	WACKER CHEMICAL CORPORATION	3301 SUTTON ROAD		ADRIAN	Lenawee	MI	49221-9397	07-540-0671	WACKER CHEMIE AG	Hanns-Seidel-Platz 4		Mnchen		81737	GM	31-609-7161	WACKER BIOSOLUTIONS CORPORATION	1 WACKER DRIVE		EDDYVILLE	MONROE COUNTY	IA	52553-7765	02-365-8151	TSCA7186	110002000000	311221 Wet Corn Milling	Withheld	424690 Other Chemical And Allied Products Merchant Wholesalers	Withheld			CBI	CBI	CBI	CBI	CBI	CBI	CBI	<1,000,000	<1,000,000	<1,000,000	<1,000,000
.alpha.-Cyclodextrin, 2-hydroxypropyl ethers	41.1318	-92.6427	720826	128446-33-3	128446333	CASRN	WACKER CHEMICAL CORPORATION	3301 SUTTON ROAD		ADRIAN	Lenawee	MI	49221-9397	07-540-0671	WACKER CHEMIE AG	Hanns-Seidel-Platz 4		Mnchen		81737	GM	31-609-7161	WACKER BIOSOLUTIONS CORPORATION	1 WACKER DRIVE		EDDYVILLE	MONROE COUNTY	IA	52553-7765	02-365-8151	TSCA7186	110002000000	311221 Wet Corn Milling	Both	424690 Other Chemical And Allied Products Merchant Wholesalers	Import				CBI	0	CBI	CBI	CBI	CBI	<1,000,000	<1,000,000	<1,000,000	<1,000,000
.alpha.-D-Glucopyranoside, .beta.-D-fructofuranosyl	30.0492	-90.684	704564	57-50-1	57501	CASRN	Louisiana Sugar Refining	P.O. Box 625	1230 South Fifth Avenue	Gramercy	St.James	LA	70052	00-498-7925									CARGILL LOUISIANA SUGAR REFINING (LSR) LLC	1230 5TH AVE		GRAMERCY	ST. JAMES PARISH	LA	70052	00-498-7925	TSCA123520	110070000000	111930 Sugarcane Farming	Manufacture					Manufacture	2074294	0	2074294	1541960	2099661	982152	1,000,000 ‚Äì <10,000,000	1,000,000 ‚Äì <10,000,000	1,000,000 ‚Äì <10,000,000	1,000,000 ‚Äì <10,000,000
.alpha.-D-Glucopyranoside, .beta.-D-fructofuranosyl	30.0497	-90.6842	701668	57-50-1	57501	CASRN	CARGILL, INC	15407 MCGINTY ROAD WEST	MS 62	WAYZATA	Hennepin	MN	55391	00-624-9189									LOUISIANA SUGAR REFINING	1230 S 5TH AVE		GRAMERCY	ST. JAMES PARISH	LA	70052	00-498-7925	TSCA9002	110000000000	311221 Wet Corn Milling	Manufacture					Manufacture	CBI	0	CBI	CBI	CBI	CBI	1,000,000 ‚Äì <10,000,000	1,000,000 ‚Äì <10,000,000	1,000,000 ‚Äì <10,000,000	1,000,000 ‚Äì <10,000,000
.alpha.-D-Glucopyranoside, .beta.-D-fructofuranosyl	30.1604	-95.4559	701505	57-50-1	57501	CASRN	HUNTSMAN INTERNATIONAL LLC	10003 Woodloch Forest Dr		THE WOODLANDS	Montgomery	TX	77380	96-864-2079									HUNTSMAN CORPORATION - THE WOODLANDS CORPORATE SITE	10003 WOODLOCH FOREST DR.		THE WOODLANDS	MONTGOMERY	TX	77380	96-864-2079	100606419	110036000000	325199 All Other Basic Organic Chemical Manufacturing	Withheld					CBI	CBI	CBI	CBI	CBI	CBI	CBI	1,000,000 ‚Äì <10,000,000	1,000,000 ‚Äì <10,000,000	1,000,000 ‚Äì <10,000,000	1,000,000 ‚Äì <10,000,000
.alpha.-D-Glucopyranoside, .beta.-D-fructofuranosyl	39.9628	-82.9958	739268	57-50-1	57501	CASRN	Hexion Holdings Corp	180 E Broad St		Columbus	Franklin	OH	43215	11-733-1984									HEXION INC.	180 EAST BROAD ST		COLUMBUS	FRANKLIN COUNTY	OH	43215	00-133-8797	TSCA123204	110070000000	325998 All Other Miscellaneous Chemical Product And Preparation Manufacturing	Import					Import	CBI	CBI	CBI	CBI	CBI	CBI	1,000,000 ‚Äì <10,000,000	1,000,000 ‚Äì <10,000,000	1,000,000 ‚Äì <10,000,000	1,000,000 ‚Äì <10,000,000
.alpha.-D-Glucopyranoside, .beta.-D-fructofuranosyl	41.9365	-71.1293	703449	57-50-1	57501	CASRN	EMD Holding Corp	One Technology Place		Rockland	Plymounth	MA	2370	96-370-9014									EMD MILLIPORE CORP	530 JOHN HANCOCK RD	SUITE 100	TAUNTON	BRISTOL	MA	2780	07-878-4283	TSCA10058214	110045000000	325180 Other Basic Inorganic Chemical Manufacturing	Import	325414 Biological Product (Except Diagnostic) Manufacturing	Import	325199 All Other Basic Organic Chemical Manufacturing	Import	Import	CBI	CBI	CBI	CBI	CBI	CBI	1,000,000 ‚Äì <10,000,000	1,000,000 ‚Äì <10,000,000	1,000,000 ‚Äì <10,000,000	1,000,000 ‚Äì <10,000,000
.alpha.-D-Glucopyranoside, .beta.-D-fructofuranosyl	45.0331	-93.0942	708780	57-50-1	57501	CASRN	3M COMPANY	3M CENTER, BUILDING 220-6E-03		ST. PAUL	Ramsey	MN	55144	00-617-3082									3M COMPANY	3M CENTER		ST PAUL	RAMSEY	MN	55144-1000	00-617-3082	100604318	110036000000	322220 Paper Bag And Coated And Treated Paper Manufacturing	Import	326113 Unlaminated Plastics Film And Sheet (Except Packaging) Manufacturing	Import	325520 Adhesive Manufacturing	Import	Import	CBI	CBI	CBI	CBI	CBI	CBI	1,000,000 ‚Äì <10,000,000	1,000,000 ‚Äì <10,000,000	1,000,000 ‚Äì <10,000,000	1,000,000 ‚Äì <10,000,000
.alpha.-D-Glucopyranoside, .beta.-D-fructofuranosyl, benzoate	36.0402	-79.7786	717463	12738-64-6	12738646	CASRN	LANXESS CORPORATION	111 RIDC PARK WEST DRIVE		PITTSBURGH	Allegheny	PA	15275	14-585-8770	LANXESS DEUTSCHLAND GMBH	Kennedyplatz 1		Koln		50569	GM	31-546-4482	LANXESS CORPORATION GREENSBORO	520 BROOME RD.		GREENSBORO	GUILFORD COUNTY	NC	27406-3799	06-179-5696	100608461	110000000000	325199 All Other Basic Organic Chemical Manufacturing	Manufacture						0	0	0	0	34780	102241	<1,000,000	100,000 ‚Äì <500,000	100,000 ‚Äì <500,000	100,000 ‚Äì <500,000
.alpha.-D-Glucopyranoside, .beta.-D-fructofuranosyl, benzoate	40.0217	-75.6593	716701	12738-64-6	12738646	CASRN	MIWON NORTH AMERICA, INC.	Suite 104, 100 Arrandale Blvd.		EXTON	Chester	PA	19341	06-972-7540	MIWON HOLDINGS CO LTD	20 Poeun-daero 59 beon-gil, Suji-gu,		Yongin-si		16864	KS	63-113-1752	MIWON NORTH AMERICA	SUITE 104, 100 ARRANDALE BLVD		EXTON	CHESTER COUNTY	PA	19341	06-972-7540	TSCA101661	110067000000	325199 All Other Basic Organic Chemical Manufacturing	Import					Import	CBI	CBI	CBI	CBI	CBI	CBI	<1,000,000	100,000 ‚Äì <500,000	100,000 ‚Äì <500,000	100,000 ‚Äì <500,000
.alpha.-D-Glucopyranoside, .beta.-D-fructofuranosyl, benzoate	41.7764	-88.2238	704367	12738-64-6	12738646	CASRN	RAHN USA CORP.	1005 N COMMONS DRIVE		AURORA	Du Page	IL	60504	09-250-2595	RAHN AG	Doerflistrasse 120		Zurich	Switzerland	8050	SZ	40-850-5387	RAHN USA CORP	1005 N COMMONS DR		AURORA	DUPAGE COUNTY	IL	60504	09-250-2595	100600898	110021000000	424690 Other Chemical And Allied Products Merchant Wholesalers	Import					Import	CBI	CBI	CBI	CBI	CBI	CBI	<1,000,000	100,000 ‚Äì <500,000	100,000 ‚Äì <500,000	100,000 ‚Äì <500,000
.alpha.-D-Glucopyranoside, .beta.-D-fructofuranosyl, benzoate	42.9099	-85.6111	729566	12738-64-6	12738646	CASRN	Aalborz Chemical LLC	2240 29th Street SE		Grand Rapids	Kent	MI	49508	11-707-3796									AALBORZ CHEMICAL LLC	2240 29TH ST SE		GRAND RAPIDS	KENT COUNTY	MI	49508	11-707-3796	TSCA10022610	110070000000	424690 Other Chemical And Allied Products Merchant Wholesalers	Import					Import	0	56867	56867	218213	158700	79358	<1,000,000	100,000 ‚Äì <500,000	100,000 ‚Äì <500,000	100,000 ‚Äì <500,000
.alpha.-D-Glucopyranoside, .beta.-D-fructofuranosyl, diacetate hexakis(2-methylpropanoate)	36.5359	-82.5493	722461	27216-37-1	27216371	CASRN	EASTMAN CHEMICAL COMPANY, INC	200 SOUTH WILCOX DRIVE		KINGSPORT	Sullivan	TN	37660-5147	80-889-8381									EASTMAN CHEMICAL CO. B-280 OFF	200 SOUTH WILCOX DRIVE		KINGSPORT	SULLIVAN	TN	37660-5147	80-889-8381	TSCA4101	110057000000	325998 All Other Miscellaneous Chemical Product And Preparation Manufacturing	Withheld					CBI	CBI	CBI	CBI	CBI	CBI	CBI	1,000,000 ‚Äì <20,000,000	1,000,000 ‚Äì <20,000,000	1,000,000 ‚Äì <20,000,000	1,000,000 ‚Äì <20,000,000
.alpha.-D-Glucopyranoside, 2-ethylhexyl	41.8798	-87.6294	724761	125590-73-0	125590730	CASRN	NOURYON SURFACE CHEMISTRY LLC	131 S. DEARBORN ST	SUITE 1000	CHICAGO	Cook	IL	60603	83-304-4659									NOURYON SURFACE CHEMISTRY LLC	131 S DEARBORN ST	SUITE 1000	CHICAGO	COOK COUNTY	IL	60603	83-304-4659	TSCA10044281	110071000000	325199 All Other Basic Organic Chemical Manufacturing	Import					Import	CBI	CBI	CBI	CBI	CBI	CBI	<1,000,000	<1,000,000	<1,000,000	<1,000,000
.beta.-Alanine, N-(2-carboxyethyl)-N-(2-ethylhexyl)-, sodium salt (1:1)	27.9459	-82.4581	728391	94441-92-6	94441926	CASRN	Yara North America	100 North Tampa Street	Suite 3200	Tampa	Hillsborough	FL	33602	79-516-3518									YARA NORTH AMERICA-CORPORATE OFFICE	100 NORTH TAMPA STREET, SUITE 3200		TAMPA		FL	33602	79-516-3518	100600138	110057000000	424910 Farm Supplies Merchant Wholesalers	Import					Import	0	7	7	45	35	2	500,000 ‚Äì <1,000,000	500,000 ‚Äì <1,000,000	500,000 ‚Äì <1,000,000	500,000 ‚Äì <1,000,000
.beta.-Alanine, N-(2-carboxyethyl)-N-(2-ethylhexyl)-, sodium salt (1:1)	34.1403	-84.8472	718276	94441-92-6	94441926	CASRN	INNOVATIVE CHEMICAL TECHNOLOGIES, INC.	680 Douthit Ferry Road Suite 201, Cartersville, GA 30120		Cartersville	BARTOW	GA	30120	11-277-7541									INNOVATIVE CHEMICAL TECHNOLOGIES INC	8 RIVERSIDE DRIVE		CARTERSVILLE	BARTOW COUNTY	GA	30120	11-757-5484	TSCA10054149	110013000000	325199 All Other Basic Organic Chemical Manufacturing	Withheld					CBI	CBI	CBI	CBI	CBI	CBI	CBI	500,000 ‚Äì <1,000,000	500,000 ‚Äì <1,000,000	500,000 ‚Äì <1,000,000	500,000 ‚Äì <1,000,000
.beta.-Alanine, N-(2-carboxyethyl)-N-(2-ethylhexyl)-, sodium salt (1:1)	40.8835	-74.2936	707679	94441-92-6	94441926	CASRN	Delta Carbona, L.P.	376 Hollywood Ave	Suite 208	Fairfield	Essex	NJ	7004	13-377-7208									DELTA CARBONA, L.P.	376 HOLLYWOOD AVE	SUITE 208	FAIRFIELD	ESSEX COUNTY	NJ	7004	13-377-7208	TSCA10060819	110071000000	325611 Soap And Other Detergent Manufacturing	Import					Import	0	4787	4787	114615	1677	1040	500,000 ‚Äì <1,000,000	500,000 ‚Äì <1,000,000	500,000 ‚Äì <1,000,000	500,000 ‚Äì <1,000,000
.beta.-Alanine, N-(2-carboxyethyl)-N-(2-ethylhexyl)-, sodium salt (1:1)	42.7794	-88.967	706568	94441-92-6	94441926	CASRN	Evonik Corporation	299 Jefferson Rd		Parsippany	Morris	NJ	7054	79-153-3958									EVONIK CORPORATION	337 VINCENT ST		MILTON	ROCK COUNTY	WI	53563	82-707-5685	TSCA10005466	110070000000	325613 Surface Active Agent Manufacturing						Manufacture	CBI	0	CBI	CBI	CBI	CBI	500,000 ‚Äì <1,000,000	500,000 ‚Äì <1,000,000	500,000 ‚Äì <1,000,000	500,000 ‚Äì <1,000,000
.beta.-Alanine, N-(2-carboxyethyl)-N-[3-(decyloxy)propyl]-, sodium salt (1:1)	42.7794	-88.967	706547	64972-19-6	64972196	CASRN	Evonik Corporation	299 Jefferson Rd		Parsippany	Morris	NJ	7054	79-153-3958									EVONIK CORPORATION	337 VINCENT ST		MILTON	ROCK COUNTY	WI	53563	82-707-5685	TSCA10005466	110070000000	325613 Surface Active Agent Manufacturing						Manufacture	CBI	0	CBI	CBI	CBI	CBI	<1,000,000	<1,000,000	<1,000,000	<1,000,000
.beta.-Alanine, N-(2-carboxyethyl)-N-[3-(octyloxy)propyl]-, sodium salt (1:1)	42.7794	-88.967	706546	64972-18-5	64972185	CASRN	Evonik Corporation	299 Jefferson Rd		Parsippany	Morris	NJ	7054	79-153-3958									EVONIK CORPORATION	337 VINCENT ST		MILTON	ROCK COUNTY	WI	53563	82-707-5685	TSCA10005466	110070000000	325613 Surface Active Agent Manufacturing						Manufacture	CBI	0	CBI	CBI	CBI	CBI	<1,000,000	<1,000,000	<1,000,000	<1,000,000
.beta.-Alanine, N-(2-carboxyethyl)-N-[3-[(2-carboxyethyl)amino]propyl]-, N-[(isoalkyloxy)propyl]derivs. (PROVISIONAL)	42.7794	-88.967	706527	177550	177550	Accession Number	Evonik Corporation	299 Jefferson Rd		Parsippany	Morris	NJ	7054	79-153-3958									EVONIK CORPORATION	337 VINCENT ST		MILTON	ROCK COUNTY	WI	53563	82-707-5685	TSCA10005466	110070000000	325613 Surface Active Agent Manufacturing						CBI	CBI	CBI	CBI	CBI	CBI	CBI	<1,000,000	<1,000,000	<1,000,000	<1,000,000
.beta.-Alanine, N-(2-carboxyethyl)-N-dodecyl-, sodium salt (1:1)	34.1403	-84.8472	718265	14960-06-6	14960066	CASRN	INNOVATIVE CHEMICAL TECHNOLOGIES, INC.	680 Douthit Ferry Road Suite 201, Cartersville, GA 30120		Cartersville	BARTOW	GA	30120	11-277-7541									INNOVATIVE CHEMICAL TECHNOLOGIES INC	8 RIVERSIDE DRIVE		CARTERSVILLE	BARTOW COUNTY	GA	30120	11-757-5484	TSCA10054149	110013000000	325199 All Other Basic Organic Chemical Manufacturing	Withheld					CBI	CBI	CBI	CBI	CBI	CBI	CBI	500,000 ‚Äì <1,000,000	500,000 ‚Äì <1,000,000	500,000 ‚Äì <1,000,000	500,000 ‚Äì <1,000,000
.beta.-Alanine, N-(2-carboxyethyl)-N-dodecyl-, sodium salt (1:1)	34.799	-84.9495	735679	14960-06-6	14960066	CASRN	Textile Rubber & Chemical CO	1400 TIARCO DR		DALTON	Whitfield	GA	30721	00-102-3621									TIARCO RST	1010 VISTA DR		DALTON	WHITFIELD COUNTY	GA	30721	12-693-3714	TSCA10057576	110071000000	325199 All Other Basic Organic Chemical Manufacturing	Manufacture					Manufacture	219587	0	219587	217582	254458	189269	500,000 ‚Äì <1,000,000	500,000 ‚Äì <1,000,000	500,000 ‚Äì <1,000,000	500,000 ‚Äì <1,000,000
.beta.-Alanine, N-(2-carboxyethyl)-N-dodecyl-, sodium salt (1:1)	34.9966	-85.6438	713498	14960-06-6	14960066	CASRN	COLONIAL CHEMICAL, INC	225 COLONIAL DRIVE		SOUTH PITTSBURG	Marion	TN	37380	01-435-7557									COLONIAL CHEMICAL INC.	225 COLONIAL DR		SOUTH PITTSBURG	MARION COUNTY	TN	37380	01-435-7557	TSCA10061699	110036000000	325199 All Other Basic Organic Chemical Manufacturing	Manufacture	325613 Surface Active Agent Manufacturing	Manufacture			Manufacture	130171	0	130171	56762	35688	12193	500,000 ‚Äì <1,000,000	500,000 ‚Äì <1,000,000	500,000 ‚Äì <1,000,000	500,000 ‚Äì <1,000,000
.beta.-Alanine, N-(2-carboxyethyl)-N-dodecyl-, sodium salt (1:1)	36.7774	-76.5432	703968	14960-06-6	14960066	CASRN	BASF Corp	100 Park Ave		Florham Park	Morris	NJ	7932	00-130-7032	BASF SE	Carl-Bosch-Str-38		Ludwigshafen		67056	GM	31-500-0554	BASF CORP	2301 WILROY RD		SUFFOLK	SUFFOLK CITY	VA	234390820	83-098-1341	TSCA7465	110021000000	325613 Surface Active Agent Manufacturing	Manufacture						0	0	0	CBI	0	0	500,000 ‚Äì <1,000,000	500,000 ‚Äì <1,000,000	500,000 ‚Äì <1,000,000	500,000 ‚Äì <1,000,000
.beta.-Alanine, N-(2-carboxyethyl)-N-dodecyl-, sodium salt (1:1)	36.7777	-76.5413	711113	14960-06-6	14960066	CASRN	Solenis LLC	2475 Pinnacle Dr		Wilmington	New Castle	DE	19803	07-943-6434									SOLENIS LLC	2301 WILROY RD		SUFFOLK	SUFFOLK CITY	VA	23434	03-490-4295	200000253	110036000000	325199 All Other Basic Organic Chemical Manufacturing							CBI	0	CBI	0	0	0	500,000 ‚Äì <1,000,000	500,000 ‚Äì <1,000,000	500,000 ‚Äì <1,000,000	500,000 ‚Äì <1,000,000
.beta.-Alanine, N-(2-carboxyethyl)-N-dodecyl-, sodium salt (1:1)	39.2359	-76.5782	722758	14960-06-6	14960066	CASRN	Solvay Holding Inc	504 Carnegie Center		Princeton	Mercer	NJ	8540	87-474-8937	SOLVAY SA	RUE DE RANSBEEK, 310	1120 Brussels	Brussels			BE	37-000-9086	RHODIA INC	3440 FAIRFIELD ROAD		BALTIMORE	BALTIMORE	MD	21226-1512	60-838-0580	100607739	110001000000	325199 All Other Basic Organic Chemical Manufacturing						Manufacture	CBI	0	CBI	CBI	CBI	CBI	500,000 ‚Äì <1,000,000	500,000 ‚Äì <1,000,000	500,000 ‚Äì <1,000,000	500,000 ‚Äì <1,000,000
.beta.-Cyclodextrin	41.1318	-92.6427	720830	7585-39-9	7585399	CASRN	WACKER CHEMICAL CORPORATION	3301 SUTTON ROAD		ADRIAN	Lenawee	MI	49221-9397	07-540-0671	WACKER CHEMIE AG	Hanns-Seidel-Platz 4		Mnchen		81737	GM	31-609-7161	WACKER BIOSOLUTIONS CORPORATION	1 WACKER DRIVE		EDDYVILLE	MONROE COUNTY	IA	52553-7765	02-365-8151	TSCA7186	110002000000	311221 Wet Corn Milling	Withheld	424690 Other Chemical And Allied Products Merchant Wholesalers	Withheld			CBI	CBI	CBI	CBI	CBI	CBI	CBI	1,000,000 ‚Äì <20,000,000	1,000,000 ‚Äì <20,000,000	1,000,000 ‚Äì <20,000,000	1,000,000 ‚Äì <20,000,000
.beta.-Cyclodextrin, 2-hydroxypropyl ethers	40.7521	-75.2384	737714	128446-35-5	128446355	CASRN	HALLMARK CARDS	2501 McGee Trafficway		KANSAS CITY	JACKSON	MO	64108	00-713-1113									CRAYOLA LLC CHURCH LN PLT	1100 CHURCH LANE		EASTON	NORTHAMPTON COUNTY	PA	18040-6638	00-137-4909	TSCA8606	110000000000	339942 Lead Pencil And Art Good Manufacturing	Both					Import	0	131805	131805	358605	196605	296494	1,000,000 ‚Äì <10,000,000	1,000,000 ‚Äì <10,000,000	1,000,000 ‚Äì <10,000,000	1,000,000 ‚Äì <10,000,000
.beta.-Cyclodextrin, 2-hydroxypropyl ethers	41.1318	-92.6427	720827	128446-35-5	128446355	CASRN	WACKER CHEMICAL CORPORATION	3301 SUTTON ROAD		ADRIAN	Lenawee	MI	49221-9397	07-540-0671	WACKER CHEMIE AG	Hanns-Seidel-Platz 4		Mnchen		81737	GM	31-609-7161	WACKER BIOSOLUTIONS CORPORATION	1 WACKER DRIVE		EDDYVILLE	MONROE COUNTY	IA	52553-7765	02-365-8151	TSCA7186	110002000000	311221 Wet Corn Milling	Withheld	424690 Other Chemical And Allied Products Merchant Wholesalers	Withheld			CBI	CBI	CBI	CBI	CBI	CBI	CBI	1,000,000 ‚Äì <10,000,000	1,000,000 ‚Äì <10,000,000	1,000,000 ‚Äì <10,000,000	1,000,000 ‚Äì <10,000,000
.beta.-Cyclodextrin, methyl ethers	41.1318	-92.6427	720828	128446-36-6	128446366	CASRN	WACKER CHEMICAL CORPORATION	3301 SUTTON ROAD		ADRIAN	Lenawee	MI	49221-9397	07-540-0671	WACKER CHEMIE AG	Hanns-Seidel-Platz 4		Mnchen		81737	GM	31-609-7161	WACKER BIOSOLUTIONS CORPORATION	1 WACKER DRIVE		EDDYVILLE	MONROE COUNTY	IA	52553-7765	02-365-8151	TSCA7186	110002000000	311221 Wet Corn Milling	Withheld	424690 Other Chemical And Allied Products Merchant Wholesalers	Withheld			CBI	CBI	CBI	CBI	CBI	CBI	CBI	<1,000,000	<1,000,000	<1,000,000	<1,000,000
1(3H)-Isobenzofuranone, 3,3-bis[4-hydroxy-2-methyl-5-(1-methylethyl)phenyl]-	38.4215	-81.844	723287	125-20-2	125202	CASRN	United Color Manufacturing	Suite 205	Suite 205	Newtown	Bucks	PA	18940	17-727-6482									UNITED COLOR, MANUFACTURING	150 PLANT RD		NITRO	KANAWHA COUNTY	WV	25143	15-377-7644	TSCA10044004	110071000000	325132 Synthetic Organic Dye And Pigment Manufacturing	Both					Manufacture	CBI	CBI	CBI	CBI	CBI	CBI	<1,000,000	<1,000,000	<1,000,000	<1,000,000
1(3H)-Isobenzofuranone, 6-(dimethylamino)-3,3-bis[4-(dimethylamino)phenyl]-	41.0298	-73.774	706588	1552-42-7	1552427	CASRN	Marubeni America Corporation	375 Lexington Ave.		New York	New York	NY	10017	00-167-0876									MARUBENI SPECIALTY CHEMICALS INC.	10 BANK ST	SUITE 740	WHITE PLAINS	WESTCHESTER COUNTY	NY	10606	78-727-6633	TSCA4463	110005000000	424690 Other Chemical And Allied Products Merchant Wholesalers	Import					Import	0	122355	122355	388010	182982	23148	<1,000,000	<1,000,000	<1,000,000	<1,000,000
1,1'-Biphenyl	30.1837	-93.3279	727304	92-52-4	92524	CASRN	CITGO Holding, Inc.	1293 Eldridge Parkway		Houston	Harris	TX	77077	85-870-6773									CITGO PETROLEUM CORP - LAKE CHARLES MANUFACTURING COMPLEX	1601 HIGHWAY 108 EAST		SULPHUR	CALCASIEU PARISH	LA	70665	10-241-7268	TSCA6750	110001000000	324110 Petroleum Refineries	Both					Manufacture	0	0	0	0	230285	0	1,000,000 ‚Äì <20,000,000	1,000,000 ‚Äì <20,000,000	1,000,000 ‚Äì <20,000,000	1,000,000 ‚Äì <20,000,000
1,1'-Biphenyl	33.6501	-85.8547	700933	92-52-4	92524	CASRN	EASTMAN CHEMICAL COMPANY, INC	200 SOUTH WILCOX DRIVE		KINGSPORT	Sullivan	TN	37660-5147	80-889-8381									SOLUTIA INC ANNISTON PLANT	702 CLYDESDALE AVENUE		ANNISTON	CALHOUN	AL	36201-5328	01-114-8363	TSCA9425	110000000000	325199 All Other Basic Organic Chemical Manufacturing	Withheld	325998 All Other Miscellaneous Chemical Product And Preparation Manufacturing	Withheld			CBI	CBI	CBI	CBI	CBI	CBI	CBI	1,000,000 ‚Äì <20,000,000	1,000,000 ‚Äì <20,000,000	1,000,000 ‚Äì <20,000,000	1,000,000 ‚Äì <20,000,000
1,1'-Biphenyl	34.7796	-84.808	733323	92-52-4	92524	CASRN	CBI	CBI	CBI	CBI	CBI	CBI	CBI	CBI	CBI	CBI	CBI	CBI	CBI	CBI	CBI	CBI	PREMIER POLYMERS	234 LOWY DR		CHATSWORTH	MURRAY COUNTY	GA	30705	78-245-1186	TSCA124313	110070000000	325998 All Other Miscellaneous Chemical Product And Preparation Manufacturing	Both					Import	0	30800	30800	30800	61600	30800	1,000,000 ‚Äì <20,000,000	1,000,000 ‚Äì <20,000,000	1,000,000 ‚Äì <20,000,000	1,000,000 ‚Äì <20,000,000
1,1'-Biphenyl	40.7734	-74.4261	727153	92-52-4	92524	CASRN	BASF Corporation	100 Park Avenue		Florham Park	NJ	MI	7932	00-130-7032	BASF SE	Carl-Bosch Strasse 38		Ludwigshafen		60756	GM	31-500-0554	BASF IMPORTS PART 1	100 PARK AVE		FLORHAM PARK	MORRIS COUNTY	NJ	7932	00-130-7032	TSCA130148	110070000000	325199 All Other Basic Organic Chemical Manufacturing	Import						0	0	0	0	CBI	CBI	1,000,000 ‚Äì <20,000,000	1,000,000 ‚Äì <20,000,000	1,000,000 ‚Äì <20,000,000	1,000,000 ‚Äì <20,000,000
1,1'-Biphenyl, bis(1-methylethyl)-	29.6089	-95.0534	738403	69009-90-1	69009901	CASRN	JX Nippon Chemical Texas Inc.	10500 Bay Area Blvd.		Pasadena	Harris County	TX	77507	62-514-1825									JX NIPPON CHEMICAL TEXAS INC.	10500 BAY AREA BLVD		PASADENA	HARRIS	TX	77507	62-514-1825	TSCA82162	110000000000	325110 Petrochemical Manufacturing	Both	325998 All Other Miscellaneous Chemical Product And Preparation Manufacturing	Both			Manufacture	1755900	0	1755900	2151000	757800	1122300	1755900	2151000	757800	1122300
1,1'-Biphenyl, tris(1-methylethyl)-	29.6089	-95.0534	738395	29225-91-0	29225910	CASRN	JX Nippon Chemical Texas Inc.	10500 Bay Area Blvd.		Pasadena	Harris County	TX	77507	62-514-1825									JX NIPPON CHEMICAL TEXAS INC.	10500 BAY AREA BLVD		PASADENA	HARRIS	TX	77507	62-514-1825	TSCA82162	110000000000	325110 Petrochemical Manufacturing	Both	325998 All Other Miscellaneous Chemical Product And Preparation Manufacturing	Both			Manufacture	97550	0	97550	119500	42100	62350	97550	119500	42100	62350
1,1':2',1''-Terphenyl	33.6501	-85.8547	700931	84-15-1	84151	CASRN	EASTMAN CHEMICAL COMPANY, INC	200 SOUTH WILCOX DRIVE		KINGSPORT	Sullivan	TN	37660-5147	80-889-8381									SOLUTIA INC ANNISTON PLANT	702 CLYDESDALE AVENUE		ANNISTON	CALHOUN	AL	36201-5328	01-114-8363	TSCA9425	110000000000	325199 All Other Basic Organic Chemical Manufacturing	Withheld	325998 All Other Miscellaneous Chemical Product And Preparation Manufacturing	Withheld			CBI	CBI	CBI	CBI	CBI	CBI	CBI	<1,000,000	<1,000,000	<1,000,000	<1,000,000
1,1':3',1''-Terphenyl	33.6501	-85.8547	700932	92-06-8	92068	CASRN	EASTMAN CHEMICAL COMPANY, INC	200 SOUTH WILCOX DRIVE		KINGSPORT	Sullivan	TN	37660-5147	80-889-8381									SOLUTIA INC ANNISTON PLANT	702 CLYDESDALE AVENUE		ANNISTON	CALHOUN	AL	36201-5328	01-114-8363	TSCA9425	110000000000	325199 All Other Basic Organic Chemical Manufacturing	Withheld	325998 All Other Miscellaneous Chemical Product And Preparation Manufacturing	Withheld			CBI	CBI	CBI	CBI	CBI	CBI	CBI	<1,000,000	<1,000,000	<1,000,000	<1,000,000
1,1,2,2,3,3,4,4,4-Nonafluoro-N,N-bis(2-hydroxyethyl)butane-1-sulphonamide	34.6417	-87.0386	724067	34455-00-0	34455000	CASRN	3M COMPANY	3M CENTER	Bldg. 236-1B-10	ST. PAUL	Ramsey	MN	55144-1000	00-617-3082									3M COMPANY	1400 STATE DOCKS RD.		DECATUR	MORGAN	AL	35601-8807	84-811-9926	TSCA5941	110000000000	325199 All Other Basic Organic Chemical Manufacturing	Withheld					CBI	CBI	CBI	CBI	CBI	CBI	CBI	<1,000,000	<1,000,000	<1,000,000	<1,000,000
1,1-Cyclopropanedicarboxylic acid, 1,1-dimethyl ester	38.6707	-90.3986	734848	6914-71-2	6914712	CASRN	Bayer US Holding LP	100 Bayer Blvd		Whippany	Morris	NJ	7981	11-779-8237	BAYER AG	Kaiser-Wilhelm-Allee 1		Leverkusen		51373	GM	31-503-4629	BAYER CROPSCIENCE LP	800 N LINDBERGH BLVD		SAINT LOUIS	ST. LOUIS COUNTY	MO	63141	11-703-1168	TSCA10056924	110071000000	325320 Pesticide And Other Agricultural Chemical Manufacturing	Import	541710 Research And Development In The Physical, Engineering, And Life Sciences	Import			Import	CBI	CBI	CBI	CBI	CBI	CBI	<1,000,000	<1,000,000	<1,000,000	<1,000,000
1,1-Ethanediol, 1,1-diacetate	28.859	-95.951	706909	542-10-9	542109	CASRN	CELANESE	222 W. Las Colinas Blvd.	Suite 900N	Irving	Dallas	TX	75039	17-020-4486									CELANESE LTD BAY CITY PLANT	HIGHWAY 3057 10 MILES SOUTHWEST OF BAY CITY		BAY CITY	MATAGORDA	TX	77414	02-422-3467	TSCA6782	110001000000	325199 All Other Basic Organic Chemical Manufacturing	Withheld					CBI	CBI	CBI	CBI	CBI	CBI	CBI	<1,000,000	<1,000,000	<1,000,000	<1,000,000
1,10-Decanediol	40.0976	-75.4059	715268	112-47-0	112470	CASRN	Arkema Delaware Inc.	900 FIRST AVENUE	Bldg 10	KING OF PRUSSIA	Montgomery	PA	19406	00-229-0773	ARKEMA	420 rue d'Estienne d'Orves		Colombes	Cedex	92705	FR	26-840-1833	ARKEMA CHEM RESEARCH & DEV LAB MAG	900 FIRST AVENUE		KING OF PRUSSIA	MONTGOMERY	PA	19406-1308	00-229-0773	TSCA4903	110001000000	541712 Research And Development In The Physical, Engineering, And Life Sciences (Except Biotechnology)	Import									CBI	CBI	CBI	0	<1,000,000	<1,000,000	<1,000,000
1,10-Phenanthroline	36.6464	-88.3008	712143	66-71-7	66717	CASRN	R. T. Vanderbilt Holding Co., Inc.	30 WINFIELD STREET	P.O. BOX 5150	NORWALK	Fairfield	CT	06856-5150	07-870-9973									VANDERBILT CHEMICALS, LLC	396 PELLA WAY		MURRAY	CALLOWAY COUNTY	KY	42071	05-335-0229	100607808	110000000000	325180 Other Basic Inorganic Chemical Manufacturing	Manufacture	327999 All Other Miscellaneous Nonmetallic Mineral Product Manufacturing	Manufacture	325998 All Other Miscellaneous Chemical Product And Preparation Manufacturing	Manufacture	Manufacture	CBI	0	CBI	CBI	CBI	CBI	<1,000,000	<1,000,000	<1,000,000	<1,000,000
1,12-Dodecanediol	40.0976	-75.4059	715323	5675-51-4	5675514	CASRN	Arkema Delaware Inc.	900 FIRST AVENUE	Bldg 10	KING OF PRUSSIA	Montgomery	PA	19406	00-229-0773	ARKEMA	420 rue d'Estienne d'Orves		Colombes	Cedex	92705	FR	26-840-1833	ARKEMA CHEM RESEARCH & DEV LAB MAG	900 FIRST AVENUE		KING OF PRUSSIA	MONTGOMERY	PA	19406-1308	00-229-0773	TSCA4903	110001000000	541712 Research And Development In The Physical, Engineering, And Life Sciences (Except Biotechnology)	Import					Import	CBI	CBI	CBI	CBI	CBI	CBI	<1,000,000	<1,000,000	<1,000,000	<1,000,000
1,2,3,4-Butanetetracarboxylic acid, 1,2,3,4-tetrakis(1,2,2,6,6-pentamethyl-4-piperidinyl) ester	29.7556	-95.3627	713653	91788-83-9	91788839	CASRN	Mitsubishi Corporation (Americas)	655 Third Avenue		New York	New York	NY	10017	07-834-6382									MITSUBISHI INTERNATIONAL POLYMERTRADE CORPORATION	1221 MCKINNEY ST	SUITE 3500	HOUSTON	HARRIS COUNTY	TX	77010	80-701-9070	TSCA123001	110070000000	424690 Other Chemical And Allied Products Merchant Wholesalers						Import	0	228472	228472	471943	537464	524364	228472	471943	537464	524364
1,2,3,4-Butanetetracarboxylic acid, 1,2,3,4-tetrakis(2,2,6,6-tetramethyl-4-piperidinyl) ester	29.7556	-95.3627	713639	64022-61-3	64022613	CASRN	Mitsubishi Corporation (Americas)	655 Third Avenue		New York	New York	NY	10017	07-834-6382									MITSUBISHI INTERNATIONAL POLYMERTRADE CORPORATION	1221 MCKINNEY ST	SUITE 3500	HOUSTON	HARRIS COUNTY	TX	77010	80-701-9070	TSCA123001	110070000000	424690 Other Chemical And Allied Products Merchant Wholesalers						Import	0	39462	39462	50265	43717	40476	39462	50265	43717	40476
1,2,3,4-Butanetetrol, (2R,3S)-rel-	43.0975	-88.0606	722066	149-32-6	149326	CASRN	BRENNTAG GREAT LAKES, LLC	P.O. BOX 444		BUTLER	Milwaukee	WI	53007	04-245-4228	BRENNTAG AG	Messeallee 11		Essen		45131	GM	50-709-1739	BRENNTAG GREAT LAKES, LLC - WAUWATOSA WAREHOUSE	4420 N HARLEY DAVIDSON AVE		WAUWATOSA	MILWAUKEE COUNTY	WI	53226	04-245-4228	100601681	110019000000	424690 Other Chemical And Allied Products Merchant Wholesalers	Import					Import	0	83774	83774	0	0	0	83774	0	0	0
1,2,3-Benzothiadiazole-7-carboxylic acid	40.6953	-78.2299	733397	35272-27-6	35272276	CASRN	ALBEMARLE CORP	4350 Congress Street	Suite 700	Charlotte	Mecklenberg	NC	28209	82-508-0096									ALBEMARLE CORP TYRONE SITE	2858 BACK VAIL ROAD		TYRONE	BLAIR COUNTY	PA	16686	03-078-3091	100604521	110046000000	325199 All Other Basic Organic Chemical Manufacturing	Both						CBI	0	CBI	CBI	CBI	CBI	<1,000,000	<1,000,000	<1,000,000	<1,000,000
1,2,3-Oxathiazin-4(3H)-one, 6-methyl-, 2,2-dioxide, potassium salt	43.0975	-88.0606	722080	55589-62-3	55589623	CASRN	BRENNTAG GREAT LAKES, LLC	P.O. BOX 444		BUTLER	Milwaukee	WI	53007	04-245-4228	BRENNTAG AG	Messeallee 11		Essen		45131	GM	50-709-1739	BRENNTAG GREAT LAKES, LLC - WAUWATOSA WAREHOUSE	4420 N HARLEY DAVIDSON AVE		WAUWATOSA	MILWAUKEE COUNTY	WI	53226	04-245-4228	100601681	110019000000	424690 Other Chemical And Allied Products Merchant Wholesalers	Import					Import	0	39683	39683	39683	41667	0	39683	39683	41667	0
1,2,3-Propanetricarboxylic acid, 2-(1-oxobutoxy)-, 1,2,3-trihexyl ester	36.0599	-79.8285	718213	82469-79-2	82469792	CASRN	VERTELLUS LLC	201 NORTH ILLINOIS STREET	Suite 1800	INDIANAPOLIS	Marion	IN	46204	07-934-5010									VERTELLUS GREENSBORO LLC	2110 HIGH POINT RD.		GREENSBORO	GUILFORD COUNTY	NC	27403	08-048-4759	TSCA9666	110000000000	325199 All Other Basic Organic Chemical Manufacturing	Both					Manufacture	CBI	CBI	CBI	CBI	CBI	CBI	1,000,000 ‚Äì <20,000,000	1,000,000 ‚Äì <20,000,000	1,000,000 ‚Äì <20,000,000	<1,000,000
1,2,3-Propanetricarboxylic acid, 2-(acetyloxy)-, 1,2,3-tributyl ester	36.0402	-79.7786	717473	77-90-7	77907	CASRN	LANXESS CORPORATION	111 RIDC PARK WEST DRIVE		PITTSBURGH	Allegheny	PA	15275	14-585-8770	LANXESS DEUTSCHLAND GMBH	Kennedyplatz 1		Koln		50569	GM	31-546-4482	LANXESS CORPORATION GREENSBORO	520 BROOME RD.		GREENSBORO	GUILFORD COUNTY	NC	27406-3799	06-179-5696	100608461	110000000000	325199 All Other Basic Organic Chemical Manufacturing	Manufacture					Manufacture	309991	0	309991	178854	177339	171199	1,000,000 ‚Äì <10,000,000	1,000,000 ‚Äì <10,000,000	1,000,000 ‚Äì <10,000,000	1,000,000 ‚Äì <10,000,000
1,2,3-Propanetricarboxylic acid, 2-(acetyloxy)-, 1,2,3-tributyl ester	36.0599	-79.8285	718207	77-90-7	77907	CASRN	VERTELLUS LLC	201 NORTH ILLINOIS STREET	Suite 1800	INDIANAPOLIS	Marion	IN	46204	07-934-5010									VERTELLUS GREENSBORO LLC	2110 HIGH POINT RD.		GREENSBORO	GUILFORD COUNTY	NC	27403	08-048-4759	TSCA9666	110000000000	325199 All Other Basic Organic Chemical Manufacturing	Both					Both	CBI	CBI	CBI	CBI	CBI	CBI	1,000,000 ‚Äì <10,000,000	1,000,000 ‚Äì <10,000,000	1,000,000 ‚Äì <10,000,000	1,000,000 ‚Äì <10,000,000
1,2,3-Propanetricarboxylic acid, 2-(acetyloxy)-, 1,2,3-tributyl ester	40.7734	-74.4261	727082	77-90-7	77907	CASRN	BASF Corporation	100 Park Avenue		Florham Park	NJ	MI	7932	00-130-7032	BASF SE	Carl-Bosch Strasse 38		Ludwigshafen		60756	GM	31-500-0554	BASF IMPORTS PART 1	100 PARK AVE		FLORHAM PARK	MORRIS COUNTY	NJ	7932	00-130-7032	TSCA130148	110070000000	325199 All Other Basic Organic Chemical Manufacturing	Import					Import	CBI	CBI	CBI	CBI	CBI	CBI	1,000,000 ‚Äì <10,000,000	1,000,000 ‚Äì <10,000,000	1,000,000 ‚Äì <10,000,000	1,000,000 ‚Äì <10,000,000
1,2,3-Propanetricarboxylic acid, 2-(acetyloxy)-, 1,2,3-tributyl ester	41.494	-71.3762	726337	77-90-7	77907	CASRN	The Chemical Company	44 Southwest Avenue		Jamestown	Newport	RI	2835	15-362-2584									THE CHEMICAL COMPANY	44 SOUTHWEST AVE	PO BOX 436	JAMESTOWN	NEWPORT COUNTY	RI	2835	15-362-2584	TSCA108221	110068000000	424690 Other Chemical And Allied Products Merchant Wholesalers	Import					Import	CBI	CBI	CBI	CBI	CBI	CBI	1,000,000 ‚Äì <10,000,000	1,000,000 ‚Äì <10,000,000	1,000,000 ‚Äì <10,000,000	1,000,000 ‚Äì <10,000,000
1,2,3-Propanetricarboxylic acid, 2-(acetyloxy)-, 1,2,3-tributyl ester	41.8855	-71.3637	736792	77-90-7	77907	CASRN	TEKNOR APEX CO	505 CENTRAL AVE		PAWTUCKET	Providence	RI	2861	04-536-7968									TEKNOR APEX CO	505 CENTRAL AVENUE		PAWTUCKET	PROVIDENCE	RI	02861-1900	04-536-7968	100603114	110000000000	325991 Custom Compounding Of Purchased Resins	Import					Import	CBI	CBI	CBI	CBI	CBI	CBI	1,000,000 ‚Äì <10,000,000	1,000,000 ‚Äì <10,000,000	1,000,000 ‚Äì <10,000,000	1,000,000 ‚Äì <10,000,000
1,2,3-Propanetricarboxylic acid, 2-(acetyloxy)-, 1,2,3-tributyl ester	42.2923	-71.1988	729732	77-90-7	77907	CASRN	JUNGBUNZLAUER INC	95 WELLS AVENUE	Suite 150	NEWTON	Middlesex	MA	2459	09-586-4101	JUNGBUNZLAUER HOLDING AG	St. Alban-Vorstadt 90		Basel		4002	SZ	48-236-6101	JUNGBUNZLAUER, INC.	95 WELLS AVENUE		NEWTON CENTRE	MIDDLESEX COUNTY	MA	02459-3261	09-586-4104	TSCA4614	110040000000	325199 All Other Basic Organic Chemical Manufacturing	Import					Import	0	1310150	1310150	1310282	1106180	1712357	1,000,000 ‚Äì <10,000,000	1,000,000 ‚Äì <10,000,000	1,000,000 ‚Äì <10,000,000	1,000,000 ‚Äì <10,000,000
1,2,3-Propanetricarboxylic acid, 2-(acetyloxy)-, 1,2,3-triethyl ester	36.0599	-79.8285	718206	77-89-4	77894	CASRN	VERTELLUS LLC	201 NORTH ILLINOIS STREET	Suite 1800	INDIANAPOLIS	Marion	IN	46204	07-934-5010									VERTELLUS GREENSBORO LLC	2110 HIGH POINT RD.		GREENSBORO	GUILFORD COUNTY	NC	27403	08-048-4759	TSCA9666	110000000000	325199 All Other Basic Organic Chemical Manufacturing	Both					Manufacture	CBI	CBI	CBI	CBI	CBI	CBI	<1,000,000	<1,000,000	<1,000,000	<1,000,000
1,2,3-Propanetricarboxylic acid, 2-(acetyloxy)-, 1,2,3-trihexyl ester	36.0599	-79.8285	718195	24817-92-3	24817923	CASRN	VERTELLUS LLC	201 NORTH ILLINOIS STREET	Suite 1800	INDIANAPOLIS	Marion	IN	46204	07-934-5010									VERTELLUS GREENSBORO LLC	2110 HIGH POINT RD.		GREENSBORO	GUILFORD COUNTY	NC	27403	08-048-4759	TSCA9666	110000000000	325199 All Other Basic Organic Chemical Manufacturing	Both					Manufacture	CBI	CBI	CBI	CBI	CBI	CBI	<1,000,000	<1,000,000	<1,000,000	<1,000,000
1,2,3-Propanetricarboxylic acid, 2-hydroxy-	25.7539	-80.2594	715761	77-92-9	77929	CASRN	Valagro USA Inc	2020 Ponce De Leon blvd	Suite 1203	Coral Gables	Miami-Dade	FL	33134	03-952-7069									VALAGRO USA, INC.	2020 PONCE DE LEON BLVD		MIAMI	MIAMI-DADE COUNTY	FL	33134	03-952-7069	TSCA10070659	110071000000	424910 Farm Supplies Merchant Wholesalers	Import					Import	CBI	CBI	CBI	CBI	CBI	CBI	100,000,000 ‚Äì <250,000,000	250,000,000 ‚Äì <500,000,000	250,000,000 ‚Äì <500,000,000	250,000,000 ‚Äì <500,000,000
1,2,3-Propanetricarboxylic acid, 2-hydroxy-	25.7893	-80.3551	707718	77-92-9	77929	CASRN	KG International	9800 NW 17th Street		Miami	Miami-Dade	FL	33172	10-195-1630									KG INTERNATIONAL	9800 NW 17TH ST		MIAMI	MIAMI-DADE COUNTY	FL	33172	10-195-1630	TSCA99782	110057000000	424690 Other Chemical And Allied Products Merchant Wholesalers	Import					Import	0	46305	46305	0	46305	215318	100,000,000 ‚Äì <250,000,000	250,000,000 ‚Äì <500,000,000	250,000,000 ‚Äì <500,000,000	250,000,000 ‚Äì <500,000,000
1,2,3-Propanetricarboxylic acid, 2-hydroxy-	26.7133	-80.0516	714910	77-92-9	77929	CASRN	GREENCHEM INDUSTRIES LLC	222 CLEMATIS STREET	Suite 207	WEST PALM BEACH	Palm Beach	FL	33401	80-577-2717									GREENCHEM	222 CLEMATIS ST	SUITE 207	WEST PALM BEACH	PALM BEACH COUNTY	FL	33401	80-577-2717	TSCA124127	110070000000	424690 Other Chemical And Allied Products Merchant Wholesalers						Import	CBI	CBI	CBI	CBI	CBI	CBI	100,000,000 ‚Äì <250,000,000	250,000,000 ‚Äì <500,000,000	250,000,000 ‚Äì <500,000,000	250,000,000 ‚Äì <500,000,000
1,2,3-Propanetricarboxylic acid, 2-hydroxy-	29.5734	-95.2959	713950	77-92-9	77929	CASRN	SOLVCHEM, INC.	4704 SHANK ROAD		PEARLAND	Brazoria	TX	77581	06-802-4652									SOLVENTS & CHEMICALS	4704 SHANK RD.		PEARLAND	BRAZORIA	TX	77581	06-802-4652	100608001	110000000000	424690 Other Chemical And Allied Products Merchant Wholesalers	Both					Import	0	83887	83887	83775	0	0	100,000,000 ‚Äì <250,000,000	250,000,000 ‚Äì <500,000,000	250,000,000 ‚Äì <500,000,000	250,000,000 ‚Äì <500,000,000
1,2,3-Propanetricarboxylic acid, 2-hydroxy-	29.6089	-95.0534	714762	77-92-9	77929	CASRN	Avantor Inc	Building One Suite 200	100 Matsonford Rd	Radnor	Delaware	PA	19087	08-098-8180									AVANTOR PERFORMANCE MATERIALS PARIS KY PLANT	7001 MARTIN LUTHER KING JR BLVD		PARIS	BOURBON	KY	40361	08-475-8069	TSCA78864	110057000000	325180 Other Basic Inorganic Chemical Manufacturing	Import	423490 Other Professional Equipment And Supplies Merchant Wholesalers	Import	334516 Analytical Laboratory Instrument Manufacturing	Import	Import	CBI	CBI	CBI	CBI	CBI	CBI	100,000,000 ‚Äì <250,000,000	250,000,000 ‚Äì <500,000,000	250,000,000 ‚Äì <500,000,000	250,000,000 ‚Äì <500,000,000
1,2,3-Propanetricarboxylic acid, 2-hydroxy-	29.6461	-95.0939	735322	77-92-9	77929	CASRN	HARCROS CHEMICALS	5200 SPEAKER ROAD		KANSAS CITY	Wyandotte	KS	66106	08-016-6983									HARCROS CHEMICALS INC	4606 NEW W DR		PASADENA	HARRIS COUNTY	TX	77507-1886	06-808-1033	TSCA6254	110021000000	424690 Other Chemical And Allied Products Merchant Wholesalers	Import									0	0	44100	100,000,000 ‚Äì <250,000,000	250,000,000 ‚Äì <500,000,000	250,000,000 ‚Äì <500,000,000	250,000,000 ‚Äì <500,000,000
1,2,3-Propanetricarboxylic acid, 2-hydroxy-	29.867	-95.5426	711807	77-92-9	77929	CASRN	ALEN USA, LLC	14825 Northwest Freeway, Suite 500		Houston	Harris	TX	77040	11-302-2235	INDUSTRIAS ALEN S A DE C V	Blvd. Diaz Ordaz No. 1000		Santa Catarina		66150	MX	81-139-3271	ALEN USA	14825 NORTHWEST FWY		HOUSTON	HARRIS COUNTY	TX	77040	11-302-2235	TSCA131341	110070000000	325611 Soap And Other Detergent Manufacturing	Import	325612 Polish And Other Sanitation Good Manufacturing	Import			Import	0	11089	11089	31719	14155	18405	100,000,000 ‚Äì <250,000,000	250,000,000 ‚Äì <500,000,000	250,000,000 ‚Äì <500,000,000	250,000,000 ‚Äì <500,000,000
1,2,3-Propanetricarboxylic acid, 2-hydroxy-	30.8451	-83.2473	731033	77-92-9	77929	CASRN	HARCROS CHEMICALS	5200 SPEAKER ROAD		KANSAS CITY	Lowndes	KS	66106	08-016-6983									HARCROS CHEMICALS INC - VALDOSTA	125 BLANCHARD ST		VALDOSTA	LOWNDES COUNTY	GA	31601	07-627-8851	TSCA10057220	110071000000	424690 Other Chemical And Allied Products Merchant Wholesalers	Import									41800	0	0	100,000,000 ‚Äì <250,000,000	250,000,000 ‚Äì <500,000,000	250,000,000 ‚Äì <500,000,000	250,000,000 ‚Äì <500,000,000
1,2,3-Propanetricarboxylic acid, 2-hydroxy-	32.2992	-90.9006	727511	77-92-9	77929	CASRN	HARCROS CHEMICALS	5200 SPEAKER ROAD		KANSAS CITY	Wyandotte	KS	66106	08-016-6983									HARCROS CHEMICALS INC	4280 RIFLE RANGE RD.		VICKSBURG	WARREN COUNTY	MS	39180	06-264-9470	TSCA5475	110000000000	424690 Other Chemical And Allied Products Merchant Wholesalers	Import					Import	0	1808100	1808100	1342845	615195	573300	100,000,000 ‚Äì <250,000,000	250,000,000 ‚Äì <500,000,000	250,000,000 ‚Äì <500,000,000	250,000,000 ‚Äì <500,000,000
1,2,3-Propanetricarboxylic acid, 2-hydroxy-	32.7761	-96.9031	724325	77-92-9	77929	CASRN	HARCROS CHEMICALS	5200 SPEAKER ROAD		KANSAS CITY	Wyandotte	KS	66106	08-016-6983									HARCROS CHEMICALS INC	2627 WEIR STREET		DALLAS	DALLAS COUNTY	TX	75212-4612	06-665-6265	100600789	110000000000	424690 Other Chemical And Allied Products Merchant Wholesalers	Import					Import	0	396090	396090	439950	88000	264000	100,000,000 ‚Äì <250,000,000	250,000,000 ‚Äì <500,000,000	250,000,000 ‚Äì <500,000,000	250,000,000 ‚Äì <500,000,000
1,2,3-Propanetricarboxylic acid, 2-hydroxy-	33.0458	-117.284	719865	77-92-9	77929	CASRN	Valudor Products, LLC	179 Calle Magdelena	Suite 100	Encinitas	San Diego	CA	92024	06-877-7257									VALUDOR PRODUCTS	179 CALLE MAGDALENA	SUITE 100	ENCINITAS	SAN DIEGO COUNTY	CA	92024	06-877-7257	TSCA10099039	110071000000	424690 Other Chemical And Allied Products Merchant Wholesalers	Import	424910 Farm Supplies Merchant Wholesalers	Import			Import	CBI	CBI	CBI	CBI	CBI	CBI	100,000,000 ‚Äì <250,000,000	250,000,000 ‚Äì <500,000,000	250,000,000 ‚Äì <500,000,000	250,000,000 ‚Äì <500,000,000
1,2,3-Propanetricarboxylic acid, 2-hydroxy-	33.4146	-86.8032	729764	77-92-9	77929	CASRN	INDUSTRIAL CHEMICALS INC.	2042 MONTREAT DRIVE		BIRMINGHAM	JEFFERSON	AL	35216	05-097-8329									INDUSTRIAL CHEMICALS INC	2042 MONTREAT DRIVE		VESTAVIA HILLS	JEFFERSON COUNTY	AL	35216	05-097-8329	TSCA4338	110016000000	424690 Other Chemical And Allied Products Merchant Wholesalers	Import						0	0	0	88184	172276	88184	100,000,000 ‚Äì <250,000,000	250,000,000 ‚Äì <500,000,000	250,000,000 ‚Äì <500,000,000	250,000,000 ‚Äì <500,000,000
1,2,3-Propanetricarboxylic acid, 2-hydroxy-	33.8291	-118.16	717942	77-92-9	77929	CASRN	Redox Inc	3960 Paramount Blvd	Suite 107	Lakewood	Los Angeles	CA	90712	07-735-9911									REDOX INC	3960 PARAMOUNT BLVD	SUITE 107	LAKEWOOD	LOS ANGELES COUNTY	CA	90712	07-735-9911	TSCA10072879	110071000000	424690 Other Chemical And Allied Products Merchant Wholesalers	Import									CBI	CBI	CBI	100,000,000 ‚Äì <250,000,000	250,000,000 ‚Äì <500,000,000	250,000,000 ‚Äì <500,000,000	250,000,000 ‚Äì <500,000,000
1,2,3-Propanetricarboxylic acid, 2-hydroxy-	33.8777	-84.7079	727343	77-92-9	77929	CASRN	HARCROS CHEMICALS	5200 SPEAKER ROAD		KANSAS CITY	Wyandotte	KS	66106	08-016-6983									HARCROS CHEMICALS INC	4030 FAMBROUGH DRIVE		POWDER SPRINGS	COBB COUNTY	GA	30127-5338	10-200-8976	100600820	110001000000	424690 Other Chemical And Allied Products Merchant Wholesalers	Import					Import	0	305800	305800	145100	88000	88000	100,000,000 ‚Äì <250,000,000	250,000,000 ‚Äì <500,000,000	250,000,000 ‚Äì <500,000,000	250,000,000 ‚Äì <500,000,000
1,2,3-Propanetricarboxylic acid, 2-hydroxy-	33.9019	-84.4598	730940	77-92-9	77929	CASRN	KEMIRA CHEMICALS, INC.	1000 PARKWOOD CIRCLE, SUITE 500		ATLANTA	Cobb	GA	30339	03-387-0585									Kemira Chemicals, Inc.	1000 Parkwood Circle, Suite 500		Atlanta		GA	30339	03-387-0585	TSCA7204	110055000000	325130 Synthetic Dye And Pigment Manufacturing	Import	325199 All Other Basic Organic Chemical Manufacturing	Import	325180 Other Basic Inorganic Chemical Manufacturing	Import	Import	0	780000	780000	920000	970000	880000	100,000,000 ‚Äì <250,000,000	250,000,000 ‚Äì <500,000,000	250,000,000 ‚Äì <500,000,000	250,000,000 ‚Äì <500,000,000
1,2,3-Propanetricarboxylic acid, 2-hydroxy-	33.9452	-78.0012	731768	77-92-9	77929	CASRN	Archer Daniels Midland Company	4666 E FARIES PARKWAY		Decatur	MACON	IL	62526	00-130-7586									ADM-SOUTHPORT-SPECIALTY INGREDIENTS DIV	1730 E MOORE ST		SOUTHPORT	BRUNSWICK COUNTY	NC	28461	07-557-8385	TSCA5636	110000000000	325199 All Other Basic Organic Chemical Manufacturing	Manufacture					Manufacture	29900000	0	29900000	26000000	30300000	46000000	100,000,000 ‚Äì <250,000,000	250,000,000 ‚Äì <500,000,000	250,000,000 ‚Äì <500,000,000	250,000,000 ‚Äì <500,000,000
1,2,3-Propanetricarboxylic acid, 2-hydroxy-	34.052	-117.627	713737	77-92-9	77929	CASRN	Wintersun International Inc	1250 E. Belmont St		Ontario	San Bernardino	CA	91761	06-817-8032									WINTERSUN CHEMICAL	1250 E. BELMONT ST.		ONTARIO	SAN BERNARDINO COUNTY	CA	91761	06-817-8032	TSCA79242	110064000000	422690 Other Chemical And Allied Products Wholesalers	Import					Import	0	41887	41887	615387	613887	390000	100,000,000 ‚Äì <250,000,000	250,000,000 ‚Äì <500,000,000	250,000,000 ‚Äì <500,000,000	250,000,000 ‚Äì <500,000,000
1,2,3-Propanetricarboxylic acid, 2-hydroxy-	34.6967	-84.9846	724197	77-92-9	77929	CASRN	HARCROS CHEMICALS	5200 SPEAKER ROAD		KANSAS CITY	Wyandotte	KS	66106	08-016-6983									HARCROS CHEMICALS, INC.	3452 CORPORATE DRIVE		DALTON		GA	30720	06-283-1962	TSCA5384	110044000000	325188 All Other Basic Inorganic Chemical Manufacturing	Both	325998 All Other Miscellaneous Chemical Product And Preparation Manufacturing	Both							0	63800	143000	100,000,000 ‚Äì <250,000,000	250,000,000 ‚Äì <500,000,000	250,000,000 ‚Äì <500,000,000	250,000,000 ‚Äì <500,000,000
1,2,3-Propanetricarboxylic acid, 2-hydroxy-	34.949	-80.9808	713481	77-92-9	77929	CASRN	Rudolf Venture Chemical	2199 Burkett Rd		Rock Hill	SC	SC	29730	87-268-5131	RUDOLF GMBH	Altvaterstr 58-64		GERETSRIED		82538	GM	31-557-8666	RUDOLF VENTURE CHEMICAL INC	2199 BURKETTE RD		ROCK HILL	YORK COUNTY	SC	29730	87-268-5131	TSCA9274	110038000000	325998 All Other Miscellaneous Chemical Product And Preparation Manufacturing	Manufacture					Import	0	2681	2681	992	772	417	100,000,000 ‚Äì <250,000,000	250,000,000 ‚Äì <500,000,000	250,000,000 ‚Äì <500,000,000	250,000,000 ‚Äì <500,000,000
1,2,3-Propanetricarboxylic acid, 2-hydroxy-	35.0386	-89.9322	739631	77-92-9	77929	CASRN	IDEAL CHEMICAL & SUPPLY COMPANY	4025 AIR PARK STREET		MEMPHIS	Shelby	TN	38118	00-704-0348									IDEAL CHEMICAL & SUPPLY CO	4025 AIR PARK ST.		MEMPHIS	SHELBY COUNTY	TN	38118-9036	00-704-0348	TSCA4306	110000000000	424690 Other Chemical And Allied Products Merchant Wholesalers	Import					Import	0	290409	290409	104025	381997	428126	100,000,000 ‚Äì <250,000,000	250,000,000 ‚Äì <500,000,000	250,000,000 ‚Äì <500,000,000	250,000,000 ‚Äì <500,000,000
1,2,3-Propanetricarboxylic acid, 2-hydroxy-	35.0562	-82.0966	735672	77-92-9	77929	CASRN	Hubbard-Hall Inc	PO BOX 790		Waterbury	New Haven	CT	6720	05-531-0759									HUBBARD-HALL INC	1101 COMPTON BRIDGE RD.		INMAN	SPARTANBURG	SC	293490969	05-531-0759	TSCA122909	110000000000	424690 Other Chemical And Allied Products Merchant Wholesalers	Both									0	0	352000	100,000,000 ‚Äì <250,000,000	250,000,000 ‚Äì <500,000,000	250,000,000 ‚Äì <500,000,000	250,000,000 ‚Äì <500,000,000
1,2,3-Propanetricarboxylic acid, 2-hydroxy-	35.0878	-80.9599	740218	77-92-9	77929	CASRN	Diversey, Inc.	1300 Altura Rd	Suite 125	Fort Mill	York	SC	29708	01-824-0817									DIVERSEY, INC.	1300 ALTURA RD	SUITE 125	FORT MILL	YORK COUNTY	SC	29708	01-824-0817	TSCA10057935	110071000000	325611 Soap And Other Detergent Manufacturing	Import					Import	0	131264	131264	96798	82225	101479	100,000,000 ‚Äì <250,000,000	250,000,000 ‚Äì <500,000,000	250,000,000 ‚Äì <500,000,000	250,000,000 ‚Äì <500,000,000
1,2,3-Propanetricarboxylic acid, 2-hydroxy-	35.1553	-80.8378	716415	77-92-9	77929	CASRN	ALBEMARLE CORP	4350 Congress Street	Suite 700	Charlotte	Mecklenberg	NC	28209	82-508-0096									ALBEMARLE CORP - HQ/CHARLOTTE	4250 CONGRESS ST	SUITE 900	CHARLOTTE	MECKLENBURG COUNTY	NC	28209	82-508-0096	TSCA10071899	110071000000	325180 Other Basic Inorganic Chemical Manufacturing	Import	325199 All Other Basic Organic Chemical Manufacturing	Import			Import	CBI	CBI	CBI	CBI	CBI	CBI	100,000,000 ‚Äì <250,000,000	250,000,000 ‚Äì <500,000,000	250,000,000 ‚Äì <500,000,000	250,000,000 ‚Äì <500,000,000
1,2,3-Propanetricarboxylic acid, 2-hydroxy-	35.171	-89.9956	737680	77-92-9	77929	CASRN	BUCKMAN LABORATORIES INC.	1256 NORTH MCLEAN BLVD		MEMPHIS	Shelby	TN	38108	18-895-3434									BUCKMAN LABORATORIES INC	1256 NORTH MCLEAN BOULEVARD		MEMPHIS	SHELBY COUNTY	TN	38108-1241	18-895-3434	TSCA4465	110000000000	325998 All Other Miscellaneous Chemical Product And Preparation Manufacturing	Both						0	0	0	70956	0	0	100,000,000 ‚Äì <250,000,000	250,000,000 ‚Äì <500,000,000	250,000,000 ‚Äì <500,000,000	250,000,000 ‚Äì <500,000,000
1,2,3-Propanetricarboxylic acid, 2-hydroxy-	35.5432	-81.2272	728216	77-92-9	77929	CASRN	CATALER NORTH AMERICA	2002 CATALER DRIVE		LINCOLNTON	Lincoln	NC	28092	05-535-0776									CATALER NORTH AMERICA CORP	2002 CATALER DRIVE		LINCOLNTON	LINCOLN	NC	28092-6138	05-535-0776	100605114	110012000000	336999 All Other Transportation Equipment Manufacturing	Manufacture					Import	0	40040	40040	40040	41580	38500	100,000,000 ‚Äì <250,000,000	250,000,000 ‚Äì <500,000,000	250,000,000 ‚Äì <500,000,000	250,000,000 ‚Äì <500,000,000
1,2,3-Propanetricarboxylic acid, 2-hydroxy-	37.7932	-122.4	729303	77-92-9	77929	CASRN	Wilbur-Ellis Company LLC	345 California Street	27th Floor	San Francisco	San Francisco	CA	94104	00-691-2075									CONNELL BROS. CO. LLC	345 CALIFORNIA ST	FLOOR 27	SAN FRANCISCO	SAN FRANCISCO COUNTY	CA	94104	00-691-3479	TSCA124303	110070000000	424910 Farm Supplies Merchant Wholesalers	Import						0	0	0	266784	997219	173742	100,000,000 ‚Äì <250,000,000	250,000,000 ‚Äì <500,000,000	250,000,000 ‚Äì <500,000,000	250,000,000 ‚Äì <500,000,000
1,2,3-Propanetricarboxylic acid, 2-hydroxy-	39.0949	-94.6966	730200	77-92-9	77929	CASRN	Harcros Chemicals INC	5200 SPEAKER ROAD		Kansas City	KS	KS	66106	08-016-6983									HARCROS CHEMICALS INC	5200 SPEAKER ROAD		KANSAS CITY	WYANDOTTE	KS	66106-1048	08-016-6983	100600787	110001000000	325613 Surface Active Agent Manufacturing	Both					Import	0	43850	43850	0	176000	88000	100,000,000 ‚Äì <250,000,000	250,000,000 ‚Äì <500,000,000	250,000,000 ‚Äì <500,000,000	250,000,000 ‚Äì <500,000,000
1,2,3-Propanetricarboxylic acid, 2-hydroxy-	39.1029	-84.5066	742054	77-92-9	77929	CASRN	THE PROCTER & GAMBLE COMPANY	2 P&G Plaza		CINCINNATI	Hamilton	OH	45202	00-131-6827									PROCTER & GAMBLE CO	1 PROCTER AND GAMBLE PLAZA		CINCINNATI		OH	45202-3393	00-131-6827	TSCA7054	110009000000	551114 Corporate, Subsidiary, And Regional Managing Offices	Import					Import	CBI	CBI	CBI	CBI	CBI	CBI	100,000,000 ‚Äì <250,000,000	250,000,000 ‚Äì <500,000,000	250,000,000 ‚Äì <500,000,000	250,000,000 ‚Äì <500,000,000
1,2,3-Propanetricarboxylic acid, 2-hydroxy-	39.7662	-104.817	733279	77-92-9	77929	CASRN	Uzin Utz	14509 East 33rd Place Unit G		Aurora	CO	CO	80011	14-509-3380									UZIN UTZ NORTH AMERICA	14509 E 33RD PL		AURORA	ADAMS COUNTY	CO	80011	86-117-4608	TSCA10049412	110071000000	423320 Brick, Stone, And Related Construction Material Merchant Wholesalers	Manufacture					Import	CBI	CBI	CBI	CBI	CBI	CBI	100,000,000 ‚Äì <250,000,000	250,000,000 ‚Äì <500,000,000	250,000,000 ‚Äì <500,000,000	250,000,000 ‚Äì <500,000,000
1,2,3-Propanetricarboxylic acid, 2-hydroxy-	39.8019	-105.047	705866	77-92-9	77929	CASRN	INDUSTRIAL CHEMICALS CORPORATION	4631 WEST 58TH AVENUE	4711 WEST 58TH AVENUE	ARVADA	SW ADAMS	CO	80002	03-198-8728									INDUSTRIAL CHEMICALS CORPORATION	4631 W. 58TH AVENUE		ARVADA	ADAMS	CO	80002	03-198-8728	100606484	110001000000	424690 Other Chemical And Allied Products Merchant Wholesalers	Import					Import	0	44092	44092	87964	87964	44092	100,000,000 ‚Äì <250,000,000	250,000,000 ‚Äì <500,000,000	250,000,000 ‚Äì <500,000,000	250,000,000 ‚Äì <500,000,000
1,2,3-Propanetricarboxylic acid, 2-hydroxy-	39.8218	-84.1693	723847	77-92-9	77929	CASRN	TATE & LYLE INGREDIENTS AMERICAS LLC	2200 EAST ELDORADO STREET		DECATUR	Macon	IL	62521	12-232-0559									TATE&LYLE CITRIC ACID	5600 BRENTLINGER DRIVE		DAYTON	MONTGOMERY	OH	45414-3512	07-469-4746	100608213	110000000000	325199 All Other Basic Organic Chemical Manufacturing	Manufacture					Manufacture	CBI	0	CBI	CBI	CBI	CBI	100,000,000 ‚Äì <250,000,000	250,000,000 ‚Äì <500,000,000	250,000,000 ‚Äì <500,000,000	250,000,000 ‚Äì <500,000,000
1,2,3-Propanetricarboxylic acid, 2-hydroxy-	39.8483	-88.9276	723856	77-92-9	77929	CASRN	TATE & LYLE INGREDIENTS AMERICAS LLC	2200 EAST ELDORADO STREET		DECATUR	Macon	IL	62521	12-232-0559									TATE & LYLE INGREDIENTS AMERICAS LLC	2200 EAST ELDORADO STREET		DECATUR	MACON	IL	62521	12-232-0559	TSCA7418	110001000000	311221 Wet Corn Milling	Manufacture					Import	CBI	CBI	CBI	0	0	0	100,000,000 ‚Äì <250,000,000	250,000,000 ‚Äì <500,000,000	250,000,000 ‚Äì <500,000,000	250,000,000 ‚Äì <500,000,000
1,2,3-Propanetricarboxylic acid, 2-hydroxy-	40.0965	-74.8781	703703	77-92-9	77929	CASRN	GEORGE S. COYNE CHEMICAL CO., INC.	3015 STATE ROAD		CROYDON	Bucks	PA	19021	01-466-7240									GEORGE S COYNE CHEMICAL CO INC	3015 STATE ROAD		CROYDON	BUCKS COUNTY	PA	19021-6962	01-466-7240	TSCA6552	110008000000	424690 Other Chemical And Allied Products Merchant Wholesalers	Import									0	83775	257938	100,000,000 ‚Äì <250,000,000	250,000,000 ‚Äì <500,000,000	250,000,000 ‚Äì <500,000,000	250,000,000 ‚Äì <500,000,000
1,2,3-Propanetricarboxylic acid, 2-hydroxy-	40.2033	-75.0835	734145	77-92-9	77929	CASRN	Gehring-Montgomery, Inc.	710 Louis Drive		Warminster	Bucks	PA	18974	11-434-1357	TER HELL & CO GMBH	Borsenbrucke 2		Hamburg		20457	GM	11-434-1357	GEHRING MONTGOMERY	710 LOUIS DRIVE		WARMINSTER	BUCKS	PA	18974-2829	11-434-1357	100606008	110000000000	325998 All Other Miscellaneous Chemical Product And Preparation Manufacturing	Both					Manufacture	210600	0	210600	228982	222995	181769	100,000,000 ‚Äì <250,000,000	250,000,000 ‚Äì <500,000,000	250,000,000 ‚Äì <500,000,000	250,000,000 ‚Äì <500,000,000
1,2,3-Propanetricarboxylic acid, 2-hydroxy-	40.6801	-74.4319	726219	77-92-9	77929	CASRN	Vitusa Products	343 Snyder Ave		Berkeley Heights	Union	NJ	7922	19-570-2626									VITUSA PRODUCTS INC	343 SNYDER AVENUE		BERKELEY HEIGHTS	UNION	NJ	07922-1548	19-570-2626	TSCA9387	110022000000	424690 Other Chemical And Allied Products Merchant Wholesalers	Import									0	1662500	939487	100,000,000 ‚Äì <250,000,000	250,000,000 ‚Äì <500,000,000	250,000,000 ‚Äì <500,000,000	250,000,000 ‚Äì <500,000,000
1,2,3-Propanetricarboxylic acid, 2-hydroxy-	40.742	-111.945	738271	77-92-9	77929	CASRN	THATCHER COMPANY	1905 FORTUNE ROAD		SALT LAKE CITY	Salt Lake	UT	84104	04-130-7356									THATCHER CO	1905 FORTUNE ROAD		SALT LAKE CITY	SALT LAKE COUNTY	UT	84104-3724	04-130-7356	TSCA9584	110000000000	325180 Other Basic Inorganic Chemical Manufacturing	Both									714000	630000	238000	100,000,000 ‚Äì <250,000,000	250,000,000 ‚Äì <500,000,000	250,000,000 ‚Äì <500,000,000	250,000,000 ‚Äì <500,000,000
1,2,3-Propanetricarboxylic acid, 2-hydroxy-	40.7734	-74.4261	727083	77-92-9	77929	CASRN	BASF Corporation	100 Park Avenue		Florham Park	NJ	MI	7932	00-130-7032	BASF SE	Carl-Bosch Strasse 38		Ludwigshafen		60756	GM	31-500-0554	BASF IMPORTS PART 1	100 PARK AVE		FLORHAM PARK	MORRIS COUNTY	NJ	7932	00-130-7032	TSCA130148	110070000000	325199 All Other Basic Organic Chemical Manufacturing	Import					Import	CBI	CBI	CBI	CBI	CBI	CBI	100,000,000 ‚Äì <250,000,000	250,000,000 ‚Äì <500,000,000	250,000,000 ‚Äì <500,000,000	250,000,000 ‚Äì <500,000,000
1,2,3-Propanetricarboxylic acid, 2-hydroxy-	40.8705	-74.4506	710158	77-92-9	77929	CASRN	RECKITT BENCKISER	399 INTERPACE PARKWAY		PARSIPPANY	Morris	NJ	7054	09-440-5024	RECKITT BENCKISER GROUP PLC	Turner House		Slough		SL1 3UH	UK	21-557-6498	RECKITT BENCKISER	399 INTERPACE PKWY		PARSIPPANY		NJ	7054	09-440-5024	TSCA10066040	110067000000	325611 Soap And Other Detergent Manufacturing	Both					Import	0	241160	241160	182215	185755	150143	100,000,000 ‚Äì <250,000,000	250,000,000 ‚Äì <500,000,000	250,000,000 ‚Äì <500,000,000	250,000,000 ‚Äì <500,000,000
1,2,3-Propanetricarboxylic acid, 2-hydroxy-	40.8835	-74.2936	707677	77-92-9	77929	CASRN	Delta Carbona, L.P.	376 Hollywood Ave	Suite 208	Fairfield	Essex	NJ	7004	13-377-7208									DELTA CARBONA, L.P.	376 HOLLYWOOD AVE	SUITE 208	FAIRFIELD	ESSEX COUNTY	NJ	7004	13-377-7208	TSCA10060819	110071000000	325611 Soap And Other Detergent Manufacturing	Import					Import	0	867254	867254	824808	148273	89912	100,000,000 ‚Äì <250,000,000	250,000,000 ‚Äì <500,000,000	250,000,000 ‚Äì <500,000,000	250,000,000 ‚Äì <500,000,000
1,2,3-Propanetricarboxylic acid, 2-hydroxy-	41.0209	-74.2629	717445	77-92-9	77929	CASRN	BROWN CHEMICAL	PO BOX 440	302 W Oakland Ave	OAKLAND	Bergen	NJ	7436	01-161-0870									BROWN CHEMICAL CO INC	302 W OAKLAND AVE		OAKLAND	BERGEN COUNTY	NJ	74361381	01-161-0870	TSCA6225	110004000000	424690 Other Chemical And Allied Products Merchant Wholesalers	Import					Import	0	210880	210880	113810	193595	0	100,000,000 ‚Äì <250,000,000	250,000,000 ‚Äì <500,000,000	250,000,000 ‚Äì <500,000,000	250,000,000 ‚Äì <500,000,000
1,2,3-Propanetricarboxylic acid, 2-hydroxy-	41.0298	-73.774	706611	77-92-9	77929	CASRN	Marubeni America Corporation	375 Lexington Ave.		New York	New York	NY	10017	00-167-0876									MARUBENI SPECIALTY CHEMICALS INC.	10 BANK ST	SUITE 740	WHITE PLAINS	WESTCHESTER COUNTY	NY	10606	78-727-6633	TSCA4463	110005000000	424690 Other Chemical And Allied Products Merchant Wholesalers	Import									0	129306	129306	100,000,000 ‚Äì <250,000,000	250,000,000 ‚Äì <500,000,000	250,000,000 ‚Äì <500,000,000	250,000,000 ‚Äì <500,000,000
1,2,3-Propanetricarboxylic acid, 2-hydroxy-	41.1369	-92.6452	716079	77-92-9	77929	CASRN	Cargill, Incorporated	15407 McGinty Road West		Wayzata	Hennepin	MN	55391	00-624-9189									CARGILL INC - EDDYVILLE IA	1 CARGILL DR		EDDYVILLE	MONROE COUNTY	IA	52553-5000	07-533-2598	TSCA10058339	110069000000	311221 Wet Corn Milling	Manufacture	325193 Ethyl Alcohol Manufacturing	Manufacture			Manufacture	CBI	0	CBI	CBI	CBI	CBI	100,000,000 ‚Äì <250,000,000	250,000,000 ‚Äì <500,000,000	250,000,000 ‚Äì <500,000,000	250,000,000 ‚Äì <500,000,000
1,2,3-Propanetricarboxylic acid, 2-hydroxy-	41.2205	-96.0535	725558	77-92-9	77929	CASRN	HARCROS CHEMICALS	5200 SPEAKER ROAD		KANSAS CITY	Wyandotte	KS	66106	08-016-6983									HARCROS CHEMICALS INCORPORATED	9000 F. ST.		OMAHA	DOUGLAS COUNTY	NE	68127	03-483-7864	100600819	110000000000	424690 Other Chemical And Allied Products Merchant Wholesalers	Import									88000	44000	88000	100,000,000 ‚Äì <250,000,000	250,000,000 ‚Äì <500,000,000	250,000,000 ‚Äì <500,000,000	250,000,000 ‚Äì <500,000,000
1,2,3-Propanetricarboxylic acid, 2-hydroxy-	41.7027	-83.5309	735958	77-92-9	77929	CASRN	PERSTORP POLYOLS	600 MATZINGER		TOLEDO	Lucas	OH	43612	14-433-3010	PERSTORP AB	Perstorp Industripark		Perstorp	Skane	28480	SW	35-397-2060	PERSTORP POLYOLS INC	600 MATZINGER ROAD		TOLEDO		OH	43612-2695	14-433-3010	TSCA6011	110000000000	325199 All Other Basic Organic Chemical Manufacturing	Both					Import	CBI	CBI	CBI	CBI	CBI	CBI	100,000,000 ‚Äì <250,000,000	250,000,000 ‚Äì <500,000,000	250,000,000 ‚Äì <500,000,000	250,000,000 ‚Äì <500,000,000
1,2,3-Propanetricarboxylic acid, 2-hydroxy-	41.7292	-74.0609	739403	77-92-9	77929	CASRN	KIC CHEMICALS INC	87 SOUTH OHIOVILLE RD		NEW PALTZ	ULSTER	NY	12561	13-180-8123									KIC Chemicals Inc	87 South Ohioville Rd		New Paltz		NY	12561	13-180-8123	TSCA9414	110057000000	424690 Other Chemical And Allied Products Merchant Wholesalers	Import					Import	0	75126	75126	59400	68800	107900	100,000,000 ‚Äì <250,000,000	250,000,000 ‚Äì <500,000,000	250,000,000 ‚Äì <500,000,000	250,000,000 ‚Äì <500,000,000
1,2,3-Propanetricarboxylic acid, 2-hydroxy-	41.9365	-71.1293	703471	77-92-9	77929	CASRN	EMD Holding Corp	One Technology Place		Rockland	Plymounth	MA	2370	96-370-9014									EMD MILLIPORE CORP	530 JOHN HANCOCK RD	SUITE 100	TAUNTON	BRISTOL	MA	2780	07-878-4283	TSCA10058214	110045000000	325180 Other Basic Inorganic Chemical Manufacturing	Import	325414 Biological Product (Except Diagnostic) Manufacturing	Import	325199 All Other Basic Organic Chemical Manufacturing	Import	Import	CBI	CBI	CBI	CBI	CBI	CBI	100,000,000 ‚Äì <250,000,000	250,000,000 ‚Äì <500,000,000	250,000,000 ‚Äì <500,000,000	250,000,000 ‚Äì <500,000,000
1,2,3-Propanetricarboxylic acid, 2-hydroxy-	42.2923	-71.1988	729733	77-92-9	77929	CASRN	JUNGBUNZLAUER INC	95 WELLS AVENUE	Suite 150	NEWTON	Middlesex	MA	2459	09-586-4101	JUNGBUNZLAUER HOLDING AG	St. Alban-Vorstadt 90		Basel		4002	SZ	48-236-6101	JUNGBUNZLAUER, INC.	95 WELLS AVENUE		NEWTON CENTRE	MIDDLESEX COUNTY	MA	02459-3261	09-586-4104	TSCA4614	110040000000	325199 All Other Basic Organic Chemical Manufacturing	Import					Import	0	29887012	29887012	26557604	36998788	22081505	100,000,000 ‚Äì <250,000,000	250,000,000 ‚Äì <500,000,000	250,000,000 ‚Äì <500,000,000	250,000,000 ‚Äì <500,000,000
1,2,3-Propanetricarboxylic acid, 2-hydroxy-	42.3488	-71.5231	736131	77-92-9	77929	CASRN	UNIVAR SOLUTIONS INC.	3075 Highland Pkwy., Ste. 200		Downers Grove	DuPage	IL	60515-5560	09-887-7053									UNIVAR SOLUTIONS USA INC MARLBOROUGH	221 BOSTON POST ROAD, EAST		MARLBOROUGH	MIDDLESEX COUNTY	MA	01752-3545	04-170-1589	TSCA7802	110057000000	424690 Other Chemical And Allied Products Merchant Wholesalers	Import						0	0	0	0	0	3906036	100,000,000 ‚Äì <250,000,000	250,000,000 ‚Äì <500,000,000	250,000,000 ‚Äì <500,000,000	250,000,000 ‚Äì <500,000,000
1,2,3-Propanetricarboxylic acid, 2-hydroxy-	42.3613	-83.1873	719612	77-92-9	77929	CASRN	PRESSURE VESSEL SERVICE, INC.	10900 HARPER AVENUE		DETROIT	WAYNE	MI	48213	00-653-0273									PVS NOLWOOD CHEMICALS INC	9000 HUBBELL AVENUE		DETROIT	WAYNE	MI	48228-2331	00-491-2309	100607665	110018000000	424690 Other Chemical And Allied Products Merchant Wholesalers	Both					Import	0	1576289	1576289	352736	44092	1760368	100,000,000 ‚Äì <250,000,000	250,000,000 ‚Äì <500,000,000	250,000,000 ‚Äì <500,000,000	250,000,000 ‚Äì <500,000,000
1,2,3-Propanetricarboxylic acid, 2-hydroxy-	43.0975	-88.0606	722103	77-92-9	77929	CASRN	BRENNTAG GREAT LAKES, LLC	P.O. BOX 444		BUTLER	Milwaukee	WI	53007	04-245-4228	BRENNTAG AG	Messeallee 11		Essen		45131	GM	50-709-1739	BRENNTAG GREAT LAKES, LLC - WAUWATOSA WAREHOUSE	4420 N HARLEY DAVIDSON AVE		WAUWATOSA	MILWAUKEE COUNTY	WI	53226	04-245-4228	100601681	110019000000	424690 Other Chemical And Allied Products Merchant Wholesalers	Import					Import	0	1265298	1265298	916644	1703236	1902966	100,000,000 ‚Äì <250,000,000	250,000,000 ‚Äì <500,000,000	250,000,000 ‚Äì <500,000,000	250,000,000 ‚Äì <500,000,000
1,2,3-Propanetricarboxylic acid, 2-hydroxy-	43.234	-77.1832	739153	77-92-9	77929	CASRN	THATCHER COMPANY	1905 FORTUNE ROAD		SALT LAKE CITY	Salt Lake	UT	84104	04-130-7356									THATCHER CO OF NEW YORK	4135 RTE. 104		WILLIAMSON	WAYNE COUNTY	NY	14589	78-562-4636	TSCA9589	110000000000	325180 Other Basic Inorganic Chemical Manufacturing	Both									0	0	42000	100,000,000 ‚Äì <250,000,000	250,000,000 ‚Äì <500,000,000	250,000,000 ‚Äì <500,000,000	250,000,000 ‚Äì <500,000,000
1,2,3-Propanetricarboxylic acid, 2-hydroxy-	44.9733	-93.2753	721170	77-92-9	77929	CASRN	Target Corporation	1000 Nicollet Mall		Minneapolis	Hennepin	MN	55403	19-646-1180									TARGET CORP	1000 NICOLLET MALL		MINNEAPOLIS	HENNEPIN	MN	55403-2467	19-646-1180	TSCA127583	110009000000	453998 All Other Miscellaneous Store Retailers (Except Tobacco Stores)	Import					Import	0	19000	19000	71700	6650	109	100,000,000 ‚Äì <250,000,000	250,000,000 ‚Äì <500,000,000	250,000,000 ‚Äì <500,000,000	250,000,000 ‚Äì <500,000,000
1,2,3-Propanetricarboxylic acid, 2-hydroxy-	45.5742	-122.635	725221	77-92-9	77929	CASRN	TARR, LLC	PO BOX 12570		PORTLAND	Multnomah	OR	97212-0570	02-774-9209									TARR, LLC	2946 NE COLUMBIA BLVD		PORTLAND	MULTNOMAH	OR	97211	02-774-9209	TSCA115041	110044000000	424690 Other Chemical And Allied Products Merchant Wholesalers	Import						0	0	0	176000	175927	44092	100,000,000 ‚Äì <250,000,000	250,000,000 ‚Äì <500,000,000	250,000,000 ‚Äì <500,000,000	250,000,000 ‚Äì <500,000,000
1,2,3-Propanetricarboxylic acid, 2-hydroxy-	47.6393	-122.357	741167	77-92-9	77929	CASRN	SILVER FERN CHEMICAL	2226 QUEEN ANNE AVENUE N.		SEATTLE	King	WA	98109	14-454-2433									Silver Fern Chemical	2226 Queen Anne Avenue North		Seattle		WA	98109	14-454-2433	TSCA8180	110057000000	424690 Other Chemical And Allied Products Merchant Wholesalers	Import						0	0	0	0	264000	176000	100,000,000 ‚Äì <250,000,000	250,000,000 ‚Äì <500,000,000	250,000,000 ‚Äì <500,000,000	250,000,000 ‚Äì <500,000,000
1,2,3-Propanetricarboxylic acid, 2-hydroxy-	47.6728	-122.107	738879	77-92-9	77929	CASRN	UNIVAR SOLUTIONS INC.	3075 Highland Pkwy., Ste. 200		Downers Grove	DuPage	IL	60515-5560	09-887-7053									UNIVAR SOLUTIONS USA INC	17411 NE UNION HILL RD.		REDMOND	KING COUNTY	WA	98052	10-297-1785	TSCA119921	110069000000	424690 Other Chemical And Allied Products Merchant Wholesalers	Import						0	0	0	0	22765853	29937337	100,000,000 ‚Äì <250,000,000	250,000,000 ‚Äì <500,000,000	250,000,000 ‚Äì <500,000,000	250,000,000 ‚Äì <500,000,000
1,2,3-Propanetricarboxylic acid, 2-hydroxy-, 1,2,3-tributyl ester	33.9871	-118.166	702998	77-94-1	77941	CASRN	The Sherwin Williams Company	101 Prospect Ave NW		Cleveland	Cuyahoga	OH	44115	00-420-6397									ENGINEERED POLYMER SOLUTIONS INC	5501 E. SLAUSON		LOS ANGELES	LOS ANGELES	CA	90040-2920	92-842-6584	TSCA5741	110001000000	325211 Plastics Material And Resin Manufacturing	Both					Manufacture	CBI	0	CBI	CBI	CBI	CBI	1,000,000 ‚Äì <10,000,000	1,000,000 ‚Äì <10,000,000	1,000,000 ‚Äì <10,000,000	1,000,000 ‚Äì <10,000,000
1,2,3-Propanetricarboxylic acid, 2-hydroxy-, 1,2,3-tributyl ester	36.0402	-79.7786	717475	77-94-1	77941	CASRN	LANXESS CORPORATION	111 RIDC PARK WEST DRIVE		PITTSBURGH	Allegheny	PA	15275	14-585-8770	LANXESS DEUTSCHLAND GMBH	Kennedyplatz 1		Koln		50569	GM	31-546-4482	LANXESS CORPORATION GREENSBORO	520 BROOME RD.		GREENSBORO	GUILFORD COUNTY	NC	27406-3799	06-179-5696	100608461	110000000000	325199 All Other Basic Organic Chemical Manufacturing	Manufacture					Manufacture	26543	0	26543	95063	407515	358590	1,000,000 ‚Äì <10,000,000	1,000,000 ‚Äì <10,000,000	1,000,000 ‚Äì <10,000,000	1,000,000 ‚Äì <10,000,000
1,2,3-Propanetricarboxylic acid, 2-hydroxy-, 1,2,3-tributyl ester	36.0599	-79.8285	718209	77-94-1	77941	CASRN	VERTELLUS LLC	201 NORTH ILLINOIS STREET	Suite 1800	INDIANAPOLIS	Marion	IN	46204	07-934-5010									VERTELLUS GREENSBORO LLC	2110 HIGH POINT RD.		GREENSBORO	GUILFORD COUNTY	NC	27403	08-048-4759	TSCA9666	110000000000	325199 All Other Basic Organic Chemical Manufacturing	Both					Both	CBI	CBI	CBI	CBI	CBI	CBI	1,000,000 ‚Äì <10,000,000	1,000,000 ‚Äì <10,000,000	1,000,000 ‚Äì <10,000,000	1,000,000 ‚Äì <10,000,000
1,2,3-Propanetricarboxylic acid, 2-hydroxy-, 1,2,3-tributyl ester	42.2923	-71.1988	729735	77-94-1	77941	CASRN	JUNGBUNZLAUER INC	95 WELLS AVENUE	Suite 150	NEWTON	Middlesex	MA	2459	09-586-4101	JUNGBUNZLAUER HOLDING AG	St. Alban-Vorstadt 90		Basel		4002	SZ	48-236-6101	JUNGBUNZLAUER, INC.	95 WELLS AVENUE		NEWTON CENTRE	MIDDLESEX COUNTY	MA	02459-3261	09-586-4104	TSCA4614	110040000000	325199 All Other Basic Organic Chemical Manufacturing	Import					Import	0	26499	26499	23942	46297	14815	1,000,000 ‚Äì <10,000,000	1,000,000 ‚Äì <10,000,000	1,000,000 ‚Äì <10,000,000	1,000,000 ‚Äì <10,000,000
1,2,3-Propanetricarboxylic acid, 2-hydroxy-, 1,2,3-triethyl ester	36.0402	-79.7786	717474	77-93-0	77930	CASRN	LANXESS CORPORATION	111 RIDC PARK WEST DRIVE		PITTSBURGH	Allegheny	PA	15275	14-585-8770	LANXESS DEUTSCHLAND GMBH	Kennedyplatz 1		Koln		50569	GM	31-546-4482	LANXESS CORPORATION GREENSBORO	520 BROOME RD.		GREENSBORO	GUILFORD COUNTY	NC	27406-3799	06-179-5696	100608461	110000000000	325199 All Other Basic Organic Chemical Manufacturing	Manufacture					Manufacture	60053	0	60053	0	538692	630064	1,000,000 ‚Äì <10,000,000	1,000,000 ‚Äì <10,000,000	1,000,000 ‚Äì <10,000,000	1,000,000 ‚Äì <10,000,000
1,2,3-Propanetricarboxylic acid, 2-hydroxy-, 1,2,3-triethyl ester	36.0599	-79.8285	718208	77-93-0	77930	CASRN	VERTELLUS LLC	201 NORTH ILLINOIS STREET	Suite 1800	INDIANAPOLIS	Marion	IN	46204	07-934-5010									VERTELLUS GREENSBORO LLC	2110 HIGH POINT RD.		GREENSBORO	GUILFORD COUNTY	NC	27403	08-048-4759	TSCA9666	110000000000	325199 All Other Basic Organic Chemical Manufacturing	Both					Manufacture	CBI	CBI	CBI	CBI	CBI	CBI	1,000,000 ‚Äì <10,000,000	1,000,000 ‚Äì <10,000,000	1,000,000 ‚Äì <10,000,000	1,000,000 ‚Äì <10,000,000
1,2,3-Propanetricarboxylic acid, 2-hydroxy-, 1,2,3-triethyl ester	40.3319	-74.6197	710580	77-93-0	77930	CASRN	FIRMENICH INC	250 Plainsboro Road		Plainsboro	New Jersey	NJ	8536	00-182-5892	FIRMENICH INTERNATIONAL SA	Rue de la Bergre 7		Satigny CH-1242			SZ	48-228-3579	FIRMENICH INC	250 PLAINSBORO RD		PLAINSBORO	MERCER	NJ	8543	00-182-5892	100605886	110000000000	446120 Cosmetics, Beauty Supplies, And Perfume Stores	Withheld					CBI	CBI	CBI	CBI	CBI	0	0	1,000,000 ‚Äì <10,000,000	1,000,000 ‚Äì <10,000,000	1,000,000 ‚Äì <10,000,000	1,000,000 ‚Äì <10,000,000
1,2,3-Propanetricarboxylic acid, 2-hydroxy-, 1,2,3-triethyl ester	40.436	-74.1579	731881	77-93-0	77930	CASRN	INTERNATIONAL FLAVORS AND FRAGRANCES INC.	521-WEST 57TH STREET		NEW YORK	NEW YORK	NY	10019-2929	00-153-4833									INTERNATIONAL FLAVORS & FRAGRANCES INC.	600 HWY 36		HAZLET	MONMOUTH COUNTY	NJ	7730	05-593-6587	TSCA82690	110059000000	325620 Toilet Preparation Manufacturing	Both					Import	CBI	CBI	CBI	CBI	CBI	CBI	1,000,000 ‚Äì <10,000,000	1,000,000 ‚Äì <10,000,000	1,000,000 ‚Äì <10,000,000	1,000,000 ‚Äì <10,000,000
1,2,3-Propanetricarboxylic acid, 2-hydroxy-, 1,2,3-triethyl ester	40.8705	-74.4506	742145	77-93-0	77930	CASRN	RECKITT BENCKISER	399 INTERPACE PARKWAY		PARSIPPANY	Morris	NJ	7054	09-440-5024	RECKITT BENCKISER GROUP PLC	Turner House		Slough		SL1 3UH	UK	21-557-6498	RECKITT BENCKISER	399 INTERPACE PKWY		PARSIPPANY		NJ	7054	09-440-5024	TSCA10066040	110067000000	325611 Soap And Other Detergent Manufacturing	Both					Import	0	294	294	228	90	3	1,000,000 ‚Äì <10,000,000	1,000,000 ‚Äì <10,000,000	1,000,000 ‚Äì <10,000,000	1,000,000 ‚Äì <10,000,000
1,2,3-Propanetricarboxylic acid, 2-hydroxy-, 1,2,3-triethyl ester	40.907	-74.7312	717218	77-93-0	77930	CASRN	GIVAUDAN FRAGRANCES CORP.	717 RIDGEDALE AVE		EAST HANOVER	USA	NJ	7936	80-840-3930									GIVAUDAN FRAGRANCES CORP.	300 WATERLOO VALLEY ROAD		MOUNT OLIVE		NJ	7828	80-840-3930	200003048	110007000000	493110 General Warehousing And Storage	Both					Import	CBI	CBI	CBI	CBI	CBI	CBI	1,000,000 ‚Äì <10,000,000	1,000,000 ‚Äì <10,000,000	1,000,000 ‚Äì <10,000,000	1,000,000 ‚Äì <10,000,000
1,2,3-Propanetricarboxylic acid, 2-hydroxy-, 1,2,3-triethyl ester	41.415	-73.4097	704024	77-93-0	77930	CASRN	SI Group USA (USAA), LLC	4 Mountainview Terrace	Suite 200	Danbury	Fairfield County	CT	6810	20-370-2614									SI GROUP USA (USAA), LLC	4 MOUNTAINVIEW TER	SUITE 200	DANBURY	FAIRFIELD COUNTY	CT	6810	20-370-2614	TSCA10057986	110071000000	325199 All Other Basic Organic Chemical Manufacturing	Withheld					CBI	CBI	CBI	CBI	CBI	CBI	CBI	1,000,000 ‚Äì <10,000,000	1,000,000 ‚Äì <10,000,000	1,000,000 ‚Äì <10,000,000	1,000,000 ‚Äì <10,000,000
1,2,3-Propanetricarboxylic acid, 2-hydroxy-, 1,2,3-triethyl ester	42.2923	-71.1988	729734	77-93-0	77930	CASRN	JUNGBUNZLAUER INC	95 WELLS AVENUE	Suite 150	NEWTON	Middlesex	MA	2459	09-586-4101	JUNGBUNZLAUER HOLDING AG	St. Alban-Vorstadt 90		Basel		4002	SZ	48-236-6101	JUNGBUNZLAUER, INC.	95 WELLS AVENUE		NEWTON CENTRE	MIDDLESEX COUNTY	MA	02459-3261	09-586-4104	TSCA4614	110040000000	325199 All Other Basic Organic Chemical Manufacturing	Import					Import	0	281031	281031	347941	297290	235672	1,000,000 ‚Äì <10,000,000	1,000,000 ‚Äì <10,000,000	1,000,000 ‚Äì <10,000,000	1,000,000 ‚Äì <10,000,000
1,2,3-Propanetricarboxylic acid, 2-hydroxy-, ammonium salt (1:1)	32.7069	-96.7499	741106	4450-94-6	4450946	CASRN	VERSUM MATERIALS INC	8555 South River Parkway		Tempe	Maricopa	AZ	85284	08-007-4232	MERCK KGAA	Frankfurter Strasse 250		Darmstadt		64293	GM	34-224-9299	VERSUM MATERIALS US, LLC DALLAS	8201 S CENTRAL EXPY		DALLAS	DALLAS COUNTY	TX	75241-7819	08-040-1991	TSCA10057450	110070000000	325998 All Other Miscellaneous Chemical Product And Preparation Manufacturing	Manufacture					Manufacture	CBI	CBI	CBI	CBI	CBI	CBI	<1,000,000	<1,000,000	<1,000,000	<1,000,000
1,2,3-Propanetricarboxylic acid, 2-hydroxy-, ammonium salt (1:2)	32.7069	-96.7499	741105	3012-65-5	3012655	CASRN	VERSUM MATERIALS INC	8555 South River Parkway		Tempe	Maricopa	AZ	85284	08-007-4232	MERCK KGAA	Frankfurter Strasse 250		Darmstadt		64293	GM	34-224-9299	VERSUM MATERIALS US, LLC DALLAS	8201 S CENTRAL EXPY		DALLAS	DALLAS COUNTY	TX	75241-7819	08-040-1991	TSCA10057450	110070000000	325998 All Other Miscellaneous Chemical Product And Preparation Manufacturing	Manufacture					Manufacture	CBI	CBI	CBI	CBI	CBI	CBI	<1,000,000	<1,000,000	<1,000,000	<1,000,000
1,2,3-Propanetricarboxylic acid, 2-hydroxy-, ammonium salt (1:2)	42.5379	-92.368	708527	3012-65-5	3012655	CASRN	HYDRITE CHEMICAL CO.	300 N. PATRICK BLVD.		BROOKFIELD	Waukesha	WI	53045	00-643-5887									HYDRITE CHEMICAL CO.	2815 WCF&N DRIVE		WATERLOO	BLACK HAWK COUNTY	IA	50703-9612	05-721-3316	TSCA5179	110001000000	325180 Other Basic Inorganic Chemical Manufacturing	Manufacture	325199 All Other Basic Organic Chemical Manufacturing	Manufacture			Manufacture	19421	0	19421	185354	92123	0	<1,000,000	<1,000,000	<1,000,000	<1,000,000
1,2,3-Propanetricarboxylic acid, 2-hydroxy-, ammonium salt (1:3)	42.5379	-92.368	708528	3458-72-8	3458728	CASRN	HYDRITE CHEMICAL CO.	300 N. PATRICK BLVD.		BROOKFIELD	Waukesha	WI	53045	00-643-5887									HYDRITE CHEMICAL CO.	2815 WCF&N DRIVE		WATERLOO	BLACK HAWK COUNTY	IA	50703-9612	05-721-3316	TSCA5179	110001000000	325180 Other Basic Inorganic Chemical Manufacturing	Manufacture	325199 All Other Basic Organic Chemical Manufacturing	Manufacture			Manufacture	27605	0	27605	0	8009	0	27605	0	8009	0
1,2,3-Propanetricarboxylic acid, 2-hydroxy-, ammonium salt (1:?)	29.6046	-95.0613	723863	7632-50-0	7632500	CASRN	ChemQuest Chemicals	9730 Bay Area Blvd		Pasadena	Harris	TX	77507	83-505-2051									CHEMQUEST CHEMICALS	9730 BAY AREA BLVD		PASADENA	HARRIS COUNTY	TX	77507	83-505-2051	TSCA10003102	110060000000	325998 All Other Miscellaneous Chemical Product And Preparation Manufacturing	Manufacture					Manufacture	299760	0	299760	333780	247800	0	397710	451553	383212	313223
1,2,3-Propanetricarboxylic acid, 2-hydroxy-, ammonium salt (1:?)	40.0965	-74.8781	703700	7632-50-0	7632500	CASRN	GEORGE S. COYNE CHEMICAL CO., INC.	3015 STATE ROAD		CROYDON	Bucks	PA	19021	01-466-7240									GEORGE S COYNE CHEMICAL CO INC	3015 STATE ROAD		CROYDON	BUCKS COUNTY	PA	19021-6962	01-466-7240	TSCA6552	110008000000	424690 Other Chemical And Allied Products Merchant Wholesalers	Import									25082	23850	100103	397710	451553	383212	313223
1,2,3-Propanetricarboxylic acid, 2-hydroxy-, ammonium salt (1:?)	40.8504	-80.274	725623	7632-50-0	7632500	CASRN	NALCO- AN ECOLAB COMPANY	1601 WEST DIEHL RD		NAPERVILLE	DuPage	IL	60563	00-496-2403									NALCO COMPANY	125 NALCO WAY		ELLWOOD CITY	BEAVER	PA	16117	10-438-9205	TSCA5883	110056000000	325998 All Other Miscellaneous Chemical Product And Preparation Manufacturing	Both					Manufacture	97950	0	97950	92691	111562	213120	397710	451553	383212	313223
1,2,3-Propanetricarboxylic acid, 2-hydroxy-, manganese salt (1:?)	37.7517	-100.022	723947	10024-66-5	10024665	CASRN	WINFIELD SOLUTIONS, LLC	16380 VALLEY ROAD		EDEN PRAIRIE	Hennepin	MN	55347	80-684-3228									RSA MICROTECH LLC	510 TRAIL STREET		DODGE CITY	FORD	KS	67801-9011	27-470-2844	TSCA8308	110000000000	325312 Phosphatic Fertilizer Manufacturing	Manufacture					Manufacture	103409	0	103409	243543	204385	483209	<1,000,000	<1,000,000	<1,000,000	<1,000,000
1,2,3-Propanetricarboxylic acid, 2-hydroxy-, manganese salt (1:?)	40.7316	-86.2984	740605	10024-66-5	10024665	CASRN	The Andersons Inc.	1947 Briarfield Blvd	P.O. Box 119	Maumee	Lucas	OH	43537	19-699-1731									THE ANDERSONS LOGANSPORT TERMINAL	2345 S CR 400 E		LOGANSPORT	CASS COUNTY	IN	46947-8575	19-699-1731	TSCA124025	110001000000	325314 Fertilizer (Mixing Only) Manufacturing	Manufacture					Manufacture	CBI	0	CBI	CBI	CBI	CBI	<1,000,000	<1,000,000	<1,000,000	<1,000,000
1,2,3-Propanetricarboxylic acid, 2-hydroxy-, manganese salt (1:?)	40.8472	-83.3003	736593	10024-66-5	10024665	CASRN	The Andersons Inc.	1947 Briarfield Blvd	P.O. Box 119	Maumee	Lucas	OH	43537	19-699-1731									THE ANDERSONS UPPER SANDUSKY TERMINAL	9841 COUNTY HIGHWAY 49		UPPER SANDUSKY	WYANDOT	OH	43351	19-699-1731	TSCA124106	110006000000	325314 Fertilizer (Mixing Only) Manufacturing	Manufacture					Manufacture	CBI	0	CBI	CBI	CBI	CBI	<1,000,000	<1,000,000	<1,000,000	<1,000,000
1,2,3-Propanetricarboxylic acid, 2-hydroxy-, potassium salt (1:1)	41.4885	-88.1495	729203	866-83-1	866831	CASRN	Ecolab Inc	1 Ecolab Place		St. Paul	Ramsey	MN	55102	00-615-4611									ECOLAB INC	3001 CHANNAHON RD.		JOLIET	WILL COUNTY	IL	60436-9581	06-438-5701	100605681	110000000000	325611 Soap And Other Detergent Manufacturing	Both					Manufacture	40658	0	40658	33613	35956	10931	78455	52372	93017	61601
1,2,3-Propanetricarboxylic acid, 2-hydroxy-, potassium salt (1:1)	42.4658	-83.0354	709559	866-83-1	866831	CASRN	HENKEL CORPORATION	1 HENKEL WAY		ROCKY HILL	Hartford	CT	6067	08-088-7708									HENKEL WARREN	23343 SHERWOOD AVE		WARREN	MACOMB COUNTY	MI	48091	06-729-7990	TSCA115421	110068000000	325520 Adhesive Manufacturing	Both					Manufacture	37797	0	37797	18759	57061	50670	78455	52372	93017	61601
1,2,3-Propanetricarboxylic acid, 2-hydroxy-, potassium salt (1:2)	39.4153	-77.9001	717281	3609-96-9	3609969	CASRN	Ecolab Inc	1 Ecolab Place		St. Paul	Ramsey	MN	55102	00-615-4611									ECOLAB INC	942 BAKER ROAD		MARTINSBURG	BERKELEY COUNTY	WV	25405-9436	00-821-9912	100605680	110006000000	325611 Soap And Other Detergent Manufacturing	Manufacture					Manufacture	39895	0	39895	35725	21825	9785	<1,000,000	<1,000,000	<1,000,000	<1,000,000
1,2,3-Propanetricarboxylic acid, 2-hydroxy-, potassium salt (1:2)	41.4885	-88.1495	729178	3609-96-9	3609969	CASRN	Ecolab Inc	1 Ecolab Place		St. Paul	Ramsey	MN	55102	00-615-4611									ECOLAB INC	3001 CHANNAHON RD.		JOLIET	WILL COUNTY	IL	60436-9581	06-438-5701	100605681	110000000000	325611 Soap And Other Detergent Manufacturing	Both					Manufacture	48647	0	48647	34881	37605	12002	<1,000,000	<1,000,000	<1,000,000	<1,000,000
1,2,3-Propanetricarboxylic acid, 2-hydroxy-, potassium salt (1:3)	32.7069	-96.7499	741108	866-84-2	866842	CASRN	VERSUM MATERIALS INC	8555 South River Parkway		Tempe	Maricopa	AZ	85284	08-007-4232	MERCK KGAA	Frankfurter Strasse 250		Darmstadt		64293	GM	34-224-9299	VERSUM MATERIALS US, LLC DALLAS	8201 S CENTRAL EXPY		DALLAS	DALLAS COUNTY	TX	75241-7819	08-040-1991	TSCA10057450	110070000000	325998 All Other Miscellaneous Chemical Product And Preparation Manufacturing	Manufacture					Manufacture	CBI	CBI	CBI	CBI	CBI	CBI	1,000,000 ‚Äì <10,000,000	1,000,000 ‚Äì <10,000,000	1,000,000 ‚Äì <20,000,000	1,000,000 ‚Äì <20,000,000
1,2,3-Propanetricarboxylic acid, 2-hydroxy-, potassium salt (1:3)	36.3438	-119.376	712377	866-84-2	866842	CASRN	HYDRITE CHEMICAL CO.	300 N. PATRICK BLVD.		BROOKFIELD	Waukesha	WI	53045	00-643-5887									HYDRITE CHEMICAL CO.	1603 CLANCY CT.		VISALIA	TULARE	CA	93291	02-922-0619	100606433	110025000000	325180 Other Basic Inorganic Chemical Manufacturing	Manufacture	325199 All Other Basic Organic Chemical Manufacturing	Manufacture			Manufacture	173527	0	173527	0	0	0	1,000,000 ‚Äì <10,000,000	1,000,000 ‚Äì <10,000,000	1,000,000 ‚Äì <20,000,000	1,000,000 ‚Äì <20,000,000
1,2,3-Propanetricarboxylic acid, 2-hydroxy-, potassium salt (1:3)	38.4991	-89.1358	741884	866-84-2	866842	CASRN	HAWKINS, INC.	2381 Rosegate		Roseville	Ramsey	MN	55113	04-119-9639									HAWKINS INC - CENTRALIA	1 CAHILL DRIVE		CENTRALIA	MARION COUNTY	IL	62801	02-561-0392	TSCA4600	110060000000	325199 All Other Basic Organic Chemical Manufacturing	Both					Manufacture	95030	0	95030	31634	0	12184	1,000,000 ‚Äì <10,000,000	1,000,000 ‚Äì <10,000,000	1,000,000 ‚Äì <20,000,000	1,000,000 ‚Äì <20,000,000
1,2,3-Propanetricarboxylic acid, 2-hydroxy-, potassium salt (1:3)	39.8483	-88.9276	723857	866-84-2	866842	CASRN	TATE & LYLE INGREDIENTS AMERICAS LLC	2200 EAST ELDORADO STREET		DECATUR	Macon	IL	62521	12-232-0559									TATE & LYLE INGREDIENTS AMERICAS LLC	2200 EAST ELDORADO STREET		DECATUR	MACON	IL	62521	12-232-0559	TSCA7418	110001000000	311221 Wet Corn Milling	Manufacture					Import	CBI	CBI	CBI	0	0	0	1,000,000 ‚Äì <10,000,000	1,000,000 ‚Äì <10,000,000	1,000,000 ‚Äì <20,000,000	1,000,000 ‚Äì <20,000,000
1,2,3-Propanetricarboxylic acid, 2-hydroxy-, potassium salt (1:3)	42.2923	-71.1988	729737	866-84-2	866842	CASRN	JUNGBUNZLAUER INC	95 WELLS AVENUE	Suite 150	NEWTON	Middlesex	MA	2459	09-586-4101	JUNGBUNZLAUER HOLDING AG	St. Alban-Vorstadt 90		Basel		4002	SZ	48-236-6101	JUNGBUNZLAUER, INC.	95 WELLS AVENUE		NEWTON CENTRE	MIDDLESEX COUNTY	MA	02459-3261	09-586-4104	TSCA4614	110040000000	325199 All Other Basic Organic Chemical Manufacturing	Import					Import	0	569889	569889	253970	291834	254356	1,000,000 ‚Äì <10,000,000	1,000,000 ‚Äì <10,000,000	1,000,000 ‚Äì <20,000,000	1,000,000 ‚Äì <20,000,000
1,2,3-Propanetricarboxylic acid, 2-hydroxy-, potassium salt (1:3)	42.5379	-92.368	708546	866-84-2	866842	CASRN	HYDRITE CHEMICAL CO.	300 N. PATRICK BLVD.		BROOKFIELD	Waukesha	WI	53045	00-643-5887									HYDRITE CHEMICAL CO.	2815 WCF&N DRIVE		WATERLOO	BLACK HAWK COUNTY	IA	50703-9612	05-721-3316	TSCA5179	110001000000	325180 Other Basic Inorganic Chemical Manufacturing	Manufacture	325199 All Other Basic Organic Chemical Manufacturing	Manufacture			Manufacture	133311	0	133311	0	0	0	1,000,000 ‚Äì <10,000,000	1,000,000 ‚Äì <10,000,000	1,000,000 ‚Äì <20,000,000	1,000,000 ‚Äì <20,000,000
1,2,3-Propanetricarboxylic acid, 2-hydroxy-, potassium salt (1:3)	43.9856	-88.5414	708377	866-84-2	866842	CASRN	HYDRITE CHEMICAL CO.	300 N. PATRICK BLVD.		BROOKFIELD	Waukesha	WI	53045	00-643-5887									HYDRITE CHEMICAL CO.	191 W. 28TH AVE.		OSHKOSH	WINNEBAGO COUNTY	WI	54902	12-405-5757	TSCA5115	110001000000	325180 Other Basic Inorganic Chemical Manufacturing	Manufacture	325199 All Other Basic Organic Chemical Manufacturing	Manufacture			Manufacture	1157629	0	1157629	1031041	1204150	1183455	1,000,000 ‚Äì <10,000,000	1,000,000 ‚Äì <10,000,000	1,000,000 ‚Äì <20,000,000	1,000,000 ‚Äì <20,000,000
1,2,3-Propanetricarboxylic acid, 2-hydroxy-, potassium salt (1:?)	27.9459	-82.4581	728377	7778-49-6	7778496	CASRN	Yara North America	100 North Tampa Street	Suite 3200	Tampa	Hillsborough	FL	33602	79-516-3518									YARA NORTH AMERICA-CORPORATE OFFICE	100 NORTH TAMPA STREET, SUITE 3200		TAMPA		FL	33602	79-516-3518	100600138	110057000000	424910 Farm Supplies Merchant Wholesalers	Import					Import	0	527	527	6	0	0	121398	90823	126343	32804
1,2,3-Propanetricarboxylic acid, 2-hydroxy-, potassium salt (1:?)	36.3438	-119.376	712375	7778-49-6	7778496	CASRN	HYDRITE CHEMICAL CO.	300 N. PATRICK BLVD.		BROOKFIELD	Waukesha	WI	53045	00-643-5887									HYDRITE CHEMICAL CO.	1603 CLANCY CT.		VISALIA	TULARE	CA	93291	02-922-0619	100606433	110025000000	325180 Other Basic Inorganic Chemical Manufacturing	Manufacture	325199 All Other Basic Organic Chemical Manufacturing	Manufacture			Manufacture	70670	0	70670	33440	0	0	121398	90823	126343	32804
1,2,3-Propanetricarboxylic acid, 2-hydroxy-, potassium salt (1:?)	41.4885	-88.1495	729201	7778-49-6	7778496	CASRN	Ecolab Inc	1 Ecolab Place		St. Paul	Ramsey	MN	55102	00-615-4611									ECOLAB INC	3001 CHANNAHON RD.		JOLIET	WILL COUNTY	IL	60436-9581	06-438-5701	100605681	110000000000	325611 Soap And Other Detergent Manufacturing	Both					Manufacture	50201	0	50201	57377	76739	32804	121398	90823	126343	32804
1,2,3-Propanetricarboxylic acid, 2-hydroxy-, potassium salt (1:?)	42.5379	-92.368	708542	7778-49-6	7778496	CASRN	HYDRITE CHEMICAL CO.	300 N. PATRICK BLVD.		BROOKFIELD	Waukesha	WI	53045	00-643-5887									HYDRITE CHEMICAL CO.	2815 WCF&N DRIVE		WATERLOO	BLACK HAWK COUNTY	IA	50703-9612	05-721-3316	TSCA5179	110001000000	325180 Other Basic Inorganic Chemical Manufacturing	Manufacture	325199 All Other Basic Organic Chemical Manufacturing	Manufacture				0	0	0	0	49604	0	121398	90823	126343	32804
1,2,3-Propanetricarboxylic acid, 2-hydroxy-, sodium salt (1:1)	32.9806	-96.851	713587	18996-35-5	18996355	CASRN	Ecolab Inc	1 Ecolab Place		St. Paul	Ramsey	MN	55102	00-615-4611									CENTURY PRODUCTS INC	2901 BELMEADE DRIVE		CARROLLTON	DALLAS COUNTY	TX	75006-2315	00-323-7021	100605156	110000000000	325611 Soap And Other Detergent Manufacturing	Manufacture					Manufacture	208398	0	208398	223775	203937	184076	1,000,000 ‚Äì <10,000,000	1,000,000 ‚Äì <10,000,000	1,000,000 ‚Äì <10,000,000	1,000,000 ‚Äì <10,000,000
1,2,3-Propanetricarboxylic acid, 2-hydroxy-, sodium salt (1:1)	33.4251	-84.1499	716131	18996-35-5	18996355	CASRN	Ecolab Inc	1 Ecolab Place		St. Paul	Ramsey	MN	55102	00-615-4611									ECOLAB INC	261 HWY. 155 S.		MCDONOUGH	HENRY COUNTY	GA	30253-6635	06-142-3778	100605678	110001000000	325611 Soap And Other Detergent Manufacturing	Both					Manufacture	183634	0	183634	525646	592828	233534	1,000,000 ‚Äì <10,000,000	1,000,000 ‚Äì <10,000,000	1,000,000 ‚Äì <10,000,000	1,000,000 ‚Äì <10,000,000
1,2,3-Propanetricarboxylic acid, 2-hydroxy-, sodium salt (1:1)	33.9971	-117.903	716363	18996-35-5	18996355	CASRN	Ecolab Inc	1 Ecolab Place		St. Paul	Ramsey	MN	55102	00-615-4611									ECOLAB INC.	18383 E. RAILROAD ST.		CITY OF INDUSTRY	LOS ANGELES COUNTY	CA	91748-1218	03-084-1597	100605683	110022000000	325611 Soap And Other Detergent Manufacturing	Manufacture					Manufacture	23345	0	23345	52170	49841	27541	1,000,000 ‚Äì <10,000,000	1,000,000 ‚Äì <10,000,000	1,000,000 ‚Äì <10,000,000	1,000,000 ‚Äì <10,000,000
1,2,3-Propanetricarboxylic acid, 2-hydroxy-, sodium salt (1:1)	35.1968	-80.7934	723116	18996-35-5	18996355	CASRN	Clariant Corporation	4000 Monroe Rd		Charlotte	Mecklenburg	NC	28205	10-870-6425	CLARIANT INTERNATIONAL LTD	Rothausstrasse 61	CH 4132	Muttenz			SZ	48-237-6084	CLARIANT PLASTICS & COATINGS USA LLC	4000 MONROE RD		CHARLOTTE	MECKLENBURG COUNTY	NC	28205	19-480-0793	TSCA10036911	110069000000	325130 Synthetic Dye And Pigment Manufacturing	Withheld	325991 Custom Compounding Of Purchased Resins	Withheld			CBI	CBI	CBI	CBI	CBI	CBI	CBI	1,000,000 ‚Äì <10,000,000	1,000,000 ‚Äì <10,000,000	1,000,000 ‚Äì <10,000,000	1,000,000 ‚Äì <10,000,000
1,2,3-Propanetricarboxylic acid, 2-hydroxy-, sodium salt (1:1)	36.0973	-79.9889	714616	18996-35-5	18996355	CASRN	Ecolab Inc	1 Ecolab Place		St. Paul	Ramsey	MN	55102	00-615-4611									KAY CHEMICAL COMPANY	8300 CAPITAL DR.		GREENSBORO	GUILFORD	NC	274099790	00-323-7021	TSCA6814	110000000000	325611 Soap And Other Detergent Manufacturing	Both					Both	289459	35	289494	388016	365817	371461	1,000,000 ‚Äì <10,000,000	1,000,000 ‚Äì <10,000,000	1,000,000 ‚Äì <10,000,000	1,000,000 ‚Äì <10,000,000
1,2,3-Propanetricarboxylic acid, 2-hydroxy-, sodium salt (1:1)	42.2923	-71.1988	729728	18996-35-5	18996355	CASRN	JUNGBUNZLAUER INC	95 WELLS AVENUE	Suite 150	NEWTON	Middlesex	MA	2459	09-586-4101	JUNGBUNZLAUER HOLDING AG	St. Alban-Vorstadt 90		Basel		4002	SZ	48-236-6101	JUNGBUNZLAUER, INC.	95 WELLS AVENUE		NEWTON CENTRE	MIDDLESEX COUNTY	MA	02459-3261	09-586-4104	TSCA4614	110040000000	325199 All Other Basic Organic Chemical Manufacturing	Import					Import	0	1030232	1030232	895068	823759	940747	1,000,000 ‚Äì <10,000,000	1,000,000 ‚Äì <10,000,000	1,000,000 ‚Äì <10,000,000	1,000,000 ‚Äì <10,000,000
1,2,3-Propanetricarboxylic acid, 2-hydroxy-, sodium salt (1:2)	41.4885	-88.1495	729168	144-33-2	144332	CASRN	Ecolab Inc	1 Ecolab Place		St. Paul	Ramsey	MN	55102	00-615-4611									ECOLAB INC	3001 CHANNAHON RD.		JOLIET	WILL COUNTY	IL	60436-9581	06-438-5701	100605681	110000000000	325611 Soap And Other Detergent Manufacturing	Both					Manufacture	6388	0	6388	33573	33674	18532	6388	33573	33674	18532
1,2,3-Propanetricarboxylic acid, 2-hydroxy-, sodium salt (1:3)	29.6089	-95.0534	714755	68-04-2	68042	CASRN	Avantor Inc	Building One Suite 200	100 Matsonford Rd	Radnor	Delaware	PA	19087	08-098-8180									AVANTOR PERFORMANCE MATERIALS PARIS KY PLANT	7001 MARTIN LUTHER KING JR BLVD		PARIS	BOURBON	KY	40361	08-475-8069	TSCA78864	110057000000	325180 Other Basic Inorganic Chemical Manufacturing	Import	423490 Other Professional Equipment And Supplies Merchant Wholesalers	Import	334516 Analytical Laboratory Instrument Manufacturing	Import	Import	CBI	CBI	CBI	CBI	CBI	CBI	50,000,000 ‚Äì <100,000,000	100,000,000 ‚Äì <1,000,000,000	10,000,000 ‚Äì <50,000,000	10,000,000 ‚Äì <50,000,000
1,2,3-Propanetricarboxylic acid, 2-hydroxy-, sodium salt (1:3)	29.6461	-95.0939	735314	68-04-2	68042	CASRN	HARCROS CHEMICALS	5200 SPEAKER ROAD		KANSAS CITY	Wyandotte	KS	66106	08-016-6983									HARCROS CHEMICALS INC	4606 NEW W DR		PASADENA	HARRIS COUNTY	TX	77507-1886	06-808-1033	TSCA6254	110021000000	424690 Other Chemical And Allied Products Merchant Wholesalers	Import									0	0	38808	50,000,000 ‚Äì <100,000,000	100,000,000 ‚Äì <1,000,000,000	10,000,000 ‚Äì <50,000,000	10,000,000 ‚Äì <50,000,000
1,2,3-Propanetricarboxylic acid, 2-hydroxy-, sodium salt (1:3)	31.3679	-92.4099	706702	68-04-2	68042	CASRN	THE PROCTER & GAMBLE COMPANY	2 P&G Plaza		CINCINNATI	HAMILTON	OH	45202	00-131-6827									PROCTER & GAMBLE MANUFACTURING CO ALEXANDRIA PLANT	3701 MONROE HIGHWAY		PINEVILLE		LA	71360-4198	05-748-8736	TSCA9506	110000000000	325611 Soap And Other Detergent Manufacturing	Manufacture	325613 Surface Active Agent Manufacturing				Manufacture	CBI	0	CBI	CBI	CBI	CBI	50,000,000 ‚Äì <100,000,000	100,000,000 ‚Äì <1,000,000,000	10,000,000 ‚Äì <50,000,000	10,000,000 ‚Äì <50,000,000
1,2,3-Propanetricarboxylic acid, 2-hydroxy-, sodium salt (1:3)	33.0458	-117.284	719843	68-04-2	68042	CASRN	Valudor Products, LLC	179 Calle Magdelena	Suite 100	Encinitas	San Diego	CA	92024	06-877-7257									VALUDOR PRODUCTS	179 CALLE MAGDALENA	SUITE 100	ENCINITAS	SAN DIEGO COUNTY	CA	92024	06-877-7257	TSCA10099039	110071000000	424690 Other Chemical And Allied Products Merchant Wholesalers	Import	424910 Farm Supplies Merchant Wholesalers	Import			Import	CBI	CBI	CBI	CBI	CBI	CBI	50,000,000 ‚Äì <100,000,000	100,000,000 ‚Äì <1,000,000,000	10,000,000 ‚Äì <50,000,000	10,000,000 ‚Äì <50,000,000
1,2,3-Propanetricarboxylic acid, 2-hydroxy-, sodium salt (1:3)	33.8291	-118.16	717931	68-04-2	68042	CASRN	Redox Inc	3960 Paramount Blvd	Suite 107	Lakewood	Los Angeles	CA	90712	07-735-9911									REDOX INC	3960 PARAMOUNT BLVD	SUITE 107	LAKEWOOD	LOS ANGELES COUNTY	CA	90712	07-735-9911	TSCA10072879	110071000000	424690 Other Chemical And Allied Products Merchant Wholesalers	Import					Import	CBI	CBI	CBI	CBI	CBI	CBI	50,000,000 ‚Äì <100,000,000	100,000,000 ‚Äì <1,000,000,000	10,000,000 ‚Äì <50,000,000	10,000,000 ‚Äì <50,000,000
1,2,3-Propanetricarboxylic acid, 2-hydroxy-, sodium salt (1:3)	33.8777	-84.7079	727341	68-04-2	68042	CASRN	HARCROS CHEMICALS	5200 SPEAKER ROAD		KANSAS CITY	Wyandotte	KS	66106	08-016-6983									HARCROS CHEMICALS INC	4030 FAMBROUGH DRIVE		POWDER SPRINGS	COBB COUNTY	GA	30127-5338	10-200-8976	100600820	110001000000	424690 Other Chemical And Allied Products Merchant Wholesalers	Import									77176	0	0	50,000,000 ‚Äì <100,000,000	100,000,000 ‚Äì <1,000,000,000	10,000,000 ‚Äì <50,000,000	10,000,000 ‚Äì <50,000,000
1,2,3-Propanetricarboxylic acid, 2-hydroxy-, sodium salt (1:3)	33.8955	-84.7989	736565	68-04-2	68042	CASRN	UNIVAR SOLUTIONS INC.	3075 Highland Pkwy., Ste. 200		Downers Grove	DuPage	IL	60515-5560	09-887-7053									UNIVAR SOLUTIONS USA INC. - DALLAS, GA	448 CADILLAC PKWY		DALLAS	PAULDING COUNTY	GA	30157	16-710-9508	TSCA119701	110063000000	424690 Other Chemical And Allied Products Merchant Wholesalers	Both					Manufacture	1395090	0	1395090	1192295	1128457	3231740	50,000,000 ‚Äì <100,000,000	100,000,000 ‚Äì <1,000,000,000	10,000,000 ‚Äì <50,000,000	10,000,000 ‚Äì <50,000,000
1,2,3-Propanetricarboxylic acid, 2-hydroxy-, sodium salt (1:3)	34.6967	-84.9846	724190	68-04-2	68042	CASRN	HARCROS CHEMICALS	5200 SPEAKER ROAD		KANSAS CITY	Wyandotte	KS	66106	08-016-6983									HARCROS CHEMICALS, INC.	3452 CORPORATE DRIVE		DALTON		GA	30720	06-283-1962	TSCA5384	110044000000	325188 All Other Basic Inorganic Chemical Manufacturing	Both	325998 All Other Miscellaneous Chemical Product And Preparation Manufacturing	Both							0	0	67529	50,000,000 ‚Äì <100,000,000	100,000,000 ‚Äì <1,000,000,000	10,000,000 ‚Äì <50,000,000	10,000,000 ‚Äì <50,000,000
1,2,3-Propanetricarboxylic acid, 2-hydroxy-, sodium salt (1:3)	34.7703	-82.2995	728280	68-04-2	68042	CASRN	BASF CORPORATION	100 Park Ave		Florham Park	Morris	NJ	7932	00-130-7032	BASF SE	Carl-Bosch-Str-38		Ludwigshafen		67056	GM	31-500-0554	BASF CORP	1520 OLD STAGE RD		MAULDIN	GREENVILLE COUNTY	SC	29662	05-874-5894	TSCA123562	110070000000	325613 Surface Active Agent Manufacturing	Withheld					CBI	CBI	CBI	CBI	CBI	0	CBI	50,000,000 ‚Äì <100,000,000	100,000,000 ‚Äì <1,000,000,000	10,000,000 ‚Äì <50,000,000	10,000,000 ‚Äì <50,000,000
1,2,3-Propanetricarboxylic acid, 2-hydroxy-, sodium salt (1:3)	35.0878	-80.9599	740193	68-04-2	68042	CASRN	Diversey, Inc.	1300 Altura Rd	Suite 125	Fort Mill	York	SC	29708	01-824-0817									DIVERSEY, INC.	1300 ALTURA RD	SUITE 125	FORT MILL	YORK COUNTY	SC	29708	01-824-0817	TSCA10057935	110071000000	325611 Soap And Other Detergent Manufacturing	Import					Import	0	63821	63821	37191	34739	28858	50,000,000 ‚Äì <100,000,000	100,000,000 ‚Äì <1,000,000,000	10,000,000 ‚Äì <50,000,000	10,000,000 ‚Äì <50,000,000
1,2,3-Propanetricarboxylic acid, 2-hydroxy-, sodium salt (1:3)	35.9366	-80.0334	713843	68-04-2	68042	CASRN	PIEDMONT CHEMICAL INDUSTRIES I, LLC	331 BURTON AVENUE		HIGH POINT	Guilford	NC	27262	00-321-5799									PIEDMONT CHEMICAL INDUSTRIES I LLC	331 BURTON AVENUE		HIGH POINT	GUILFORD	NC	27262-8071	00-321-5799	TSCA6207	110000000000	325199 All Other Basic Organic Chemical Manufacturing	Manufacture						0	0	0	0	25935	0	50,000,000 ‚Äì <100,000,000	100,000,000 ‚Äì <1,000,000,000	10,000,000 ‚Äì <50,000,000	10,000,000 ‚Äì <50,000,000
1,2,3-Propanetricarboxylic acid, 2-hydroxy-, sodium salt (1:3)	36.0973	-79.9889	714623	68-04-2	68042	CASRN	Ecolab Inc	1 Ecolab Place		St. Paul	Ramsey	MN	55102	00-615-4611									KAY CHEMICAL COMPANY	8300 CAPITAL DR.		GREENSBORO	GUILFORD	NC	274099790	00-323-7021	TSCA6814	110000000000	325611 Soap And Other Detergent Manufacturing	Both					Import	0	182000	182000	137560	133320	156600	50,000,000 ‚Äì <100,000,000	100,000,000 ‚Äì <1,000,000,000	10,000,000 ‚Äì <50,000,000	10,000,000 ‚Äì <50,000,000
1,2,3-Propanetricarboxylic acid, 2-hydroxy-, sodium salt (1:3)	38.4991	-89.1358	741874	68-04-2	68042	CASRN	HAWKINS, INC.	2381 Rosegate		Roseville	Ramsey	MN	55113	04-119-9639									HAWKINS INC - CENTRALIA	1 CAHILL DRIVE		CENTRALIA	MARION COUNTY	IL	62801	02-561-0392	TSCA4600	110060000000	325199 All Other Basic Organic Chemical Manufacturing	Both					Manufacture	8083928	0	8083928	6328833	4664033	4582587	50,000,000 ‚Äì <100,000,000	100,000,000 ‚Äì <1,000,000,000	10,000,000 ‚Äì <50,000,000	10,000,000 ‚Äì <50,000,000
1,2,3-Propanetricarboxylic acid, 2-hydroxy-, sodium salt (1:3)	38.5194	-86.6233	738305	68-04-2	68042	CASRN	The Clorox Company	1221 Broadway		Oakland	Alameda	CA	94612-1871	00-913-8033									AHF INDUSTRIES, INC. DBA PLUTO CORP.	8647 W S R # 56		FRENCH LICK	ORANGE COUNTY	IN	47432	00-423-6071	TSCA112801	110038000000	325611 Soap And Other Detergent Manufacturing	Manufacture						CBI	0	CBI	CBI	CBI	CBI	50,000,000 ‚Äì <100,000,000	100,000,000 ‚Äì <1,000,000,000	10,000,000 ‚Äì <50,000,000	10,000,000 ‚Äì <50,000,000
1,2,3-Propanetricarboxylic acid, 2-hydroxy-, sodium salt (1:3)	39.8483	-88.9276	723854	68-04-2	68042	CASRN	TATE & LYLE INGREDIENTS AMERICAS LLC	2200 EAST ELDORADO STREET		DECATUR	Macon	IL	62521	12-232-0559									TATE & LYLE INGREDIENTS AMERICAS LLC	2200 EAST ELDORADO STREET		DECATUR	MACON	IL	62521	12-232-0559	TSCA7418	110001000000	311221 Wet Corn Milling	Manufacture					Import	CBI	CBI	CBI	0	0	0	50,000,000 ‚Äì <100,000,000	100,000,000 ‚Äì <1,000,000,000	10,000,000 ‚Äì <50,000,000	10,000,000 ‚Äì <50,000,000
1,2,3-Propanetricarboxylic acid, 2-hydroxy-, sodium salt (1:3)	40.7456	-84.0345	706720	68-04-2	68042	CASRN	THE PROCTER & GAMBLE COMPANY	2 P&G Plaza		CINCINNATI	Hamilton	OH	45202	00-131-6827									PROCTER & GAMBLE MANUFACTURING CO LIMA PLANT	3875 RESERVOIR ROAD		LIMA		OH	45801-3310	04-731-0107	TSCA9492	110002000000	325611 Soap And Other Detergent Manufacturing	Manufacture					Manufacture	CBI	0	CBI	CBI	CBI	CBI	50,000,000 ‚Äì <100,000,000	100,000,000 ‚Äì <1,000,000,000	10,000,000 ‚Äì <50,000,000	10,000,000 ‚Äì <50,000,000
1,2,3-Propanetricarboxylic acid, 2-hydroxy-, sodium salt (1:3)	40.8705	-74.4506	710148	68-04-2	68042	CASRN	RECKITT BENCKISER	399 INTERPACE PARKWAY		PARSIPPANY	Morris	NJ	7054	09-440-5024	RECKITT BENCKISER GROUP PLC	Turner House		Slough		SL1 3UH	UK	21-557-6498	RECKITT BENCKISER	399 INTERPACE PKWY		PARSIPPANY		NJ	7054	09-440-5024	TSCA10066040	110067000000	325611 Soap And Other Detergent Manufacturing	Both					Import	0	2902060	2902060	3150818	3593951	2124812	50,000,000 ‚Äì <100,000,000	100,000,000 ‚Äì <1,000,000,000	10,000,000 ‚Äì <50,000,000	10,000,000 ‚Äì <50,000,000
1,2,3-Propanetricarboxylic acid, 2-hydroxy-, sodium salt (1:3)	41.9365	-71.1293	703455	68-04-2	68042	CASRN	EMD Holding Corp	One Technology Place		Rockland	Plymounth	MA	2370	96-370-9014									EMD MILLIPORE CORP	530 JOHN HANCOCK RD	SUITE 100	TAUNTON	BRISTOL	MA	2780	07-878-4283	TSCA10058214	110045000000	325180 Other Basic Inorganic Chemical Manufacturing	Import	325414 Biological Product (Except Diagnostic) Manufacturing	Import	325199 All Other Basic Organic Chemical Manufacturing	Import	Import	CBI	CBI	CBI	CBI	CBI	CBI	50,000,000 ‚Äì <100,000,000	100,000,000 ‚Äì <1,000,000,000	10,000,000 ‚Äì <50,000,000	10,000,000 ‚Äì <50,000,000
1,2,3-Propanetricarboxylic acid, 2-hydroxy-, sodium salt (1:3)	42.2923	-71.1988	729731	68-04-2	68042	CASRN	JUNGBUNZLAUER INC	95 WELLS AVENUE	Suite 150	NEWTON	Middlesex	MA	2459	09-586-4101	JUNGBUNZLAUER HOLDING AG	St. Alban-Vorstadt 90		Basel		4002	SZ	48-236-6101	JUNGBUNZLAUER, INC.	95 WELLS AVENUE		NEWTON CENTRE	MIDDLESEX COUNTY	MA	02459-3261	09-586-4104	TSCA4614	110040000000	325199 All Other Basic Organic Chemical Manufacturing	Import					Import	0	7846077	7846077	7427242	7535997	2914757	50,000,000 ‚Äì <100,000,000	100,000,000 ‚Äì <1,000,000,000	10,000,000 ‚Äì <50,000,000	10,000,000 ‚Äì <50,000,000
1,2,3-Propanetricarboxylic acid, 2-hydroxy-, sodium salt (1:3)	42.3613	-83.1873	719603	68-04-2	68042	CASRN	PRESSURE VESSEL SERVICE, INC.	10900 HARPER AVENUE		DETROIT	WAYNE	MI	48213	00-653-0273									PVS NOLWOOD CHEMICALS INC	9000 HUBBELL AVENUE		DETROIT	WAYNE	MI	48228-2331	00-491-2309	100607665	110018000000	424690 Other Chemical And Allied Products Merchant Wholesalers	Both					Manufacture	663479	0	663479	751817	586382	551321	50,000,000 ‚Äì <100,000,000	100,000,000 ‚Äì <1,000,000,000	10,000,000 ‚Äì <50,000,000	10,000,000 ‚Äì <50,000,000
1,2,3-Propanetricarboxylic acid, 2-hydroxy-, sodium salt (1:3)	42.8812	-76.9817	737472	68-04-2	68042	CASRN	UNIVAR SOLUTIONS INC.	3075 Highland Pkwy., Ste. 200		Downers Grove	DuPage	IL	60515-5560	09-887-7053									UNIVAR SOLUTIONS USA INC GENEVA BRANCH	61 GATES AVE		GENEVA	ONTARIO COUNTY	NY	14456	04-140-1438	TSCA10057628	110001000000	424690 Other Chemical And Allied Products Merchant Wholesalers	Both					Manufacture	343482	0	343482	292765	117544	287613	50,000,000 ‚Äì <100,000,000	100,000,000 ‚Äì <1,000,000,000	10,000,000 ‚Äì <50,000,000	10,000,000 ‚Äì <50,000,000
1,2,3-Propanetricarboxylic acid, 2-hydroxy-, sodium salt (1:3)	44.9916	-93.2101	703733	68-04-2	68042	CASRN	HAWKINS, INC.	2381 Rosegate		Roseville	Ramsey	MN	55113	04-119-9639									HAWKINS INC	3100 E. HENNEPIN AVE.		MINNEAPOLIS	HENNEPIN	MN	55413	07-925-6342	100606274	110000000000	325180 Other Basic Inorganic Chemical Manufacturing	Both					Manufacture	3321210	0	3321210	4633638	622790	400337	50,000,000 ‚Äì <100,000,000	100,000,000 ‚Äì <1,000,000,000	10,000,000 ‚Äì <50,000,000	10,000,000 ‚Äì <50,000,000
1,2,3-Propanetricarboxylic acid, 2-hydroxy-, sodium salt (1:3)	47.6728	-122.107	738839	68-04-2	68042	CASRN	UNIVAR SOLUTIONS INC.	3075 Highland Pkwy., Ste. 200		Downers Grove	DuPage	IL	60515-5560	09-887-7053									UNIVAR SOLUTIONS USA INC	17411 NE UNION HILL RD.		REDMOND	KING COUNTY	WA	98052	10-297-1785	TSCA119921	110069000000	424690 Other Chemical And Allied Products Merchant Wholesalers	Import						0	0	0	0	1407692	1478400	50,000,000 ‚Äì <100,000,000	100,000,000 ‚Äì <1,000,000,000	10,000,000 ‚Äì <50,000,000	10,000,000 ‚Äì <50,000,000
1,2,3-Propanetricarboxylic acid, 2-hydroxy-, sodium salt (1:?)	30.0721	-90.5703	731296	994-36-5	994365	CASRN	CLARIANT CORPORATION	4000 MONROE RD		CHARLOTTE	Mecklenburg	NC	28205	10-870-6425	CLARIANT INTERNATIONAL LTD	Rothausstrasse 61	CH 4132	Muttenz			SZ	48-237-6084	CLARIANT CORPORATION RESERVE PLANT	334 ROSENWALD STREET		RESERVE	ST. JOHN THE BAPTIST PARISH	LA	70084-6920	18-552-7905	TSCA9519	110000000000	213112 Support Activities For Oil And Gas Operations	Manufacture	325998 All Other Miscellaneous Chemical Product And Preparation Manufacturing	Manufacture			Manufacture	33696	0	33696	39732	29174	0	<1,000,000	39732	29174	<1,000,000
1,2,3-Propanetricarboxylic acid, 2-hydroxy-, sodium salt (1:?)	34.7703	-82.2995	728295	994-36-5	994365	CASRN	BASF CORPORATION	100 Park Ave		Florham Park	Morris	NJ	7932	00-130-7032	BASF SE	Carl-Bosch-Str-38		Ludwigshafen		67056	GM	31-500-0554	BASF CORP	1520 OLD STAGE RD		MAULDIN	GREENVILLE COUNTY	SC	29662	05-874-5894	TSCA123562	110070000000	325613 Surface Active Agent Manufacturing	Withheld					CBI	CBI	CBI	CBI	0	0	CBI	<1,000,000	39732	29174	<1,000,000
1,2,3-Propanetricarboxylic acid, 2-hydroxy-, tripotassium salt, monohydrate	41.1369	-92.6452	716070	2000-05-06	6100056	CASRN	Cargill, Incorporated	15407 McGinty Road West		Wayzata	Hennepin	MN	55391	00-624-9189									CARGILL INC - EDDYVILLE IA	1 CARGILL DR		EDDYVILLE	MONROE COUNTY	IA	52553-5000	07-533-2598	TSCA10058339	110069000000	311221 Wet Corn Milling	Manufacture	325193 Ethyl Alcohol Manufacturing	Manufacture				0	0	0	CBI	CBI	CBI	0	<1,000,000	<1,000,000	<1,000,000
1,2,3-Propanetricarboxylic acid, 2-hydroxy-, trisodium salt, dihydrate	41.1369	-92.6452	716071	2032-04-03	6132043	CASRN	Cargill, Incorporated	15407 McGinty Road West		Wayzata	Hennepin	MN	55391	00-624-9189									CARGILL INC - EDDYVILLE IA	1 CARGILL DR		EDDYVILLE	MONROE COUNTY	IA	52553-5000	07-533-2598	TSCA10058339	110069000000	311221 Wet Corn Milling	Manufacture	325193 Ethyl Alcohol Manufacturing	Manufacture			Manufacture	CBI	0	CBI	CBI	CBI	CBI	1,000,000 ‚Äì <20,000,000	1,000,000 ‚Äì <20,000,000	1,000,000 ‚Äì <20,000,000	1,000,000 ‚Äì <20,000,000
1,2,3-Propanetriol	25.7893	-80.3551	707700	56-81-5	56815	CASRN	KG International	9800 NW 17th Street		Miami	Miami-Dade	FL	33172	10-195-1630									KG INTERNATIONAL	9800 NW 17TH ST		MIAMI	MIAMI-DADE COUNTY	FL	33172	10-195-1630	TSCA99782	110057000000	424690 Other Chemical And Allied Products Merchant Wholesalers	Import					Import	0	952008	952008	44100	396348	511560	1,000,000,000 ‚Äì <5,000,000,000	1,000,000,000 ‚Äì <5,000,000,000	1,000,000,000 ‚Äì <5,000,000,000	1,000,000,000 ‚Äì <5,000,000,000
1,2,3-Propanetriol	26.7133	-80.0516	714890	56-81-5	56815	CASRN	GREENCHEM INDUSTRIES LLC	222 CLEMATIS STREET	Suite 207	WEST PALM BEACH	Palm Beach	FL	33401	80-577-2717									GREENCHEM	222 CLEMATIS ST	SUITE 207	WEST PALM BEACH	PALM BEACH COUNTY	FL	33401	80-577-2717	TSCA124127	110070000000	424690 Other Chemical And Allied Products Merchant Wholesalers						Import	CBI	CBI	CBI	CBI	CBI	CBI	1,000,000,000 ‚Äì <5,000,000,000	1,000,000,000 ‚Äì <5,000,000,000	1,000,000,000 ‚Äì <5,000,000,000	1,000,000,000 ‚Äì <5,000,000,000
1,2,3-Propanetriol	29.5734	-95.2959	713931	56-81-5	56815	CASRN	SOLVCHEM, INC.	4704 SHANK ROAD		PEARLAND	Brazoria	TX	77581	06-802-4652									SOLVENTS & CHEMICALS	4704 SHANK RD.		PEARLAND	BRAZORIA	TX	77581	06-802-4652	100608001	110000000000	424690 Other Chemical And Allied Products Merchant Wholesalers	Both					Manufacture	4766	0	4766	3333	3905	50310	1,000,000,000 ‚Äì <5,000,000,000	1,000,000,000 ‚Äì <5,000,000,000	1,000,000,000 ‚Äì <5,000,000,000	1,000,000,000 ‚Äì <5,000,000,000
1,2,3-Propanetriol	29.6039	-95.0254	725568	56-81-5	56815	CASRN	REG	416 S. BELL AVENUE		AMES	Story	IA	50010	01-289-3898									REG HOUSTON LLC	11815 PORT RD		SEABROOK	HARRIS	TX	77586	01-508-1747	TSCA9051	110037000000	325199 All Other Basic Organic Chemical Manufacturing	Manufacture					Manufacture	31130776	0	31130776	31482567	18401782	22200336	1,000,000,000 ‚Äì <5,000,000,000	1,000,000,000 ‚Äì <5,000,000,000	1,000,000,000 ‚Äì <5,000,000,000	1,000,000,000 ‚Äì <5,000,000,000
1,2,3-Propanetriol	29.9601	-93.9278	721425	56-81-5	56815	CASRN	Renewable Biofuels Port Neches LLC	6501 Hogaboom Rd		Port Neches	Jefferson	TX	77651	93-063-1994									RENEWABLE BIOFUELS PORT NECHES LLC	6501 HOGABOOM RD		GROVES	JEFFERSON COUNTY	TX	77619	93-063-1994	TSCA10050759	110071000000	325199 All Other Basic Organic Chemical Manufacturing	Manufacture					Manufacture	187273860	0	187273860	52918143	47080161	40446906	1,000,000,000 ‚Äì <5,000,000,000	1,000,000,000 ‚Äì <5,000,000,000	1,000,000,000 ‚Äì <5,000,000,000	1,000,000,000 ‚Äì <5,000,000,000
1,2,3-Propanetriol	29.9814	-90.4548	741376	56-81-5	56815	CASRN	GALATA CHEMICALS LLC	471 HWY 3142		HAHNVILLE	SAINT CHARLES	LA	70057	96-275-3716									GALATA CHEMICALS LLC - GALATA TAFT FACIL	471 HWY 3142		HAHNVILLE	ST CHARLES	LA	70057	96-275-3716	TSCA5936	110001000000	325199 All Other Basic Organic Chemical Manufacturing	Both					Manufacture	CBI	CBI	CBI	CBI	CBI	CBI	1,000,000,000 ‚Äì <5,000,000,000	1,000,000,000 ‚Äì <5,000,000,000	1,000,000,000 ‚Äì <5,000,000,000	1,000,000,000 ‚Äì <5,000,000,000
1,2,3-Propanetriol	32.0961	-81.1235	706850	56-81-5	56815	CASRN	COLONIAL GROUP, INC.	PO BOX 576	101 North Lathrop Ave	SAVANNAH	Chatham	GA	31402	80-837-6735									COLONIAL CHEMICAL SOLUTIONS INC	916 W LATHROP		SAVANNAH		GA	31402	11-004-2897	TSCA7061	110019000000	424690 Other Chemical And Allied Products Merchant Wholesalers	Import					Import	0	10166067	10166067	6192254	388010	4151021	1,000,000,000 ‚Äì <5,000,000,000	1,000,000,000 ‚Äì <5,000,000,000	1,000,000,000 ‚Äì <5,000,000,000	1,000,000,000 ‚Äì <5,000,000,000
1,2,3-Propanetriol	32.6158	-96.7439	711235	56-81-5	56815	CASRN	BRENNTAG SOUTHWEST, INC., LANC	704 E. WINTERGREEN RD.		LANCASTER	Dallas	TX	75134	07-842-7532	BRENNTAG AG	Messeallee 11		Essen		45131	GM	50-709-1739	BRENNTAG SOUTHWEST INC LANC ASTER	704 E WINTERGREEN RD		LANCASTER	DALLAS	TX	75134	07-842-7532	TSCA10036072	110021000000	424690 Other Chemical And Allied Products Merchant Wholesalers										39683	79366	357147	1,000,000,000 ‚Äì <5,000,000,000	1,000,000,000 ‚Äì <5,000,000,000	1,000,000,000 ‚Äì <5,000,000,000	1,000,000,000 ‚Äì <5,000,000,000
1,2,3-Propanetriol	32.6953	-117.14	724837	56-81-5	56815	CASRN	BAKER COMMODITIES INC	4020 BANDINI BLVD		VERNON	LOS ANGELES	CA	90058	00-825-2496									NEW LEAF BIOFUEL, LLC	2285 NEWTON AVE		SAN DIEGO	SAN DIEGO	CA	92113	79-005-7603	TSCA9170	110057000000	325199 All Other Basic Organic Chemical Manufacturing	Manufacture					Manufacture	4440746	0	4440746	1022434	400720	87240	1,000,000,000 ‚Äì <5,000,000,000	1,000,000,000 ‚Äì <5,000,000,000	1,000,000,000 ‚Äì <5,000,000,000	1,000,000,000 ‚Äì <5,000,000,000
1,2,3-Propanetriol	32.7799	-97.344	731323	56-81-5	56815	CASRN	Valtris	7500 East Pleasantt Valley		Independence	cuyahoga	OH	44131	07-979-5537									POLYMER ADDITIVES INC	510 E CENTRAL AVE		FORT WORTH	TARRANT COUNTY	TX	76164	17-411-6483	TSCA95284	110067000000	325199 All Other Basic Organic Chemical Manufacturing	Both					Manufacture	CBI	CBI	CBI	CBI	CBI	CBI	1,000,000,000 ‚Äì <5,000,000,000	1,000,000,000 ‚Äì <5,000,000,000	1,000,000,000 ‚Äì <5,000,000,000	1,000,000,000 ‚Äì <5,000,000,000
1,2,3-Propanetriol	33.0091	-87.6247	724136	56-81-5	56815	CASRN	Hero BX - Moundville, Alabama	12982 Cherokee Bend Drive		Moundville	Tuscaloosa	AL	35474	08-015-8902									HERO BX - MOUNDVILLE, ALABAMA	12982 CHEROKEE BEND DR		MOUNDVILLE	TUSCALOOSA COUNTY	AL	35474	08-015-8902	TSCA10056218	110071000000	325199 All Other Basic Organic Chemical Manufacturing	Manufacture					Manufacture	CBI	0	CBI	CBI	CBI	CBI	1,000,000,000 ‚Äì <5,000,000,000	1,000,000,000 ‚Äì <5,000,000,000	1,000,000,000 ‚Äì <5,000,000,000	1,000,000,000 ‚Äì <5,000,000,000
1,2,3-Propanetriol	33.4627	-94.3249	725579	56-81-5	56815	CASRN	REG	416 S. BELL AVENUE		AMES	Story	IA	50010	01-289-3898									REG NEW BOSTON, LLC	280 TEXAS AVE NEW BOSTON TX 75570		NEW BOSTON	BOWIE COUNTY	TX	75570-7244	07-881-3929	TSCA9295	110060000000	325199 All Other Basic Organic Chemical Manufacturing	Manufacture					Manufacture	5370661	0	5370661	12239865	10555624	10979703	1,000,000,000 ‚Äì <5,000,000,000	1,000,000,000 ‚Äì <5,000,000,000	1,000,000,000 ‚Äì <5,000,000,000	1,000,000,000 ‚Äì <5,000,000,000
1,2,3-Propanetriol	33.8291	-118.16	717923	56-81-5	56815	CASRN	Redox Inc	3960 Paramount Blvd	Suite 107	Lakewood	Los Angeles	CA	90712	07-735-9911									REDOX INC	3960 PARAMOUNT BLVD	SUITE 107	LAKEWOOD	LOS ANGELES COUNTY	CA	90712	07-735-9911	TSCA10072879	110071000000	424690 Other Chemical And Allied Products Merchant Wholesalers	Import					Import	CBI	CBI	CBI	CBI	CBI	CBI	1,000,000,000 ‚Äì <5,000,000,000	1,000,000,000 ‚Äì <5,000,000,000	1,000,000,000 ‚Äì <5,000,000,000	1,000,000,000 ‚Äì <5,000,000,000
1,2,3-Propanetriol	33.8389	-84.3228	716083	56-81-5	56815	CASRN	McCullough & Associates	1746 Northeast Expressway NE		Atlanta	DeKalb	GA	30329	80-527-7068									MCCULLOUGH & ASSOCIATES	1746 NE EXPRESSWAY NE		ATLANTA	DEKALB COUNTY	GA	30329	80-527-7068	TSCA107101	110068000000	424690 Other Chemical And Allied Products Merchant Wholesalers	Import					Import	CBI	CBI	CBI	CBI	CBI	CBI	1,000,000,000 ‚Äì <5,000,000,000	1,000,000,000 ‚Äì <5,000,000,000	1,000,000,000 ‚Äì <5,000,000,000	1,000,000,000 ‚Äì <5,000,000,000
1,2,3-Propanetriol	33.8436	-118.216	721018	56-81-5	56815	CASRN	Solvay Holding Inc	504 Carnegie Center		Princeton	Mercer	NJ	8540	87-474-8937	SOLVAY SA	RUE DE RANSBEEK, 310	1120 Brussels	Brussels			BE	37-000-9086	MARCHEM TECHNOLOGIES LLC	20851 SOUTH SANTA FE AVENUE		LONG BEACH	LOS ANGELES	CA	90810-1130	13-136-1735	TSCA5841	110000000000	325199 All Other Basic Organic Chemical Manufacturing	Manufacture					Manufacture	CBI	0	CBI	CBI	CBI	CBI	1,000,000,000 ‚Äì <5,000,000,000	1,000,000,000 ‚Äì <5,000,000,000	1,000,000,000 ‚Äì <5,000,000,000	1,000,000,000 ‚Äì <5,000,000,000
1,2,3-Propanetriol	33.9923	-118.214	737777	56-81-5	56815	CASRN	NORMAN, FOX & CO.	14970 DON JULIAN ROAD		CITY OF INDUSTRY	LOS ANGELES	CA	91746	06-456-6961									NORMAN FOX & CO	5511 SOUTH BOYLE AVENUE		VERNON	LOS ANGELES COUNTY	CA	90058-3986	06-456-6961	100601183	110000000000	325611 Soap And Other Detergent Manufacturing	Both					Both	12378	319252	331630	132126	438960	684464	1,000,000,000 ‚Äì <5,000,000,000	1,000,000,000 ‚Äì <5,000,000,000	1,000,000,000 ‚Äì <5,000,000,000	1,000,000,000 ‚Äì <5,000,000,000
1,2,3-Propanetriol	33.9933	-83.765	723363	56-81-5	56815	CASRN	Solvay Holding Inc.	504 Carnegie Center		Princeton	Mercer	NJ	8540	87-474-8937	SOLVAY SA	RUE DE RANSBEEK, 310	1120 Brussels	Brussels			BE	37-000-9086	RHODIA INC	577 BANKHEAD HWY.		WINDER	BARROW	GA	30680	61-466-8598	TSCA4240	110000000000	325199 All Other Basic Organic Chemical Manufacturing	Manufacture					Manufacture	CBI	0	CBI	CBI	CBI	CBI	1,000,000,000 ‚Äì <5,000,000,000	1,000,000,000 ‚Äì <5,000,000,000	1,000,000,000 ‚Äì <5,000,000,000	1,000,000,000 ‚Äì <5,000,000,000
1,2,3-Propanetriol	34.025	-117.975	737829	56-81-5	56815	CASRN	NORMAN, FOX & CO.	14970 DON JULIAN ROAD		INDUSTRY	LOS ANGELES	CA	91746	06-456-6961									NORMAN FOX & CO	14970 DON JULIAN RD		INDUSTRY	LOS ANGELES COUNTY	CA	91746-3111	06-456-6961	TSCA8332	110042000000	424690 Other Chemical And Allied Products Merchant Wholesalers	Import					Import	0	7368736	7368736	8957801	12709915	7787865	1,000,000,000 ‚Äì <5,000,000,000	1,000,000,000 ‚Äì <5,000,000,000	1,000,000,000 ‚Äì <5,000,000,000	1,000,000,000 ‚Äì <5,000,000,000
1,2,3-Propanetriol	34.052	-117.627	713707	56-81-5	56815	CASRN	Wintersun International Inc	1250 E. Belmont St		Ontario	San Bernardino	CA	91761	06-817-8032									WINTERSUN CHEMICAL	1250 E. BELMONT ST.		ONTARIO	SAN BERNARDINO COUNTY	CA	91761	06-817-8032	TSCA79242	110064000000	422690 Other Chemical And Allied Products Wholesalers	Import					Import	0	1763680	1763680	308644	1058208	44092	1,000,000,000 ‚Äì <5,000,000,000	1,000,000,000 ‚Äì <5,000,000,000	1,000,000,000 ‚Äì <5,000,000,000	1,000,000,000 ‚Äì <5,000,000,000
1,2,3-Propanetriol	34.1463	-118.275	719760	56-81-5	56815	CASRN	A.G. LAYNE, INC.	4578 BRAZIL STREET		LOS ANGELES	Los Angeles	CA	90039	02-854-1696									A G LAYNE INCORPORATED	4578 BRAZIL ST.		LOS ANGELES	LOS ANGELES	CA	90039-1080	02-854-1696	TSCA112841	110000000000	424690 Other Chemical And Allied Products Merchant Wholesalers	Import					Import	0	127867	127867	0	0	0	1,000,000,000 ‚Äì <5,000,000,000	1,000,000,000 ‚Äì <5,000,000,000	1,000,000,000 ‚Äì <5,000,000,000	1,000,000,000 ‚Äì <5,000,000,000
1,2,3-Propanetriol	34.7703	-82.2995	728276	56-81-5	56815	CASRN	BASF CORPORATION	100 Park Ave		Florham Park	Morris	NJ	7932	00-130-7032	BASF SE	Carl-Bosch-Str-38		Ludwigshafen		67056	GM	31-500-0554	BASF CORP	1520 OLD STAGE RD		MAULDIN	GREENVILLE COUNTY	SC	29662	05-874-5894	TSCA123562	110070000000	325613 Surface Active Agent Manufacturing	Manufacture					Manufacture	CBI	CBI	CBI	CBI	CBI	CBI	1,000,000,000 ‚Äì <5,000,000,000	1,000,000,000 ‚Äì <5,000,000,000	1,000,000,000 ‚Äì <5,000,000,000	1,000,000,000 ‚Äì <5,000,000,000
1,2,3-Propanetriol	34.8096	-82.2351	731633	56-81-5	56815	CASRN	OLEON AMERICAS INC	200 BRYCE CIRCLE		SIMPSONVILLE	Greenville County	SC	29681	83-329-5368	OLEON NV	Assenedestraat 2		EVERGEM		9940	BE	37-014-0485	OLEON AMERICAS INC	200 BRYCE CIR		SIMPSONVILLE	GREENVILLE COUNTY	SC	29681	83-329-5368	TSCA89147	110067000000	424690 Other Chemical And Allied Products Merchant Wholesalers						Import	CBI	CBI	CBI	CBI	CBI	CBI	1,000,000,000 ‚Äì <5,000,000,000	1,000,000,000 ‚Äì <5,000,000,000	1,000,000,000 ‚Äì <5,000,000,000	1,000,000,000 ‚Äì <5,000,000,000
1,2,3-Propanetriol	34.9414	-82.0821	713043	56-81-5	56815	CASRN	STARCHEM LLC	10150 GREENVILLE HIGHWAY		WELLFORD	Spartanburg	SC	29385	79-029-8199									STARCHEM LLC	10150 GREENVILLE HIGHWAY		WELLFORD	SPARTANBURG	SC	29385-9528	79-029-8199	TSCA4902	110000000000	325199 All Other Basic Organic Chemical Manufacturing	Both					Manufacture	197035	0	197035	200094	79308	61136	1,000,000,000 ‚Äì <5,000,000,000	1,000,000,000 ‚Äì <5,000,000,000	1,000,000,000 ‚Äì <5,000,000,000	1,000,000,000 ‚Äì <5,000,000,000
1,2,3-Propanetriol	34.949	-80.9808	713471	56-81-5	56815	CASRN	Rudolf Venture Chemical	2199 Burkett Rd		Rock Hill	SC	SC	29730	87-268-5131	RUDOLF GMBH	Altvaterstr 58-64		GERETSRIED		82538	GM	31-557-8666	RUDOLF VENTURE CHEMICAL INC	2199 BURKETTE RD		ROCK HILL	YORK COUNTY	SC	29730	87-268-5131	TSCA9274	110038000000	325998 All Other Miscellaneous Chemical Product And Preparation Manufacturing	Manufacture					Import	0	6219	6219	1529	0	0	1,000,000,000 ‚Äì <5,000,000,000	1,000,000,000 ‚Äì <5,000,000,000	1,000,000,000 ‚Äì <5,000,000,000	1,000,000,000 ‚Äì <5,000,000,000
1,2,3-Propanetriol	34.9966	-85.6438	713522	56-81-5	56815	CASRN	COLONIAL CHEMICAL, INC	225 COLONIAL DRIVE		SOUTH PITTSBURG	Marion	TN	37380	01-435-7557									COLONIAL CHEMICAL INC.	225 COLONIAL DR		SOUTH PITTSBURG	MARION COUNTY	TN	37380	01-435-7557	TSCA10061699	110036000000	325199 All Other Basic Organic Chemical Manufacturing	Manufacture	325613 Surface Active Agent Manufacturing	Manufacture			Manufacture	402779	0	402779	440756	427513	379756	1,000,000,000 ‚Äì <5,000,000,000	1,000,000,000 ‚Äì <5,000,000,000	1,000,000,000 ‚Äì <5,000,000,000	1,000,000,000 ‚Äì <5,000,000,000
1,2,3-Propanetriol	35.0878	-80.9599	740181	56-81-5	56815	CASRN	Diversey, Inc.	1300 Altura Rd	Suite 125	Fort Mill	York	SC	29708	01-824-0817									DIVERSEY, INC.	1300 ALTURA RD	SUITE 125	FORT MILL	YORK COUNTY	SC	29708	01-824-0817	TSCA10057935	110071000000	325611 Soap And Other Detergent Manufacturing	Import					Import	0	82216	82216	52054	56359	17408	1,000,000,000 ‚Äì <5,000,000,000	1,000,000,000 ‚Äì <5,000,000,000	1,000,000,000 ‚Äì <5,000,000,000	1,000,000,000 ‚Äì <5,000,000,000
1,2,3-Propanetriol	35.1662	-89.9598	741531	56-81-5	56815	CASRN	PMC BIOGENIX, INC.	1231 POPE STREET		MEMPHIS	Shelby County	TN	38108	80-980-4979									PMC BIOGENIX INC	1231 POPE STREET		MEMPHIS		TN	38108-2535	80-980-4979	100603650	110000000000	325199 All Other Basic Organic Chemical Manufacturing						Manufacture	10049240	0	10049240	13580931	14685505	16918575	1,000,000,000 ‚Äì <5,000,000,000	1,000,000,000 ‚Äì <5,000,000,000	1,000,000,000 ‚Äì <5,000,000,000	1,000,000,000 ‚Äì <5,000,000,000
1,2,3-Propanetriol	35.1975	-80.7925	731128	56-81-5	56815	CASRN	CLARIANT CORPORATION	4000 MONROE RD		CHARLOTTE	Mecklenburg	NC	28205	10-870-6425	CLARIANT INTERNATIONAL LTD	Rothausstrasse 61	CH 4132	Muttenz			SZ	48-237-6084	CLARIANT CORPORATION	4000 MONROE RD		CHARLOTTE		NC	28205	10-870-6425	200001020	110001000000	325188 All Other Basic Inorganic Chemical Manufacturing	Import	325199 All Other Basic Organic Chemical Manufacturing	Import			Import	CBI	CBI	CBI	CBI	CBI	CBI	1,000,000,000 ‚Äì <5,000,000,000	1,000,000,000 ‚Äì <5,000,000,000	1,000,000,000 ‚Äì <5,000,000,000	1,000,000,000 ‚Äì <5,000,000,000
1,2,3-Propanetriol	35.2221	-85.2188	715988	56-81-5	56815	CASRN	JK Group USA, Inc	106 Industrial Park Drive		Soddy Daisy	Hamilton	TN	37379	11-111-1111									JK GROUP USA, INC.	106 INDUSTRIAL PARK DR		SODDY DAISY	HAMILTON COUNTY	TN	37379	07-075-5354	TSCA10021013	110070000000	325910 Printing Ink Manufacturing	Import					Import	0	94825	94825	66060	51706	51777	1,000,000,000 ‚Äì <5,000,000,000	1,000,000,000 ‚Äì <5,000,000,000	1,000,000,000 ‚Äì <5,000,000,000	1,000,000,000 ‚Äì <5,000,000,000
1,2,3-Propanetriol	35.7259	-91.5199	734561	56-81-5	56815	CASRN	FUTUREFUEL CORPORATION	8235 Forsyth Boulevard, 4th Floor		Clayton	St. Louis	MO	63105	78-765-9460									FUTUREFUEL CHEMICAL CO	2800 GAP ROAD		BATESVILLE	INDEPENDENCE	AR	72501-8377	61-317-4684	100605968	110017000000	325199 All Other Basic Organic Chemical Manufacturing	Both	325320 Pesticide And Other Agricultural Chemical Manufacturing	Manufacture			Manufacture	CBI	0	CBI	CBI	CBI	CBI	1,000,000,000 ‚Äì <5,000,000,000	1,000,000,000 ‚Äì <5,000,000,000	1,000,000,000 ‚Äì <5,000,000,000	1,000,000,000 ‚Äì <5,000,000,000
1,2,3-Propanetriol	35.7702	-80.8425	732290	56-81-5	56815	CASRN	SANFORD, L.P.	6655 Peachtree Dunwoody Rd.		Sandy Springs	Fulton	GA	30328	00-506-7574									GEODIS	2203 SHERRILL DR		STATESVILLE	IREDELL	NC	28625	08-044-2935	TSCA10057332	110042000000	493110 General Warehousing And Storage	Import					Import	CBI	CBI	CBI	CBI	CBI	CBI	1,000,000,000 ‚Äì <5,000,000,000	1,000,000,000 ‚Äì <5,000,000,000	1,000,000,000 ‚Äì <5,000,000,000	1,000,000,000 ‚Äì <5,000,000,000
1,2,3-Propanetriol	35.9316	-78.8489	705292	56-81-5	56815	CASRN	SCM METAL PRODUCTS INC	2601 WECK DRIVE		DURHAM	Durham	NC	27712	17-558-4879									SCM METAL PRODUCTS, INC.	2601 WECK DR		DURHAM	DURHAM COUNTY	NC	27709	17-558-4879	TSCA122741	110000000000	331420 Copper Rolling, Drawing, Extruding, And Alloying	Both					Manufacture	196304	0	196304	268610	96993	259823	1,000,000,000 ‚Äì <5,000,000,000	1,000,000,000 ‚Äì <5,000,000,000	1,000,000,000 ‚Äì <5,000,000,000	1,000,000,000 ‚Äì <5,000,000,000
1,2,3-Propanetriol	37.4123	-122.149	720454	56-81-5	56815	CASRN	HP Inc.	1501 Page Mill Road		Palo Alto	Santa Clara	CA	94304	00-912-2532									HP INC.	1501 PAGE MILL RD		PALO ALTO	SANTA CLARA COUNTY	CA	94304	00-912-2532	TSCA118521	110069000000	325910 Printing Ink Manufacturing	Import					Import	CBI	CBI	CBI	CBI	CBI	CBI	1,000,000,000 ‚Äì <5,000,000,000	1,000,000,000 ‚Äì <5,000,000,000	1,000,000,000 ‚Äì <5,000,000,000	1,000,000,000 ‚Äì <5,000,000,000
1,2,3-Propanetriol	37.7105	-97.3294	736955	56-81-5	56815	CASRN	CARGILL, INC	15407 MCGINTY ROAD WEST	MS 62	WAYZATA	Hennepin	MN	55391	00-624-9189									CARGILL BIODIESEL	1534 NORTH BARWISE AVENUE		WICHITA	SEDGWICK COUNTY	KS	67214	06-292-4196	TSCA10057461	110070000000	311224 Soybean And Other Oilseed Processing	Manufacture	325199 All Other Basic Organic Chemical Manufacturing	Manufacture			Manufacture	CBI	0	CBI	CBI	CBI	CBI	1,000,000,000 ‚Äì <5,000,000,000	1,000,000,000 ‚Äì <5,000,000,000	1,000,000,000 ‚Äì <5,000,000,000	1,000,000,000 ‚Äì <5,000,000,000
1,2,3-Propanetriol	37.7846	-87.144	733939	56-81-5	56815	CASRN	OWENSBORO GRAIN BIODIESEL, LLC	P.O. BOX 1787		OWENSBORO	Daviess	KY	42302	00-194-7068									OWENSBORO GRAIN BIODIESEL LLC	1145 EWING RD		OWENSBORO	DAVIESS COUNTY	KY	42301	96-980-7473	TSCA4853	110001000000	311225 Fats And Oils Refining And Blending						Manufacture	CBI	0	CBI	CBI	CBI	CBI	1,000,000,000 ‚Äì <5,000,000,000	1,000,000,000 ‚Äì <5,000,000,000	1,000,000,000 ‚Äì <5,000,000,000	1,000,000,000 ‚Äì <5,000,000,000
1,2,3-Propanetriol	37.8329	-94.584	741099	56-81-5	56815	CASRN	ARCHER DANIELS MIDLAND COMPANY	4666 E FARIES PARKWAY		DECATUR	MACON	IL	62526	00-130-7586									DEERFIELD ENERGY LLC	17700 S T HWY	PO BOX 125	DEERFIELD	VERNON COUNTY	MO	64741	96-874-2671	TSCA10055885	110070000000	311224 Soybean And Other Oilseed Processing	Manufacture	325199 All Other Basic Organic Chemical Manufacturing	Manufacture			Manufacture	14000000	0	14000000	12000000	14000000	19000000	1,000,000,000 ‚Äì <5,000,000,000	1,000,000,000 ‚Äì <5,000,000,000	1,000,000,000 ‚Äì <5,000,000,000	1,000,000,000 ‚Äì <5,000,000,000
1,2,3-Propanetriol	38.5249	-121.403	706747	56-81-5	56815	CASRN	THE PROCTER & GAMBLE COMPANY	2 P&G Plaza		CINCINNATI	Hamilton	OH	45202	00-131-6827									PROCTER & GAMBLE MFG CO	8201 FRUITRIDGE ROAD		SACRAMENTO		CA	95826-4716	09-953-1683	TSCA9490	110017000000	325199 All Other Basic Organic Chemical Manufacturing	Manufacture					Manufacture	CBI	0	CBI	CBI	CBI	CBI	1,000,000,000 ‚Äì <5,000,000,000	1,000,000,000 ‚Äì <5,000,000,000	1,000,000,000 ‚Äì <5,000,000,000	1,000,000,000 ‚Äì <5,000,000,000
1,2,3-Propanetriol	38.9529	-77.3946	735062	56-81-5	56815	CASRN	Volkswagen Group of America Inc.	2200 Ferdinand Porsche Drive		Herndon	Fairfax	VA	20171	00-697-2475									VOLKSWAGEN GROUP OF AMERICA, INC	2200 FERDINAND PORSCHE DR		HERNDON	FAIRFAX COUNTY	VA	20171	00-697-2475	TSCA10041979	110071000000	336111 Automobile Manufacturing	Import	423120 Motor Vehicle Supplies And New Parts Merchant Wholesalers	Import			Import	0	35192	35192	35193	33019	35812	1,000,000,000 ‚Äì <5,000,000,000	1,000,000,000 ‚Äì <5,000,000,000	1,000,000,000 ‚Äì <5,000,000,000	1,000,000,000 ‚Äì <5,000,000,000
1,2,3-Propanetriol	39.0839	-84.5712	725518	56-81-5	56815	CASRN	Peter Cremer North America LP	3117 SOUTHSIDE AVE.		CINCINNATI	Hamilton	OH	45204	31-521-9907									PETER CREMER NORTH AMERICA LP	3117 SOUTHSIDE AVE		CINCINNATI	HAMILTON	OH	45204	09-208-5989	TSCA9062	110005000000	424690 Other Chemical And Allied Products Merchant Wholesalers	Import						0	0	0	97474	2205	6614	1,000,000,000 ‚Äì <5,000,000,000	1,000,000,000 ‚Äì <5,000,000,000	1,000,000,000 ‚Äì <5,000,000,000	1,000,000,000 ‚Äì <5,000,000,000
1,2,3-Propanetriol	39.1029	-84.5066	742018	56-81-5	56815	CASRN	THE PROCTER & GAMBLE COMPANY	2 P&G Plaza		CINCINNATI	Hamilton	OH	45202	00-131-6827									PROCTER & GAMBLE CO	1 PROCTER AND GAMBLE PLAZA		CINCINNATI		OH	45202-3393	00-131-6827	TSCA7054	110009000000	551114 Corporate, Subsidiary, And Regional Managing Offices	Withheld					CBI	CBI	CBI	CBI	CBI	CBI	CBI	1,000,000,000 ‚Äì <5,000,000,000	1,000,000,000 ‚Äì <5,000,000,000	1,000,000,000 ‚Äì <5,000,000,000	1,000,000,000 ‚Äì <5,000,000,000
1,2,3-Propanetriol	39.1199	-94.5573	737251	56-81-5	56815	CASRN	CARGILL, INC	15407 MCGINTY ROAD WEST	MS 62	WAYZATA	Hennepin	MN	55391	00-624-9189									CARGILL KANSAS CITY	2111 NICHOLSON AVE		KANSAS CITY	JACKSON COUNTY	MO	64120-1408	83-194-3241	TSCA10057459	110037000000	311224 Soybean And Other Oilseed Processing	Manufacture					Manufacture	CBI	0	CBI	CBI	CBI	CBI	1,000,000,000 ‚Äì <5,000,000,000	1,000,000,000 ‚Äì <5,000,000,000	1,000,000,000 ‚Äì <5,000,000,000	1,000,000,000 ‚Äì <5,000,000,000
1,2,3-Propanetriol	39.1662	-84.4357	703570	56-81-5	56815	CASRN	EMD Holding Corp	One Technology Place		Rockland	Plymouth	MA	2370	96-370-9014									EMD MILLIPORE CORP	2909 HIGHLAND AVENUE		NORWOOD	HAMILTON COUNTY	OH	45212-2411	01-696-8653	TSCA9298	110000000000	325180 Other Basic Inorganic Chemical Manufacturing	Both	325414 Biological Product (Except Diagnostic) Manufacturing	Both	325199 All Other Basic Organic Chemical Manufacturing	Both	Import	CBI	CBI	CBI	CBI	CBI	CBI	1,000,000,000 ‚Äì <5,000,000,000	1,000,000,000 ‚Äì <5,000,000,000	1,000,000,000 ‚Äì <5,000,000,000	1,000,000,000 ‚Äì <5,000,000,000
1,2,3-Propanetriol	39.1691	-91.8828	731938	56-81-5	56815	CASRN	ARCHER DANIELS MIDLAND COMPANY	4666 E FARIES PARKWAY		DECATUR	MACON	IL	62526	00-130-7586									MID AMERICA BIOFUELS LLC-MEXICO	410 S JEFFERSON ST		MEXICO	AUDRAIN COUNTY	MO	65265	78-875-2645	TSCA8905	110038000000	325199 All Other Basic Organic Chemical Manufacturing	Manufacture					Manufacture	13000000	0	13000000	12000000	14000000	19000000	1,000,000,000 ‚Äì <5,000,000,000	1,000,000,000 ‚Äì <5,000,000,000	1,000,000,000 ‚Äì <5,000,000,000	1,000,000,000 ‚Äì <5,000,000,000
1,2,3-Propanetriol	39.1748	-84.5032	736624	56-81-5	56815	CASRN	VVF INTERVEST, LLC	1705 KANSAS AVE.		KANSAS CITY	WYANDOTTE	KS	66105	79-142-5452									ST BERNARD SOAP CO	5177 SPRING GROVE AVE		CINCINNATI	HAMILTON	OH	45217	13-020-1267	TSCA8521	110016000000	325611 Soap And Other Detergent Manufacturing	Manufacture					Manufacture	23710881	0	23710881	14545351	15764383	19291525	1,000,000,000 ‚Äì <5,000,000,000	1,000,000,000 ‚Äì <5,000,000,000	1,000,000,000 ‚Äì <5,000,000,000	1,000,000,000 ‚Äì <5,000,000,000
1,2,3-Propanetriol	39.1752	-84.5078	703494	56-81-5	56815	CASRN	Marathon Petroleum Company LP	539 S. Main St.		Findlay	Hancock	OH	45840	96-299-3101									CINCINNATI RENEWABLE FUELS LLC	4700 ESTE AVENUE		CINCINNATI	HAMILTON COUNTY	OH	45232-1415	12-858-2967	TSCA7361	110042000000	325199 All Other Basic Organic Chemical Manufacturing	Manufacture					Manufacture	57123140	0	57123140	63424334	47387420	48426060	1,000,000,000 ‚Äì <5,000,000,000	1,000,000,000 ‚Äì <5,000,000,000	1,000,000,000 ‚Äì <5,000,000,000	1,000,000,000 ‚Äì <5,000,000,000
1,2,3-Propanetriol	39.1798	-84.5079	712060	56-81-5	56815	CASRN	EMERY OLEOCHEMICALS	4900 ESTE AVENUE		CINCINNATI,	Hamilton	OH	45232	61-401-0838	EMERY OLEOCHEMICALS (M) SDN BHD	Lot 4, Jalan Perak, Kawasan Perusahaan,		Telok Panglima Garang		42500	MY	65-202-4605	EMERY OLEOCHEMICALS	4900 ESTE AVENUE		CINCINNATI	HAMILTON	OH	45232	61-401-0838	TSCA4335	110067000000	325199 All Other Basic Organic Chemical Manufacturing	Both					Both	CBI	CBI	CBI	CBI	CBI	CBI	1,000,000,000 ‚Äì <5,000,000,000	1,000,000,000 ‚Äì <5,000,000,000	1,000,000,000 ‚Äì <5,000,000,000	1,000,000,000 ‚Äì <5,000,000,000
1,2,3-Propanetriol	39.1853	-84.501	709872	56-81-5	56815	CASRN	BASF Corp	100 Park Ave		Florham Park	Morris	NJ	7932	00-130-7032	BASF SE	Carl-Bosch-Str-38		Ludwigshafen		67056	GM	31-500-0554	BASF CORP	5000 ESTECREEK DR		CINCINNATI	HAMILTON COUNTY	OH	45232	11-457-1107	TSCA122966	110070000000	325199 All Other Basic Organic Chemical Manufacturing	Withheld					CBI	CBI	CBI	CBI	0	CBI	CBI	1,000,000,000 ‚Äì <5,000,000,000	1,000,000,000 ‚Äì <5,000,000,000	1,000,000,000 ‚Äì <5,000,000,000	1,000,000,000 ‚Äì <5,000,000,000
1,2,3-Propanetriol	39.4846	-81.0934	732264	56-81-5	56815	CASRN	MOMENTIVE PERFORMANCE MATERIALS	10851 Energy Highway	Bldg. 42	FRIENDLY	Tyler	WV	26146	00-208-0034									MPM SILICONES LLC	3500 SOUTH STATE ROUTE 2		FRIENDLY	TYLER COUNTY	WV	26146-9750	00-208-0034	100603245	110000000000	325199 All Other Basic Organic Chemical Manufacturing	Both					Both	36370	104306	140676	130558	138622	92818	1,000,000,000 ‚Äì <5,000,000,000	1,000,000,000 ‚Äì <5,000,000,000	1,000,000,000 ‚Äì <5,000,000,000	1,000,000,000 ‚Äì <5,000,000,000
1,2,3-Propanetriol	39.7271	-94.8728	700015	56-81-5	56815	CASRN	AG PROCESSING INC	12700 WEST DODGE ROAD	PO BOX 2047	OMAHA	DOUGLAS	NE	68154	00-527-5631									AG PROCESSING INC	900 SOUTHWEST LOWER LAKE ROAD		SAINT JOSEPH	BUCHANAN	MO	64504-9503	00-527-5631	TSCA7256	110015000000	311225 Fats And Oils Refining And Blending	Manufacture	325199 All Other Basic Organic Chemical Manufacturing	Manufacture			Manufacture	26341988	0	26341988	30790776	27046217	29419536	1,000,000,000 ‚Äì <5,000,000,000	1,000,000,000 ‚Äì <5,000,000,000	1,000,000,000 ‚Äì <5,000,000,000	1,000,000,000 ‚Äì <5,000,000,000
1,2,3-Propanetriol	39.8199	-75.2164	719707	56-81-5	56815	CASRN	COIM USA IN.	286 MANTUA GROVE ROAD BLD # 1		WEST DEPTFORD	Gloucester	NJ	08066-1738	10-247-2029									COIM USA INC	286 MANTUA GROVE ROAD		WEST DEPTFORD	GLOUCESTER	NJ	08066-1738	10-247-2029	TSCA8405	110000000000	325520 Adhesive Manufacturing	Manufacture					Import	0	2058708	2058708	1666159	1319156	818391	1,000,000,000 ‚Äì <5,000,000,000	1,000,000,000 ‚Äì <5,000,000,000	1,000,000,000 ‚Äì <5,000,000,000	1,000,000,000 ‚Äì <5,000,000,000
1,2,3-Propanetriol	39.8597	-88.9029	731953	56-81-5	56815	CASRN	ARCHER DANIELS MIDLAND COMPANY	4666 E FARIES PARKWAY		DECATUR	MACON	IL	62526	00-130-7586									ADM-DECATUR-VITAMIN E	3700 E DIVISION ST		DECATUR	MACON COUNTY	IL	62526	93-279-5610	TSCA10057307	110071000000	325411 Medicinal And Botanical Manufacturing	Manufacture					Manufacture	110000	0	110000	57000	16000	0	1,000,000,000 ‚Äì <5,000,000,000	1,000,000,000 ‚Äì <5,000,000,000	1,000,000,000 ‚Äì <5,000,000,000	1,000,000,000 ‚Äì <5,000,000,000
1,2,3-Propanetriol	39.8636	-88.8836	731589	56-81-5	56815	CASRN	Archer Daniels Midland Company	4666 E FARIES PARKWAY		Decatur	IL	IL	62526	00-130-7586									ADM-DECATUR-CORP OFFICES	4666 E FARIES PKWY		DECATUR	MACON COUNTY	IL	62526	00-130-7586	TSCA10057292	110071000000	551114 Corporate, Subsidiary, And Regional Managing Offices	Import					Import	0	15000000	15000000	11000000	19000000	18000000	1,000,000,000 ‚Äì <5,000,000,000	1,000,000,000 ‚Äì <5,000,000,000	1,000,000,000 ‚Äì <5,000,000,000	1,000,000,000 ‚Äì <5,000,000,000
1,2,3-Propanetriol	39.8657	-88.8928	731725	56-81-5	56815	CASRN	Archer Daniels Midland Company	4666 E FARIES PARKWAY		Decatur	MACON	IL	62526	00-130-7586									ADM-DECATUR-GLYCOLS	4666 E FARIES PKWY		DECATUR	MACON COUNTY	IL	62526	00-130-7586	TSCA123162	110050000000	325199 All Other Basic Organic Chemical Manufacturing	Manufacture					Manufacture	1700000	0	1700000	270000	1700000	1700000	1,000,000,000 ‚Äì <5,000,000,000	1,000,000,000 ‚Äì <5,000,000,000	1,000,000,000 ‚Äì <5,000,000,000	1,000,000,000 ‚Äì <5,000,000,000
1,2,3-Propanetriol	40.1288	-87.6179	722617	56-81-5	56815	CASRN	REG	416 S. BELL AVENUE		AMES	Vermillion	IA	50010	01-289-3898									REG DANVILLE LLC	300 N ANDERSON ST		DANVILLE	VERMILION	IL	61832-5902	82-956-8539	TSCA9049	110037000000	325199 All Other Basic Organic Chemical Manufacturing	Manufacture					Manufacture	40692448	0	40692448	41848415	42061347	39232562	1,000,000,000 ‚Äì <5,000,000,000	1,000,000,000 ‚Äì <5,000,000,000	1,000,000,000 ‚Äì <5,000,000,000	1,000,000,000 ‚Äì <5,000,000,000
1,2,3-Propanetriol	40.1315	-75.2737	718726	56-81-5	56815	CASRN	Acme-Hardesty CO A Division of Jacob Stern & Sons, Inc	450 Sentry Parkway	Suite 104	Blue Bell	Montgomery	PA	19422	78-319-5154									ACME-HARDESTY CO	450 SENTRY PKWY	SUITE 104	BLUE BELL	MONTGOMERY COUNTY	PA	19422	78-319-5154	TSCA10073359	110071000000	424690 Other Chemical And Allied Products Merchant Wholesalers	Import					Import	0	36294393	36294393	9588088	10943409	15762896	1,000,000,000 ‚Äì <5,000,000,000	1,000,000,000 ‚Äì <5,000,000,000	1,000,000,000 ‚Äì <5,000,000,000	1,000,000,000 ‚Äì <5,000,000,000
1,2,3-Propanetriol	40.2033	-75.0835	734129	56-81-5	56815	CASRN	Gehring-Montgomery, Inc.	710 Louis Drive		Warminster	Bucks	PA	18974	11-434-1357	TER HELL & CO GMBH	Borsenbrucke 2		Hamburg		20457	GM	11-434-1357	GEHRING MONTGOMERY	710 LOUIS DRIVE		WARMINSTER	BUCKS	PA	18974-2829	11-434-1357	100606008	110000000000	325998 All Other Miscellaneous Chemical Product And Preparation Manufacturing	Both					Manufacture	1074280	0	1074280	1246220	1060620	827720	1,000,000,000 ‚Äì <5,000,000,000	1,000,000,000 ‚Äì <5,000,000,000	1,000,000,000 ‚Äì <5,000,000,000	1,000,000,000 ‚Äì <5,000,000,000
1,2,3-Propanetriol	40.2872	-96.7639	735964	56-81-5	56815	CASRN	Flint Hills Resources, LP	4111 EAST 37TH STREET N.		WICHITA	SEDGWICK	KS	67220	05-657-6507									DUONIX BEATRICE LP	722 KINNEY DR		BEATRICE	GAGE	NE	68310	07-960-2435	TSCA10052952	110045000000	325199 All Other Basic Organic Chemical Manufacturing	Manufacture					Manufacture	9333615	0	9333615	22102600	15274553	1726358	1,000,000,000 ‚Äì <5,000,000,000	1,000,000,000 ‚Äì <5,000,000,000	1,000,000,000 ‚Äì <5,000,000,000	1,000,000,000 ‚Äì <5,000,000,000
1,2,3-Propanetriol	40.3143	-74.6523	740921	56-81-5	56815	CASRN	Solvay Holding Inc	504 Carnegie Center		Princeton	Mercer	NJ	8540	87-474-8937	SOLVAY S A	RUE DE RANSBEEK, 310	1120 Brussels	Brussels			BE	37-000-9086	SOLVAY USA INC	504 CARNEGIE CTR		PRINCETON	MERCER COUNTY	NJ	8540	00-295-9810	TSCA123682	110070000000	325199 All Other Basic Organic Chemical Manufacturing	Manufacture					Import	CBI	CBI	CBI	CBI	CBI	CBI	1,000,000,000 ‚Äì <5,000,000,000	1,000,000,000 ‚Äì <5,000,000,000	1,000,000,000 ‚Äì <5,000,000,000	1,000,000,000 ‚Äì <5,000,000,000
1,2,3-Propanetriol	40.4575	-80.1933	707112	56-81-5	56815	CASRN	LANXESS CORPORATION	111 RIDC PARK WEST DRIVE		PITTSBURGH	Allegheny	PA	15275	14-585-8770	LANXESS DEUTSCHLAND GMBH	Kennedyplatz 1		Koln		50569	GM	31-546-4482	LANXESS CORPORATION---PITTSBURGH	111 RIDC PARK WEST DR		PITTSBURGH	ALLEGHENY COUNTY	PA	15275-1112	14-585-8770	100606790	110024000000	325130 Synthetic Dye And Pigment Manufacturing	Import	325199 All Other Basic Organic Chemical Manufacturing	Import			Import	0	1723	1723	32430	1575	692	1,000,000,000 ‚Äì <5,000,000,000	1,000,000,000 ‚Äì <5,000,000,000	1,000,000,000 ‚Äì <5,000,000,000	1,000,000,000 ‚Äì <5,000,000,000
1,2,3-Propanetriol	40.5107	-74.3417	716086	56-81-5	56815	CASRN	Zebra Pen Corporation	242 Raritan Center Parkway		Edison	Middlesex	NJ	8837	10-169-0956									ZEBRA PEN CORP.	242 RARITAN CENTER PKWY		EDISON	MIDDLESEX COUNTY	NJ	8837	10-169-0956	TSCA10071499	110071000000	424120 Stationery And Office Supplies Merchant Wholesalers	Import					Import	0	28241	28241	0	0	0	1,000,000,000 ‚Äì <5,000,000,000	1,000,000,000 ‚Äì <5,000,000,000	1,000,000,000 ‚Äì <5,000,000,000	1,000,000,000 ‚Äì <5,000,000,000
1,2,3-Propanetriol	40.5825	-74.612	703065	56-81-5	56815	CASRN	BROTHER INTERNATIONAL CORPORATION	200 Crossing Blvd		BRIDGEWATER	Somerset	NJ	8807	06-499-2902									BROTHER INTERNATIONAL CORP	200 CROSSING BLVD		BRIDGEWATER	SOMERSET COUNTY	NJ	8807	06-499-2902	TSCA82681	110064000000	333318 Other Commercial And Service Industry Machinery Manufacturing	Import	423420 Office Equipment Merchant Wholesalers	Import			Import	0	87783	87783	84041	57060	57209	1,000,000,000 ‚Äì <5,000,000,000	1,000,000,000 ‚Äì <5,000,000,000	1,000,000,000 ‚Äì <5,000,000,000	1,000,000,000 ‚Äì <5,000,000,000
1,2,3-Propanetriol	40.7521	-75.2384	737717	56-81-5	56815	CASRN	HALLMARK CARDS	2501 McGee Trafficway		KANSAS CITY	JACKSON	MO	64108	00-713-1113									CRAYOLA LLC CHURCH LN PLT	1100 CHURCH LANE		EASTON	NORTHAMPTON COUNTY	PA	18040-6638	00-137-4909	TSCA8606	110000000000	339942 Lead Pencil And Art Good Manufacturing	Both					Import	0	197018	197018	372601	255827	597224	1,000,000,000 ‚Äì <5,000,000,000	1,000,000,000 ‚Äì <5,000,000,000	1,000,000,000 ‚Äì <5,000,000,000	1,000,000,000 ‚Äì <5,000,000,000
1,2,3-Propanetriol	40.7734	-74.4261	726857	56-81-5	56815	CASRN	BASF Corporation	100 Park Avenue		Florham Park	NJ	MI	7932	00-130-7032	BASF SE	Carl-Bosch Strasse 38		Ludwigshafen		60756	GM	31-500-0554	BASF IMPORTS PART 1	100 PARK AVE		FLORHAM PARK	MORRIS COUNTY	NJ	7932	00-130-7032	TSCA130148	110070000000	325199 All Other Basic Organic Chemical Manufacturing	Import					Import	CBI	CBI	CBI	CBI	CBI	CBI	1,000,000,000 ‚Äì <5,000,000,000	1,000,000,000 ‚Äì <5,000,000,000	1,000,000,000 ‚Äì <5,000,000,000	1,000,000,000 ‚Äì <5,000,000,000
1,2,3-Propanetriol	40.7777	-73.4251	741208	56-81-5	56815	CASRN	Canon U.S.A., Inc.	One Canon Park		Melville	Suffolk	NY	11747	04-153-0692									CANON USA INC	1 CANON PARK		MELVILLE	SUFFOLK	NY	11747	04-153-0692	TSCA120782	110055000000	423420 Office Equipment Merchant Wholesalers	Import	423690 Other Electronic Parts And Equipment Merchant Wholesalers	Import			Import	CBI	CBI	CBI	CBI	CBI	CBI	1,000,000,000 ‚Äì <5,000,000,000	1,000,000,000 ‚Äì <5,000,000,000	1,000,000,000 ‚Äì <5,000,000,000	1,000,000,000 ‚Äì <5,000,000,000
1,2,3-Propanetriol	40.8485	-74.4668	738574	56-81-5	56815	CASRN	Ricoh USA, Inc.	2 Gatehall Drive		Parsippany	Morris	NJ	7054	04-396-4519	RICOH CO LTD	3-6, Nakamagome 1-chome		Ohta-ku		143-8555	JA	04-396-4519	RICOH USA, INC.	2 GATEHALL DR		PARSIPPANY	MORRIS COUNTY	NJ	7054	04-396-4519	TSCA10055761	110071000000	423430 Computer And Computer Peripheral Equipment And Software Merchant Wholesalers	Import					Import	0	55323	55323	37744	35607	73918	1,000,000,000 ‚Äì <5,000,000,000	1,000,000,000 ‚Äì <5,000,000,000	1,000,000,000 ‚Äì <5,000,000,000	1,000,000,000 ‚Äì <5,000,000,000
1,2,3-Propanetriol	40.8705	-74.4506	710134	56-81-5	56815	CASRN	RECKITT BENCKISER	399 INTERPACE PARKWAY		PARSIPPANY	Morris	NJ	7054	09-440-5024	RECKITT BENCKISER GROUP PLC	Turner House		Slough		SL1 3UH	UK	21-557-6498	RECKITT BENCKISER	399 INTERPACE PKWY		PARSIPPANY		NJ	7054	09-440-5024	TSCA10066040	110067000000	325611 Soap And Other Detergent Manufacturing	Both					Import	0	268191	268191	178340	188172	197650	1,000,000,000 ‚Äì <5,000,000,000	1,000,000,000 ‚Äì <5,000,000,000	1,000,000,000 ‚Äì <5,000,000,000	1,000,000,000 ‚Äì <5,000,000,000
1,2,3-Propanetriol	40.8835	-74.2936	707664	56-81-5	56815	CASRN	Delta Carbona, L.P.	376 Hollywood Ave	Suite 208	Fairfield	Essex	NJ	7004	13-377-7208									DELTA CARBONA, L.P.	376 HOLLYWOOD AVE	SUITE 208	FAIRFIELD	ESSEX COUNTY	NJ	7004	13-377-7208	TSCA10060819	110071000000	325611 Soap And Other Detergent Manufacturing	Import					Import	0	205832	205832	170810	33632	12086	1,000,000,000 ‚Äì <5,000,000,000	1,000,000,000 ‚Äì <5,000,000,000	1,000,000,000 ‚Äì <5,000,000,000	1,000,000,000 ‚Äì <5,000,000,000
1,2,3-Propanetriol	40.8913	-85.4904	714218	56-81-5	56815	CASRN	Ecolab Inc	1 Ecolab Place		St. Paul	Ramsey	MN	55102	00-615-4611									ECOLAB	970 E. TIPTON ST.		HUNTINGTON	HUNTINGTON COUNTY	IN	467501611	94-387-9395	100605676	110000000000	325611 Soap And Other Detergent Manufacturing	Both					Both	3229	14	3243	43305	88252	39763	1,000,000,000 ‚Äì <5,000,000,000	1,000,000,000 ‚Äì <5,000,000,000	1,000,000,000 ‚Äì <5,000,000,000	1,000,000,000 ‚Äì <5,000,000,000
1,2,3-Propanetriol	40.913	-74.081	731344	56-81-5	56815	CASRN	ACIDCHEM (USA) INC.	201 W. PASSAIC STREET SUITE 100		Rochelle Park	Bergen	NJ	07662-3128	83-600-2808	IOI ACIDCHEM SDN BHD	2411 Lorong Perusahaan Satu	Prai Industrial Complex	Prai	Penang	13600	MY	65-224-5531	ACIDCHEM USA INC	201 W. PASSAIC STREET		ROCHELLE PARK	BERGEN COUNTY	NJ	07662-3100	83-600-2808	TSCA7727	110017000000	325180 Other Basic Inorganic Chemical Manufacturing	Import					Import	CBI	CBI	CBI	CBI	CBI	CBI	1,000,000,000 ‚Äì <5,000,000,000	1,000,000,000 ‚Äì <5,000,000,000	1,000,000,000 ‚Äì <5,000,000,000	1,000,000,000 ‚Äì <5,000,000,000
1,2,3-Propanetriol	41.0298	-73.774	706597	56-81-5	56815	CASRN	Marubeni America Corporation	375 Lexington Ave.		New York	New York	NY	10017	00-167-0876									MARUBENI SPECIALTY CHEMICALS INC.	10 BANK ST	SUITE 740	WHITE PLAINS	WESTCHESTER COUNTY	NY	10606	78-727-6633	TSCA4463	110005000000	424690 Other Chemical And Allied Products Merchant Wholesalers	Import					Import	0	44092	44092	132276	0	0	1,000,000,000 ‚Äì <5,000,000,000	1,000,000,000 ‚Äì <5,000,000,000	1,000,000,000 ‚Äì <5,000,000,000	1,000,000,000 ‚Äì <5,000,000,000
1,2,3-Propanetriol	41.0523	-73.5307	716656	56-81-5	56815	CASRN	Henkel US Operations Corporation	200 Elm St		Stamford	Franklin	CT	6902	08-126-4055									HENKEL US OPERATIONS CORPORATION	200 ELM ST		STAMFORD	FAIRFIELD COUNTY	CT	6902	08-126-4055	TSCA10072247	110071000000	325611 Soap And Other Detergent Manufacturing	Import					Import	0	41558	41558	0	0	0	1,000,000,000 ‚Äì <5,000,000,000	1,000,000,000 ‚Äì <5,000,000,000	1,000,000,000 ‚Äì <5,000,000,000	1,000,000,000 ‚Äì <5,000,000,000
1,2,3-Propanetriol	41.0855	-87.8805	734781	56-81-5	56815	CASRN	BASF CORPORATION	100 Park Ave		Florham Park	Morris	NJ	7932	00-130-7032	BASF SE	Carl-Bosch-Str-38		Ludwigshafen		67056	GM	31-500-0558	BASF CHEMICALS	2525 SOUTH KENSINGTON ROAD		KANKAKEE	KANKAKEE	IL	60901	00-521-5769	TSCA4569	110044000000	325199 All Other Basic Organic Chemical Manufacturing	Withheld					CBI	CBI	CBI	CBI	CBI	0	0	1,000,000,000 ‚Äì <5,000,000,000	1,000,000,000 ‚Äì <5,000,000,000	1,000,000,000 ‚Äì <5,000,000,000	1,000,000,000 ‚Äì <5,000,000,000
1,2,3-Propanetriol	41.1253	-85.8932	706001	56-81-5	56815	CASRN	LOUIS DREYFUS COMPANYAGRICULTURAL INDUSTRIES LL, IN	7344 STATE ROAD 15 SOUTH		CLAYPOOL	Kosciusko	IN	45610-9746	96-543-4793									LOUIS DREYFUS AGRICULTURAL INDUSTRIES LL	7344 STATE ROAD 15 SOUTH		CLAYPOOL	KOSCIUSKO	IN	46510-9289	82-127-5180	TSCA7751	110033000000	311222 Soybean Processing	Manufacture					Manufacture	67606626	0	67606626	65636280	63573898	41378248	1,000,000,000 ‚Äì <5,000,000,000	1,000,000,000 ‚Äì <5,000,000,000	1,000,000,000 ‚Äì <5,000,000,000	1,000,000,000 ‚Äì <5,000,000,000
1,2,3-Propanetriol	41.1369	-92.6452	716068	56-81-5	56815	CASRN	Cargill, Incorporated	15407 McGinty Road West		Wayzata	Hennepin	MN	55391	00-624-9189									CARGILL INC - EDDYVILLE IA	1 CARGILL DR		EDDYVILLE	MONROE COUNTY	IA	52553-5000	07-533-2598	TSCA10058339	110069000000	311221 Wet Corn Milling	Manufacture	325193 Ethyl Alcohol Manufacturing	Manufacture			Manufacture	CBI	0	CBI	CBI	CBI	CBI	1,000,000,000 ‚Äì <5,000,000,000	1,000,000,000 ‚Äì <5,000,000,000	1,000,000,000 ‚Äì <5,000,000,000	1,000,000,000 ‚Äì <5,000,000,000
1,2,3-Propanetriol	41.2901	-72.9029	704681	56-81-5	56815	CASRN	American Greenfuels LLC	30 WATERFRONT ST		East Haven	New Haven	CT	6512	08-006-9567									AMERICAN GREENFUELS LLC	30 WATERFRONT STREET		NEW HAVEN	NEW HAVEN COUNTY	CT	6512	08-006-9567	TSCA10058439	110070000000	325199 All Other Basic Organic Chemical Manufacturing	Manufacture					Manufacture	CBI	0	CBI	CBI	CBI	CBI	1,000,000,000 ‚Äì <5,000,000,000	1,000,000,000 ‚Äì <5,000,000,000	1,000,000,000 ‚Äì <5,000,000,000	1,000,000,000 ‚Äì <5,000,000,000
1,2,3-Propanetriol	41.3058	-88.5911	725585	56-81-5	56815	CASRN	REG	416 S. BELL AVENUE		AMES	Story	IA	50010	01-289-3898									REG SENECA LLC	614 SHIPYARD RD		SENECA	LASALLE	IL	61360	96-500-1865	TSCA9048	110025000000	325199 All Other Basic Organic Chemical Manufacturing	Manufacture					Manufacture	76866611	0	76866611	76395462	77500529	80781059	1,000,000,000 ‚Äì <5,000,000,000	1,000,000,000 ‚Äì <5,000,000,000	1,000,000,000 ‚Äì <5,000,000,000	1,000,000,000 ‚Äì <5,000,000,000
1,2,3-Propanetriol	41.3067	-91.6689	707788	56-81-5	56815	CASRN	IOWA RENEWABLE ENERGY, LLC	1701 E. 7TH ST		WASHINGTON	Washington	IA	52353	62-667-3227									IOWA RENEWABLE ENERGY LLC	1701 E 7TH ST		WASHINGTON	WASHINGTON	IA	52353	62-667-3227	100606564	110037000000	325199 All Other Basic Organic Chemical Manufacturing	Manufacture					Manufacture	9962487	0	9962487	23949069	19736271	24997295	1,000,000,000 ‚Äì <5,000,000,000	1,000,000,000 ‚Äì <5,000,000,000	1,000,000,000 ‚Äì <5,000,000,000	1,000,000,000 ‚Äì <5,000,000,000
1,2,3-Propanetriol	41.3662	-73.4155	710841	56-81-5	56815	CASRN	VANDERBILT CHEMICALS, LLC	30 WINFIELD STREET	P.O. BOX 5150	NORWALK	Fairfield	CT	06856-5150	07-870-9973									VANDERBILT CHEMICALS, LLC	31 TAYLOR AVE		BETHEL	FAIRFIELD COUNTY	CT	6801	00-118-1205	200004348	110000000000	325998 All Other Miscellaneous Chemical Product And Preparation Manufacturing	Manufacture						0	0	0	CBI	CBI	CBI	1,000,000,000 ‚Äì <5,000,000,000	1,000,000,000 ‚Äì <5,000,000,000	1,000,000,000 ‚Äì <5,000,000,000	1,000,000,000 ‚Äì <5,000,000,000
1,2,3-Propanetriol	41.3944	-74.341	739863	56-81-5	56815	CASRN	BLASER SWISSLUBE INC.	31 HATFIELD LANE		GOSHEN	Orange	NY	10924	80-170-1368									BLASER SWISSLUBE	31 HATFIELD LANE, WESTGATE INDUSTRIAL PARK		GOSHEN	ORANGE COUNTY	NY	10924	80-170-1368	200000636	110013000000	324191 Petroleum Lubricating Oil And Grease Manufacturing	Manufacture					Import	CBI	CBI	CBI	CBI	CBI	CBI	1,000,000,000 ‚Äì <5,000,000,000	1,000,000,000 ‚Äì <5,000,000,000	1,000,000,000 ‚Äì <5,000,000,000	1,000,000,000 ‚Äì <5,000,000,000
1,2,3-Propanetriol	41.4085	-88.3285	700284	56-81-5	56815	CASRN	NOURYON SURFACE CHEMISTRY LLC	131 S. DEARBORN ST	SUITE 1000	CHICAGO	Cook	IL	60603	83-304-4659									NOURYON SURFACE CHEMISTRY LLC	8005 NORTH TABLER RD.		MORRIS	GRUNDY COUNTY	IL	60450-9184	06-299-9347	100604507	110001000000	325199 All Other Basic Organic Chemical Manufacturing	Manufacture					Manufacture	CBI	CBI	CBI	CBI	CBI	CBI	1,000,000,000 ‚Äì <5,000,000,000	1,000,000,000 ‚Äì <5,000,000,000	1,000,000,000 ‚Äì <5,000,000,000	1,000,000,000 ‚Äì <5,000,000,000
1,2,3-Propanetriol	41.4605	-87.7231	728149	56-81-5	56815	CASRN	Solvay Holding Inc	504 Carnegie Center		Princeton	Mercer	NJ	8540	87-474-8937	SOLVAY SA	RUE DE RANSBEEK, 310	1120 Brussels	Brussels			BE	37-000-9086	RHODIA INC	24601 GOVERNORS HIGHWAY		UNIVERSITY PARK	WILL	IL	60466-4107	07-442-1462	TSCA4241	110000000000	325199 All Other Basic Organic Chemical Manufacturing	Manufacture					Manufacture	CBI	0	CBI	CBI	CBI	CBI	1,000,000,000 ‚Äì <5,000,000,000	1,000,000,000 ‚Äì <5,000,000,000	1,000,000,000 ‚Äì <5,000,000,000	1,000,000,000 ‚Äì <5,000,000,000
1,2,3-Propanetriol	41.4915	-87.8478	720517	56-81-5	56815	CASRN	Blachford Enterprises	1400 Nuclear Drive		West Chicago	DuPage	IL	60185	61-495-1275									BLACHFORD CORP	401 CENTER RD.		FRANKFORT	WILL COUNTY	IL	60423	04-530-5083	TSCA4595	110000000000	325998 All Other Miscellaneous Chemical Product And Preparation Manufacturing	Both					Manufacture	158900	0	158900	190300	106200	148200	1,000,000,000 ‚Äì <5,000,000,000	1,000,000,000 ‚Äì <5,000,000,000	1,000,000,000 ‚Äì <5,000,000,000	1,000,000,000 ‚Äì <5,000,000,000
1,2,3-Propanetriol	41.6382	-87.6713	719773	56-81-5	56815	CASRN	SOLVAY HOLDING INC	504 Carnegie Center		Princeton	Mercer	NJ	8540	87-474-8937	SOLVAY SA	RUE DE RANSBEEK, 310	1120 Brussels	Brussels			BE	37-000-9086	RHODIA INC	14000 SOUTH SEELEY AVENUE		BLUE ISLAND	COOK	IL	60406-3261	02-257-9150	TSCA4227	110000000000	325199 All Other Basic Organic Chemical Manufacturing	Manufacture					Manufacture	CBI	0	CBI	CBI	CBI	CBI	1,000,000,000 ‚Äì <5,000,000,000	1,000,000,000 ‚Äì <5,000,000,000	1,000,000,000 ‚Äì <5,000,000,000	1,000,000,000 ‚Äì <5,000,000,000
1,2,3-Propanetriol	41.7292	-74.0609	739400	56-81-5	56815	CASRN	KIC CHEMICALS INC	87 SOUTH OHIOVILLE RD		NEW PALTZ	ULSTER	NY	12561	13-180-8123									KIC Chemicals Inc	87 South Ohioville Rd		New Paltz		NY	12561	13-180-8123	TSCA9414	110057000000	424690 Other Chemical And Allied Products Merchant Wholesalers	Import					Both	2030800	120000	2150800	2536100	4264220	2749620	1,000,000,000 ‚Äì <5,000,000,000	1,000,000,000 ‚Äì <5,000,000,000	1,000,000,000 ‚Äì <5,000,000,000	1,000,000,000 ‚Äì <5,000,000,000
1,2,3-Propanetriol	41.732	-88.3662	703834	56-81-5	56815	CASRN	VVF KANSAS SERVICES	1705 KANSAS AVE.		KANSAS CITY	Wyandotte	KS	66105	79-142-5452									VVF ILLINOIS SERVICES LLC	2000 AUCUTT ROAD		MONTGOMERY	KANE COUNTY	IL	60538-1192	02-417-7178	100602164	110002000000	325611 Soap And Other Detergent Manufacturing	Manufacture						0	0	0	8192910	11787590	15053995	1,000,000,000 ‚Äì <5,000,000,000	1,000,000,000 ‚Äì <5,000,000,000	1,000,000,000 ‚Äì <5,000,000,000	1,000,000,000 ‚Äì <5,000,000,000
1,2,3-Propanetriol	41.7329	-93.0194	725528	56-81-5	56815	CASRN	REG	416 S. BELL AVENUE		AMES	Story	IA	50010	01-289-3898									REG NEWTON	3426 E 28TH ST N		NEWTON	JASPER	IA	50208	79-646-7756	TSCA8994	110025000000	325199 All Other Basic Organic Chemical Manufacturing						Manufacture	30119271	0	30119271	30672976	29559026	26872054	1,000,000,000 ‚Äì <5,000,000,000	1,000,000,000 ‚Äì <5,000,000,000	1,000,000,000 ‚Äì <5,000,000,000	1,000,000,000 ‚Äì <5,000,000,000
1,2,3-Propanetriol	41.8017	-90.3235	724162	56-81-5	56815	CASRN	LAKE ERIE BIOFUELS, LLC dba Hero BX	1540 EAST LAKE ROAD		ERIE	Erie	PA	16511	80-285-2546									HERO BX - CLINTON, IOWA	5640 44TH AVE S		CLINTON	CLINTON COUNTY	IA	52732	80-285-2546	TSCA10056217	110071000000	325199 All Other Basic Organic Chemical Manufacturing						Manufacture	CBI	0	CBI	0	0	0	1,000,000,000 ‚Äì <5,000,000,000	1,000,000,000 ‚Äì <5,000,000,000	1,000,000,000 ‚Äì <5,000,000,000	1,000,000,000 ‚Äì <5,000,000,000
1,2,3-Propanetriol	41.81	-87.6564	729537	56-81-5	56815	CASRN	Vantage Specialty Chemicals Inc.	4650 S. RACINE AVE.		CHICAGO	Cook	IL	60609	07-987-7907									VANTAGE OLEOCHEMICALS	4650 S. RACINE AVE.		CHICAGO	COOK COUNTY	IL	606093321	82-715-9406	100602275	110000000000	325199 All Other Basic Organic Chemical Manufacturing	Withheld					CBI	CBI	CBI	CBI	CBI	CBI	CBI	1,000,000,000 ‚Äì <5,000,000,000	1,000,000,000 ‚Äì <5,000,000,000	1,000,000,000 ‚Äì <5,000,000,000	1,000,000,000 ‚Äì <5,000,000,000
1,2,3-Propanetriol	41.9365	-71.1293	703447	56-81-5	56815	CASRN	EMD Holding Corp	One Technology Place		Rockland	Plymounth	MA	2370	96-370-9014									EMD MILLIPORE CORP	530 JOHN HANCOCK RD	SUITE 100	TAUNTON	BRISTOL	MA	2780	07-878-4283	TSCA10058214	110045000000	325180 Other Basic Inorganic Chemical Manufacturing	Import	325414 Biological Product (Except Diagnostic) Manufacturing	Import	325199 All Other Basic Organic Chemical Manufacturing	Import	Import	CBI	CBI	CBI	CBI	CBI	CBI	1,000,000,000 ‚Äì <5,000,000,000	1,000,000,000 ‚Äì <5,000,000,000	1,000,000,000 ‚Äì <5,000,000,000	1,000,000,000 ‚Äì <5,000,000,000
1,2,3-Propanetriol	42.041	-94.6359	725582	56-81-5	56815	CASRN	REG	416 S. BELL AVENUE		AMES	Story	IA	50010	01-289-3898									REG RALSTON LLC	406 1ST STREET		RALSTON	CARROLL	IA	51459-7714	96-350-9695	TSCA9050	110016000000	325199 All Other Basic Organic Chemical Manufacturing	Manufacture					Manufacture	33093060	0	33093060	20890762	12019396	15558729	1,000,000,000 ‚Äì <5,000,000,000	1,000,000,000 ‚Äì <5,000,000,000	1,000,000,000 ‚Äì <5,000,000,000	1,000,000,000 ‚Äì <5,000,000,000
1,2,3-Propanetriol	42.1467	-80.0521	728563	56-81-5	56815	CASRN	LAKE ERIE BIOFUELS, LLC dba Hero BX	1540 EAST LAKE ROAD		ERIE	ERIE	PA	16511	80-285-2546									LAKE ERIE BIOFUELS D/B/A HERO BX	1670 E LAKE RD		ERIE	ERIE COUNTY	PA	16511	80-285-2546	TSCA7814	110027000000	325199 All Other Basic Organic Chemical Manufacturing	Manufacture					Manufacture	CBI	0	CBI	CBI	CBI	CBI	1,000,000,000 ‚Äì <5,000,000,000	1,000,000,000 ‚Äì <5,000,000,000	1,000,000,000 ‚Äì <5,000,000,000	1,000,000,000 ‚Äì <5,000,000,000
1,2,3-Propanetriol	42.2555	-95.0911	739601	56-81-5	56815	CASRN	WESTERN IOWA ENERGY	1220 SOUTH CENTER STREET	PO BOX 399	WALL LAKE	SAC	IA	51466	15-287-0338									WESTERN IOWA ENERGY LLC	1220 S CENTER ST		WALL LAKE	SAC	IA	51466	15-287-0338	TSCA8894	110031000000	325199 All Other Basic Organic Chemical Manufacturing	Manufacture					Manufacture	CBI	0	CBI	CBI	CBI	CBI	1,000,000,000 ‚Äì <5,000,000,000	1,000,000,000 ‚Äì <5,000,000,000	1,000,000,000 ‚Äì <5,000,000,000	1,000,000,000 ‚Äì <5,000,000,000
1,2,3-Propanetriol	42.2868	-87.9548	736482	56-81-5	56815	CASRN	RIERDEN CHEMICAL & TRADING COMPANY	P.O. BOX 7072	115 West Church Street	LIBERTYVILLE	Lake	IL	60048	79-026-1671									RIERDEN CHEMICAL	115 W CHURCH ST		LIBERTYVILLE	LAKE COUNTY	IL	60048	79-026-1671	TSCA10057692	110071000000	424690 Other Chemical And Allied Products Merchant Wholesalers	Import					Import	0	12658262	12658262	10118673	11343659	11437465	1,000,000,000 ‚Äì <5,000,000,000	1,000,000,000 ‚Äì <5,000,000,000	1,000,000,000 ‚Äì <5,000,000,000	1,000,000,000 ‚Äì <5,000,000,000
1,2,3-Propanetriol	42.3052	-96.3623	700010	56-81-5	56815	CASRN	AG PROCESSING INC	12700 West Dodge Road	PO BOX 2047	OMAHA	Douglas	NE	68103-2047	00-527-5631									AG PROCESSING INC	2753 PORT NEAL CIR.		SERGEANT BLUFF	WOODBURY	IA	51054-8537	00-527-5631	TSCA7772	110000000000	311225 Fats And Oils Refining And Blending	Manufacture	325199 All Other Basic Organic Chemical Manufacturing	Manufacture			Manufacture	38904332	0	38904332	49899944	31754665	25647462	1,000,000,000 ‚Äì <5,000,000,000	1,000,000,000 ‚Äì <5,000,000,000	1,000,000,000 ‚Äì <5,000,000,000	1,000,000,000 ‚Äì <5,000,000,000
1,2,3-Propanetriol	42.3586	-89.8034	702618	56-81-5	56815	CASRN	ADKINS ENERGY LLC	PO BOX 227	4350 W. Galena Road	LENA	Stephenson	IL	61048	06-703-9185									ADKINS ENERGY LLC	4350 WEST GALENA ROAD		LENA	STEPHENSON COUNTY	IL	61048-8504	06-703-9185	100602543	110009000000	325193 Ethyl Alcohol Manufacturing	Manufacture					Manufacture	2146335	0	2146335	2404328	2198545	2096049	1,000,000,000 ‚Äì <5,000,000,000	1,000,000,000 ‚Äì <5,000,000,000	1,000,000,000 ‚Äì <5,000,000,000	1,000,000,000 ‚Äì <5,000,000,000
1,2,3-Propanetriol	42.4981	-71.1406	727787	56-81-5	56815	CASRN	RISO	10 State Street	Suite 201	Woburn	Middlesex	MA	1801	15-725-7486	RISO KAGAKU CORP	34-7 SHIBA 5-CHOME	TAMACHI CENTER	MINATO-KU		1088385	JA	00-000-0000	RISO, INC	10 STATE ST		WOBURN	MIDDLESEX COUNTY	MA	1801	15-725-7486	TSCA10056913	110071000000	423420 Office Equipment Merchant Wholesalers	Manufacture					Import	CBI	CBI	CBI	CBI	CBI	CBI	1,000,000,000 ‚Äì <5,000,000,000	1,000,000,000 ‚Äì <5,000,000,000	1,000,000,000 ‚Äì <5,000,000,000	1,000,000,000 ‚Äì <5,000,000,000
1,2,3-Propanetriol	42.5119	-93.2657	737234	56-81-5	56815	CASRN	CARGILL, INC	15407 MCGINTY ROAD WEST	MS 62	WAYZATA	Hennepin	MN	55391	00-624-9189									CARGILL IOWA FALLS	602 INDUSTRIAL RD		IOWA FALLS	HARDIN COUNTY	IA	50126	17-689-8385	TSCA10057486	110071000000	311224 Soybean And Other Oilseed Processing	Manufacture					Manufacture	CBI	0	CBI	CBI	CBI	CBI	1,000,000,000 ‚Äì <5,000,000,000	1,000,000,000 ‚Äì <5,000,000,000	1,000,000,000 ‚Äì <5,000,000,000	1,000,000,000 ‚Äì <5,000,000,000
1,2,3-Propanetriol	42.8415	-73.8918	707765	56-81-5	56815	CASRN	SI GROUP, INC.	2750 BALLTOWN RD.		SCHENECTADY	NISKAYUNA	NY	12309	00-207-0100									NISKAYUNA	2750 BALLTOWN ROAD		NISKAYUNA	SCHENECTADY COUNTY	NY	12309-1006	00-207-0100	100607246	110057000000	325199 All Other Basic Organic Chemical Manufacturing	Import					Import	CBI	CBI	CBI	CBI	CBI	CBI	1,000,000,000 ‚Äì <5,000,000,000	1,000,000,000 ‚Äì <5,000,000,000	1,000,000,000 ‚Äì <5,000,000,000	1,000,000,000 ‚Äì <5,000,000,000
1,2,3-Propanetriol	43.0347	-88.134	720618	56-81-5	56815	CASRN	HYDRITE CHEMICAL CO.	300 N. PATRICK BLVD.		BROOKFIELD	Waukesha	WI	53045	00-643-5887									HYDRITE CHEMICAL CO.	300 N PATRICK BLVD		BROOKFIELD	WAUKESHA COUNTY	WI	53045-5816	00-643-5887	TSCA5168	110012000000	325180 Other Basic Inorganic Chemical Manufacturing	Import	325199 All Other Basic Organic Chemical Manufacturing	Import							43402	0	0	1,000,000,000 ‚Äì <5,000,000,000	1,000,000,000 ‚Äì <5,000,000,000	1,000,000,000 ‚Äì <5,000,000,000	1,000,000,000 ‚Äì <5,000,000,000
1,2,3-Propanetriol	43.0776	-94.1875	700035	56-81-5	56815	CASRN	AG PROCESSING INC	12700 WEST DODGE ROAD	PO BOX 2047	OMAHA	DOUGLAS	NE	68154	00-527-5631									AG PROCESSING INC - ALGONA	2108 140TH AVE		ALGONA	KOSSUTH	IA	50511	00-527-5631	TSCA7251	110057000000	325199 All Other Basic Organic Chemical Manufacturing	Manufacture					Manufacture	46628705	0	46628705	52450977	46019300	46692584	1,000,000,000 ‚Äì <5,000,000,000	1,000,000,000 ‚Äì <5,000,000,000	1,000,000,000 ‚Äì <5,000,000,000	1,000,000,000 ‚Äì <5,000,000,000
1,2,3-Propanetriol	43.0975	-88.0606	722082	56-81-5	56815	CASRN	BRENNTAG GREAT LAKES, LLC	P.O. BOX 444		BUTLER	Milwaukee	WI	53007	04-245-4228	BRENNTAG AG	Messeallee 11		Essen		45131	GM	50-709-1739	BRENNTAG GREAT LAKES, LLC - WAUWATOSA WAREHOUSE	4420 N HARLEY DAVIDSON AVE		WAUWATOSA	MILWAUKEE COUNTY	WI	53226	04-245-4228	100601681	110019000000	424690 Other Chemical And Allied Products Merchant Wholesalers	Import					Import	0	334810	334810	90138	436275	119049	1,000,000,000 ‚Äì <5,000,000,000	1,000,000,000 ‚Äì <5,000,000,000	1,000,000,000 ‚Äì <5,000,000,000	1,000,000,000 ‚Äì <5,000,000,000
1,2,3-Propanetriol	43.1354	-93.2647	725575	56-81-5	56815	CASRN	REG	416 S. BELL AVENUE		AMES	Story	IA	50010	01-289-3898									REG MASON CITY, LLC	4172 19TH ST SW		MASON CITY	CERRO GORDO COUNTY	IA	50401	06-875-5168	TSCA120081	110031000000	325199 All Other Basic Organic Chemical Manufacturing	Manufacture					Manufacture	24595593	0	24595593	27265496	22814403	11720693	1,000,000,000 ‚Äì <5,000,000,000	1,000,000,000 ‚Äì <5,000,000,000	1,000,000,000 ‚Äì <5,000,000,000	1,000,000,000 ‚Äì <5,000,000,000
1,2,3-Propanetriol	43.256	-89.3362	725571	56-81-5	56815	CASRN	REG	416 S. BELL AVENUE		AMES	Story	IA	50010	01-289-3898									REG MADISON, LLC	533 N STEVENSON ST		DE FOREST	DANE COUNTY	WI	53532	00-612-5520	100607852	110027000000	325199 All Other Basic Organic Chemical Manufacturing	Manufacture					Manufacture	3858245	0	3858245	2270450	0	189374	1,000,000,000 ‚Äì <5,000,000,000	1,000,000,000 ‚Äì <5,000,000,000	1,000,000,000 ‚Äì <5,000,000,000	1,000,000,000 ‚Äì <5,000,000,000
1,2,3-Propanetriol	43.5741	-93.3003	722581	56-81-5	56815	CASRN	REG	416 S. BELL AVENUE		AMES	Story	IA	50010	01-289-3898									REG ALBERT LEA	15200 780TH AVE		ALBERT LEA	FREEBORN	MN	56007	96-922-3283	TSCA9047	110025000000	325199 All Other Basic Organic Chemical Manufacturing	Manufacture					Manufacture	36584874	0	36584874	38616882	36922776	38226012	1,000,000,000 ‚Äì <5,000,000,000	1,000,000,000 ‚Äì <5,000,000,000	1,000,000,000 ‚Äì <5,000,000,000	1,000,000,000 ‚Äì <5,000,000,000
1,2,3-Propanetriol	43.615	-84.1987	738043	56-81-5	56815	CASRN	The Dow Chemical Co	2211 H.H. Dow Way		Midland	Midland	MI	48674	08-036-1339									THE DOW CHEMICAL CO	2211 H.H. DOW WAY		MIDLAND	MIDLAND COUNTY	MI	48674	08-036-1339	TSCA10057799	110071000000	325199 All Other Basic Organic Chemical Manufacturing	Import	325211 Plastics Material And Resin Manufacturing	Import			Import	CBI	CBI	CBI	CBI	CBI	CBI	1,000,000,000 ‚Äì <5,000,000,000	1,000,000,000 ‚Äì <5,000,000,000	1,000,000,000 ‚Äì <5,000,000,000	1,000,000,000 ‚Äì <5,000,000,000
1,2,3-Propanetriol	43.7088	-95.4526	739130	56-81-5	56815	CASRN	MINNESOTA SOYBEAN PROCESSORS	P.O. BOX 100	121 Zeh Ave	BREWSTER	Nobles	MN	56119	08-491-6654									MINNESOTA SOYBEAN PROCESSORS	121 ZEH AVE PO BOX 100		BREWSTER	NOBLES	MN	56119	08-491-6654	TSCA121488	110069000000	311224 Soybean And Other Oilseed Processing	Manufacture					Manufacture	32201334	0	32201334	32005896	34143330	36322053	1,000,000,000 ‚Äì <5,000,000,000	1,000,000,000 ‚Äì <5,000,000,000	1,000,000,000 ‚Äì <5,000,000,000	1,000,000,000 ‚Äì <5,000,000,000
1,2,3-Propanetriol	44.865	-93.4646	725374	56-81-5	56815	CASRN	Stratasys Inc.	7665 Commerce Way		Eden Prairie	Hennepin	MN	55344	07-865-5905	STRATASYS LTD	1 Holtzman Street, Science Park	PO Box 2496	Rehovot		76124	IS	53-209-1048	STRATASYS INC	7665 COMMERCE WAY		EDEN PRAIRIE	HENNEPIN COUNTY	MN	55344	61-346-5806	TSCA10034179	110025000000	325910 Printing Ink Manufacturing	Import					Import	0	119808	119808	99786	89736	93290	1,000,000,000 ‚Äì <5,000,000,000	1,000,000,000 ‚Äì <5,000,000,000	1,000,000,000 ‚Äì <5,000,000,000	1,000,000,000 ‚Äì <5,000,000,000
1,2,3-Propanetriol	44.9733	-93.2753	721145	56-81-5	56815	CASRN	Target Corporation	1000 Nicollet Mall		Minneapolis	Hennepin	MN	55403	19-646-1180									TARGET CORP	1000 NICOLLET MALL		MINNEAPOLIS	HENNEPIN	MN	55403-2467	19-646-1180	TSCA127583	110009000000	453998 All Other Miscellaneous Store Retailers (Except Tobacco Stores)	Import					Import	0	879000	879000	387000	88900	81100	1,000,000,000 ‚Äì <5,000,000,000	1,000,000,000 ‚Äì <5,000,000,000	1,000,000,000 ‚Äì <5,000,000,000	1,000,000,000 ‚Äì <5,000,000,000
1,2,3-Propanetriol	45.0331	-93.0942	708779	56-81-5	56815	CASRN	3M COMPANY	3M CENTER, BUILDING 220-6E-03		ST. PAUL	Ramsey	MN	55144	00-617-3082									3M COMPANY	3M CENTER		ST PAUL	RAMSEY	MN	55144-1000	00-617-3082	100604318	110036000000	322220 Paper Bag And Coated And Treated Paper Manufacturing	Import	326113 Unlaminated Plastics Film And Sheet (Except Packaging) Manufacturing	Import	325520 Adhesive Manufacturing	Import	Import	CBI	CBI	CBI	CBI	CBI	CBI	1,000,000,000 ‚Äì <5,000,000,000	1,000,000,000 ‚Äì <5,000,000,000	1,000,000,000 ‚Äì <5,000,000,000	1,000,000,000 ‚Äì <5,000,000,000
1,2,3-Propanetriol	46.9682	-123.854	725564	56-81-5	56815	CASRN	REG	416 S. BELL AVENUE		AMES	Story	IA	50010	01-289-3898									REG GRAYS HARBOR, LLC	3122 PORT INDUSTRIAL RD		HOQUIAM	GRAYS HARBOR COUNTY	WA	98550	01-100-0934	TSCA120083	110030000000	325199 All Other Basic Organic Chemical Manufacturing	Manufacture					Manufacture	64928151	0	64928151	70913964	65057287	56585054	1,000,000,000 ‚Äì <5,000,000,000	1,000,000,000 ‚Äì <5,000,000,000	1,000,000,000 ‚Äì <5,000,000,000	1,000,000,000 ‚Äì <5,000,000,000
1,2,3-Propanetriol	47.6393	-122.357	741159	56-81-5	56815	CASRN	SILVER FERN CHEMICAL	2226 QUEEN ANNE AVENUE N.		SEATTLE	King	WA	98109	14-454-2433									Silver Fern Chemical	2226 Queen Anne Avenue North		Seattle		WA	98109	14-454-2433	TSCA8180	110057000000	424690 Other Chemical And Allied Products Merchant Wholesalers	Import					Import	0	661380	661380	672403	584219	611765	1,000,000,000 ‚Äì <5,000,000,000	1,000,000,000 ‚Äì <5,000,000,000	1,000,000,000 ‚Äì <5,000,000,000	1,000,000,000 ‚Äì <5,000,000,000
1,2,3-Propanetriol	47.6728	-122.107	738815	56-81-5	56815	CASRN	UNIVAR SOLUTIONS INC.	3075 Highland Pkwy., Ste. 200		Downers Grove	DuPage	IL	60515-5560	09-887-7053									UNIVAR SOLUTIONS USA INC	17411 NE UNION HILL RD.		REDMOND	KING COUNTY	WA	98052	10-297-1785	TSCA119921	110069000000	424690 Other Chemical And Allied Products Merchant Wholesalers	Import					Import	0	5481739	5481739	5558819	5888947	9836305	1,000,000,000 ‚Äì <5,000,000,000	1,000,000,000 ‚Äì <5,000,000,000	1,000,000,000 ‚Äì <5,000,000,000	1,000,000,000 ‚Äì <5,000,000,000
1,2,3-Propanetriol	48.0225	-100.885	731739	56-81-5	56815	CASRN	ARCHER DANIELS MIDLAND COMPANY	4666 E FARIES PARKWAY		DECATUR	MACON	IL	62526	00-130-7586									ADM-VELVA-PROCESSING	1388 HIGHWAY 97		VELVA	MCHENRY COUNTY	ND	58790	78-170-1222	TSCA5625	110001000000	311224 Soybean And Other Oilseed Processing	Manufacture	325199 All Other Basic Organic Chemical Manufacturing	Manufacture			Manufacture	20400000	0	20400000	18000000	19000000	27000000	1,000,000,000 ‚Äì <5,000,000,000	1,000,000,000 ‚Äì <5,000,000,000	1,000,000,000 ‚Äì <5,000,000,000	1,000,000,000 ‚Äì <5,000,000,000
1,2,3-Propanetriol, 1,2,3-triacetate	30.1546	-95.4631	736990	102-76-1	102761	CASRN	SHRIEVE CHEMICAL COMPANY, LLC	1755 WOODSTEAD COURT		THE WOODLANDS	Montgomery	TX	77380	09-397-2602									SHRIEVE CHEMICAL COMPANY, LLC	1755 WOODSTEAD CT		SPRING	MONTGOMERY COUNTY	TX	77380	09-397-2602	TSCA10051072	110071000000	325998 All Other Miscellaneous Chemical Product And Preparation Manufacturing	Both	424690 Other Chemical And Allied Products Merchant Wholesalers	Both							CBI	CBI	CBI	1,000,000 ‚Äì <20,000,000	100,000,000 ‚Äì <250,000,000	10,000,000 ‚Äì <50,000,000	10,000,000 ‚Äì <50,000,000
1,2,3-Propanetriol, 1,2,3-triacetate	36.5359	-82.5493	722398	102-76-1	102761	CASRN	EASTMAN CHEMICAL COMPANY, INC	200 SOUTH WILCOX DRIVE		KINGSPORT	Sullivan	TN	37660-5147	80-889-8381									EASTMAN CHEMICAL CO. B-280 OFF	200 SOUTH WILCOX DRIVE		KINGSPORT	SULLIVAN	TN	37660-5147	80-889-8381	TSCA4101	110057000000	325998 All Other Miscellaneous Chemical Product And Preparation Manufacturing	Withheld					CBI	CBI	CBI	CBI	CBI	CBI	CBI	1,000,000 ‚Äì <20,000,000	100,000,000 ‚Äì <250,000,000	10,000,000 ‚Äì <50,000,000	10,000,000 ‚Äì <50,000,000
1,2,3-Propanetriol, 1,2,3-triacetate	39.9517	-75.1832	733073	102-76-1	102761	CASRN	FMC Corporation	2929 Walnut Street		Philadelphia	Philadelphia	PA	19104	00-914-6945									FMC CORPORATION	2929 WALNUT ST		PHILADELPHIA	PHILADELPHIA COUNTY	PA	19104	00-914-6945	TSCA122201	110069000000	551114 Corporate, Subsidiary, And Regional Managing Offices	Withheld					CBI	CBI	CBI	CBI	CBI	CBI	CBI	1,000,000 ‚Äì <20,000,000	100,000,000 ‚Äì <250,000,000	10,000,000 ‚Äì <50,000,000	10,000,000 ‚Äì <50,000,000
1,2,3-Propanetriol, 1,2,3-triacetate	40.1315	-75.2737	718697	102-76-1	102761	CASRN	Acme-Hardesty CO A Division of Jacob Stern & Sons, Inc	450 Sentry Parkway	Suite 104	Blue Bell	Montgomery	PA	19422	78-319-5154									ACME-HARDESTY CO	450 SENTRY PKWY	SUITE 104	BLUE BELL	MONTGOMERY COUNTY	PA	19422	78-319-5154	TSCA10073359	110071000000	424690 Other Chemical And Allied Products Merchant Wholesalers	Import					Import	0	378291	378291	256074	121688	529	1,000,000 ‚Äì <20,000,000	100,000,000 ‚Äì <250,000,000	10,000,000 ‚Äì <50,000,000	10,000,000 ‚Äì <50,000,000
1,2,3-Propanetriol, 1,2,3-triacetate	40.2033	-75.0835	734120	102-76-1	102761	CASRN	Gehring-Montgomery, Inc.	710 Louis Drive		Warminster	Bucks	PA	18974	11-434-1357	TER HELL & CO GMBH	Borsenbrucke 2		Hamburg		20457	GM	11-434-1357	GEHRING MONTGOMERY	710 LOUIS DRIVE		WARMINSTER	BUCKS	PA	18974-2829	11-434-1357	100606008	110000000000	325998 All Other Miscellaneous Chemical Product And Preparation Manufacturing	Both					Import	0	42328	42328	84656	126984	84656	1,000,000 ‚Äì <20,000,000	100,000,000 ‚Äì <250,000,000	10,000,000 ‚Äì <50,000,000	10,000,000 ‚Äì <50,000,000
1,2,3-Propanetriol, 1,2,3-triacetate	40.4575	-80.1933	706993	102-76-1	102761	CASRN	LANXESS CORPORATION	111 RIDC PARK WEST DRIVE		PITTSBURGH	Allegheny	PA	15275	14-585-8770	LANXESS DEUTSCHLAND GMBH	Kennedyplatz 1		Koln		50569	GM	31-546-4482	LANXESS CORPORATION---PITTSBURGH	111 RIDC PARK WEST DR		PITTSBURGH	ALLEGHENY COUNTY	PA	15275-1112	14-585-8770	100606790	110024000000	325130 Synthetic Dye And Pigment Manufacturing	Import	325199 All Other Basic Organic Chemical Manufacturing	Import			Import	0	61223	61223	331862	208497	266865	1,000,000 ‚Äì <20,000,000	100,000,000 ‚Äì <250,000,000	10,000,000 ‚Äì <50,000,000	10,000,000 ‚Äì <50,000,000
1,2,3-Propanetriol, 1,2,3-triacetate	40.6801	-74.4319	726210	102-76-1	102761	CASRN	Vitusa Products	343 Snyder Ave		Berkeley Heights	Union	NJ	7922	19-570-2626									VITUSA PRODUCTS INC	343 SNYDER AVENUE		BERKELEY HEIGHTS	UNION	NJ	07922-1548	19-570-2626	TSCA9387	110022000000	424690 Other Chemical And Allied Products Merchant Wholesalers	Import					Import	0	1860106	1860106	15200023	18509932	17106215	1,000,000 ‚Äì <20,000,000	100,000,000 ‚Äì <250,000,000	10,000,000 ‚Äì <50,000,000	10,000,000 ‚Äì <50,000,000
1,2,3-Propanetriol, 1,2,3-triacetate	41.0977	-73.4166	715674	102-76-1	102761	CASRN	CBI	CBI	CBI	CBI	CBI	CBI	CBI	CBI	CBI	CBI	CBI	CBI	CBI	CBI	CBI	CBI	CHARKIT CHEMICAL COMPANY LLC	32 HAVILAND STREET		NORWALK	FAIRFIELD COUNTY	CT	6854	03-038-7427	100605177	110057000000	424690 Other Chemical And Allied Products Merchant Wholesalers	Import					Import	0	185892	185892	294182	179928	73335	1,000,000 ‚Äì <20,000,000	100,000,000 ‚Äì <250,000,000	10,000,000 ‚Äì <50,000,000	10,000,000 ‚Äì <50,000,000
1,2,3-Propanetriol, 1,2,3-triacetate	41.821	-87.9593	713602	102-76-1	102761	CASRN	HA INTERNATIONAL, LLC	630 OAKMONT LANE		WESTMONT	DuPage	IL	60559	02-881-2845	HTTENES-ALBERTUS CHEMISCHE WERKE GMBH	Wiesenstr. 23		Dusseldorf		40549	GM	31-656-6678	HA INTERNATIONAL LLC	630 OAKMONT LANE		WESTMONT	DUPAGE COUNTY	IL	60559-5548	02-881-2845	100603355	110012000000	325998 All Other Miscellaneous Chemical Product And Preparation Manufacturing	Import					Import	CBI	CBI	CBI	CBI	CBI	CBI	1,000,000 ‚Äì <20,000,000	100,000,000 ‚Äì <250,000,000	10,000,000 ‚Äì <50,000,000	10,000,000 ‚Äì <50,000,000
1,2,3-Propanetriol, 1,2,3-triacetate	42.1191	-88.2839	716924	102-76-1	102761	CASRN	POLYNT COMPOSITES USA, INC	99 COTTAGE AVENUE		CARPENTERSVILLE	KANE	IL	60110	96-825-9981									POLYNT COMPOSITES USA, INC	99 E COTTAGE AVE		CARPENTERSVILLE	KANE COUNTY	IL	60110	96-825-9981	TSCA10021424	110071000000	325211 Plastics Material And Resin Manufacturing	Both					Import	0	119016	119016	0	241206	522612	1,000,000 ‚Äì <20,000,000	100,000,000 ‚Äì <250,000,000	10,000,000 ‚Äì <50,000,000	10,000,000 ‚Äì <50,000,000
1,2,3-Propanetriol, 1,2,3-triacetate	43.0975	-88.0606	722053	102-76-1	102761	CASRN	BRENNTAG GREAT LAKES, LLC	P.O. BOX 444		BUTLER	Milwaukee	WI	53007	04-245-4228	BRENNTAG AG	Messeallee 11		Essen		45131	GM	50-709-1739	BRENNTAG GREAT LAKES, LLC - WAUWATOSA WAREHOUSE	4420 N HARLEY DAVIDSON AVE		WAUWATOSA	MILWAUKEE COUNTY	WI	53226	04-245-4228	100601681	110019000000	424690 Other Chemical And Allied Products Merchant Wholesalers	Import					Import	0	77414	77414	78292	171240	190440	1,000,000 ‚Äì <20,000,000	100,000,000 ‚Äì <250,000,000	10,000,000 ‚Äì <50,000,000	10,000,000 ‚Äì <50,000,000
1,2,3-Propanetriol, 1,2,3-triacetate	43.615	-84.1987	737912	102-76-1	102761	CASRN	The Dow Chemical Co	2211 H.H. Dow Way		Midland	Midland	MI	48674	08-036-1339									THE DOW CHEMICAL CO	2211 H.H. DOW WAY		MIDLAND	MIDLAND COUNTY	MI	48674	08-036-1339	TSCA10057799	110071000000	325199 All Other Basic Organic Chemical Manufacturing	Import	325211 Plastics Material And Resin Manufacturing	Import			Import	CBI	CBI	CBI	CBI	CBI	CBI	1,000,000 ‚Äì <20,000,000	100,000,000 ‚Äì <250,000,000	10,000,000 ‚Äì <50,000,000	10,000,000 ‚Äì <50,000,000
1,2,3-Propanetriol, 1,2,3-tribenzoate	36.0402	-79.7786	717471	614-33-5	614335	CASRN	LANXESS CORPORATION	111 RIDC PARK WEST DRIVE		PITTSBURGH	Allegheny	PA	15275	14-585-8770	LANXESS DEUTSCHLAND GMBH	Kennedyplatz 1		Koln		50569	GM	31-546-4482	LANXESS CORPORATION GREENSBORO	520 BROOME RD.		GREENSBORO	GUILFORD COUNTY	NC	27406-3799	06-179-5696	100608461	110000000000	325199 All Other Basic Organic Chemical Manufacturing	Manufacture					Manufacture	74498	0	74498	148115	81853	162603	74498	148115	81853	162603
1,2,3-Propanetriol, 1,2,3-trinitrate	30.1864	-84.2201	727947	55-63-0	55630	CASRN	General Dynamics	2941 Fairview Park Drive		Falls Church	Fairfax	VA	22042	00-138-1284									SAINT MARKS POWDER INCORPORATED	US HIGHWAY 98 & STATE ROUTE 363		SAINT MARKS	WAKULLA	FL	32355	02-122-3743	TSCA5299	110001000000	325920 Explosives Manufacturing	Manufacture					Manufacture	3902680	0	3902680	3656542	4318091	5229353	1,000,000 ‚Äì <10,000,000	1,000,000 ‚Äì <10,000,000	1,000,000 ‚Äì <10,000,000	1,000,000 ‚Äì <10,000,000
1,2,3-Propanetriol, 1,2,3-trinitrate	37.1529	-94.3805	710890	55-63-0	55630	CASRN	Dyno Nobel	6440 S. Millrock Drive		Cottonwood Heights	UT	UT	84121	00-909-1257									DYNO NOBEL, INC.	17562 GUM ROAD		CARTHAGE		MO	64836	00-909-1257	200001555	110013000000	325920 Explosives Manufacturing						Manufacture	1911632	0	1911632	2595455	2176428	1715400	1,000,000 ‚Äì <10,000,000	1,000,000 ‚Äì <10,000,000	1,000,000 ‚Äì <10,000,000	1,000,000 ‚Äì <10,000,000
1,2,3-Propanetriol, 1,2,3-trinitrate	37.1696	-80.5384	728753	55-63-0	55630	CASRN	BAE Systems, Ordnance Systems Inc.	Radford Army Ammunition Plant	PO Box 1	RADFORD	Montgomery County	VA	24143	04-947-8725									BAE SYSTEMS	4050 PEPPERS FERRY ROAD		RADFORD		VA	24141	07-837-5499	TSCA128365	110067000000	325920 Explosives Manufacturing	Both					Manufacture	2456939	0	2456939	2384054	2172274	2732132	1,000,000 ‚Äì <10,000,000	1,000,000 ‚Äì <10,000,000	1,000,000 ‚Äì <10,000,000	1,000,000 ‚Äì <10,000,000
1,2,3-Propanetriol, 1,2,3-trinitrate	37.1825	-80.5362	723393	55-63-0	55630	CASRN	Northrop Grumman Corporation	2980 Fairview Park Drive		Falls Church	Fairfax	VA	22042	61-870-5925									RADFORD ARMY AMMUNITION PLANT	415 CONSTITUTION RD		RADFORD	MONTGOMERY COUNTY	VA	24141	93-380-0377	TSCA5123	110001000000	325920 Explosives Manufacturing	Import					Import	0	31110	31110	9893	18114	22069	1,000,000 ‚Äì <10,000,000	1,000,000 ‚Äì <10,000,000	1,000,000 ‚Äì <10,000,000	1,000,000 ‚Äì <10,000,000
1,2,3-Propanetriol, diacetate	40.6418	-74.2199	730787	25395-31-7	25395317	CASRN	The Rotuba Extruders, Inc	1301 S Park Avenue		Linden	Union	NJ	7036	00-121-2141									THE ROTUBA EXTRUDERS, INC.	1301 S PARK AVE		LINDEN	UNION COUNTY	NJ	7036	00-121-2141	TSCA10053012	110071000000	325991 Custom Compounding Of Purchased Resins	Manufacture					Import	0	27509	27509	25392	23156	18230	27509	68382	88368	43010
1,2,3-Propanetriol, diacetate	41.0977	-73.4166	715701	25395-31-7	25395317	CASRN	CBI	CBI	CBI	CBI	CBI	CBI	CBI	CBI	CBI	CBI	CBI	CBI	CBI	CBI	CBI	CBI	CHARKIT CHEMICAL COMPANY LLC	32 HAVILAND STREET		NORWALK	FAIRFIELD COUNTY	CT	6854	03-038-7427	100605177	110057000000	424690 Other Chemical And Allied Products Merchant Wholesalers	Import						0	0	0	42990	65212	24780	27509	68382	88368	43010
1,2,3-Propanetriol, homopolymer, dodecanoate	34.9873	-80.5565	712816	74504-64-6	74504646	CASRN	GOULSTON TECHNOLOGIES	PO BOX 5025		MONROE	Union	NC	28111-5025	00-104-7786									GOULSTON TECHNOLOGIES	700 NORTH JOHNSON STREET		MONROE	UNION COUNTY	NC	28110-2650	00-104-7786	100602123	110000000000	325998 All Other Miscellaneous Chemical Product And Preparation Manufacturing	Both						0	0	0	0	3175	36112	0	0	3175	36112
1,2,3-Propanetriol, mono- and diformates	34.949	-80.9808	713465	1410795-90-2	1410795902	CASRN	Rudolf Venture Chemical	2199 Burkett Rd		Rock Hill	SC	SC	29730	87-268-5131	RUDOLF GMBH	Altvaterstr 58-64		GERETSRIED		82538	GM	31-557-8666	RUDOLF VENTURE CHEMICAL INC	2199 BURKETTE RD		ROCK HILL	YORK COUNTY	SC	29730	87-268-5131	TSCA9274	110038000000	325998 All Other Miscellaneous Chemical Product And Preparation Manufacturing	Manufacture					Import	0	8488	8488	3395	0	0	8488	3395	0	0
1,2,4,5,7,8-Hexoxonane, 3,6,9-triethyl-3,6,9-trimethyl-	29.6394	-95.0628	700242	24748-23-0	24748230	CASRN	NOURYON FUNCTIONAL CHEMICALS LLC	131 S. DEARBORN ST	SUITE 1000	CHICAGO	Cook	IL	60603	11-713-4378									NOURYON FUNCTIONAL CHEMICALS LLC	12900 BAY PARK ROAD		PASADENA	HARRIS COUNTY	TX	77507	96-896-5884	TSCA5466	110044000000	325199 All Other Basic Organic Chemical Manufacturing	Manufacture					Manufacture	CBI	CBI	CBI	CBI	CBI	CBI	<1,000,000	<1,000,000	<1,000,000	<1,000,000
1,2,4,5-Benzenetetracarboxylic acid, 1,2,4,5-tetrakis(2-ethylhexyl) ester	33.0923	-83.278	701196	3126-80-5	3126805	CASRN	ZSCHIMMER&SCHWARZ	70 GA HWY 22 W		MILLEDGEVILLE	BALDWIN	GA	31059	07-205-7511									ZSCHIMMER & SCHWARZ INC	70 GA HWY 22 W		MILLEDGEVILLE	BALDWIN	GA	31061-6606	07-205-7511	100608699	110021000000	325613 Surface Active Agent Manufacturing	Manufacture					Manufacture	646044	0	646044	466979	53142	0	646044	466979	53142	0
1,2,4,5-Benzenetetracarboxylic acid, compd. with 4,5-dihydro-2-phenyl-1H-imidazole (1:1)	40.8126	-73.6637	721299	54553-90-1	54553901	CASRN	Aceto US, LLC	4 Tri Harbor Court		Port Washington	Nassau	NY	11050	11-704-8781									ACETO US, LLC	4 TRI HARBOR CT		PORT WASHINGTON	NASSAU COUNTY	NY	11050	11-704-8781	TSCA10047894	110071000000	424210 Drugs And Druggists' Sundries Merchant Wholesalers	Import					Import	CBI	CBI	CBI	0	0	0	100,000 ‚Äì <500,000	<1,000,000	<1,000,000	<1,000,000
1,2,4,5-Benzenetetracarboxylic acid, compd. with 4,5-dihydro-2-phenyl-1H-imidazole (1:1)	40.8956	-74.7283	737375	54553-90-1	54553901	CASRN	DKSH North America, Inc	350 Clark Drive	Suite 325	Mount Olive	Morris	NJ	7828	14-492-1483	DKSH HOLDING AG	Wiesentrasse 8		Zurich		8008	SZ	48-000-8127	DKSH NORTH AMERICA, INC.	350 CLARK DRIVE	SUITE 325	MOUNT OLIVE	MORRIS COUNTY	NJ	7828	14-492-1483	TSCA10021793	110070000000	424690 Other Chemical And Allied Products Merchant Wholesalers	Import					Import	CBI	CBI	CBI	CBI	CBI	CBI	100,000 ‚Äì <500,000	<1,000,000	<1,000,000	<1,000,000
1,2,4,5-Benzenetetracarboxylic acid, compd. with 4,5-dihydro-2-phenyl-1H-imidazole (1:1)	42.9099	-85.6111	729611	54553-90-1	54553901	CASRN	Aalborz Chemical LLC	2240 29th Street SE		Grand Rapids	Kent	MI	49508	11-707-3796									AALBORZ CHEMICAL LLC	2240 29TH ST SE		GRAND RAPIDS	KENT COUNTY	MI	49508	11-707-3796	TSCA10022610	110070000000	424690 Other Chemical And Allied Products Merchant Wholesalers	Import					Import	0	96120	96120	317007	251313	5291	100,000 ‚Äì <500,000	<1,000,000	<1,000,000	<1,000,000
1,2,4,5-Benzenetetracarboxylic acid, compd. with 4,5-dihydro-2-phenyl-1H-imidazole (1:2)	40.7168	-74.0357	726274	54553-91-2	54553912	CASRN	CHORI AMERICA, INC.	30 MONTGOMERY STREET	Suite 1230	JERSEY CITY	Hudson	NJ	7302	00-170-8841									30 MONTGOMERY STREET OFFICE BUILDING	30 MONTGOMERY ST		JERSEY CITY	HUDSON COUNTY	NJ	7302	00-170-8841	TSCA8137	110015000000	424690 Other Chemical And Allied Products Merchant Wholesalers	Import					Import	CBI	CBI	CBI	CBI	CBI	CBI	100,000 ‚Äì <500,000	<1,000,000	<1,000,000	<1,000,000
1,2,4,5-Benzenetetracarboxylic acid, compd. with 4,5-dihydro-2-phenyl-1H-imidazole (1:2)	40.8126	-73.6637	721300	54553-91-2	54553912	CASRN	Aceto US, LLC	4 Tri Harbor Court		Port Washington	Nassau	NY	11050	11-704-8781									ACETO US, LLC	4 TRI HARBOR CT		PORT WASHINGTON	NASSAU COUNTY	NY	11050	11-704-8781	TSCA10047894	110071000000	424210 Drugs And Druggists' Sundries Merchant Wholesalers	Import					Import	CBI	CBI	CBI	0	0	0	100,000 ‚Äì <500,000	<1,000,000	<1,000,000	<1,000,000
1,2,4,5-Benzenetetracarboxylic acid, compd. with 4,5-dihydro-2-phenyl-1H-imidazole (1:2)	40.8956	-74.7283	737376	54553-91-2	54553912	CASRN	DKSH North America, Inc	350 Clark Drive	Suite 325	Mount Olive	Morris	NJ	7828	14-492-1483	DKSH HOLDING AG	Wiesentrasse 8		Zurich		8008	SZ	48-000-8127	DKSH NORTH AMERICA, INC.	350 CLARK DRIVE	SUITE 325	MOUNT OLIVE	MORRIS COUNTY	NJ	7828	14-492-1483	TSCA10021793	110070000000	424690 Other Chemical And Allied Products Merchant Wholesalers	Import					Import	CBI	CBI	CBI	CBI	CBI	CBI	100,000 ‚Äì <500,000	<1,000,000	<1,000,000	<1,000,000
1,2,4-Benzenetricarboxylic acid	42.5362	-71.1598	732009	528-44-9	528449	CASRN	DSM Holding Company, Inc.	45 waterview Blvd.		Parsippany	Morris County	NJ	7054	82-502-9234									DSM COATING RESINS, INC.	730 MAIN ST		WILMINGTON	MIDDLESEX COUNTY	MA	1887	11-235-9323	TSCA110682	110069000000	325211 Plastics Material And Resin Manufacturing	Import					Import	0	289	289	28196	10488	1	289	28196	10488	1
1,2,4-Benzenetricarboxylic acid, 1,2,4-trihexyl ester	36.0599	-79.8285	718194	1528-49-0	1528490	CASRN	VERTELLUS LLC	201 NORTH ILLINOIS STREET	Suite 1800	INDIANAPOLIS	Marion	IN	46204	07-934-5010									VERTELLUS GREENSBORO LLC	2110 HIGH POINT RD.		GREENSBORO	GUILFORD COUNTY	NC	27403	08-048-4759	TSCA9666	110000000000	325199 All Other Basic Organic Chemical Manufacturing	Both					Manufacture	CBI	CBI	CBI	CBI	CBI	CBI	<1,000,000	<1,000,000	<1,000,000	<1,000,000
1,2,4-Benzenetricarboxylic acid, 1,2,4-triisodecyl ester	33.0923	-83.278	701202	36631-30-8	36631308	CASRN	ZSCHIMMER&SCHWARZ	70 GA HWY 22 W		MILLEDGEVILLE	BALDWIN	GA	31059	07-205-7511									ZSCHIMMER & SCHWARZ INC	70 GA HWY 22 W		MILLEDGEVILLE	BALDWIN	GA	31061-6606	07-205-7511	100608699	110021000000	325613 Surface Active Agent Manufacturing	Manufacture					Manufacture	133363	0	133363	112593	198265	130520	1,000,000 ‚Äì <10,000,000	500,000 ‚Äì <1,000,000	500,000 ‚Äì <1,000,000	1,000,000 ‚Äì <10,000,000
1,2,4-Benzenetricarboxylic acid, 1,2,4-triisodecyl ester	35.6076	-89.2377	722202	36631-30-8	36631308	CASRN	TEKNOR APEX	505 Central Ave		Pawtucket	Providence	RI	2861	04-536-7968									TEKNOR APEX TENNESSEE CO (AKA HAYWOOD CO)	751 DUPREE STREET		BROWNSVILLE	HAYWOOD COUNTY	TN	38012-1708	05-487-6834	100602605	110000000000	325199 All Other Basic Organic Chemical Manufacturing	Manufacture					Manufacture	CBI	CBI	CBI	CBI	CBI	CBI	1,000,000 ‚Äì <10,000,000	500,000 ‚Äì <1,000,000	500,000 ‚Äì <1,000,000	1,000,000 ‚Äì <10,000,000
1,2,4-Benzenetricarboxylic acid, 1,2,4-triisodecyl ester	40.5056	-74.3398	712246	36631-30-8	36631308	CASRN	CRODA INC.	300-A COLUMBUS CIRCLE		EDISON	Middlesex	NJ	8837	00-133-1032									CRODA INC @ RARITAN CENTER	300 COLUMBUS CIR		EDISON	MIDDLESEX COUNTY	NJ	8837	00-133-1032	TSCA9398	110043000000	325998 All Other Miscellaneous Chemical Product And Preparation Manufacturing	Import					Import	0	213716	213716	12566	60318	20525	1,000,000 ‚Äì <10,000,000	500,000 ‚Äì <1,000,000	500,000 ‚Äì <1,000,000	1,000,000 ‚Äì <10,000,000
1,2,4-Benzenetricarboxylic acid, 1,2,4-triisodecyl ester	40.5252	-74.3194	717728	36631-30-8	36631308	CASRN	LANXESS CORPORATION	111 RIDC PARK WEST DRIVE		PITTSBURGH	Allegheny	PA	15275	14-585-8770	LANXESS DEUTSCHLAND GMBH	Kennedyplatz 1		Koln		50569	GM	31-546-4482	LANXESS SOLUTIONS US, INC---FORDS	1020 KING GEORGES POST ROAD		FORDS	MIDDLESEX COUNTY	NJ	08863-2329	82-864-7953	200002180	110006000000	325199 All Other Basic Organic Chemical Manufacturing	Manufacture					Manufacture	CBI	0	CBI	CBI	CBI	CBI	1,000,000 ‚Äì <10,000,000	500,000 ‚Äì <1,000,000	500,000 ‚Äì <1,000,000	1,000,000 ‚Äì <10,000,000
1,2,4-Benzenetricarboxylic acid, 1,2,4-triisodecyl ester	41.3944	-74.341	739858	36631-30-8	36631308	CASRN	BLASER SWISSLUBE INC.	31 HATFIELD LANE		GOSHEN	Orange	NY	10924	80-170-1368									BLASER SWISSLUBE	31 HATFIELD LANE, WESTGATE INDUSTRIAL PARK		GOSHEN	ORANGE COUNTY	NY	10924	80-170-1368	200000636	110013000000	324191 Petroleum Lubricating Oil And Grease Manufacturing	Manufacture					Import	CBI	CBI	CBI	CBI	CBI	CBI	1,000,000 ‚Äì <10,000,000	500,000 ‚Äì <1,000,000	500,000 ‚Äì <1,000,000	1,000,000 ‚Äì <10,000,000
1,2,4-Benzenetricarboxylic acid, 1,2,4-triisononyl ester	33.8247	-118.236	741045	53894-23-8	53894238	CASRN	GEON Performance Solutions LLC	25777 Detroit Road, Suite 202		Westlake	Cuyahoga	OH	44145	11-724-7947	SK ECHO HOLDINGS S R L	6 rue Eugne Ruppert		Luxembourg		L 2453	LU	37-176-4800	GEON PERFORMANCE SOLUTIONS LLC	2104 E 223RD ST		LONG BEACH	LOS ANGELES COUNTY	CA	90810	11-732-9691	TSCA6526	110000000000	325211 Plastics Material And Resin Manufacturing	Both						0	0	0	33700	0	0	20,000,000 ‚Äì <100,000,000	20,000,000 ‚Äì <100,000,000	20,000,000 ‚Äì <100,000,000	20,000,000 ‚Äì <100,000,000
1,2,4-Benzenetricarboxylic acid, 1,2,4-triisononyl ester	35.6076	-89.2377	722204	53894-23-8	53894238	CASRN	TEKNOR APEX	505 Central Ave		Pawtucket	Providence	RI	2861	04-536-7968									TEKNOR APEX TENNESSEE CO (AKA HAYWOOD CO)	751 DUPREE STREET		BROWNSVILLE	HAYWOOD COUNTY	TN	38012-1708	05-487-6834	100602605	110000000000	325199 All Other Basic Organic Chemical Manufacturing	Manufacture					Manufacture	CBI	CBI	CBI	CBI	CBI	CBI	20,000,000 ‚Äì <100,000,000	20,000,000 ‚Äì <100,000,000	20,000,000 ‚Äì <100,000,000	20,000,000 ‚Äì <100,000,000
1,2,4-Benzenetricarboxylic acid, 1,2,4-triisononyl ester	38.222	-85.8298	702120	53894-23-8	53894238	CASRN	GEON Performance Solutions LLC	25777 Detroit Road, Suite 202		Westlake	Cuyahoga	OH	44145	11-724-7947	SK ECHO HOLDINGS S R L	6 rue Eugne Ruppert		Luxembourg		L 2453	LU	37-176-4800	GEON PERFORMANCE SOLUTIONS LLC	4250 BELLS LN		LOUISVILLE	JEFFERSON COUNTY	KY	40211	80-104-0098	TSCA6525	110040000000	325211 Plastics Material And Resin Manufacturing	Both					Import	0	39600	39600	5900	0	0	20,000,000 ‚Äì <100,000,000	20,000,000 ‚Äì <100,000,000	20,000,000 ‚Äì <100,000,000	20,000,000 ‚Äì <100,000,000
1,2,4-Benzenetricarboxylic acid, 1,2,4-triisononyl ester	41.3713	-82.138	704163	53894-23-8	53894238	CASRN	GEON Performance Solutions LLC	25777 Detroit Road, Suite 202		Westlake	Cuyahoga	OH	44145	11-724-7947	SK ECHO HOLDINGS S R L	6 rue Eugne Ruppert		Luxembourg		L 2453	LU	37-176-4800	GEON PERFORMANCE SOLUTIONS LLC	1406 LOWELL ST		ELYRIA	LORAIN COUNTY	OH	44035	96-723-1155	TSCA10057931	110071000000	424610 Plastics Materials And Basic Forms And Shapes Merchant Wholesalers	Both					Import	0	39600	39600	0	0	0	20,000,000 ‚Äì <100,000,000	20,000,000 ‚Äì <100,000,000	20,000,000 ‚Äì <100,000,000	20,000,000 ‚Äì <100,000,000
1,2,4-Benzenetricarboxylic acid, 1,2,4-triisononyl ester	41.3753	-82.1402	708688	53894-23-8	53894238	CASRN	POLYONE CORPORATION	33587 WALKER ROAD		AVON LAKE	Lorain	OH	44012	84-508-2861									Elyria Distribution Ctr.	1404 Lowell Street		Elyria		OH	44035	11-724-7947	TSCA6537	110057000000	424610 Plastics Materials And Basic Forms And Shapes Merchant Wholesalers	Import					Import	0	128829	128829	291351	221982	257657	20,000,000 ‚Äì <100,000,000	20,000,000 ‚Äì <100,000,000	20,000,000 ‚Äì <100,000,000	20,000,000 ‚Äì <100,000,000
1,2,4-Benzenetricarboxylic acid, 1,2,4-triisononyl ester	44.8411	-93.1398	701683	53894-23-8	53894238	CASRN	POLYONE CORPORATION	33587 WALKER ROAD		AVON LAKE	Lorain	OH	44012	84-508-2861									POLY ONE	3160 NEIL ARMSTRONG DR		EAGAN	DAKOTA COUNTY	MN	55121-3498	88-464-8452	TSCA6534	110014000000	424610 Plastics Materials And Basic Forms And Shapes Merchant Wholesalers	Import					Import	0	80294	80294	100002	122692	121172	20,000,000 ‚Äì <100,000,000	20,000,000 ‚Äì <100,000,000	20,000,000 ‚Äì <100,000,000	20,000,000 ‚Äì <100,000,000
1,2,4-Benzenetricarboxylic acid, 1,2,4-triisotridecyl ester	33.0923	-83.278	701246	72361-35-4	72361354	CASRN	ZSCHIMMER&SCHWARZ	70 GA HWY 22 W		MILLEDGEVILLE	BALDWIN	GA	31059	07-205-7511									ZSCHIMMER & SCHWARZ INC	70 GA HWY 22 W		MILLEDGEVILLE	BALDWIN	GA	31061-6606	07-205-7511	100608699	110021000000	325613 Surface Active Agent Manufacturing	Manufacture					Manufacture	285884	0	285884	228431	403950	110073	500,000 ‚Äì <1,000,000	500,000 ‚Äì <1,000,000	500,000 ‚Äì <1,000,000	500,000 ‚Äì <1,000,000
1,2,4-Benzenetricarboxylic acid, 1,2,4-triisotridecyl ester	35.6076	-89.2377	722214	72361-35-4	72361354	CASRN	TEKNOR APEX	505 Central Ave		Pawtucket	Providence	RI	2861	04-536-7968									TEKNOR APEX TENNESSEE CO (AKA HAYWOOD CO)	751 DUPREE STREET		BROWNSVILLE	HAYWOOD COUNTY	TN	38012-1708	05-487-6834	100602605	110000000000	325199 All Other Basic Organic Chemical Manufacturing	Manufacture					Manufacture	CBI	CBI	CBI	CBI	CBI	CBI	500,000 ‚Äì <1,000,000	500,000 ‚Äì <1,000,000	500,000 ‚Äì <1,000,000	500,000 ‚Äì <1,000,000
1,2,4-Benzenetricarboxylic acid, 1,2,4-triisotridecyl ester	40.5056	-74.3398	712273	72361-35-4	72361354	CASRN	CRODA INC.	300-A COLUMBUS CIRCLE		EDISON	Middlesex	NJ	8837	00-133-1032									CRODA INC @ RARITAN CENTER	300 COLUMBUS CIR		EDISON	MIDDLESEX COUNTY	NJ	8837	00-133-1032	TSCA9398	110043000000	325998 All Other Miscellaneous Chemical Product And Preparation Manufacturing	Import					Import	0	326803	326803	27646	217816	102625	500,000 ‚Äì <1,000,000	500,000 ‚Äì <1,000,000	500,000 ‚Äì <1,000,000	500,000 ‚Äì <1,000,000
1,2,4-Benzenetricarboxylic acid, 1,2,4-triisotridecyl ester	40.5252	-74.3194	717748	72361-35-4	72361354	CASRN	LANXESS CORPORATION	111 RIDC PARK WEST DRIVE		PITTSBURGH	Allegheny	PA	15275	14-585-8770	LANXESS DEUTSCHLAND GMBH	Kennedyplatz 1		Koln		50569	GM	31-546-4482	LANXESS SOLUTIONS US, INC---FORDS	1020 KING GEORGES POST ROAD		FORDS	MIDDLESEX COUNTY	NJ	08863-2329	82-864-7953	200002180	110006000000	325199 All Other Basic Organic Chemical Manufacturing	Manufacture					Manufacture	CBI	0	CBI	CBI	CBI	CBI	500,000 ‚Äì <1,000,000	500,000 ‚Äì <1,000,000	500,000 ‚Äì <1,000,000	500,000 ‚Äì <1,000,000
1,2,4-Benzenetricarboxylic acid, 1,2,4-trimethyl ester	30.6133	-91.2333	715648	1959-10-01	2459101	CASRN	BASF Corp	100 Park Ave		Florham Park	Morris	NJ	7932	00-130-7032	BASF SE	Carl-Bosch-Str-38		Ludwigshafen		67056	GM	31-500-0554	BASF CORP	111 W IRENE RD		ZACHARY	EAST BATON ROUGE PARISH	LA	70791	05-685-6650	TSCA122967	110070000000	325199 All Other Basic Organic Chemical Manufacturing	Withheld					CBI	CBI	CBI	CBI	CBI	CBI	CBI	<1,000,000	<1,000,000	<1,000,000	<1,000,000
1,2,4-Benzenetricarboxylic acid, 1,2,4-trioctyl ester	29.7375	-95.4606	702708	89-04-3	89043	CASRN	WESTLAKE CHEMICAL CORPORATION	2801 POST OAK BOULEVARD, SUITE 600		HOUSTON	HARRIS COUNTY	TX	77056	78-391-8485									WESTLAKE COMPOUNDS MEXICO S. DE R.L. DE C.V.	2801 POST OAK BLVD	SUITE 600	HOUSTON	HARRIS COUNTY	TX	77056	81-459-0600	TSCA10058151	110071000000	325991 Custom Compounding Of Purchased Resins	Import					Import	CBI	CBI	CBI	CBI	CBI	CBI	1,000,000 ‚Äì <20,000,000	1,000,000 ‚Äì <20,000,000	1,000,000 ‚Äì <20,000,000	1,000,000 ‚Äì <20,000,000
1,2,4-Benzenetricarboxylic acid, 1,2,4-trioctyl ester	41.1791	-83.6691	707882	89-04-3	89043	CASRN	POLYONE CORPORATION	33587 WALKER ROAD		AVON LAKE	Lorain	OH	44012	84-508-2861									POLYONE CORP NORTH BALTIMORE	733 EAST WATER STREET		NORTH BALTIMORE	WOOD	OH	45872-1434	15-039-1902	100607535	110000000000	325510 Paint And Coating Manufacturing	Import									44157	134273	150467	1,000,000 ‚Äì <20,000,000	1,000,000 ‚Äì <20,000,000	1,000,000 ‚Äì <20,000,000	1,000,000 ‚Äì <20,000,000
1,2,4-Benzenetricarboxylic acid, 1,2,4-trioctyl ester	41.3753	-82.1402	708696	89-04-3	89043	CASRN	POLYONE CORPORATION	33587 WALKER ROAD		AVON LAKE	Lorain	OH	44012	84-508-2861									Elyria Distribution Ctr.	1404 Lowell Street		Elyria		OH	44035	11-724-7947	TSCA6537	110057000000	424610 Plastics Materials And Basic Forms And Shapes Merchant Wholesalers	Import					Import	0	23797	23797	148657	166497	136767	1,000,000 ‚Äì <20,000,000	1,000,000 ‚Äì <20,000,000	1,000,000 ‚Äì <20,000,000	1,000,000 ‚Äì <20,000,000
1,2,4-Benzenetricarboxylic acid, 1,2,4-tris(2-ethylhexyl) ester	26.7133	-80.0516	714886	3319-31-1	3319311	CASRN	GREENCHEM INDUSTRIES LLC	222 CLEMATIS STREET	Suite 207	WEST PALM BEACH	Palm Beach	FL	33401	80-577-2717									GREENCHEM	222 CLEMATIS ST	SUITE 207	WEST PALM BEACH	PALM BEACH COUNTY	FL	33401	80-577-2717	TSCA124127	110070000000	424690 Other Chemical And Allied Products Merchant Wholesalers						Import	CBI	CBI	CBI	CBI	CBI	CBI	50,000,000 ‚Äì <100,000,000	50,000,000 ‚Äì <100,000,000	50,000,000 ‚Äì <100,000,000	50,000,000 ‚Äì <100,000,000
1,2,4-Benzenetricarboxylic acid, 1,2,4-tris(2-ethylhexyl) ester	29.7375	-95.4606	741264	3319-31-1	3319311	CASRN	WESTLAKE CHEMICAL CORPORATION	2801 POST OAK BOULEVARD, SUITE 600		HOUSTON	Harris	TX	77056	78-391-8485									AXIALL, LLC	2801 POST OAK BLVD	SUITE 600	HOUSTON	HARRIS COUNTY	TX	77056	12-095-7840	TSCA10057985	110071000000	325180 Other Basic Inorganic Chemical Manufacturing	Withheld	325211 Plastics Material And Resin Manufacturing	Withheld	325199 All Other Basic Organic Chemical Manufacturing	Withheld	CBI	CBI	CBI	CBI	CBI	CBI	CBI	50,000,000 ‚Äì <100,000,000	50,000,000 ‚Äì <100,000,000	50,000,000 ‚Äì <100,000,000	50,000,000 ‚Äì <100,000,000
1,2,4-Benzenetricarboxylic acid, 1,2,4-tris(2-ethylhexyl) ester	29.7459	-95.4577	719885	3319-31-1	3319311	CASRN	Tribute Energy, Inc.	2100 W. Loop South	Suite 1500	Houston	Harris	TX	77027	80-823-8484									TRIBUTE ENERGY, INC.	2100 WEST LOOP S	SUITE 1500	HOUSTON	HARRIS COUNTY	TX	77027	80-823-8484	TSCA10079939	110071000000	424690 Other Chemical And Allied Products Merchant Wholesalers	Import					Import	0	44092	44092	0	0	0	50,000,000 ‚Äì <100,000,000	50,000,000 ‚Äì <100,000,000	50,000,000 ‚Äì <100,000,000	50,000,000 ‚Äì <100,000,000
1,2,4-Benzenetricarboxylic acid, 1,2,4-tris(2-ethylhexyl) ester	29.7772	-95.5604	734259	3319-31-1	3319311	CASRN	ITOCHU International Inc.	1251 Avenue of the Americas		New York	New York	NY	10020	00-698-5956									ITOCHU CHEMICALS AMERICA INC.	750 TOWN AND COUNTRY BLVD	SUITE 600	HOUSTON	HARRIS COUNTY	TX	77024	61-628-1965	TSCA10057226	110071000000	424690 Other Chemical And Allied Products Merchant Wholesalers	Import									1444740	3677520	2364120	50,000,000 ‚Äì <100,000,000	50,000,000 ‚Äì <100,000,000	50,000,000 ‚Äì <100,000,000	50,000,000 ‚Äì <100,000,000
1,2,4-Benzenetricarboxylic acid, 1,2,4-tris(2-ethylhexyl) ester	29.7795	-95.6256	703944	3319-31-1	3319311	CASRN	OQ CHEMICALS CORPORATION	15375 MEMORIAL DRIVE	Suite 300	HOUSTON	HARRIS COUNTY	TX	77079	79-228-3405									OQ CHEMICALS CORPORATION	15375 MEMORIAL DR	SUITE 300	HOUSTON	HARRIS COUNTY	TX	77079	79-228-3405	TSCA10058404	110071000000	325199 All Other Basic Organic Chemical Manufacturing	Import									CBI	CBI	CBI	50,000,000 ‚Äì <100,000,000	50,000,000 ‚Äì <100,000,000	50,000,000 ‚Äì <100,000,000	50,000,000 ‚Äì <100,000,000
1,2,4-Benzenetricarboxylic acid, 1,2,4-tris(2-ethylhexyl) ester	33.85	-84.3755	730280	3319-31-1	3319311	CASRN	LG CHEM AMERICA, INC.	3475 PIEDMONT ROAD NE, SUITE 1200		ATLANTA	Fulton	GA	30305	19-465-5882	LG CHEM LTD	128, Yeoui-daero, Yeongdeungpo-gu		Seoul		7336	KS	69-512-8893	LG CHEM AMERICA, INC.	3475 PIEDMONT RD NE		ATLANTA	FULTON COUNTY	GA	30305	19-465-5882	TSCA99702	110067000000	424690 Other Chemical And Allied Products Merchant Wholesalers										CBI	CBI	CBI	50,000,000 ‚Äì <100,000,000	50,000,000 ‚Äì <100,000,000	50,000,000 ‚Äì <100,000,000	50,000,000 ‚Äì <100,000,000
1,2,4-Benzenetricarboxylic acid, 1,2,4-tris(2-ethylhexyl) ester	35.1022	-80.8867	739837	3319-31-1	3319311	CASRN	MEXICHEM SPECIALTY COMPOUNDS INC dba ALPHAGARY CORP	170 PIONEER DR		LEOMINSTER	WORCESTER	MA	1453	09-743-4484	ORBIA ADVANCE CORP SAB DE CV	Paseo de la Reforma No. 483 Piso 47		Mexico City	Cuauhtemoc	6500	MX	81-099-5415	ALPHAGARY CORP	9635 INDUSTRIAL DR.		PINEVILLE	MECKLENBURG COUNTY	NC	28134	09-743-4484	TSCA7648	110000000000	325991 Custom Compounding Of Purchased Resins	Import					Import	0	216822	216822	43475	43144	44798	50,000,000 ‚Äì <100,000,000	50,000,000 ‚Äì <100,000,000	50,000,000 ‚Äì <100,000,000	50,000,000 ‚Äì <100,000,000
1,2,4-Benzenetricarboxylic acid, 1,2,4-tris(2-ethylhexyl) ester	35.6076	-89.2377	722198	3319-31-1	3319311	CASRN	TEKNOR APEX	505 Central Ave		Pawtucket	Providence	RI	2861	04-536-7968									TEKNOR APEX TENNESSEE CO (AKA HAYWOOD CO)	751 DUPREE STREET		BROWNSVILLE	HAYWOOD COUNTY	TN	38012-1708	05-487-6834	100602605	110000000000	325199 All Other Basic Organic Chemical Manufacturing	Manufacture					Manufacture	CBI	CBI	CBI	CBI	CBI	CBI	50,000,000 ‚Äì <100,000,000	50,000,000 ‚Äì <100,000,000	50,000,000 ‚Äì <100,000,000	50,000,000 ‚Äì <100,000,000
1,2,4-Benzenetricarboxylic acid, 1,2,4-tris(2-ethylhexyl) ester	35.7433	-78.8478	709436	3319-31-1	3319311	CASRN	M.A.GLOBAL RESOURCES INC	1028 BRANCH LINE LANE		APEX	wake	NC	27502	39-323-6166									M.A.GLOBAL RESOURCES INC	1028 BRANCH LINE LN		APEX	WAKE COUNTY	NC	27502	39-323-6166	TSCA122883	110069000000	424690 Other Chemical And Allied Products Merchant Wholesalers	Import					Import	0	132276	132276	143096	264000	88000	50,000,000 ‚Äì <100,000,000	50,000,000 ‚Äì <100,000,000	50,000,000 ‚Äì <100,000,000	50,000,000 ‚Äì <100,000,000
1,2,4-Benzenetricarboxylic acid, 1,2,4-tris(2-ethylhexyl) ester	38.222	-85.8298	702116	3319-31-1	3319311	CASRN	GEON Performance Solutions LLC	25777 Detroit Road, Suite 202		Westlake	Cuyahoga	OH	44145	11-724-7947	SK ECHO HOLDINGS S R L	6 rue Eugne Ruppert		Luxembourg		L 2453	LU	37-176-4800	GEON PERFORMANCE SOLUTIONS LLC	4250 BELLS LN		LOUISVILLE	JEFFERSON COUNTY	KY	40211	80-104-0098	TSCA6525	110040000000	325211 Plastics Material And Resin Manufacturing	Both					Import	0	1106600	1106600	1613200	1241700	933100	50,000,000 ‚Äì <100,000,000	50,000,000 ‚Äì <100,000,000	50,000,000 ‚Äì <100,000,000	50,000,000 ‚Äì <100,000,000
1,2,4-Benzenetricarboxylic acid, 1,2,4-tris(2-ethylhexyl) ester	39.5047	-87.3623	701104	3319-31-1	3319311	CASRN	GEON Performance Solutions LLC	25777 Detroit Road, Suite 202		Westlake	Cuyahoga	OH	44145	11-724-7947	SK ECHO HOLDINGS S R L	6 rue Eugne Ruppert		Luxembourg		L 2453	LU	37-176-4800	GEON PERFORMANCE SOLUTIONS LLC	3100 N 35TH ST		TERRE HAUTE	VIGO COUNTY	IN	47804	12-157-4909	TSCA6527	110000000000	325211 Plastics Material And Resin Manufacturing	Both					Import	0	39600	39600	0	0	0	50,000,000 ‚Äì <100,000,000	50,000,000 ‚Äì <100,000,000	50,000,000 ‚Äì <100,000,000	50,000,000 ‚Äì <100,000,000
1,2,4-Benzenetricarboxylic acid, 1,2,4-tris(2-ethylhexyl) ester	40.5252	-74.3194	717727	3319-31-1	3319311	CASRN	LANXESS CORPORATION	111 RIDC PARK WEST DRIVE		PITTSBURGH	Allegheny	PA	15275	14-585-8770	LANXESS DEUTSCHLAND GMBH	Kennedyplatz 1		Koln		50569	GM	31-546-4482	LANXESS SOLUTIONS US, INC---FORDS	1020 KING GEORGES POST ROAD		FORDS	MIDDLESEX COUNTY	NJ	08863-2329	82-864-7953	200002180	110006000000	325199 All Other Basic Organic Chemical Manufacturing	Manufacture									CBI	CBI	CBI	50,000,000 ‚Äì <100,000,000	50,000,000 ‚Äì <100,000,000	50,000,000 ‚Äì <100,000,000	50,000,000 ‚Äì <100,000,000
1,2,4-Benzenetricarboxylic acid, 1,2,4-tris(2-ethylhexyl) ester	40.7486	-73.9855	705266	3319-31-1	3319311	CASRN	ALAC International Inc	350 Fifth Avenue	Suite 3015	New York	New York	NY	10118	36-282-4687									ALAC INTERNATIONAL INC.	350 5TH AVE		NEW YORK	NEW YORK COUNTY	NY	10118	36-282-4687	TSCA10050149	110071000000	424610 Plastics Materials And Basic Forms And Shapes Merchant Wholesalers	Import					Import	0	100	100	4004123	485756	866000	50,000,000 ‚Äì <100,000,000	50,000,000 ‚Äì <100,000,000	50,000,000 ‚Äì <100,000,000	50,000,000 ‚Äì <100,000,000
1,2,4-Benzenetricarboxylic acid, 1,2,4-tris(2-ethylhexyl) ester	40.7734	-74.4261	726763	3319-31-1	3319311	CASRN	BASF Corporation	100 Park Avenue		Florham Park	NJ	MI	7932	00-130-7032	BASF SE	Carl-Bosch Strasse 38		Ludwigshafen		60756	GM	31-500-0554	BASF IMPORTS PART 1	100 PARK AVE		FLORHAM PARK	MORRIS COUNTY	NJ	7932	00-130-7032	TSCA130148	110070000000	325199 All Other Basic Organic Chemical Manufacturing	Import					Import	CBI	CBI	CBI	CBI	CBI	CBI	50,000,000 ‚Äì <100,000,000	50,000,000 ‚Äì <100,000,000	50,000,000 ‚Äì <100,000,000	50,000,000 ‚Äì <100,000,000
1,2,4-Benzenetricarboxylic acid, 1,2,4-tris(2-ethylhexyl) ester	40.8934	-74.2684	713420	3319-31-1	3319311	CASRN	Soyventis North America LLC	695 Route 46 W	Ste 406	Fairfield	Essex	NJ	7004	83-301-4959									SOYVENTIS NORTH AMERICA LLC	695 ROUTE 46 W	STE 406	FAIRFIELD	ESSEX COUNTY	NJ	7004	83-301-4959	TSCA10051418	110071000000	422690 Other Chemical And Allied Products Wholesalers	Import					Import	0	39620	39620	100160	100000	40000	50,000,000 ‚Äì <100,000,000	50,000,000 ‚Äì <100,000,000	50,000,000 ‚Äì <100,000,000	50,000,000 ‚Äì <100,000,000
1,2,4-Benzenetricarboxylic acid, 1,2,4-tris(2-ethylhexyl) ester	40.9655	-81.4686	736300	3319-31-1	3319311	CASRN	ChemSpec, Ltd.	1559 Corporate Woods Parkway	Suite 150	Uniontown	Summit County	OH	44685	13-922-0284	SAFIC ALCAN	13 Cours Valmy	92977 Paris La Dfense Cedex	Paris			FR	13-922-0284	CHEMSPEC, LTD.	1559 CORPORATE WOODS PKWY	SUITE 150	UNIONTOWN	SUMMIT COUNTY	OH	44685	13-922-0284	TSCA115201	110069000000	424690 Other Chemical And Allied Products Merchant Wholesalers	Import					Import	0	502905	502905	490695	697247	43557	50,000,000 ‚Äì <100,000,000	50,000,000 ‚Äì <100,000,000	50,000,000 ‚Äì <100,000,000	50,000,000 ‚Äì <100,000,000
1,2,4-Benzenetricarboxylic acid, 1,2,4-tris(2-ethylhexyl) ester	41.1791	-83.6691	707880	3319-31-1	3319311	CASRN	POLYONE CORPORATION	33587 WALKER ROAD		AVON LAKE	Lorain	OH	44012	84-508-2861									POLYONE CORP NORTH BALTIMORE	733 EAST WATER STREET		NORTH BALTIMORE	WOOD	OH	45872-1434	15-039-1902	100607535	110000000000	325510 Paint And Coating Manufacturing	Import					Import	0	112612	112612	600495	659601	645976	50,000,000 ‚Äì <100,000,000	50,000,000 ‚Äì <100,000,000	50,000,000 ‚Äì <100,000,000	50,000,000 ‚Äì <100,000,000
1,2,4-Benzenetricarboxylic acid, 1,2,4-tris(2-ethylhexyl) ester	41.3713	-82.138	704161	3319-31-1	3319311	CASRN	GEON Performance Solutions LLC	25777 Detroit Road, Suite 202		Westlake	Cuyahoga	OH	44145	11-724-7947	SK ECHO HOLDINGS S R L	6 rue Eugne Ruppert		Luxembourg		L 2453	LU	37-176-4800	GEON PERFORMANCE SOLUTIONS LLC	1406 LOWELL ST		ELYRIA	LORAIN COUNTY	OH	44035	96-723-1155	TSCA10057931	110071000000	424610 Plastics Materials And Basic Forms And Shapes Merchant Wholesalers	Both					Import	0	25800	25800	0	0	0	50,000,000 ‚Äì <100,000,000	50,000,000 ‚Äì <100,000,000	50,000,000 ‚Äì <100,000,000	50,000,000 ‚Äì <100,000,000
1,2,4-Benzenetricarboxylic acid, 1,2,4-tris(2-ethylhexyl) ester	41.3753	-82.1402	708684	3319-31-1	3319311	CASRN	POLYONE CORPORATION	33587 WALKER ROAD		AVON LAKE	Lorain	OH	44012	84-508-2861									Elyria Distribution Ctr.	1404 Lowell Street		Elyria		OH	44035	11-724-7947	TSCA6537	110057000000	424610 Plastics Materials And Basic Forms And Shapes Merchant Wholesalers	Import					Import	0	204360	204360	428551	384906	384899	50,000,000 ‚Äì <100,000,000	50,000,000 ‚Äì <100,000,000	50,000,000 ‚Äì <100,000,000	50,000,000 ‚Äì <100,000,000
1,2,4-Benzenetricarboxylic acid, 1,2,4-tris(2-ethylhexyl) ester	41.494	-71.3762	726323	3319-31-1	3319311	CASRN	The Chemical Company	44 Southwest Avenue		Jamestown	Newport	RI	2835	15-362-2584									THE CHEMICAL COMPANY	44 SOUTHWEST AVE	PO BOX 436	JAMESTOWN	NEWPORT COUNTY	RI	2835	15-362-2584	TSCA108221	110068000000	424690 Other Chemical And Allied Products Merchant Wholesalers	Import					Import	CBI	CBI	CBI	CBI	CBI	CBI	50,000,000 ‚Äì <100,000,000	50,000,000 ‚Äì <100,000,000	50,000,000 ‚Äì <100,000,000	50,000,000 ‚Äì <100,000,000
1,2,4-Benzenetricarboxylic acid, 1,2,4-tris(2-ethylhexyl) ester	42.5329	-71.7081	739080	3319-31-1	3319311	CASRN	MEXICHEM SPECIALTY COMPOUNDS INC dba ALPHAGARY CORP	170 PIONEER DR		LEOMINSTER	WORCESTER	MA	1453	09-743-4484	ORBIA ADVANCE CORP SAB DE CV	Paseo de la Reforma No. 483 Piso 47		Mexico City	Cuauhtemoc	6500	MX	81-099-5415	ALPHAGARY CORP	170 PIONEER DRIVE		LEOMINSTER	WORCESTER	MA	01453-3474	09-743-4484	TSCA7647	110000000000	325991 Custom Compounding Of Purchased Resins	Import					Import	0	1966014	1966014	5633517	6302167	5337545	50,000,000 ‚Äì <100,000,000	50,000,000 ‚Äì <100,000,000	50,000,000 ‚Äì <100,000,000	50,000,000 ‚Äì <100,000,000
1,2,4-Benzenetricarboxylic acid, decyl octyl ester	29.7375	-95.4606	702706	67989-23-5	67989235	CASRN	WESTLAKE CHEMICAL CORPORATION	2801 POST OAK BOULEVARD, SUITE 600		HOUSTON	HARRIS COUNTY	TX	77056	78-391-8485									WESTLAKE COMPOUNDS MEXICO S. DE R.L. DE C.V.	2801 POST OAK BLVD	SUITE 600	HOUSTON	HARRIS COUNTY	TX	77056	81-459-0600	TSCA10058151	110071000000	325991 Custom Compounding Of Purchased Resins	Import					Import	CBI	CBI	CBI	CBI	CBI	CBI	10,000,000 ‚Äì <50,000,000	1,000,000 ‚Äì <10,000,000	1,000,000 ‚Äì <10,000,000	1,000,000 ‚Äì <10,000,000
1,2,4-Benzenetricarboxylic acid, decyl octyl ester	29.7556	-95.3627	713643	67989-23-5	67989235	CASRN	Mitsubishi Corporation (Americas)	655 Third Avenue		New York	New York	NY	10017	07-834-6382									MITSUBISHI INTERNATIONAL POLYMERTRADE CORPORATION	1221 MCKINNEY ST	SUITE 3500	HOUSTON	HARRIS COUNTY	TX	77010	80-701-9070	TSCA123001	110070000000	424690 Other Chemical And Allied Products Merchant Wholesalers						Import	0	220460	220460	264552	341713	132276	10,000,000 ‚Äì <50,000,000	1,000,000 ‚Äì <10,000,000	1,000,000 ‚Äì <10,000,000	1,000,000 ‚Äì <10,000,000
1,2,4-Benzenetricarboxylic acid, decyl octyl ester	35.1022	-80.8867	739841	67989-23-5	67989235	CASRN	MEXICHEM SPECIALTY COMPOUNDS INC dba ALPHAGARY CORP	170 PIONEER DR		LEOMINSTER	WORCESTER	MA	1453	09-743-4484	ORBIA ADVANCE CORP SAB DE CV	Paseo de la Reforma No. 483 Piso 47		Mexico City	Cuauhtemoc	6500	MX	81-099-5415	ALPHAGARY CORP	9635 INDUSTRIAL DR.		PINEVILLE	MECKLENBURG COUNTY	NC	28134	09-743-4484	TSCA7648	110000000000	325991 Custom Compounding Of Purchased Resins	Import					Import	0	257938	257938	0	43298	0	10,000,000 ‚Äì <50,000,000	1,000,000 ‚Äì <10,000,000	1,000,000 ‚Äì <10,000,000	1,000,000 ‚Äì <10,000,000
1,2,4-Benzenetricarboxylic acid, decyl octyl ester	35.6076	-89.2377	722207	67989-23-5	67989235	CASRN	TEKNOR APEX	505 Central Ave		Pawtucket	Providence	RI	2861	04-536-7968									TEKNOR APEX TENNESSEE CO (AKA HAYWOOD CO)	751 DUPREE STREET		BROWNSVILLE	HAYWOOD COUNTY	TN	38012-1708	05-487-6834	100602605	110000000000	325199 All Other Basic Organic Chemical Manufacturing	Manufacture					Manufacture	CBI	CBI	CBI	CBI	CBI	CBI	10,000,000 ‚Äì <50,000,000	1,000,000 ‚Äì <10,000,000	1,000,000 ‚Äì <10,000,000	1,000,000 ‚Äì <10,000,000
1,2,4-Benzenetricarboxylic acid, decyl octyl ester	35.9233	-80.0297	713807	67989-23-5	67989235	CASRN	Kao America Inc.	2535 Spring Grove Ave		Cincinnati	Hamilton	OH	45214-1729	07-860-6544	KAO CORP	1-14-10 Nihombashi Kayabacho		Chuo-ku		103-0025	JA	69-053-5703	KAO SPECIALTIES AMERICAS LLC	243 WOODBINE STREET		HIGH POINT	GUILFORD	NC	27260-8339	12-511-8872	TSCA4947	110001000000	325613 Surface Active Agent Manufacturing	Manufacture					Manufacture	CBI	CBI	CBI	CBI	CBI	CBI	10,000,000 ‚Äì <50,000,000	1,000,000 ‚Äì <10,000,000	1,000,000 ‚Äì <10,000,000	1,000,000 ‚Äì <10,000,000
1,2,4-Benzenetricarboxylic acid, decyl octyl ester	40.5252	-74.3194	717734	67989-23-5	67989235	CASRN	LANXESS CORPORATION	111 RIDC PARK WEST DRIVE		PITTSBURGH	Allegheny	PA	15275	14-585-8770	LANXESS DEUTSCHLAND GMBH	Kennedyplatz 1		Koln		50569	GM	31-546-4482	LANXESS SOLUTIONS US, INC---FORDS	1020 KING GEORGES POST ROAD		FORDS	MIDDLESEX COUNTY	NJ	08863-2329	82-864-7953	200002180	110006000000	325199 All Other Basic Organic Chemical Manufacturing	Manufacture									CBI	CBI	CBI	10,000,000 ‚Äì <50,000,000	1,000,000 ‚Äì <10,000,000	1,000,000 ‚Äì <10,000,000	1,000,000 ‚Äì <10,000,000
1,2,4-Benzenetricarboxylic acid, decyl octyl ester	40.9647	-74.2239	716021	67989-23-5	67989235	CASRN	BP America, Inc.	501 Westlake Park Blvd		Houston	Harris	TX	77079	92-844-2227	BP P L C	1 St. James's Square		LONDON		SW1Y 4PD	UK	21-004-2669	BP LUBRICANTS USA INC	1500 VALLEY RD.		WAYNE	PASSAIC COUNTY	NJ	7470	06-133-8489	TSCA5419	110007000000	324191 Petroleum Lubricating Oil And Grease Manufacturing	Withheld					CBI	CBI	CBI	CBI	CBI	CBI	CBI	10,000,000 ‚Äì <50,000,000	1,000,000 ‚Äì <10,000,000	1,000,000 ‚Äì <10,000,000	1,000,000 ‚Äì <10,000,000
1,2,4-Benzenetricarboxylic acid, decyl octyl ester	41.3753	-82.1402	708692	67989-23-5	67989235	CASRN	POLYONE CORPORATION	33587 WALKER ROAD		AVON LAKE	Lorain	OH	44012	84-508-2861									Elyria Distribution Ctr.	1404 Lowell Street		Elyria		OH	44035	11-724-7947	TSCA6537	110057000000	424610 Plastics Materials And Basic Forms And Shapes Merchant Wholesalers	Import					Import	0	55495	55495	43604	29730	45585	10,000,000 ‚Äì <50,000,000	1,000,000 ‚Äì <10,000,000	1,000,000 ‚Äì <10,000,000	1,000,000 ‚Äì <10,000,000
1,2,4-Benzenetricarboxylic acid, decyl octyl ester	42.5329	-71.7081	739085	67989-23-5	67989235	CASRN	MEXICHEM SPECIALTY COMPOUNDS INC dba ALPHAGARY CORP	170 PIONEER DR		LEOMINSTER	WORCESTER	MA	1453	09-743-4484	ORBIA ADVANCE CORP SAB DE CV	Paseo de la Reforma No. 483 Piso 47		Mexico City	Cuauhtemoc	6500	MX	81-099-5415	ALPHAGARY CORP	170 PIONEER DRIVE		LEOMINSTER	WORCESTER	MA	01453-3474	09-743-4484	TSCA7647	110000000000	325991 Custom Compounding Of Purchased Resins	Import					Import	0	2051106	2051106	1252490	1011496	86707	10,000,000 ‚Äì <50,000,000	1,000,000 ‚Äì <10,000,000	1,000,000 ‚Äì <10,000,000	1,000,000 ‚Äì <10,000,000
1,2,4-Benzenetricarboxylic acid, mixed branched and linear heptyl and nonyl and undecyl esters	42.5329	-71.7081	739088	68515-58-2	68515582	CASRN	MEXICHEM SPECIALTY COMPOUNDS INC dba ALPHAGARY CORP	170 PIONEER DR		LEOMINSTER	WORCESTER	MA	1453	09-743-4484	ORBIA ADVANCE CORP SAB DE CV	Paseo de la Reforma No. 483 Piso 47		Mexico City	Cuauhtemoc	6500	MX	81-099-5415	ALPHAGARY CORP	170 PIONEER DRIVE		LEOMINSTER	WORCESTER	MA	01453-3474	09-743-4484	TSCA7647	110000000000	325991 Custom Compounding Of Purchased Resins	Import						0	0	0	0	0	3449242	0	0	0	3449242
1,2,4-Benzenetricarboxylic acid, mixed branched tridecyl and isodecyl esters	35.6076	-89.2377	722213	70225-05-7	70225057	CASRN	TEKNOR APEX	505 Central Ave		Pawtucket	Providence	RI	2861	04-536-7968									TEKNOR APEX TENNESSEE CO (AKA HAYWOOD CO)	751 DUPREE STREET		BROWNSVILLE	HAYWOOD COUNTY	TN	38012-1708	05-487-6834	100602605	110000000000	325199 All Other Basic Organic Chemical Manufacturing	Manufacture					Manufacture	CBI	CBI	CBI	CBI	CBI	CBI	<1,000,000	<1,000,000	1,000,000 ‚Äì <20,000,000	1,000,000 ‚Äì <20,000,000
1,2,4-Benzenetricarboxylic acid, mixed branched tridecyl and isodecyl esters	40.5252	-74.3194	717745	70225-05-7	70225057	CASRN	LANXESS CORPORATION	111 RIDC PARK WEST DRIVE		PITTSBURGH	Allegheny	PA	15275	14-585-8770	LANXESS DEUTSCHLAND GMBH	Kennedyplatz 1		Koln		50569	GM	31-546-4482	LANXESS SOLUTIONS US, INC---FORDS	1020 KING GEORGES POST ROAD		FORDS	MIDDLESEX COUNTY	NJ	08863-2329	82-864-7953	200002180	110006000000	325199 All Other Basic Organic Chemical Manufacturing	Manufacture					Manufacture	CBI	0	CBI	CBI	CBI	CBI	<1,000,000	<1,000,000	1,000,000 ‚Äì <20,000,000	1,000,000 ‚Äì <20,000,000
1,2,4-Benzenetricarboxylic acid, mixed decyl and hexyl and octyl esters	40.7734	-74.4261	726950	68130-50-7	68130507	CASRN	BASF Corporation	100 Park Avenue		Florham Park	NJ	MI	7932	00-130-7032	BASF SE	Carl-Bosch Strasse 38		Ludwigshafen		60756	GM	31-500-0554	BASF IMPORTS PART 1	100 PARK AVE		FLORHAM PARK	MORRIS COUNTY	NJ	7932	00-130-7032	TSCA130148	110070000000	325199 All Other Basic Organic Chemical Manufacturing	Import					Import	CBI	CBI	CBI	CBI	CBI	CBI	1,000,000 ‚Äì <20,000,000	1,000,000 ‚Äì <20,000,000	1,000,000 ‚Äì <20,000,000	1,000,000 ‚Äì <20,000,000
1,2,4-Benzenetricarboxylic acid, mixed lauryl and octyl triesters	29.7885	-95.6002	736415	1163775-81-2	1163775812	CASRN	Sasol Chemicals (USA) LLC	12120 Wickchester Lane		Houston	Harris	TX	77079-2990	10-266-6872	SASOL LTD	Sasol PL	50 Katherine ST	Sandton		2196	SF	53-858-0692	SASOL CHEMICALS (USA) LLC	12120 WICKCHESTER LANE		HOUSTON	HARRIS	TX	77079	10-266-6872	TSCA83121	110065000000	325110 Petrochemical Manufacturing	Import	325199 All Other Basic Organic Chemical Manufacturing	Import	325180 Other Basic Inorganic Chemical Manufacturing	Import	Import	0	339291	339291	188495	113097	150796	339291	188495	120465	533119
1,2,4-Benzenetricarboxylic acid, mixed lauryl and octyl triesters	42.9178	-71.4312	712290	1163775-81-2	1163775812	CASRN	KLUBER LUBRICATION NORTH AMERICA L.P.	32 INDUSTRIAL DR.		LONDONDERRY	Rockingham	NH	3053	31-557-2255									KLUBER LUBRICATION NA LP	32 INDUSTRIAL DRIVE		LONDONDERRY	ROCKINGHAM COUNTY	NH	03053-2008	10-572-6533	100606720	110002000000	324191 Petroleum Lubricating Oil And Grease Manufacturing	Both						0	0	0	0	7368	382323	339291	188495	120465	533119
1,2,4-Benzenetricarboxylic acid, tri-C7-9-branched and linear alkyl esters	35.6076	-89.2377	722212	68515-60-6	68515606	CASRN	TEKNOR APEX	505 Central Ave		Pawtucket	Providence	RI	2861	04-536-7968									TEKNOR APEX TENNESSEE CO (AKA HAYWOOD CO)	751 DUPREE STREET		BROWNSVILLE	HAYWOOD COUNTY	TN	38012-1708	05-487-6834	100602605	110000000000	325199 All Other Basic Organic Chemical Manufacturing	Manufacture					Manufacture	CBI	CBI	CBI	CBI	CBI	CBI	<1,000,000	<1,000,000	<1,000,000	<1,000,000
1,2,4-Benzenetricarboxylic acid, tri-C9-11-alkyl esters	42.5329	-71.7081	739091	94279-36-4	94279364	CASRN	MEXICHEM SPECIALTY COMPOUNDS INC dba ALPHAGARY CORP	170 PIONEER DR		LEOMINSTER	WORCESTER	MA	1453	09-743-4484	ORBIA ADVANCE CORP SAB DE CV	Paseo de la Reforma No. 483 Piso 47		Mexico City	Cuauhtemoc	6500	MX	81-099-5415	ALPHAGARY CORP	170 PIONEER DRIVE		LEOMINSTER	WORCESTER	MA	01453-3474	09-743-4484	TSCA7647	110000000000	325991 Custom Compounding Of Purchased Resins	Import					Import	0	1303384	1303384	82562	0	0	1303384	82562	9610	25174
1,2,4-Benzenetricarboxylic acid, tri-C9-11-alkyl esters	42.9178	-71.4312	712314	94279-36-4	94279364	CASRN	KLUBER LUBRICATION NORTH AMERICA L.P.	32 INDUSTRIAL DR.		LONDONDERRY	Rockingham	NH	3053	31-557-2255									KLUBER LUBRICATION NA LP	32 INDUSTRIAL DRIVE		LONDONDERRY	ROCKINGHAM COUNTY	NH	03053-2008	10-572-6533	100606720	110002000000	324191 Petroleum Lubricating Oil And Grease Manufacturing	Both						0	0	0	0	9610	25174	1303384	82562	9610	25174
1,2,4-Butanetricarboxylic acid, 2-phosphono-	29.9667	-95.3649	715771	37971-36-1	37971361	CASRN	Baker Hughes Company	17021 Aldine Westfield Rd.		Houston	Harris	TX	77073	08-076-4113									BAKER HUGHES COMPANY - ALDINE WESTFIELD	17021 ALDINE WESTFIELD RD		HOUSTON	HARRIS COUNTY	TX	77073	08-076-4113	TSCA10069859	110071000000	325998 All Other Miscellaneous Chemical Product And Preparation Manufacturing	Withheld					CBI	CBI	CBI	CBI	CBI	CBI	CBI	1,000,000 ‚Äì <10,000,000	10,000,000 ‚Äì <50,000,000	1,000,000 ‚Äì <10,000,000	1,000,000 ‚Äì <10,000,000
1,2,4-Butanetricarboxylic acid, 2-phosphono-	30.7089	-95.5269	708913	37971-36-1	37971361	CASRN	Italmatch USA Corporation	5544 OAKDALE ROAD SE		Smyrna	GA	GA	30082	07-909-7066	ITALMATCH CHEMICALS SPA	VIA MAGAZZINI DEL COTONE 17		GENOVA		16128	IT	56-513-2532	COMPASS CHEMICAL INTERNATIONAL	ON HIGHWAY 19 AT BEARKAT BLVD		HUNTSVILLE	WALKER COUNTY	TX	77342	12-549-8969	TSCA7386	110034000000	325180 Other Basic Inorganic Chemical Manufacturing	Both	325199 All Other Basic Organic Chemical Manufacturing	Both				0	0	0	0	0	843260	1,000,000 ‚Äì <10,000,000	10,000,000 ‚Äì <50,000,000	1,000,000 ‚Äì <10,000,000	1,000,000 ‚Äì <10,000,000
1,2,4-Butanetricarboxylic acid, 2-phosphono-	32.6158	-96.7439	711230	37971-36-1	37971361	CASRN	BRENNTAG SOUTHWEST, INC., LANC	704 E. WINTERGREEN RD.		LANCASTER	Dallas	TX	75134	07-842-7532	BRENNTAG AG	Messeallee 11		Essen		45131	GM	50-709-1739	BRENNTAG SOUTHWEST INC LANC ASTER	704 E WINTERGREEN RD		LANCASTER	DALLAS	TX	75134	07-842-7532	TSCA10036072	110021000000	424690 Other Chemical And Allied Products Merchant Wholesalers										20700	62000	20700	1,000,000 ‚Äì <10,000,000	10,000,000 ‚Äì <50,000,000	1,000,000 ‚Äì <10,000,000	1,000,000 ‚Äì <10,000,000
1,2,4-Butanetricarboxylic acid, 2-phosphono-	33.0458	-117.284	719825	37971-36-1	37971361	CASRN	Valudor Products, LLC	179 Calle Magdelena	Suite 100	Encinitas	San Diego	CA	92024	06-877-7257									VALUDOR PRODUCTS	179 CALLE MAGDALENA	SUITE 100	ENCINITAS	SAN DIEGO COUNTY	CA	92024	06-877-7257	TSCA10099039	110071000000	424690 Other Chemical And Allied Products Merchant Wholesalers	Import	424910 Farm Supplies Merchant Wholesalers	Import			Import	CBI	CBI	CBI	CBI	CBI	CBI	1,000,000 ‚Äì <10,000,000	10,000,000 ‚Äì <50,000,000	1,000,000 ‚Äì <10,000,000	1,000,000 ‚Äì <10,000,000
1,2,4-Butanetricarboxylic acid, 2-phosphono-	33.0923	-83.278	701204	37971-36-1	37971361	CASRN	ZSCHIMMER&SCHWARZ	70 GA HWY 22 W		MILLEDGEVILLE	BALDWIN	GA	31059	07-205-7511									ZSCHIMMER & SCHWARZ INC	70 GA HWY 22 W		MILLEDGEVILLE	BALDWIN	GA	31061-6606	07-205-7511	100608699	110021000000	325613 Surface Active Agent Manufacturing	Manufacture					Import	0	240625	240625	277750	283250	185625	1,000,000 ‚Äì <10,000,000	10,000,000 ‚Äì <50,000,000	1,000,000 ‚Äì <10,000,000	1,000,000 ‚Äì <10,000,000
1,2,4-Butanetricarboxylic acid, 2-phosphono-	33.8193	-84.5005	712697	37971-36-1	37971361	CASRN	Italmatch USA Corporation	5544 Oakdale Road SE		Smyrna	Cobb	GA	30082	07-909-7066	ITALMATCH CHEMICALS SPA	VIA MAGAZZINI DEL COTONE 17		GENOVA		16128	IT	56-513-2532	ITALMATCH USA CORPORATION	5544 OAKDALE ROAD SE		SMYRNA	COBB COUNTY	GA	30082	07-909-7066	TSCA10068759	110071000000	325180 Other Basic Inorganic Chemical Manufacturing	Import	325199 All Other Basic Organic Chemical Manufacturing	Import			Import	0	947704	947704	3282087	4084001	166157	1,000,000 ‚Äì <10,000,000	10,000,000 ‚Äì <50,000,000	1,000,000 ‚Äì <10,000,000	1,000,000 ‚Äì <10,000,000
1,2,4-Butanetricarboxylic acid, 2-phosphono-	33.8406	-84.2403	717340	37971-36-1	37971361	CASRN	Italmatch USA Corporation	5544 Oakdale Road SE		Smyrna	Cobb	GA	30082	07-909-7066	ITALMATCH CHEMICALS GROUP	Via Magazzini del Cotone 17		Genova		16128	IT	56-513-2532	BWA WATER ADDITIVES US LLC	1979 LAKESIDE PARKWAY, SUITE 925		TUCKER	DEKALB	GA	30084-5870	79-632-2100	100604995	110036000000	424690 Other Chemical And Allied Products Merchant Wholesalers	Both					Import	0	186312	186312	390442	203030	216720	1,000,000 ‚Äì <10,000,000	10,000,000 ‚Äì <50,000,000	1,000,000 ‚Äì <10,000,000	1,000,000 ‚Äì <10,000,000
1,2,4-Butanetricarboxylic acid, 2-phosphono-	40.4575	-80.1933	707094	37971-36-1	37971361	CASRN	LANXESS CORPORATION	111 RIDC PARK WEST DRIVE		PITTSBURGH	Allegheny	PA	15275	14-585-8770	LANXESS DEUTSCHLAND GMBH	Kennedyplatz 1		Koln		50569	GM	31-546-4482	LANXESS CORPORATION---PITTSBURGH	111 RIDC PARK WEST DR		PITTSBURGH	ALLEGHENY COUNTY	PA	15275-1112	14-585-8770	100606790	110024000000	325130 Synthetic Dye And Pigment Manufacturing	Import	325199 All Other Basic Organic Chemical Manufacturing	Import			Import	0	5048935	5048935	5403479	3558988	3642809	1,000,000 ‚Äì <10,000,000	10,000,000 ‚Äì <50,000,000	1,000,000 ‚Äì <10,000,000	1,000,000 ‚Äì <10,000,000
1,2,4-Butanetricarboxylic acid, 2-phosphono-	41.7717	-87.7758	725592	37971-36-1	37971361	CASRN	NALCO- AN ECOLAB COMPANY	1601 WEST DIEHL RD		NAPERVILLE	Dupage	IL	60563	00-496-2403									NALCO (CLEARING 0101)	6216 W 66TH PL		CHICAGO	COOK COUNTY	IL	60638	04-337-0790	TSCA99458	110067000000	325998 All Other Miscellaneous Chemical Product And Preparation Manufacturing	Both					Manufacture	113833	0	113833	112757	106660	23053	1,000,000 ‚Äì <10,000,000	10,000,000 ‚Äì <50,000,000	1,000,000 ‚Äì <10,000,000	1,000,000 ‚Äì <10,000,000
1,2,4-Butanetricarboxylic acid, 2-phosphono-	43.0975	-88.0606	722071	37971-36-1	37971361	CASRN	BRENNTAG GREAT LAKES, LLC	P.O. BOX 444		BUTLER	Milwaukee	WI	53007	04-245-4228	BRENNTAG AG	Messeallee 11		Essen		45131	GM	50-709-1739	BRENNTAG GREAT LAKES, LLC - WAUWATOSA WAREHOUSE	4420 N HARLEY DAVIDSON AVE		WAUWATOSA	MILWAUKEE COUNTY	WI	53226	04-245-4228	100601681	110019000000	424690 Other Chemical And Allied Products Merchant Wholesalers	Import					Import	0	49052	49052	39684	28935	30866	1,000,000 ‚Äì <10,000,000	10,000,000 ‚Äì <50,000,000	1,000,000 ‚Äì <10,000,000	1,000,000 ‚Äì <10,000,000
1,2,4-Butanetricarboxylic acid, 2-phosphono-, sodium salt (1:?)	29.59	-95.4047	718019	40372-66-5	40372665	CASRN	Baker Hughes Company	17021 Aldine Westfield Rd.		Houston	Harris	TX	77073	08-076-4113									SYNTECH CHEMICALS INC	14822 HOOPER RD.		HOUSTON	HARRIS	TX	77047	16-179-7402	TSCA5966	110000000000	325998 All Other Miscellaneous Chemical Product And Preparation Manufacturing	Both					Manufacture	CBI	CBI	CBI	CBI	CBI	CBI	1,000,000 ‚Äì <10,000,000	1,000,000 ‚Äì <10,000,000	1,000,000 ‚Äì <10,000,000	1,000,000 ‚Äì <10,000,000
1,2,4-Butanetricarboxylic acid, 2-phosphono-, sodium salt (1:?)	29.6477	-95.0638	714392	40372-66-5	40372665	CASRN	Baker Hughes Company	17021 Aldine Westfield Rd.		Houston	Harris	TX	77073	08-076-4113									BAKER PETROLITE BAYPORT FACILI TY	13200 BAY PARK ROAD		PASADENA	HARRIS	TX	77507-1108	08-836-1233	TSCA5944	110000000000	325998 All Other Miscellaneous Chemical Product And Preparation Manufacturing	Manufacture					Manufacture	CBI	CBI	CBI	CBI	CBI	CBI	1,000,000 ‚Äì <10,000,000	1,000,000 ‚Äì <10,000,000	1,000,000 ‚Äì <10,000,000	1,000,000 ‚Äì <10,000,000
1,2,4-Butanetricarboxylic acid, 2-phosphono-, sodium salt (1:?)	30.0502	-90.632	723884	40372-66-5	40372665	CASRN	NALCO- AN ECOLAB COMPANY	1601 WEST DIEHL RD		NAPERVILLE	DuPage	IL	60563	00-496-2403									NALCO COMPANY (GARYVILLE 0109)	3628 HIGHWAY 44		GARYVILLE	ST. JOHN THE BAPTIST PARISH	LA	70051	01-143-5430	TSCA5879	110007000000	325110 Petrochemical Manufacturing	Both					Both	9436	1253	10689	7097	7260	62126	1,000,000 ‚Äì <10,000,000	1,000,000 ‚Äì <10,000,000	1,000,000 ‚Äì <10,000,000	1,000,000 ‚Äì <10,000,000
1,2,4-Butanetricarboxylic acid, 2-phosphono-, sodium salt (1:?)	32.8909	-96.6686	715611	40372-66-5	40372665	CASRN	Ecolab Inc	1 Ecolab Place		St. Paul	Ramsey	MN	55102	00-615-4611									ECOLAB INC	2305 SHERWIN ST.		GARLAND	DALLAS COUNTY	TX	75041	05-533-1250	100605682	110000000000	325611 Soap And Other Detergent Manufacturing	Manufacture					Manufacture	133813	0	133813	176980	152115	60807	1,000,000 ‚Äì <10,000,000	1,000,000 ‚Äì <10,000,000	1,000,000 ‚Äì <10,000,000	1,000,000 ‚Äì <10,000,000
1,2,4-Butanetricarboxylic acid, 2-phosphono-, sodium salt (1:?)	32.9806	-96.851	713592	40372-66-5	40372665	CASRN	Ecolab Inc	1 Ecolab Place		St. Paul	Ramsey	MN	55102	00-615-4611									CENTURY PRODUCTS INC	2901 BELMEADE DRIVE		CARROLLTON	DALLAS COUNTY	TX	75006-2315	00-323-7021	100605156	110000000000	325611 Soap And Other Detergent Manufacturing	Manufacture					Manufacture	33860	0	33860	58216	41466	50012	1,000,000 ‚Äì <10,000,000	1,000,000 ‚Äì <10,000,000	1,000,000 ‚Äì <10,000,000	1,000,000 ‚Äì <10,000,000
1,2,4-Butanetricarboxylic acid, 2-phosphono-, sodium salt (1:?)	33.0923	-83.278	701205	40372-66-5	40372665	CASRN	ZSCHIMMER&SCHWARZ	70 GA HWY 22 W		MILLEDGEVILLE	BALDWIN	GA	31059	07-205-7511									ZSCHIMMER & SCHWARZ INC	70 GA HWY 22 W		MILLEDGEVILLE	BALDWIN	GA	31061-6606	07-205-7511	100608699	110021000000	325613 Surface Active Agent Manufacturing	Manufacture					Manufacture	315691	0	315691	214366	254653	215287	1,000,000 ‚Äì <10,000,000	1,000,000 ‚Äì <10,000,000	1,000,000 ‚Äì <10,000,000	1,000,000 ‚Äì <10,000,000
1,2,4-Butanetricarboxylic acid, 2-phosphono-, sodium salt (1:?)	33.4251	-84.1499	716137	40372-66-5	40372665	CASRN	Ecolab Inc	1 Ecolab Place		St. Paul	Ramsey	MN	55102	00-615-4611									ECOLAB INC	261 HWY. 155 S.		MCDONOUGH	HENRY COUNTY	GA	30253-6635	06-142-3778	100605678	110001000000	325611 Soap And Other Detergent Manufacturing	Both					Manufacture	164339	0	164339	225234	205728	92069	1,000,000 ‚Äì <10,000,000	1,000,000 ‚Äì <10,000,000	1,000,000 ‚Äì <10,000,000	1,000,000 ‚Äì <10,000,000
1,2,4-Butanetricarboxylic acid, 2-phosphono-, sodium salt (1:?)	33.8392	-118.23	722542	40372-66-5	40372665	CASRN	NALCO- AN ECOLAB COMPANY	1601 WEST DIEHL RD		NAPERVILLE	DuPage	IL	60563	00-496-2403									NALCO COMPANY (CARSON 0111)	2111 E. DOMINQUEZ ST.		CARSON	LOS ANGELES COUNTY	CA	90801	10-438-9205	TSCA5880	110000000000	325199 All Other Basic Organic Chemical Manufacturing	Both					Manufacture	845	0	845	1643	2696	37627	1,000,000 ‚Äì <10,000,000	1,000,000 ‚Äì <10,000,000	1,000,000 ‚Äì <10,000,000	1,000,000 ‚Äì <10,000,000
1,2,4-Butanetricarboxylic acid, 2-phosphono-, sodium salt (1:?)	33.9971	-117.903	716370	40372-66-5	40372665	CASRN	Ecolab Inc	1 Ecolab Place		St. Paul	Ramsey	MN	55102	00-615-4611									ECOLAB INC.	18383 E. RAILROAD ST.		CITY OF INDUSTRY	LOS ANGELES COUNTY	CA	91748-1218	03-084-1597	100605683	110022000000	325611 Soap And Other Detergent Manufacturing	Manufacture					Manufacture	264934	0	264934	273789	256676	101669	1,000,000 ‚Äì <10,000,000	1,000,000 ‚Äì <10,000,000	1,000,000 ‚Äì <10,000,000	1,000,000 ‚Äì <10,000,000
1,2,4-Butanetricarboxylic acid, 2-phosphono-, sodium salt (1:?)	39.4153	-77.9001	717282	40372-66-5	40372665	CASRN	Ecolab Inc	1 Ecolab Place		St. Paul	Ramsey	MN	55102	00-615-4611									ECOLAB INC	942 BAKER ROAD		MARTINSBURG	BERKELEY COUNTY	WV	25405-9436	00-821-9912	100605680	110006000000	325611 Soap And Other Detergent Manufacturing	Manufacture					Manufacture	281967	0	281967	288010	257635	109123	1,000,000 ‚Äì <10,000,000	1,000,000 ‚Äì <10,000,000	1,000,000 ‚Äì <10,000,000	1,000,000 ‚Äì <10,000,000
1,2,4-Butanetricarboxylic acid, 2-phosphono-, sodium salt (1:?)	40.4575	-80.1933	707097	40372-66-5	40372665	CASRN	LANXESS CORPORATION	111 RIDC PARK WEST DRIVE		PITTSBURGH	Allegheny	PA	15275	14-585-8770	LANXESS DEUTSCHLAND GMBH	Kennedyplatz 1		Koln		50569	GM	31-546-4482	LANXESS CORPORATION---PITTSBURGH	111 RIDC PARK WEST DR		PITTSBURGH	ALLEGHENY COUNTY	PA	15275-1112	14-585-8770	100606790	110024000000	325130 Synthetic Dye And Pigment Manufacturing	Import	325199 All Other Basic Organic Chemical Manufacturing	Import			Import	0	167551	167551	231485	326405	176722	1,000,000 ‚Äì <10,000,000	1,000,000 ‚Äì <10,000,000	1,000,000 ‚Äì <10,000,000	1,000,000 ‚Äì <10,000,000
1,2,4-Butanetricarboxylic acid, 2-phosphono-, sodium salt (1:?)	40.6957	-75.2018	718818	40372-66-5	40372665	CASRN	Baker Hughes Company	17021 Aldine Westfield Rd.		Houston	Harris	TX	77073	08-076-4113									GULBRANDSEN	1 RIVERSIDE WAY		PHILLIPSBURG		NJ	8865	10-251-1594	TSCA5960	110002000000	325998 All Other Miscellaneous Chemical Product And Preparation Manufacturing	Manufacture					Manufacture	CBI	CBI	CBI	CBI	CBI	CBI	1,000,000 ‚Äì <10,000,000	1,000,000 ‚Äì <10,000,000	1,000,000 ‚Äì <10,000,000	1,000,000 ‚Äì <10,000,000
1,2,4-Butanetricarboxylic acid, 2-phosphono-, sodium salt (1:?)	40.8504	-80.274	725609	40372-66-5	40372665	CASRN	NALCO- AN ECOLAB COMPANY	1601 WEST DIEHL RD		NAPERVILLE	DuPage	IL	60563	00-496-2403									NALCO COMPANY	125 NALCO WAY		ELLWOOD CITY	BEAVER	PA	16117	10-438-9205	TSCA5883	110056000000	325998 All Other Miscellaneous Chemical Product And Preparation Manufacturing	Both					Both	88029	2	88031	100614	111319	143795	1,000,000 ‚Äì <10,000,000	1,000,000 ‚Äì <10,000,000	1,000,000 ‚Äì <10,000,000	1,000,000 ‚Äì <10,000,000
1,2,4-Butanetricarboxylic acid, 2-phosphono-, sodium salt (1:?)	41.4885	-88.1495	729181	40372-66-5	40372665	CASRN	Ecolab Inc	1 Ecolab Place		St. Paul	Ramsey	MN	55102	00-615-4611									ECOLAB INC	3001 CHANNAHON RD.		JOLIET	WILL COUNTY	IL	60436-9581	06-438-5701	100605681	110000000000	325611 Soap And Other Detergent Manufacturing	Both					Manufacture	462103	0	462103	373574	500463	233068	1,000,000 ‚Äì <10,000,000	1,000,000 ‚Äì <10,000,000	1,000,000 ‚Äì <10,000,000	1,000,000 ‚Äì <10,000,000
1,2,4-Butanetricarboxylic acid, 2-phosphono-, sodium salt (1:?)	41.7717	-87.7758	725593	40372-66-5	40372665	CASRN	NALCO- AN ECOLAB COMPANY	1601 WEST DIEHL RD		NAPERVILLE	Dupage	IL	60563	00-496-2403									NALCO (CLEARING 0101)	6216 W 66TH PL		CHICAGO	COOK COUNTY	IL	60638	04-337-0790	TSCA99458	110067000000	325998 All Other Miscellaneous Chemical Product And Preparation Manufacturing	Both					Manufacture	75766	0	75766	67533	24298	49975	1,000,000 ‚Äì <10,000,000	1,000,000 ‚Äì <10,000,000	1,000,000 ‚Äì <10,000,000	1,000,000 ‚Äì <10,000,000
1,2,4-Triazin-5(2H)-one, 4-amino-6-(1,1-dimethylethyl)-3,4-dihydro-3-thioxo-	38.6707	-90.3986	734838	33509-43-2	33509432	CASRN	Bayer US Holding LP	100 Bayer Blvd		Whippany	Morris	NJ	7981	11-779-8237	BAYER AG	Kaiser-Wilhelm-Allee 1		Leverkusen		51373	GM	31-503-4629	BAYER CROPSCIENCE LP	800 N LINDBERGH BLVD		SAINT LOUIS	ST. LOUIS COUNTY	MO	63141	11-703-1168	TSCA10056924	110071000000	325320 Pesticide And Other Agricultural Chemical Manufacturing	Import	541710 Research And Development In The Physical, Engineering, And Life Sciences	Import			Import	CBI	CBI	CBI	CBI	CBI	CBI	1,000,000 ‚Äì <20,000,000	1,000,000 ‚Äì <20,000,000	1,000,000 ‚Äì <20,000,000	1,000,000 ‚Äì <20,000,000
1,2,4-Triazin-5(2H)-one, 4-amino-6-(1,1-dimethylethyl)-3,4-dihydro-3-thioxo-	39.122	-94.4755	730558	33509-43-2	33509432	CASRN	Bayer US Holding LP	100 Bayer Blvd		Whippany	Morris	NJ	7981	11-779-8237	BAYER AG	Kaiser-Wilhelm-Allee 1		Leverkusen		51373	GM	31-503-4629	BAYER CROPSCIENCE LP - KC	8400 HAWTHORNE RD		KANSAS CITY	JACKSON COUNTY	MO	64120	82-822-7210	200000576	110000000000	325320 Pesticide And Other Agricultural Chemical Manufacturing	Manufacture									CBI	CBI	CBI	1,000,000 ‚Äì <20,000,000	1,000,000 ‚Äì <20,000,000	1,000,000 ‚Äì <20,000,000	1,000,000 ‚Äì <20,000,000
1,2-Benzenediamine	30.0502	-90.632	723898	95-54-5	95545	CASRN	NALCO- AN ECOLAB COMPANY	1601 WEST DIEHL RD		NAPERVILLE	DuPage	IL	60563	00-496-2403									NALCO COMPANY (GARYVILLE 0109)	3628 HIGHWAY 44		GARYVILLE	ST. JOHN THE BAPTIST PARISH	LA	70051	01-143-5430	TSCA5879	110007000000	325110 Petrochemical Manufacturing	Both						0	0	0	123845	0	0	1,000,000 ‚Äì <20,000,000	1,000,000 ‚Äì <20,000,000	1,000,000 ‚Äì <20,000,000	1,000,000 ‚Äì <20,000,000
1,2-Benzenediamine, 3-methyl-	30.2396	-90.9922	735190	2687-25-4	2687254	CASRN	BASF CORP	100 Park Ave		Florham Park	Morris	NJ	7932	00-130-7032	BASF SE	Carl-Bosch-Str-38		Ludwigshafen		67059	GM	31-500-0554	BASF CORP	8404 RIVER ROAD HIGHWAY 75		GEISMAR	ASCENSION	LA	70734	04-077-6809	100604801	110001000000	325199 All Other Basic Organic Chemical Manufacturing	Manufacture	325613 Surface Active Agent Manufacturing	Manufacture	325211 Plastics Material And Resin Manufacturing	Manufacture	Manufacture	CBI	CBI	CBI	CBI	0	CBI	1,000,000 ‚Äì <20,000,000	<1,000,000	<1,000,000	1,000,000 ‚Äì <20,000,000
1,2-Benzenediamine, 3-methyl-	40.7734	-74.4261	726723	2687-25-4	2687254	CASRN	BASF Corporation	100 Park Avenue		Florham Park	NJ	MI	7932	00-130-7032	BASF SE	Carl-Bosch Strasse 38		Ludwigshafen		60756	GM	31-500-0554	BASF IMPORTS PART 1	100 PARK AVE		FLORHAM PARK	MORRIS COUNTY	NJ	7932	00-130-7032	TSCA130148	110070000000	325199 All Other Basic Organic Chemical Manufacturing	Import						0	0	0	0	CBI	0	1,000,000 ‚Äì <20,000,000	<1,000,000	<1,000,000	1,000,000 ‚Äì <20,000,000
1,2-Benzenediamine, 3-methyl-	43.615	-84.1987	738008	2687-25-4	2687254	CASRN	The Dow Chemical Co	2211 H.H. Dow Way		Midland	Midland	MI	48674	08-036-1339									THE DOW CHEMICAL CO	2211 H.H. DOW WAY		MIDLAND	MIDLAND COUNTY	MI	48674	08-036-1339	TSCA10057799	110071000000	325199 All Other Basic Organic Chemical Manufacturing	Withheld	325211 Plastics Material And Resin Manufacturing	Withheld			CBI	CBI	CBI	CBI	CBI	CBI	CBI	1,000,000 ‚Äì <20,000,000	<1,000,000	<1,000,000	1,000,000 ‚Äì <20,000,000
1,2-Benzenediamine, 4-methyl-	30.2396	-90.9922	735194	496-72-0	496720	CASRN	BASF CORP	100 Park Ave		Florham Park	Morris	NJ	7932	00-130-7032	BASF SE	Carl-Bosch-Str-38		Ludwigshafen		67059	GM	31-500-0554	BASF CORP	8404 RIVER ROAD HIGHWAY 75		GEISMAR	ASCENSION	LA	70734	04-077-6809	100604801	110001000000	325199 All Other Basic Organic Chemical Manufacturing	Manufacture	325613 Surface Active Agent Manufacturing	Manufacture	325211 Plastics Material And Resin Manufacturing	Manufacture	Manufacture	CBI	CBI	CBI	CBI	0	CBI	1,000,000 ‚Äì <20,000,000	1,000,000 ‚Äì <20,000,000	<1,000,000	1,000,000 ‚Äì <20,000,000
1,2-Benzenediamine, 4-methyl-	40.7734	-74.4261	726809	496-72-0	496720	CASRN	BASF Corporation	100 Park Avenue		Florham Park	NJ	MI	7932	00-130-7032	BASF SE	Carl-Bosch Strasse 38		Ludwigshafen		60756	GM	31-500-0554	BASF IMPORTS PART 1	100 PARK AVE		FLORHAM PARK	MORRIS COUNTY	NJ	7932	00-130-7032	TSCA130148	110070000000	325199 All Other Basic Organic Chemical Manufacturing	Import						0	0	0	0	CBI	0	1,000,000 ‚Äì <20,000,000	1,000,000 ‚Äì <20,000,000	<1,000,000	1,000,000 ‚Äì <20,000,000
1,2-Benzenediamine, 4-methyl-	43.615	-84.1987	738031	496-72-0	496720	CASRN	The Dow Chemical Co	2211 H.H. Dow Way		Midland	Midland	MI	48674	08-036-1339									THE DOW CHEMICAL CO	2211 H.H. DOW WAY		MIDLAND	MIDLAND COUNTY	MI	48674	08-036-1339	TSCA10057799	110071000000	325199 All Other Basic Organic Chemical Manufacturing	Withheld	325211 Plastics Material And Resin Manufacturing	Withheld			CBI	CBI	CBI	CBI	CBI	CBI	CBI	1,000,000 ‚Äì <20,000,000	1,000,000 ‚Äì <20,000,000	<1,000,000	1,000,000 ‚Äì <20,000,000
1,2-Benzenedicarboxylic acid, 1,2-bis(2-butoxyethyl) ester	36.3209	-79.6491	717786	117-83-9	117839	CASRN	DYSTAR LP	209 WATLINGTON INDUSTRIAL DRIVE		REIDSVILLE	Rockingham County	NC	27320	96-726-9908									DYSTAR LP	209 WATLINGTON INDUSTRIAL DRIVE		REIDSVILLE		NC	27320	96-726-9908	TSCA6855	110010000000	424690 Other Chemical And Allied Products Merchant Wholesalers	Manufacture									0	39812	0	0	0	39812	0
1,2-Benzenedicarboxylic acid, 1,2-bis(2-ethylhexyl) ester	29.6535	-82.4068	700627	117-81-7	117817	CASRN	ALLCHEM INDUSTRIES HOLDING CORP	6010 NW FIRST PLACE		GAINESVILLE	Alachua	FL	32607	05-945-5423									ALLCHEM INDUSTRIES INDUSTRIAL CHEMICALS GROUP, INC	6010 NW 1ST PL		GAINESVILLE	ALACHUA COUNTY	FL	32607	11-120-7127	TSCA110582	110069000000	424690 Other Chemical And Allied Products Merchant Wholesalers	Import					Import	0	35280	35280	0	0	0	10,000,000 ‚Äì <50,000,000	10,000,000 ‚Äì <50,000,000	10,000,000 ‚Äì <50,000,000	10,000,000 ‚Äì <50,000,000
1,2-Benzenedicarboxylic acid, 1,2-bis(2-ethylhexyl) ester	29.7459	-95.4577	719882	117-81-7	117817	CASRN	Tribute Energy, Inc.	2100 W. Loop South	Suite 1500	Houston	Harris	TX	77027	80-823-8484									TRIBUTE ENERGY, INC.	2100 WEST LOOP S	SUITE 1500	HOUSTON	HARRIS COUNTY	TX	77027	80-823-8484	TSCA10079939	110071000000	424690 Other Chemical And Allied Products Merchant Wholesalers	Import					Import	0	4276967	4276967	5396915	6481589	6225853	10,000,000 ‚Äì <50,000,000	10,000,000 ‚Äì <50,000,000	10,000,000 ‚Äì <50,000,000	10,000,000 ‚Äì <50,000,000
1,2-Benzenedicarboxylic acid, 1,2-bis(2-ethylhexyl) ester	29.7539	-95.457	712089	117-81-7	117817	CASRN	Tricon International, Ltd	777 Post Oak Blvd, Suite 550		Houston	Harris	TX	77056	02-314-0093									TRICON INTERNATIONAL, LTD	777 POST OAK BLVD, SUITE 550		HOUSTON		TX	77056	02-314-0093	TSCA76682	110061000000	424690 Other Chemical And Allied Products Merchant Wholesalers	Import									0	0	CBI	10,000,000 ‚Äì <50,000,000	10,000,000 ‚Äì <50,000,000	10,000,000 ‚Äì <50,000,000	10,000,000 ‚Äì <50,000,000
1,2-Benzenedicarboxylic acid, 1,2-bis(2-ethylhexyl) ester	30.1546	-95.4631	736999	117-81-7	117817	CASRN	SHRIEVE CHEMICAL COMPANY, LLC	1755 WOODSTEAD COURT		THE WOODLANDS	Montgomery	TX	77380	09-397-2602									SHRIEVE CHEMICAL COMPANY, LLC	1755 WOODSTEAD CT		SPRING	MONTGOMERY COUNTY	TX	77380	09-397-2602	TSCA10051072	110071000000	325998 All Other Miscellaneous Chemical Product And Preparation Manufacturing	Withheld	424690 Other Chemical And Allied Products Merchant Wholesalers	Withheld			CBI	CBI	CBI	CBI	CBI	CBI	0	10,000,000 ‚Äì <50,000,000	10,000,000 ‚Äì <50,000,000	10,000,000 ‚Äì <50,000,000	10,000,000 ‚Äì <50,000,000
1,2-Benzenedicarboxylic acid, 1,2-bis(2-ethylhexyl) ester	30.1605	-95.4562	710865	117-81-7	117817	CASRN	UNIVAR SOLUTIONS INC.	3075 Highland Pkwy., Ste. 200		Downers Grove	DuPage	IL	60515-5560	09-877-7053									UNIVAR SOLUTIONS USA THE WOODLANDS	3 WATERWAY SQUARE PL STE 1000		THE WOODLANDS	MONTGOMERY	TX	77380-3488	08-055-6410	TSCA10066719	110071000000	424690 Other Chemical And Allied Products Merchant Wholesalers	Import					Import	0	305516	305516	0	0	0	10,000,000 ‚Äì <50,000,000	10,000,000 ‚Äì <50,000,000	10,000,000 ‚Äì <50,000,000	10,000,000 ‚Äì <50,000,000
1,2-Benzenedicarboxylic acid, 1,2-bis(2-ethylhexyl) ester	33.4146	-86.8032	729756	117-81-7	117817	CASRN	INDUSTRIAL CHEMICALS INC.	2042 MONTREAT DRIVE		BIRMINGHAM	JEFFERSON	AL	35216	05-097-8329									INDUSTRIAL CHEMICALS INC	2042 MONTREAT DRIVE		VESTAVIA HILLS	JEFFERSON COUNTY	AL	35216	05-097-8329	TSCA4338	110016000000	424690 Other Chemical And Allied Products Merchant Wholesalers	Import					Import	0	257484	257484	37699	346343	220469	10,000,000 ‚Äì <50,000,000	10,000,000 ‚Äì <50,000,000	10,000,000 ‚Äì <50,000,000	10,000,000 ‚Äì <50,000,000
1,2-Benzenedicarboxylic acid, 1,2-bis(2-ethylhexyl) ester	33.85	-84.3755	730262	117-81-7	117817	CASRN	LG CHEM AMERICA, INC.	3475 PIEDMONT ROAD NE, SUITE 1200		ATLANTA	Fulton	GA	30305	19-465-5882	LG CHEM LTD	128, Yeoui-daero, Yeongdeungpo-gu		Seoul		7336	KS	69-512-8893	LG CHEM AMERICA, INC.	3475 PIEDMONT RD NE		ATLANTA	FULTON COUNTY	GA	30305	19-465-5882	TSCA99702	110067000000	424690 Other Chemical And Allied Products Merchant Wholesalers						Import	CBI	CBI	CBI	CBI	CBI	CBI	10,000,000 ‚Äì <50,000,000	10,000,000 ‚Äì <50,000,000	10,000,000 ‚Äì <50,000,000	10,000,000 ‚Äì <50,000,000
1,2-Benzenedicarboxylic acid, 1,2-bis(2-ethylhexyl) ester	35.1022	-80.8867	739836	117-81-7	117817	CASRN	MEXICHEM SPECIALTY COMPOUNDS INC dba ALPHAGARY CORP	170 PIONEER DR		LEOMINSTER	WORCESTER	MA	1453	09-743-4484	ORBIA ADVANCE CORP SAB DE CV	Paseo de la Reforma No. 483 Piso 47		Mexico City	Cuauhtemoc	6500	MX	81-099-5415	ALPHAGARY CORP	9635 INDUSTRIAL DR.		PINEVILLE	MECKLENBURG COUNTY	NC	28134	09-743-4484	TSCA7648	110000000000	325991 Custom Compounding Of Purchased Resins	Import					Import	0	3230008	3230008	3350606	5103068	6219949	10,000,000 ‚Äì <50,000,000	10,000,000 ‚Äì <50,000,000	10,000,000 ‚Äì <50,000,000	10,000,000 ‚Äì <50,000,000
1,2-Benzenedicarboxylic acid, 1,2-bis(2-ethylhexyl) ester	35.7433	-78.8478	709431	117-81-7	117817	CASRN	M.A.GLOBAL RESOURCES INC	1028 BRANCH LINE LANE		APEX	wake	NC	27502	39-323-6166									M.A.GLOBAL RESOURCES INC	1028 BRANCH LINE LN		APEX	WAKE COUNTY	NC	27502	39-323-6166	TSCA122883	110069000000	424690 Other Chemical And Allied Products Merchant Wholesalers	Import					Import	0	89825	89825	44092	88000	132000	10,000,000 ‚Äì <50,000,000	10,000,000 ‚Äì <50,000,000	10,000,000 ‚Äì <50,000,000	10,000,000 ‚Äì <50,000,000
1,2-Benzenedicarboxylic acid, 1,2-bis(2-ethylhexyl) ester	36.5359	-82.5493	722433	117-81-7	117817	CASRN	EASTMAN CHEMICAL COMPANY, INC	200 SOUTH WILCOX DRIVE		KINGSPORT	Sullivan	TN	37660-5147	80-889-8381									EASTMAN CHEMICAL CO. B-280 OFF	200 SOUTH WILCOX DRIVE		KINGSPORT	SULLIVAN	TN	37660-5147	80-889-8381	TSCA4101	110057000000	325998 All Other Miscellaneous Chemical Product And Preparation Manufacturing	Withheld					CBI	CBI	CBI	CBI	CBI	CBI	CBI	10,000,000 ‚Äì <50,000,000	10,000,000 ‚Äì <50,000,000	10,000,000 ‚Äì <50,000,000	10,000,000 ‚Äì <50,000,000
1,2-Benzenedicarboxylic acid, 1,2-bis(2-ethylhexyl) ester	37.7932	-122.4	729253	117-81-7	117817	CASRN	Wilbur-Ellis Company LLC	345 California Street	27th Floor	San Francisco	San Francisco	CA	94104	00-691-2075									CONNELL BROS. CO. LLC	345 CALIFORNIA ST	FLOOR 27	SAN FRANCISCO	SAN FRANCISCO COUNTY	CA	94104	00-691-3479	TSCA124303	110070000000	424910 Farm Supplies Merchant Wholesalers	Import					Import	0	35274	35274	0	35274	70547	10,000,000 ‚Äì <50,000,000	10,000,000 ‚Äì <50,000,000	10,000,000 ‚Äì <50,000,000	10,000,000 ‚Äì <50,000,000
1,2-Benzenedicarboxylic acid, 1,2-bis(2-ethylhexyl) ester	39.5047	-87.3623	701103	117-81-7	117817	CASRN	GEON Performance Solutions LLC	25777 Detroit Road, Suite 202		Westlake	Cuyahoga	OH	44145	11-724-7947	SK ECHO HOLDINGS S R L	6 rue Eugne Ruppert		Luxembourg		L 2453	LU	37-176-4800	GEON PERFORMANCE SOLUTIONS LLC	3100 N 35TH ST		TERRE HAUTE	VIGO COUNTY	IN	47804	12-157-4909	TSCA6527	110000000000	325211 Plastics Material And Resin Manufacturing	Both						0	0	0	0	44100	87200	10,000,000 ‚Äì <50,000,000	10,000,000 ‚Äì <50,000,000	10,000,000 ‚Äì <50,000,000	10,000,000 ‚Äì <50,000,000
1,2-Benzenedicarboxylic acid, 1,2-bis(2-ethylhexyl) ester	40.7285	-74.1211	726283	117-81-7	117817	CASRN	G.J. CHEMICAL CO., INC.	40 VERONICA AVENUE		SOMERSET	Somerset	NJ	8873	07-824-5503									GJ CHEMICAL CO INC	128 DOREMUS AVENUE		NEWARK	ESSEX COUNTY	NJ	07105-4838	83-792-0909	100600139	110014000000	424690 Other Chemical And Allied Products Merchant Wholesalers						Import	0	573312	573312	681712	951690	1035760	10,000,000 ‚Äì <50,000,000	10,000,000 ‚Äì <50,000,000	10,000,000 ‚Äì <50,000,000	10,000,000 ‚Äì <50,000,000
1,2-Benzenedicarboxylic acid, 1,2-bis(2-ethylhexyl) ester	40.7486	-73.9855	705262	117-81-7	117817	CASRN	ALAC International Inc	350 Fifth Avenue	Suite 3015	New York	New York	NY	10118	36-282-4687									ALAC INTERNATIONAL INC.	350 5TH AVE		NEW YORK	NEW YORK COUNTY	NY	10118	36-282-4687	TSCA10050149	110071000000	424610 Plastics Materials And Basic Forms And Shapes Merchant Wholesalers	Import					Import	0	112875	112875	157115	326229	590833	10,000,000 ‚Äì <50,000,000	10,000,000 ‚Äì <50,000,000	10,000,000 ‚Äì <50,000,000	10,000,000 ‚Äì <50,000,000
1,2-Benzenedicarboxylic acid, 1,2-bis(2-ethylhexyl) ester	40.7702	-74.3635	717458	117-81-7	117817	CASRN	Formosa Plastics Corporation, U.S.A.	9 PEACH TREE HILL ROAD		Livingston	NJ	NJ	7039	03-994-4004									FORMOSA GLOBAL SOLUTIONS, INC.	9 PEACH TREE HILL RD		LIVINGSTON	ESSEX COUNTY	NJ	7039	03-994-4004	200001893	110004000000	325211 Plastics Material And Resin Manufacturing	Import					Import	0	480453	480453	437485	964480	0	10,000,000 ‚Äì <50,000,000	10,000,000 ‚Äì <50,000,000	10,000,000 ‚Äì <50,000,000	10,000,000 ‚Äì <50,000,000
1,2-Benzenedicarboxylic acid, 1,2-bis(2-ethylhexyl) ester	40.9655	-81.4686	736258	117-81-7	117817	CASRN	ChemSpec, Ltd.	1559 Corporate Woods Parkway	Suite 150	Uniontown	Summit County	OH	44685	13-922-0284	SAFIC ALCAN	13 Cours Valmy	92977 Paris La Dfense Cedex	Paris			FR	13-922-0284	CHEMSPEC, LTD.	1559 CORPORATE WOODS PKWY	SUITE 150	UNIONTOWN	SUMMIT COUNTY	OH	44685	13-922-0284	TSCA115201	110069000000	424690 Other Chemical And Allied Products Merchant Wholesalers	Import					Import	0	131456	131456	134184	88184	94150	10,000,000 ‚Äì <50,000,000	10,000,000 ‚Äì <50,000,000	10,000,000 ‚Äì <50,000,000	10,000,000 ‚Äì <50,000,000
1,2-Benzenedicarboxylic acid, 1,2-bis(2-ethylhexyl) ester	41.0611	-81.4725	717624	117-81-7	117817	CASRN	HARWICK STANDARD DISTRIBUTION CORPORATION	60 S. SEIBERLING STREET		AKRON	SUMMIT	OH	44305	05-724-7793									HARWICK STANDARD DISTRIBUTION CORP	60 S. SEIBERLING ST.		AKRON	SUMMIT COUNTY	OH	44305	05-724-7793	100603283	110000000000	424690 Other Chemical And Allied Products Merchant Wholesalers	Import					Import	0	105623	105623	176338	43736	0	10,000,000 ‚Äì <50,000,000	10,000,000 ‚Äì <50,000,000	10,000,000 ‚Äì <50,000,000	10,000,000 ‚Äì <50,000,000
1,2-Benzenedicarboxylic acid, 1,2-bis(2-ethylhexyl) ester	41.3753	-82.1402	708681	117-81-7	117817	CASRN	POLYONE CORPORATION	33587 WALKER ROAD		AVON LAKE	Lorain	OH	44012	84-508-2861									Elyria Distribution Ctr.	1404 Lowell Street		Elyria		OH	44035	11-724-7947	TSCA6537	110057000000	424610 Plastics Materials And Basic Forms And Shapes Merchant Wholesalers	Import									25794	49604	51588	10,000,000 ‚Äì <50,000,000	10,000,000 ‚Äì <50,000,000	10,000,000 ‚Äì <50,000,000	10,000,000 ‚Äì <50,000,000
1,2-Benzenedicarboxylic acid, 1,2-bis(2-ethylhexyl) ester	41.494	-71.3762	726316	117-81-7	117817	CASRN	The Chemical Company	44 Southwest Avenue		Jamestown	Newport	RI	2835	15-362-2584									THE CHEMICAL COMPANY	44 SOUTHWEST AVE	PO BOX 436	JAMESTOWN	NEWPORT COUNTY	RI	2835	15-362-2584	TSCA108221	110068000000	424690 Other Chemical And Allied Products Merchant Wholesalers	Import					Import	CBI	CBI	CBI	CBI	CBI	CBI	10,000,000 ‚Äì <50,000,000	10,000,000 ‚Äì <50,000,000	10,000,000 ‚Äì <50,000,000	10,000,000 ‚Äì <50,000,000
1,2-Benzenedicarboxylic acid, 1,2-bis(2-ethylhexyl) ester	42.5329	-71.7081	739078	117-81-7	117817	CASRN	MEXICHEM SPECIALTY COMPOUNDS INC dba ALPHAGARY CORP	170 PIONEER DR		LEOMINSTER	WORCESTER	MA	1453	09-743-4484	ORBIA ADVANCE CORP SAB DE CV	Paseo de la Reforma No. 483 Piso 47		Mexico City	Cuauhtemoc	6500	MX	81-099-5415	ALPHAGARY CORP	170 PIONEER DRIVE		LEOMINSTER	WORCESTER	MA	01453-3474	09-743-4484	TSCA7647	110000000000	325991 Custom Compounding Of Purchased Resins	Import					Import	0	214378	214378	1559242	9026933	8033157	10,000,000 ‚Äì <50,000,000	10,000,000 ‚Äì <50,000,000	10,000,000 ‚Äì <50,000,000	10,000,000 ‚Äì <50,000,000
1,2-Benzenedicarboxylic acid, 1,2-bis(2-ethylhexyl) ester	42.8171	-73.6653	715822	117-81-7	117817	CASRN	MOMENTIVE PERFORMANCE MATERIALS	260 Hudson River Road		Waterford	Saratoga	NY	12188	00-208-0034									MOMENTIVE PERFORMANCE MATERIALS - WATERFORD	260 HUDSON RIVER RD		WATERFORD	SARATOGA COUNTY	NY	12188	00-208-0034	100607111	110000000000	325188 All Other Basic Inorganic Chemical Manufacturing	Both	325211 Plastics Material And Resin Manufacturing	Both	325199 All Other Basic Organic Chemical Manufacturing	Both	Manufacture	2985	0	2985	2483	3936	3100	10,000,000 ‚Äì <50,000,000	10,000,000 ‚Äì <50,000,000	10,000,000 ‚Äì <50,000,000	10,000,000 ‚Äì <50,000,000
1,2-Benzenedicarboxylic acid, 1,2-bis(2-methylpropyl) ester	36.0402	-79.7786	717477	84-69-5	84695	CASRN	LANXESS CORPORATION	111 RIDC PARK WEST DRIVE		PITTSBURGH	Allegheny	PA	15275	14-585-8770	LANXESS DEUTSCHLAND GMBH	Kennedyplatz 1		Koln		50569	GM	31-546-4482	LANXESS CORPORATION GREENSBORO	520 BROOME RD.		GREENSBORO	GUILFORD COUNTY	NC	27406-3799	06-179-5696	100608461	110000000000	325199 All Other Basic Organic Chemical Manufacturing	Manufacture					Manufacture	407303	0	407303	403833	384591	440833	407303	403833	384591	440833
1,2-Benzenedicarboxylic acid, 1,2-bis(2-propylheptyl) ester	26.7133	-80.0516	714889	53306-54-0	53306540	CASRN	GREENCHEM INDUSTRIES LLC	222 CLEMATIS STREET	Suite 207	WEST PALM BEACH	Palm Beach	FL	33401	80-577-2717									GREENCHEM	222 CLEMATIS ST	SUITE 207	WEST PALM BEACH	PALM BEACH COUNTY	FL	33401	80-577-2717	TSCA124127	110070000000	424690 Other Chemical And Allied Products Merchant Wholesalers						Import	CBI	CBI	CBI	CBI	CBI	CBI	10,000,000 ‚Äì <50,000,000	10,000,000 ‚Äì <50,000,000	10,000,000 ‚Äì <50,000,000	10,000,000 ‚Äì <50,000,000
1,2-Benzenedicarboxylic acid, 1,2-bis(2-propylheptyl) ester	29.7459	-95.4577	719887	53306-54-0	53306540	CASRN	Tribute Energy, Inc.	2100 W. Loop South	Suite 1500	Houston	Harris	TX	77027	80-823-8484									TRIBUTE ENERGY, INC.	2100 WEST LOOP S	SUITE 1500	HOUSTON	HARRIS COUNTY	TX	77027	80-823-8484	TSCA10079939	110071000000	424690 Other Chemical And Allied Products Merchant Wholesalers	Import					Import	0	44092	44092	44092	0	0	10,000,000 ‚Äì <50,000,000	10,000,000 ‚Äì <50,000,000	10,000,000 ‚Äì <50,000,000	10,000,000 ‚Äì <50,000,000
1,2-Benzenedicarboxylic acid, 1,2-bis(2-propylheptyl) ester	30.1546	-95.4631	737018	53306-54-0	53306540	CASRN	SHRIEVE CHEMICAL COMPANY, LLC	1755 WOODSTEAD COURT		THE WOODLANDS	Montgomery	TX	77380	09-397-2602									SHRIEVE CHEMICAL COMPANY, LLC	1755 WOODSTEAD CT		SPRING	MONTGOMERY COUNTY	TX	77380	09-397-2602	TSCA10051072	110071000000	325998 All Other Miscellaneous Chemical Product And Preparation Manufacturing	Both	424690 Other Chemical And Allied Products Merchant Wholesalers	Both							CBI	CBI	0	10,000,000 ‚Äì <50,000,000	10,000,000 ‚Äì <50,000,000	10,000,000 ‚Äì <50,000,000	10,000,000 ‚Äì <50,000,000
1,2-Benzenedicarboxylic acid, 1,2-bis(2-propylheptyl) ester	35.1022	-80.8867	739839	53306-54-0	53306540	CASRN	MEXICHEM SPECIALTY COMPOUNDS INC dba ALPHAGARY CORP	170 PIONEER DR		LEOMINSTER	WORCESTER	MA	1453	09-743-4484	ORBIA ADVANCE CORP SAB DE CV	Paseo de la Reforma No. 483 Piso 47		Mexico City	Cuauhtemoc	6500	MX	81-099-5415	ALPHAGARY CORP	9635 INDUSTRIAL DR.		PINEVILLE	MECKLENBURG COUNTY	NC	28134	09-743-4484	TSCA7648	110000000000	325991 Custom Compounding Of Purchased Resins	Import					Import	0	1276929	1276929	1055832	2363827	1518832	10,000,000 ‚Äì <50,000,000	10,000,000 ‚Äì <50,000,000	10,000,000 ‚Äì <50,000,000	10,000,000 ‚Äì <50,000,000
1,2-Benzenedicarboxylic acid, 1,2-bis(2-propylheptyl) ester	38.1379	-85.7532	701576	53306-54-0	53306540	CASRN	GEON Performance Solutions LLC	25777 Detroit Road, Suite 202		Westlake	Cuyahoga	OH	44145	11-724-7947	SK ECHO HOLDINGS S R L	6 rue Eugne Ruppert		Luxembourg		L 2453	LU	37-176-4800	GEON PERFORMANCE SOLUTIONS LLC	7755 NATIONAL TPKE	UNIT 190	LOUISVILLE	JEFFERSON COUNTY	KY	40214	11-733-5744	TSCA128391	110070000000	424610 Plastics Materials And Basic Forms And Shapes Merchant Wholesalers	Both					Import	0	34700	34700	30800	28800	30600	10,000,000 ‚Äì <50,000,000	10,000,000 ‚Äì <50,000,000	10,000,000 ‚Äì <50,000,000	10,000,000 ‚Äì <50,000,000
1,2-Benzenedicarboxylic acid, 1,2-bis(2-propylheptyl) ester	38.222	-85.8298	702119	53306-54-0	53306540	CASRN	GEON Performance Solutions LLC	25777 Detroit Road, Suite 202		Westlake	Cuyahoga	OH	44145	11-724-7947	SK ECHO HOLDINGS S R L	6 rue Eugne Ruppert		Luxembourg		L 2453	LU	37-176-4800	GEON PERFORMANCE SOLUTIONS LLC	4250 BELLS LN		LOUISVILLE	JEFFERSON COUNTY	KY	40211	80-104-0098	TSCA6525	110040000000	325211 Plastics Material And Resin Manufacturing	Both					Import	0	532200	532200	1293000	1613000	568800	10,000,000 ‚Äì <50,000,000	10,000,000 ‚Äì <50,000,000	10,000,000 ‚Äì <50,000,000	10,000,000 ‚Äì <50,000,000
1,2-Benzenedicarboxylic acid, 1,2-bis(2-propylheptyl) ester	39.5047	-87.3623	701107	53306-54-0	53306540	CASRN	GEON Performance Solutions LLC	25777 Detroit Road, Suite 202		Westlake	Cuyahoga	OH	44145	11-724-7947	SK ECHO HOLDINGS S R L	6 rue Eugne Ruppert		Luxembourg		L 2453	LU	37-176-4800	GEON PERFORMANCE SOLUTIONS LLC	3100 N 35TH ST		TERRE HAUTE	VIGO COUNTY	IN	47804	12-157-4909	TSCA6527	110000000000	325211 Plastics Material And Resin Manufacturing	Both					Import	0	251700	251700	0	0	79200	10,000,000 ‚Äì <50,000,000	10,000,000 ‚Äì <50,000,000	10,000,000 ‚Äì <50,000,000	10,000,000 ‚Äì <50,000,000
1,2-Benzenedicarboxylic acid, 1,2-bis(2-propylheptyl) ester	40.7486	-73.9855	705267	53306-54-0	53306540	CASRN	ALAC International Inc	350 Fifth Avenue	Suite 3015	New York	New York	NY	10118	36-282-4687									ALAC INTERNATIONAL INC.	350 5TH AVE		NEW YORK	NEW YORK COUNTY	NY	10118	36-282-4687	TSCA10050149	110071000000	424610 Plastics Materials And Basic Forms And Shapes Merchant Wholesalers	Import					Import	0	6263214	6263214	5811434	5172912	2602207	10,000,000 ‚Äì <50,000,000	10,000,000 ‚Äì <50,000,000	10,000,000 ‚Äì <50,000,000	10,000,000 ‚Äì <50,000,000
1,2-Benzenedicarboxylic acid, 1,2-bis(2-propylheptyl) ester	40.7625	-73.9743	702955	53306-54-0	53306540	CASRN	ICC Industries Inc.	725 Fifth Avenue	14th Floor	New York	New York	NY	10022	04-617-7341									ICC CHEMICAL CORP	725 5TH AVE		NEW YORK	NEW YORK COUNTY	NY	10022	19-281-3111	TSCA10058156	110071000000	424690 Other Chemical And Allied Products Merchant Wholesalers	Import									CBI	CBI	CBI	10,000,000 ‚Äì <50,000,000	10,000,000 ‚Äì <50,000,000	10,000,000 ‚Äì <50,000,000	10,000,000 ‚Äì <50,000,000
1,2-Benzenedicarboxylic acid, 1,2-bis(2-propylheptyl) ester	40.7734	-74.4261	726829	53306-54-0	53306540	CASRN	BASF Corporation	100 Park Avenue		Florham Park	NJ	MI	7932	00-130-7032	BASF SE	Carl-Bosch Strasse 38		Ludwigshafen		60756	GM	31-500-0554	BASF IMPORTS PART 1	100 PARK AVE		FLORHAM PARK	MORRIS COUNTY	NJ	7932	00-130-7032	TSCA130148	110070000000	325199 All Other Basic Organic Chemical Manufacturing	Import					Import	CBI	CBI	CBI	CBI	CBI	CBI	10,000,000 ‚Äì <50,000,000	10,000,000 ‚Äì <50,000,000	10,000,000 ‚Äì <50,000,000	10,000,000 ‚Äì <50,000,000
1,2-Benzenedicarboxylic acid, 1,2-bis(2-propylheptyl) ester	40.855	-74.4142	701982	53306-54-0	53306540	CASRN	Evonik Corporation	299 Jefferson Rd		Parsippany	Morris	NJ	7054	79-153-3958									EVONIK CORPORATION	299 JEFFERSON ROAD		PARSIPPANY	MORRIS COUNTY	NJ	7054	79-153-3958	100605812	110057000000	325998 All Other Miscellaneous Chemical Product And Preparation Manufacturing	Both					Import	CBI	CBI	CBI	CBI	CBI	CBI	10,000,000 ‚Äì <50,000,000	10,000,000 ‚Äì <50,000,000	10,000,000 ‚Äì <50,000,000	10,000,000 ‚Äì <50,000,000
1,2-Benzenedicarboxylic acid, 1,2-bis(2-propylheptyl) ester	40.8934	-74.2684	713422	53306-54-0	53306540	CASRN	Soyventis North America LLC	695 Route 46 W	Ste 406	Fairfield	Essex	NJ	7004	83-301-4959									SOYVENTIS NORTH AMERICA LLC	695 ROUTE 46 W	STE 406	FAIRFIELD	ESSEX COUNTY	NJ	7004	83-301-4959	TSCA10051418	110071000000	422690 Other Chemical And Allied Products Wholesalers	Import						0	0	0	80000	139390	19850	10,000,000 ‚Äì <50,000,000	10,000,000 ‚Äì <50,000,000	10,000,000 ‚Äì <50,000,000	10,000,000 ‚Äì <50,000,000
1,2-Benzenedicarboxylic acid, 1,2-bis(2-propylheptyl) ester	41.494	-71.3762	726327	53306-54-0	53306540	CASRN	The Chemical Company	44 Southwest Avenue		Jamestown	Newport	RI	2835	15-362-2584									THE CHEMICAL COMPANY	44 SOUTHWEST AVE	PO BOX 436	JAMESTOWN	NEWPORT COUNTY	RI	2835	15-362-2584	TSCA108221	110068000000	424690 Other Chemical And Allied Products Merchant Wholesalers	Import					Import	CBI	CBI	CBI	0	0	0	10,000,000 ‚Äì <50,000,000	10,000,000 ‚Äì <50,000,000	10,000,000 ‚Äì <50,000,000	10,000,000 ‚Äì <50,000,000
1,2-Benzenedicarboxylic acid, 1,2-bis(2-propylheptyl) ester	41.7027	-83.5309	735948	53306-54-0	53306540	CASRN	PERSTORP POLYOLS	600 MATZINGER		TOLEDO	Lucas	OH	43612	14-433-3010	PERSTORP AB	Perstorp Industripark		Perstorp	Skane	28480	SW	35-397-2060	PERSTORP POLYOLS INC	600 MATZINGER ROAD		TOLEDO		OH	43612-2695	14-433-3010	TSCA6011	110000000000	325199 All Other Basic Organic Chemical Manufacturing	Both					Import	CBI	CBI	CBI	CBI	CBI	CBI	10,000,000 ‚Äì <50,000,000	10,000,000 ‚Äì <50,000,000	10,000,000 ‚Äì <50,000,000	10,000,000 ‚Äì <50,000,000
1,2-Benzenedicarboxylic acid, 1,2-bis(2-propylheptyl) ester	42.5329	-71.7081	739082	53306-54-0	53306540	CASRN	MEXICHEM SPECIALTY COMPOUNDS INC dba ALPHAGARY CORP	170 PIONEER DR		LEOMINSTER	WORCESTER	MA	1453	09-743-4484	ORBIA ADVANCE CORP SAB DE CV	Paseo de la Reforma No. 483 Piso 47		Mexico City	Cuauhtemoc	6500	MX	81-099-5415	ALPHAGARY CORP	170 PIONEER DRIVE		LEOMINSTER	WORCESTER	MA	01453-3474	09-743-4484	TSCA7647	110000000000	325991 Custom Compounding Of Purchased Resins	Import					Import	0	472727	472727	703186	1442125	819627	10,000,000 ‚Äì <50,000,000	10,000,000 ‚Äì <50,000,000	10,000,000 ‚Äì <50,000,000	10,000,000 ‚Äì <50,000,000
1,2-Benzenedicarboxylic acid, 1,2-bis(2-propylheptyl) ester	42.9091	-87.9181	709503	53306-54-0	53306540	CASRN	HENKEL CORPORATION	1 HENKEL WAY		ROCKY HILL	Hartford	CT	6067	08-088-7708									HENKEL OAK CREEK	420 W MARQUETTE AVE		OAK CREEK	MILWAUKEE COUNTY	WI	53154	82-832-8091	TSCA121961	110069000000	325520 Adhesive Manufacturing	Both					Import	0	30543	30543	9048	24128	5278	10,000,000 ‚Äì <50,000,000	10,000,000 ‚Äì <50,000,000	10,000,000 ‚Äì <50,000,000	10,000,000 ‚Äì <50,000,000
1,2-Benzenedicarboxylic acid, 1,2-di-2-propen-1-yl ester	40.8728	-74.448	705872	131-17-9	131179	CASRN	Miki Sangyo (USA) Inc	400 Interpace Parkway		Parsippany	Morris County	NJ	7054	07-770-3346	MIKI & CO LTD	3-15-5, Nihonbashi		Chuo-ku		103-0027	JA	69-058-0097	MIKI SANGYO (USA) INC.	400 INTERPACE PKWY		PARSIPPANY	MORRIS COUNTY	NJ	7054	07-770-3346	TSCA123341	110070000000	424690 Other Chemical And Allied Products Merchant Wholesalers	Import					Import	0	792711	792711	329132	986960	842910	<1,000,000	500,000 ‚Äì <1,000,000	1,000,000 ‚Äì <20,000,000	1,000,000 ‚Äì <10,000,000
1,2-Benzenedicarboxylic acid, 1,2-di-2-propen-1-yl ester	41.0348	-73.7666	723805	131-17-9	131179	CASRN	ITOCHU International Inc.	1251 Avenue of the Americas		New York	New York	NY	10020	00-698-5956									ITOCHU CHEMICALS AMERICA INC. (HEAD OFFICE )	360 HAMILTON AVENUE, 6TH FLOOR		WHITE PLAINS, NEW YORK	WESTCHESTER COUNTY	NY	10601-1811	17-514-4989	100602192	110036000000	424690 Other Chemical And Allied Products Merchant Wholesalers	Import					Import	0	119725	119725	343993	243936	368561	<1,000,000	500,000 ‚Äì <1,000,000	1,000,000 ‚Äì <20,000,000	1,000,000 ‚Äì <10,000,000
1,2-Benzenedicarboxylic acid, 1,2-dibutyl ester	26.7133	-80.0516	714922	84-74-2	84742	CASRN	GREENCHEM INDUSTRIES LLC	222 CLEMATIS STREET	Suite 207	WEST PALM BEACH	Palm Beach	FL	33401	80-577-2717									GREENCHEM	222 CLEMATIS ST	SUITE 207	WEST PALM BEACH	PALM BEACH COUNTY	FL	33401	80-577-2717	TSCA124127	110070000000	424690 Other Chemical And Allied Products Merchant Wholesalers						Import	CBI	CBI	CBI	CBI	CBI	CBI	1,000,000 ‚Äì <10,000,000	1,000,000 ‚Äì <10,000,000	1,000,000 ‚Äì <10,000,000	1,000,000 ‚Äì <10,000,000
1,2-Benzenedicarboxylic acid, 1,2-dibutyl ester	29.6535	-82.4068	700676	84-74-2	84742	CASRN	ALLCHEM INDUSTRIES HOLDING CORP	6010 NW FIRST PLACE		GAINESVILLE	Alachua	FL	32607	05-945-5423									ALLCHEM INDUSTRIES INDUSTRIAL CHEMICALS GROUP, INC	6010 NW 1ST PL		GAINESVILLE	ALACHUA COUNTY	FL	32607	11-120-7127	TSCA110582	110069000000	424690 Other Chemical And Allied Products Merchant Wholesalers	Import									308644	396828	396828	1,000,000 ‚Äì <10,000,000	1,000,000 ‚Äì <10,000,000	1,000,000 ‚Äì <10,000,000	1,000,000 ‚Äì <10,000,000
1,2-Benzenedicarboxylic acid, 1,2-dibutyl ester	30.1546	-95.4631	737037	84-74-2	84742	CASRN	SHRIEVE CHEMICAL COMPANY, LLC	1755 WOODSTEAD COURT		THE WOODLANDS	Montgomery	TX	77380	09-397-2602									SHRIEVE CHEMICAL COMPANY, LLC	1755 WOODSTEAD CT		SPRING	MONTGOMERY COUNTY	TX	77380	09-397-2602	TSCA10051072	110071000000	325998 All Other Miscellaneous Chemical Product And Preparation Manufacturing	Withheld	424690 Other Chemical And Allied Products Merchant Wholesalers	Withheld			CBI	CBI	CBI	CBI	CBI	CBI	CBI	1,000,000 ‚Äì <10,000,000	1,000,000 ‚Äì <10,000,000	1,000,000 ‚Äì <10,000,000	1,000,000 ‚Äì <10,000,000
1,2-Benzenedicarboxylic acid, 1,2-dibutyl ester	30.1604	-95.4559	701561	84-74-2	84742	CASRN	HUNTSMAN INTERNATIONAL LLC	10003 Woodloch Forest Dr		THE WOODLANDS	Montgomery	TX	77380	96-864-2079									HUNTSMAN CORPORATION - THE WOODLANDS CORPORATE SITE	10003 WOODLOCH FOREST DR.		THE WOODLANDS	MONTGOMERY	TX	77380	96-864-2079	100606419	110036000000	325199 All Other Basic Organic Chemical Manufacturing	Import					Import	CBI	CBI	CBI	CBI	CBI	CBI	1,000,000 ‚Äì <10,000,000	1,000,000 ‚Äì <10,000,000	1,000,000 ‚Äì <10,000,000	1,000,000 ‚Äì <10,000,000
1,2-Benzenedicarboxylic acid, 1,2-dibutyl ester	33.4146	-86.8032	729768	84-74-2	84742	CASRN	INDUSTRIAL CHEMICALS INC.	2042 MONTREAT DRIVE		BIRMINGHAM	JEFFERSON	AL	35216	05-097-8329									INDUSTRIAL CHEMICALS INC	2042 MONTREAT DRIVE		VESTAVIA HILLS	JEFFERSON COUNTY	AL	35216	05-097-8329	TSCA4338	110016000000	424690 Other Chemical And Allied Products Merchant Wholesalers	Import					Import	0	422757	422757	616634	614561	663040	1,000,000 ‚Äì <10,000,000	1,000,000 ‚Äì <10,000,000	1,000,000 ‚Äì <10,000,000	1,000,000 ‚Äì <10,000,000
1,2-Benzenedicarboxylic acid, 1,2-dibutyl ester	35.8756	-78.6796	706784	84-74-2	84742	CASRN	COVALENT CHEMICAL	6501 CREEDMOOR DR. SUITE 207		RALEIGH	Wake	NC	27613	09-021-2439									COVALENT CHEMICAL	6501 CREEDMOOR RD		RALEIGH	WAKE COUNTY	NC	27613	09-021-2439	TSCA10059922	110071000000	424690 Other Chemical And Allied Products Merchant Wholesalers	Both					Import	0	88184	88184	0	88184	0	1,000,000 ‚Äì <10,000,000	1,000,000 ‚Äì <10,000,000	1,000,000 ‚Äì <10,000,000	1,000,000 ‚Äì <10,000,000
1,2-Benzenedicarboxylic acid, 1,2-dibutyl ester	36.3209	-79.6491	717862	84-74-2	84742	CASRN	DYSTAR LP	209 WATLINGTON INDUSTRIAL DRIVE		REIDSVILLE	Rockingham County	NC	27320	96-726-9908									DYSTAR LP	209 WATLINGTON INDUSTRIAL DRIVE		REIDSVILLE		NC	27320	96-726-9908	TSCA6855	110010000000	424690 Other Chemical And Allied Products Merchant Wholesalers	Manufacture					Manufacture	51852	0	51852	25030	25021	0	1,000,000 ‚Äì <10,000,000	1,000,000 ‚Äì <10,000,000	1,000,000 ‚Äì <10,000,000	1,000,000 ‚Äì <10,000,000
1,2-Benzenedicarboxylic acid, 1,2-dibutyl ester	37.1696	-80.5384	728762	84-74-2	84742	CASRN	BAE Systems, Ordnance Systems Inc.	Radford Army Ammunition Plant	PO Box 1	RADFORD	Montgomery County	VA	24143	04-947-8725									BAE SYSTEMS	4050 PEPPERS FERRY ROAD		RADFORD		VA	24141	07-837-5499	TSCA128365	110067000000	325920 Explosives Manufacturing	Both									24251	55125	11025	1,000,000 ‚Äì <10,000,000	1,000,000 ‚Äì <10,000,000	1,000,000 ‚Äì <10,000,000	1,000,000 ‚Äì <10,000,000
1,2-Benzenedicarboxylic acid, 1,2-dibutyl ester	39.7942	-75.3967	727424	84-74-2	84742	CASRN	Valtris	7500 East Pleasant Valley		Independence	cuyahoga	OH	44131	07-979-5537									POLYMER ADDITIVES, INC.	170 ROUTE 130 SOUTH		BRIDGEPORT	GLOUCESTER COUNTY	NJ	8014	07-971-0078	TSCA95283	110001000000	325199 All Other Basic Organic Chemical Manufacturing	Both					Manufacture	CBI	CBI	CBI	CBI	CBI	CBI	1,000,000 ‚Äì <10,000,000	1,000,000 ‚Äì <10,000,000	1,000,000 ‚Äì <10,000,000	1,000,000 ‚Äì <10,000,000
1,2-Benzenedicarboxylic acid, 1,2-dibutyl ester	40.4575	-80.1933	707204	84-74-2	84742	CASRN	LANXESS CORPORATION	111 RIDC PARK WEST DRIVE		PITTSBURGH	Allegheny	PA	15275	14-585-8770	LANXESS DEUTSCHLAND GMBH	Kennedyplatz 1		Koln		50569	GM	31-546-4482	LANXESS CORPORATION---PITTSBURGH	111 RIDC PARK WEST DR		PITTSBURGH	ALLEGHENY COUNTY	PA	15275-1112	14-585-8770	100606790	110024000000	325130 Synthetic Dye And Pigment Manufacturing	Import	325199 All Other Basic Organic Chemical Manufacturing	Import				0	0	0	0	75649	6419	1,000,000 ‚Äì <10,000,000	1,000,000 ‚Äì <10,000,000	1,000,000 ‚Äì <10,000,000	1,000,000 ‚Äì <10,000,000
1,2-Benzenedicarboxylic acid, 1,2-dibutyl ester	40.7285	-74.1211	726296	84-74-2	84742	CASRN	G.J. CHEMICAL CO., INC.	40 VERONICA AVENUE		SOMERSET	Somerset	NJ	8873	07-824-5503									GJ CHEMICAL CO INC	128 DOREMUS AVENUE		NEWARK	ESSEX COUNTY	NJ	07105-4838	83-792-0909	100600139	110014000000	424690 Other Chemical And Allied Products Merchant Wholesalers						Import	0	139618	139618	148349	139509	134982	1,000,000 ‚Äì <10,000,000	1,000,000 ‚Äì <10,000,000	1,000,000 ‚Äì <10,000,000	1,000,000 ‚Äì <10,000,000
1,2-Benzenedicarboxylic acid, 1,2-dibutyl ester	40.8047	-74.109	726107	84-74-2	84742	CASRN	SIKA CORPORATION	201 POLITO AVENUE		LYNDHURST	Bergen	NJ	7071	00-217-9893	SIKA AG	Zugerstrasse 50		Baar		6340	SZ	48-000-0538	SIKA CORP	201 POLITO AVE		LYNDHURST		NJ	7071	00-217-9893	200003869	110019000000	325520 Adhesive Manufacturing	Import									CBI	CBI	CBI	1,000,000 ‚Äì <10,000,000	1,000,000 ‚Äì <10,000,000	1,000,000 ‚Äì <10,000,000	1,000,000 ‚Äì <10,000,000
1,2-Benzenedicarboxylic acid, 1,2-dibutyl ester	40.8606	-74.1667	728993	84-74-2	84742	CASRN	CBI	CBI	CBI	CBI	CBI	CBI	CBI	CBI	CBI	CBI	CBI	CBI	CBI	CBI	CBI	CBI	MAK CHEMICALS	1114 CLIFTON AVE		CLIFTON	PASSAIC COUNTY	NJ	7013	07-865-5980	TSCA10050762	110071000000	424690 Other Chemical And Allied Products Merchant Wholesalers	Import					Import	0	105884	105884	143016	247267	249616	1,000,000 ‚Äì <10,000,000	1,000,000 ‚Äì <10,000,000	1,000,000 ‚Äì <10,000,000	1,000,000 ‚Äì <10,000,000
1,2-Benzenedicarboxylic acid, 1,2-dibutyl ester	41.4981	-81.6915	725751	84-74-2	84742	CASRN	The Sherwin Williams Company	101 Prospect Ave NW		Cleveland	Cuyahoga	OH	44115	00-420-6397									THE SHERWIN-WILLIAMS COMPANY	101 PROSPECT AVE. NW		CLEVELAND	CUYAHOGA COUNTY	OH	44115-1075	00-420-6397	200003830	110005000000	325510 Paint And Coating Manufacturing	Both	444120 Paint And Wallpaper Stores	Import			Import	CBI	CBI	CBI	CBI	CBI	CBI	1,000,000 ‚Äì <10,000,000	1,000,000 ‚Äì <10,000,000	1,000,000 ‚Äì <10,000,000	1,000,000 ‚Äì <10,000,000
1,2-Benzenedicarboxylic acid, 1,2-dibutyl ester	47.6728	-122.107	738887	84-74-2	84742	CASRN	UNIVAR SOLUTIONS INC.	3075 Highland Pkwy., Ste. 200		Downers Grove	DuPage	IL	60515-5560	09-887-7053									UNIVAR SOLUTIONS USA INC	17411 NE UNION HILL RD.		REDMOND	KING COUNTY	WA	98052	10-297-1785	TSCA119921	110069000000	424690 Other Chemical And Allied Products Merchant Wholesalers	Import						0	0	0	0	0	44092	1,000,000 ‚Äì <10,000,000	1,000,000 ‚Äì <10,000,000	1,000,000 ‚Äì <10,000,000	1,000,000 ‚Äì <10,000,000
1,2-Benzenedicarboxylic acid, 1,2-dicyclohexyl ester	29.6089	-95.0534	704156	84-61-7	84617	CASRN	UNITED INITIATORS, INC.	555 GARDEN STREET		ELYRIA	Lorain	OH	44035	80-989-0924	UNITED INITIATORS GMBH	Dr.-Gustav-Adolph-Str. 3		Pullach		82049	GM	80-989-0924	UNITED INITIATORS, INC.	555 GARDEN STREET		ELYRIA	LORAIN	OH	44035	80-989-0924	TSCA79684	110064000000	325199 All Other Basic Organic Chemical Manufacturing	Both					Import	CBI	CBI	CBI	CBI	CBI	CBI	500,000 ‚Äì <1,000,000	<1,000,000	500,000 ‚Äì <1,000,000	500,000 ‚Äì <1,000,000
1,2-Benzenedicarboxylic acid, 1,2-dicyclohexyl ester	36.0402	-79.7786	717476	84-61-7	84617	CASRN	LANXESS CORPORATION	111 RIDC PARK WEST DRIVE		PITTSBURGH	Allegheny	PA	15275	14-585-8770	LANXESS DEUTSCHLAND GMBH	Kennedyplatz 1		Koln		50569	GM	31-546-4482	LANXESS CORPORATION GREENSBORO	520 BROOME RD.		GREENSBORO	GUILFORD COUNTY	NC	27406-3799	06-179-5696	100608461	110000000000	325199 All Other Basic Organic Chemical Manufacturing	Manufacture					Manufacture	17290	0	17290	55124	250656	440954	500,000 ‚Äì <1,000,000	<1,000,000	500,000 ‚Äì <1,000,000	500,000 ‚Äì <1,000,000
1,2-Benzenedicarboxylic acid, 1,2-dicyclohexyl ester	36.0599	-79.8285	718214	84-61-7	84617	CASRN	VERTELLUS LLC	201 NORTH ILLINOIS STREET	Suite 1800	INDIANAPOLIS	Marion	IN	46204	07-934-5010									VERTELLUS GREENSBORO LLC	2110 HIGH POINT RD.		GREENSBORO	GUILFORD COUNTY	NC	27403	08-048-4759	TSCA9666	110000000000	325199 All Other Basic Organic Chemical Manufacturing	Both					Manufacture	CBI	CBI	CBI	CBI	CBI	CBI	500,000 ‚Äì <1,000,000	<1,000,000	500,000 ‚Äì <1,000,000	500,000 ‚Äì <1,000,000
1,2-Benzenedicarboxylic acid, 1,2-dicyclohexyl ester	41.8798	-87.6294	737179	84-61-7	84617	CASRN	Nouryon Chemicals LLC	131 S DEARBORN SUITE 1000	Suite 1600	CHICAGO	Cook	IL	60603	11-713-4378									NOURYON FUNCTIONAL CHEMICALS LLC	131 S DEARBORN ST	SUITE 1000	CHICAGO	COOK COUNTY	IL	60603	11-713-4378	TSCA10044282	110071000000	325199 All Other Basic Organic Chemical Manufacturing	Both					Import	CBI	CBI	CBI	CBI	CBI	CBI	500,000 ‚Äì <1,000,000	<1,000,000	500,000 ‚Äì <1,000,000	500,000 ‚Äì <1,000,000
1,2-Benzenedicarboxylic acid, 1,2-diethyl ester	30.1546	-95.4631	737036	84-66-2	84662	CASRN	SHRIEVE CHEMICAL COMPANY, LLC	1755 WOODSTEAD COURT		THE WOODLANDS	Montgomery	TX	77380	09-397-2602									SHRIEVE CHEMICAL COMPANY, LLC	1755 WOODSTEAD CT		SPRING	MONTGOMERY COUNTY	TX	77380	09-397-2602	TSCA10051072	110071000000	325998 All Other Miscellaneous Chemical Product And Preparation Manufacturing	Both	424690 Other Chemical And Allied Products Merchant Wholesalers	Both				0	0	0	CBI	CBI	CBI	1,000,000 ‚Äì <10,000,000	1,000,000 ‚Äì <10,000,000	1,000,000 ‚Äì <10,000,000	1,000,000 ‚Äì <10,000,000
1,2-Benzenedicarboxylic acid, 1,2-diethyl ester	36.5359	-82.5493	722511	84-66-2	84662	CASRN	EASTMAN CHEMICAL COMPANY, INC	200 SOUTH WILCOX DRIVE		KINGSPORT	Sullivan	TN	37660-5147	80-889-8381									EASTMAN CHEMICAL CO. B-280 OFF	200 SOUTH WILCOX DRIVE		KINGSPORT	SULLIVAN	TN	37660-5147	80-889-8381	TSCA4101	110057000000	325998 All Other Miscellaneous Chemical Product And Preparation Manufacturing	Withheld					CBI	CBI	CBI	CBI	CBI	CBI	CBI	1,000,000 ‚Äì <10,000,000	1,000,000 ‚Äì <10,000,000	1,000,000 ‚Äì <10,000,000	1,000,000 ‚Äì <10,000,000
1,2-Benzenedicarboxylic acid, 1,2-diethyl ester	39.8199	-75.2164	719711	84-66-2	84662	CASRN	COIM USA IN.	286 MANTUA GROVE ROAD BLD # 1		WEST DEPTFORD	Gloucester	NJ	08066-1738	10-247-2029									COIM USA INC	286 MANTUA GROVE ROAD		WEST DEPTFORD	GLOUCESTER	NJ	08066-1738	10-247-2029	TSCA8405	110000000000	325520 Adhesive Manufacturing	Manufacture					Import	0	60873	60873	42284	41490	86680	1,000,000 ‚Äì <10,000,000	1,000,000 ‚Äì <10,000,000	1,000,000 ‚Äì <10,000,000	1,000,000 ‚Äì <10,000,000
1,2-Benzenedicarboxylic acid, 1,2-diethyl ester	40.436	-74.1579	731897	84-66-2	84662	CASRN	INTERNATIONAL FLAVORS AND FRAGRANCES INC.	521-WEST 57TH STREET		NEW YORK	NEW YORK	NY	10019-2929	00-153-4833									INTERNATIONAL FLAVORS & FRAGRANCES INC.	600 HWY 36		HAZLET	MONMOUTH COUNTY	NJ	7730	05-593-6587	TSCA82690	110059000000	325620 Toilet Preparation Manufacturing	Both					Import	CBI	CBI	CBI	CBI	CBI	CBI	1,000,000 ‚Äì <10,000,000	1,000,000 ‚Äì <10,000,000	1,000,000 ‚Äì <10,000,000	1,000,000 ‚Äì <10,000,000
1,2-Benzenedicarboxylic acid, 1,2-diethyl ester	40.6418	-74.2199	730788	84-66-2	84662	CASRN	The Rotuba Extruders, Inc	1301 S Park Avenue		Linden	Union	NJ	7036	00-121-2141									THE ROTUBA EXTRUDERS, INC.	1301 S PARK AVE		LINDEN	UNION COUNTY	NJ	7036	00-121-2141	TSCA10053012	110071000000	325991 Custom Compounding Of Purchased Resins	Manufacture					Import	0	1191133	1191133	1389818	1531532	1758428	1,000,000 ‚Äì <10,000,000	1,000,000 ‚Äì <10,000,000	1,000,000 ‚Äì <10,000,000	1,000,000 ‚Äì <10,000,000
1,2-Benzenedicarboxylic acid, 1,2-diethyl ester	40.7285	-74.1211	726295	84-66-2	84662	CASRN	G.J. CHEMICAL CO., INC.	40 VERONICA AVENUE		SOMERSET	Somerset	NJ	8873	07-824-5503									GJ CHEMICAL CO INC	128 DOREMUS AVENUE		NEWARK	ESSEX COUNTY	NJ	07105-4838	83-792-0909	100600139	110014000000	424690 Other Chemical And Allied Products Merchant Wholesalers						Import	0	52845	52845	78597	57871	21164	1,000,000 ‚Äì <10,000,000	1,000,000 ‚Äì <10,000,000	1,000,000 ‚Äì <10,000,000	1,000,000 ‚Äì <10,000,000
1,2-Benzenedicarboxylic acid, 1,2-diethyl ester	40.907	-74.7312	717234	84-66-2	84662	CASRN	GIVAUDAN FRAGRANCES CORP.	717 RIDGEDALE AVE		EAST HANOVER	USA	NJ	7936	80-840-3930									GIVAUDAN FRAGRANCES CORP.	300 WATERLOO VALLEY ROAD		MOUNT OLIVE		NJ	7828	80-840-3930	200003048	110007000000	493110 General Warehousing And Storage	Both					Import	CBI	CBI	CBI	CBI	CBI	CBI	1,000,000 ‚Äì <10,000,000	1,000,000 ‚Äì <10,000,000	1,000,000 ‚Äì <10,000,000	1,000,000 ‚Äì <10,000,000
1,2-Benzenedicarboxylic acid, 1,2-diethyl ester	41.0977	-73.4166	715727	84-66-2	84662	CASRN	CHARKIT CHEMICAL CORPORATION	32 HAVILAND STREET		SOUTH NORWALK	Fairfield	CT	6854	03-038-7427									CHARKIT CHEMICAL COMPANY LLC	32 HAVILAND STREET		NORWALK	FAIRFIELD COUNTY	CT	6854	03-038-7427	100605177	110057000000	424690 Other Chemical And Allied Products Merchant Wholesalers	Import					Import	0	704171	704171	729634	718986	478244	1,000,000 ‚Äì <10,000,000	1,000,000 ‚Äì <10,000,000	1,000,000 ‚Äì <10,000,000	1,000,000 ‚Äì <10,000,000
1,2-Benzenedicarboxylic acid, 1,2-diethyl ester	45.0331	-93.0942	708824	84-66-2	84662	CASRN	3M COMPANY	3M CENTER, BUILDING 220-6E-03		ST. PAUL	Ramsey	MN	55144	00-617-3082									3M COMPANY	3M CENTER		ST PAUL	RAMSEY	MN	55144-1000	00-617-3082	100604318	110036000000	322220 Paper Bag And Coated And Treated Paper Manufacturing	Import	326113 Unlaminated Plastics Film And Sheet (Except Packaging) Manufacturing	Import	325520 Adhesive Manufacturing	Import	Import	CBI	CBI	CBI	CBI	CBI	CBI	1,000,000 ‚Äì <10,000,000	1,000,000 ‚Äì <10,000,000	1,000,000 ‚Äì <10,000,000	1,000,000 ‚Äì <10,000,000
1,2-Benzenedicarboxylic acid, 1,2-diisodecyl ester	33.85	-84.3755	730276	26761-40-0	26761400	CASRN	LG CHEM AMERICA, INC.	3475 PIEDMONT ROAD NE, SUITE 1200		ATLANTA	Fulton	GA	30305	19-465-5882	LG CHEM LTD	128, Yeoui-daero, Yeongdeungpo-gu		Seoul		7336	KS	69-512-8893	LG CHEM AMERICA, INC.	3475 PIEDMONT RD NE		ATLANTA	FULTON COUNTY	GA	30305	19-465-5882	TSCA99702	110067000000	424690 Other Chemical And Allied Products Merchant Wholesalers						Import	CBI	CBI	CBI	CBI	CBI	CBI	<1,000,000	100,000 ‚Äì <500,000	100,000 ‚Äì <500,000	100,000 ‚Äì <500,000
1,2-Benzenedicarboxylic acid, 1,2-diisodecyl ester	34.4251	-84.9227	712915	26761-40-0	26761400	CASRN	LG HAUSY AMERICA, INC.	310 LG DRIVE		ADAIRSVILLE	BARTOW	GA	30103	14-912-0367									LG HAUSYS AMERICA INC	310 LG DR SE		ADAIRSVILLE	BARTOW	GA	30103	14-912-0367	TSCA124002	110023000000	325211 Plastics Material And Resin Manufacturing	Import					Import	0	26223	26223	15774	6880	2123	<1,000,000	100,000 ‚Äì <500,000	100,000 ‚Äì <500,000	100,000 ‚Äì <500,000
1,2-Benzenedicarboxylic acid, 1,2-diisodecyl ester	40.7625	-73.9743	702949	26761-40-0	26761400	CASRN	ICC Industries Inc.	725 Fifth Avenue	14th Floor	New York	New York	NY	10022	04-617-7341									ICC CHEMICAL CORP	725 5TH AVE		NEW YORK	NEW YORK COUNTY	NY	10022	19-281-3111	TSCA10058156	110071000000	424690 Other Chemical And Allied Products Merchant Wholesalers	Import									CBI	CBI	CBI	<1,000,000	100,000 ‚Äì <500,000	100,000 ‚Äì <500,000	100,000 ‚Äì <500,000
1,2-Benzenedicarboxylic acid, 1,2-diisodecyl ester	40.9655	-81.4686	736292	26761-40-0	26761400	CASRN	ChemSpec, Ltd.	1559 Corporate Woods Parkway	Suite 150	Uniontown	Summit County	OH	44685	13-922-0284	SAFIC ALCAN	13 Cours Valmy	92977 Paris La Dfense Cedex	Paris			FR	13-922-0284	CHEMSPEC, LTD.	1559 CORPORATE WOODS PKWY	SUITE 150	UNIONTOWN	SUMMIT COUNTY	OH	44685	13-922-0284	TSCA115201	110069000000	424690 Other Chemical And Allied Products Merchant Wholesalers	Import					Import	0	52472	52472	57720	136279	74670	<1,000,000	100,000 ‚Äì <500,000	100,000 ‚Äì <500,000	100,000 ‚Äì <500,000
1,2-Benzenedicarboxylic acid, 1,2-diisodecyl ester	41.0611	-81.4725	717635	26761-40-0	26761400	CASRN	HARWICK STANDARD DISTRIBUTION CORPORATION	60 S. SEIBERLING STREET		AKRON	SUMMIT	OH	44305	05-724-7793									HARWICK STANDARD DISTRIBUTION CORP	60 S. SEIBERLING ST.		AKRON	SUMMIT COUNTY	OH	44305	05-724-7793	100603283	110000000000	424690 Other Chemical And Allied Products Merchant Wholesalers	Import					Import	0	42873	42873	128228	86882	0	<1,000,000	100,000 ‚Äì <500,000	100,000 ‚Äì <500,000	100,000 ‚Äì <500,000
1,2-Benzenedicarboxylic acid, 1,2-diisodecyl ester	41.183	-81.4713	735789	26761-40-0	26761400	CASRN	Akrochem Corporation	3770 Embassy Parkway		Akron	Summit	OH	44333	03-999-8992									AKROCHEM CORP	4239 HUDSON DR.		STOW	SUMMIT	OH	44224	03-999-8992	TSCA6296	110000000000	424690 Other Chemical And Allied Products Merchant Wholesalers	Import					Import	0	14585	14585	29169	0	0	<1,000,000	100,000 ‚Äì <500,000	100,000 ‚Äì <500,000	100,000 ‚Äì <500,000
1,2-Benzenedicarboxylic acid, 1,2-diisodecyl ester	41.458	-81.5164	730776	26761-40-0	26761400	CASRN	CBI	CBI	CBI	CBI	CBI	CBI	CBI	CBI	CBI	CBI	CBI	CBI	CBI	CBI	CBI	CBI	TREMCO INCORPORATED	3735 GREEN ROAD		BEACHWOOD	CUYAHOGA COUNTY	OH	44122	00-418-8702	TSCA122704	110013000000	325510 Paint And Coating Manufacturing	Import	325520 Adhesive Manufacturing	Import			Import	0	800201	800201	199228	176620	212552	<1,000,000	100,000 ‚Äì <500,000	100,000 ‚Äì <500,000	100,000 ‚Äì <500,000
1,2-Benzenedicarboxylic acid, 1,2-diisodecyl ester	45.0331	-93.0942	708765	26761-40-0	26761400	CASRN	3M COMPANY	3M CENTER, BUILDING 220-6E-03		ST. PAUL	Ramsey	MN	55144	00-617-3082									3M COMPANY	3M CENTER		ST PAUL	RAMSEY	MN	55144-1000	00-617-3082	100604318	110036000000	322220 Paper Bag And Coated And Treated Paper Manufacturing	Import	326113 Unlaminated Plastics Film And Sheet (Except Packaging) Manufacturing	Import	325520 Adhesive Manufacturing	Import	Import	CBI	CBI	CBI	CBI	CBI	CBI	<1,000,000	100,000 ‚Äì <500,000	100,000 ‚Äì <500,000	100,000 ‚Äì <500,000
1,2-Benzenedicarboxylic acid, 1,2-diisononyl ester	26.7133	-80.0516	714884	28553-12-0	28553120	CASRN	GREENCHEM INDUSTRIES LLC	222 CLEMATIS STREET	Suite 207	WEST PALM BEACH	Palm Beach	FL	33401	80-577-2717									GREENCHEM	222 CLEMATIS ST	SUITE 207	WEST PALM BEACH	PALM BEACH COUNTY	FL	33401	80-577-2717	TSCA124127	110070000000	424690 Other Chemical And Allied Products Merchant Wholesalers						Import	CBI	CBI	CBI	CBI	CBI	CBI	50,000,000 ‚Äì <100,000,000	100,000,000 ‚Äì <250,000,000	100,000,000 ‚Äì <250,000,000	100,000,000 ‚Äì <250,000,000
1,2-Benzenedicarboxylic acid, 1,2-diisononyl ester	29.7459	-95.4577	719883	28553-12-0	28553120	CASRN	Tribute Energy, Inc.	2100 W. Loop South	Suite 1500	Houston	Harris	TX	77027	80-823-8484									TRIBUTE ENERGY, INC.	2100 WEST LOOP S	SUITE 1500	HOUSTON	HARRIS COUNTY	TX	77027	80-823-8484	TSCA10079939	110071000000	424690 Other Chemical And Allied Products Merchant Wholesalers	Import					Import	0	837756	837756	1102311	1587995	1499099	50,000,000 ‚Äì <100,000,000	100,000,000 ‚Äì <250,000,000	100,000,000 ‚Äì <250,000,000	100,000,000 ‚Äì <250,000,000
1,2-Benzenedicarboxylic acid, 1,2-diisononyl ester	32.0961	-81.1235	706845	28553-12-0	28553120	CASRN	COLONIAL GROUP, INC.	PO BOX 576	101 North Lathrop Ave	SAVANNAH	Chatham	GA	31402	80-837-6735									COLONIAL CHEMICAL SOLUTIONS INC	916 W LATHROP		SAVANNAH		GA	31402	11-004-2897	TSCA7061	110019000000	424690 Other Chemical And Allied Products Merchant Wholesalers	Import						0	0	0	0	0	132276	50,000,000 ‚Äì <100,000,000	100,000,000 ‚Äì <250,000,000	100,000,000 ‚Äì <250,000,000	100,000,000 ‚Äì <250,000,000
1,2-Benzenedicarboxylic acid, 1,2-diisononyl ester	33.1859	-87.2608	708418	28553-12-0	28553120	CASRN	MERCEDES BENZ U.S	1 MERCEDES DRIVE		VANCE	Tuscaloosa	AL	35490	82-483-9872	DAIMLER AG	Mercedesstr. 120		Stuttgart		70372	GM	82-483-9872	MERCEDES-BENZ US INTERNATIONAL INC	1 MERCEDES DRIVE		VANCE	TUSCALOOSA	AL	35490-2900	82-483-9872	TSCA98604	110000000000	336111 Automobile Manufacturing	Import					Import	0	310000	310000	190000	64000	430000	50,000,000 ‚Äì <100,000,000	100,000,000 ‚Äì <250,000,000	100,000,000 ‚Äì <250,000,000	100,000,000 ‚Äì <250,000,000
1,2-Benzenedicarboxylic acid, 1,2-diisononyl ester	33.4146	-86.8032	729758	28553-12-0	28553120	CASRN	INDUSTRIAL CHEMICALS INC.	2042 MONTREAT DRIVE		BIRMINGHAM	JEFFERSON	AL	35216	05-097-8329									INDUSTRIAL CHEMICALS INC	2042 MONTREAT DRIVE		VESTAVIA HILLS	JEFFERSON COUNTY	AL	35216	05-097-8329	TSCA4338	110016000000	424690 Other Chemical And Allied Products Merchant Wholesalers	Import									37478	0	0	50,000,000 ‚Äì <100,000,000	100,000,000 ‚Äì <250,000,000	100,000,000 ‚Äì <250,000,000	100,000,000 ‚Äì <250,000,000
1,2-Benzenedicarboxylic acid, 1,2-diisononyl ester	35.9485	-78.1169	705404	28553-12-0	28553120	CASRN	Right Lane Industries, LLC	222 N. LaSalle St.		Chicago	Cook	IL	60601	08-103-0931									BELT CONCEPTS OF AMERICA INC	605 N. PINE ST.		SPRING HOPE	NASH	NC	27882	17-540-6842	TSCA8092	110000000000	326220 Rubber And Plastics Hoses And Belting Manufacturing						Import	0	660840	660840	705420	1014184	1305000	50,000,000 ‚Äì <100,000,000	100,000,000 ‚Äì <250,000,000	100,000,000 ‚Äì <250,000,000	100,000,000 ‚Äì <250,000,000
1,2-Benzenedicarboxylic acid, 1,2-diisononyl ester	37.3773	-121.92	705756	28553-12-0	28553120	CASRN	Showa Denko Materials (America), Inc.	2150 N. 1st Street	STE 350	San Jose	Santa Clara	CA	95131	13-282-9329	SHOWA DENKO MATERIALS CO LTD	GranTokyo South Tower 9-2	Marunouchi, 1-chome	Chiyoda-ku		100-6605	JA	69-053-5794	SHOWA DENKO MATERIALS (AMERICA), INC.	2150 N 1ST ST	STE. 350	SAN JOSE	SANTA CLARA COUNTY	CA	95131	13-282-9329	TSCA10057511	110071000000	423610 Electrical Apparatus And Equipment, Wiring Supplies, And Related Equipment Merchant Wholesalers	Import					Import	CBI	CBI	CBI	CBI	CBI	CBI	50,000,000 ‚Äì <100,000,000	100,000,000 ‚Äì <250,000,000	100,000,000 ‚Äì <250,000,000	100,000,000 ‚Äì <250,000,000
1,2-Benzenedicarboxylic acid, 1,2-diisononyl ester	37.7932	-122.4	729271	28553-12-0	28553120	CASRN	Wilbur-Ellis Company LLC	345 California Street	27th Floor	San Francisco	San Francisco	CA	94104	00-691-2075									CONNELL BROS. CO. LLC	345 CALIFORNIA ST	FLOOR 27	SAN FRANCISCO	SAN FRANCISCO COUNTY	CA	94104	00-691-3479	TSCA124303	110070000000	424910 Farm Supplies Merchant Wholesalers	Import						0	0	0	0	35274	35274	50,000,000 ‚Äì <100,000,000	100,000,000 ‚Äì <250,000,000	100,000,000 ‚Äì <250,000,000	100,000,000 ‚Äì <250,000,000
1,2-Benzenedicarboxylic acid, 1,2-diisononyl ester	38.1653	-85.8786	705547	28553-12-0	28553120	CASRN	HENKEL CORPORATION	1 HENKEL WAY		ROCKY HILL	Hartford	CT	6067	08-088-7708									HENKEL LOUISVILLE	7101 LOGISTICS DR		LOUISVILLE	JEFFERSON COUNTY	KY	40258	80-519-1566	TSCA121963	110069000000	325520 Adhesive Manufacturing	Import					Import	0	24668	24668	10734	25760	17859	50,000,000 ‚Äì <100,000,000	100,000,000 ‚Äì <250,000,000	100,000,000 ‚Äì <250,000,000	100,000,000 ‚Äì <250,000,000
1,2-Benzenedicarboxylic acid, 1,2-diisononyl ester	38.222	-85.8298	702115	28553-12-0	28553120	CASRN	GEON Performance Solutions LLC	25777 Detroit Road, Suite 202		Westlake	Cuyahoga	OH	44145	11-724-7947	SK ECHO HOLDINGS S R L	6 rue Eugne Ruppert		Luxembourg		L 2453	LU	37-176-4800	GEON PERFORMANCE SOLUTIONS LLC	4250 BELLS LN		LOUISVILLE	JEFFERSON COUNTY	KY	40211	80-104-0098	TSCA6525	110040000000	325211 Plastics Material And Resin Manufacturing	Both					Import	0	839400	839400	0	709600	616200	50,000,000 ‚Äì <100,000,000	100,000,000 ‚Äì <250,000,000	100,000,000 ‚Äì <250,000,000	100,000,000 ‚Äì <250,000,000
1,2-Benzenedicarboxylic acid, 1,2-diisononyl ester	39.7861	-86.1617	721767	28553-12-0	28553120	CASRN	SUPERIOR OIL COMPANY, INC	1402 NORTH CAPITOL AVENUE, SUITE 100		INDIANAPOLIS	Marion	IN	46202	03-999-4975									SUPERIOR OIL COMPANY, INC.	1402 N CAPITOL AVE	SUITE 100	INDIANAPOLIS	MARION COUNTY	IN	46202	03-999-4975	TSCA109001	110057000000	424690 Other Chemical And Allied Products Merchant Wholesalers						Import	CBI	CBI	CBI	CBI	CBI	CBI	50,000,000 ‚Äì <100,000,000	100,000,000 ‚Äì <250,000,000	100,000,000 ‚Äì <250,000,000	100,000,000 ‚Äì <250,000,000
1,2-Benzenedicarboxylic acid, 1,2-diisononyl ester	40.2033	-75.0835	734126	28553-12-0	28553120	CASRN	Gehring-Montgomery, Inc.	710 Louis Drive		Warminster	Bucks	PA	18974	11-434-1357	TER HELL & CO GMBH	Borsenbrucke 2		Hamburg		20457	GM	11-434-1357	GEHRING MONTGOMERY	710 LOUIS DRIVE		WARMINSTER	BUCKS	PA	18974-2829	11-434-1357	100606008	110000000000	325998 All Other Miscellaneous Chemical Product And Preparation Manufacturing	Both					Manufacture	88607	0	88607	44980	44107	0	50,000,000 ‚Äì <100,000,000	100,000,000 ‚Äì <250,000,000	100,000,000 ‚Äì <250,000,000	100,000,000 ‚Äì <250,000,000
1,2-Benzenedicarboxylic acid, 1,2-diisononyl ester	40.7486	-73.9855	705265	28553-12-0	28553120	CASRN	ALAC International Inc	350 Fifth Avenue	Suite 3015	New York	New York	NY	10118	36-282-4687									ALAC INTERNATIONAL INC.	350 5TH AVE		NEW YORK	NEW YORK COUNTY	NY	10118	36-282-4687	TSCA10050149	110071000000	424610 Plastics Materials And Basic Forms And Shapes Merchant Wholesalers	Import					Import	0	25021453	25021453	28004412	38008448	40917000	50,000,000 ‚Äì <100,000,000	100,000,000 ‚Äì <250,000,000	100,000,000 ‚Äì <250,000,000	100,000,000 ‚Äì <250,000,000
1,2-Benzenedicarboxylic acid, 1,2-diisononyl ester	40.7625	-73.9743	702951	28553-12-0	28553120	CASRN	ICC Industries Inc.	725 Fifth Avenue	14th Floor	New York	New York	NY	10022	04-617-7341									ICC CHEMICAL CORP	725 5TH AVE		NEW YORK	NEW YORK COUNTY	NY	10022	19-281-3111	TSCA10058156	110071000000	424690 Other Chemical And Allied Products Merchant Wholesalers	Import					Import	CBI	CBI	CBI	CBI	CBI	CBI	50,000,000 ‚Äì <100,000,000	100,000,000 ‚Äì <250,000,000	100,000,000 ‚Äì <250,000,000	100,000,000 ‚Äì <250,000,000
1,2-Benzenedicarboxylic acid, 1,2-diisononyl ester	40.7702	-74.3635	717459	28553-12-0	28553120	CASRN	Formosa Plastics Corporation, U.S.A.	9 PEACH TREE HILL ROAD		Livingston	NJ	NJ	7039	03-994-4004									FORMOSA GLOBAL SOLUTIONS, INC.	9 PEACH TREE HILL RD		LIVINGSTON	ESSEX COUNTY	NJ	7039	03-994-4004	200001893	110004000000	325211 Plastics Material And Resin Manufacturing	Import					Import	0	37699	37699	0	1171292	0	50,000,000 ‚Äì <100,000,000	100,000,000 ‚Äì <250,000,000	100,000,000 ‚Äì <250,000,000	100,000,000 ‚Äì <250,000,000
1,2-Benzenedicarboxylic acid, 1,2-diisononyl ester	40.7734	-74.4261	726741	28553-12-0	28553120	CASRN	BASF Corporation	100 Park Avenue		Florham Park	NJ	MI	7932	00-130-7032	BASF SE	Carl-Bosch Strasse 38		Ludwigshafen		60756	GM	31-500-0554	BASF IMPORTS PART 1	100 PARK AVE		FLORHAM PARK	MORRIS COUNTY	NJ	7932	00-130-7032	TSCA130148	110070000000	325199 All Other Basic Organic Chemical Manufacturing	Import					Import	CBI	CBI	CBI	0	0	CBI	50,000,000 ‚Äì <100,000,000	100,000,000 ‚Äì <250,000,000	100,000,000 ‚Äì <250,000,000	100,000,000 ‚Äì <250,000,000
1,2-Benzenedicarboxylic acid, 1,2-diisononyl ester	40.855	-74.4142	701951	28553-12-0	28553120	CASRN	Evonik Corporation	299 Jefferson Rd		Parsippany	Morris	NJ	7054	79-153-3958									EVONIK CORPORATION	299 JEFFERSON ROAD		PARSIPPANY	MORRIS COUNTY	NJ	7054	79-153-3958	100605812	110057000000	325998 All Other Miscellaneous Chemical Product And Preparation Manufacturing	Both					Import	CBI	CBI	CBI	CBI	CBI	CBI	50,000,000 ‚Äì <100,000,000	100,000,000 ‚Äì <250,000,000	100,000,000 ‚Äì <250,000,000	100,000,000 ‚Äì <250,000,000
1,2-Benzenedicarboxylic acid, 1,2-diisononyl ester	40.9655	-81.4686	736294	28553-12-0	28553120	CASRN	ChemSpec, Ltd.	1559 Corporate Woods Parkway	Suite 150	Uniontown	Summit County	OH	44685	13-922-0284	SAFIC ALCAN	13 Cours Valmy	92977 Paris La Dfense Cedex	Paris			FR	13-922-0284	CHEMSPEC, LTD.	1559 CORPORATE WOODS PKWY	SUITE 150	UNIONTOWN	SUMMIT COUNTY	OH	44685	13-922-0284	TSCA115201	110069000000	424690 Other Chemical And Allied Products Merchant Wholesalers	Import					Import	0	111182	111182	1467905	1814111	65962	50,000,000 ‚Äì <100,000,000	100,000,000 ‚Äì <250,000,000	100,000,000 ‚Äì <250,000,000	100,000,000 ‚Äì <250,000,000
1,2-Benzenedicarboxylic acid, 1,2-diisononyl ester	41.0611	-81.4725	717636	28553-12-0	28553120	CASRN	HARWICK STANDARD DISTRIBUTION CORPORATION	60 S. SEIBERLING STREET		AKRON	SUMMIT	OH	44305	05-724-7793									HARWICK STANDARD DISTRIBUTION CORP	60 S. SEIBERLING ST.		AKRON	SUMMIT COUNTY	OH	44305	05-724-7793	100603283	110000000000	424690 Other Chemical And Allied Products Merchant Wholesalers	Import					Import	0	132107	132107	211684	131558	0	50,000,000 ‚Äì <100,000,000	100,000,000 ‚Äì <250,000,000	100,000,000 ‚Äì <250,000,000	100,000,000 ‚Äì <250,000,000
1,2-Benzenedicarboxylic acid, 1,2-diisononyl ester	41.494	-71.3762	726322	28553-12-0	28553120	CASRN	The Chemical Company	44 Southwest Avenue		Jamestown	Newport	RI	2835	15-362-2584									THE CHEMICAL COMPANY	44 SOUTHWEST AVE	PO BOX 436	JAMESTOWN	NEWPORT COUNTY	RI	2835	15-362-2584	TSCA108221	110068000000	424690 Other Chemical And Allied Products Merchant Wholesalers	Import					Import	CBI	CBI	CBI	CBI	CBI	0	50,000,000 ‚Äì <100,000,000	100,000,000 ‚Äì <250,000,000	100,000,000 ‚Äì <250,000,000	100,000,000 ‚Äì <250,000,000
1,2-Benzenedicarboxylic acid, 1,2-diisononyl ester	43.0456	-88.0554	715791	28553-12-0	28553120	CASRN	Arkema Inc.	900 FIRST AVE		King of Prussia	Montgomery	PA	19406	00-229-0773	ARKEMA	420 rue d'Estienne d'Orves		Colombes	Cedex	92705	FR	26-840-1833	BOSTIK INC	11320 WATERTOWN PLANK RD		WAUWATOSA	MILWAUKEE	WI	53226-3413	00-608-3364	100604917	110005000000	325520 Adhesive Manufacturing	Withheld					CBI	CBI	CBI	CBI	CBI	CBI	CBI	50,000,000 ‚Äì <100,000,000	100,000,000 ‚Äì <250,000,000	100,000,000 ‚Äì <250,000,000	100,000,000 ‚Äì <250,000,000
1,2-Benzenedicarboxylic acid, 1,2-diisononyl ester	43.615	-84.1987	738013	28553-12-0	28553120	CASRN	The Dow Chemical Co	2211 H.H. Dow Way		Midland	Midland	MI	48674	08-036-1339									THE DOW CHEMICAL CO	2211 H.H. DOW WAY		MIDLAND	MIDLAND COUNTY	MI	48674	08-036-1339	TSCA10057799	110071000000	325199 All Other Basic Organic Chemical Manufacturing	Import	325211 Plastics Material And Resin Manufacturing	Import			Import	CBI	CBI	CBI	CBI	CBI	CBI	50,000,000 ‚Äì <100,000,000	100,000,000 ‚Äì <250,000,000	100,000,000 ‚Äì <250,000,000	100,000,000 ‚Äì <250,000,000
1,2-Benzenedicarboxylic acid, 1,2-diisononyl ester	47.6393	-122.357	741154	28553-12-0	28553120	CASRN	SILVER FERN CHEMICAL	2226 QUEEN ANNE AVENUE N.		SEATTLE	King	WA	98109	14-454-2433									Silver Fern Chemical	2226 Queen Anne Avenue North		Seattle		WA	98109	14-454-2433	TSCA8180	110057000000	424690 Other Chemical And Allied Products Merchant Wholesalers	Import					Import	0	214255	214255	155200	482517	118300	50,000,000 ‚Äì <100,000,000	100,000,000 ‚Äì <250,000,000	100,000,000 ‚Äì <250,000,000	100,000,000 ‚Äì <250,000,000
1,2-Benzenedicarboxylic acid, 1,2-diisononyl ester	47.6728	-122.107	738803	28553-12-0	28553120	CASRN	UNIVAR SOLUTIONS INC.	3075 Highland Pkwy., Ste. 200		Downers Grove	DuPage	IL	60515-5560	09-887-7053									UNIVAR SOLUTIONS USA INC	17411 NE UNION HILL RD.		REDMOND	KING COUNTY	WA	98052	10-297-1785	TSCA119921	110069000000	424690 Other Chemical And Allied Products Merchant Wholesalers	Import					Import	0	527252	527252	545120	481540	638694	50,000,000 ‚Äì <100,000,000	100,000,000 ‚Äì <250,000,000	100,000,000 ‚Äì <250,000,000	100,000,000 ‚Äì <250,000,000
1,2-Benzenedicarboxylic acid, 1,2-diisooctyl ester	36.0402	-79.7786	717466	27554-26-3	27554263	CASRN	LANXESS CORPORATION	111 RIDC PARK WEST DRIVE		PITTSBURGH	Allegheny	PA	15275	14-585-8770	LANXESS DEUTSCHLAND GMBH	Kennedyplatz 1		Koln		50569	GM	31-546-4482	LANXESS CORPORATION GREENSBORO	520 BROOME RD.		GREENSBORO	GUILFORD COUNTY	NC	27406-3799	06-179-5696	100608461	110000000000	325199 All Other Basic Organic Chemical Manufacturing	Manufacture					Manufacture	61164	0	61164	0	69710	37328	<1,000,000	<1,000,000	<1,000,000	<1,000,000
1,2-Benzenedicarboxylic acid, 1,2-diisooctyl ester	36.5359	-82.5493	722462	27554-26-3	27554263	CASRN	EASTMAN CHEMICAL COMPANY, INC	200 SOUTH WILCOX DRIVE		KINGSPORT	Sullivan	TN	37660-5147	80-889-8381									EASTMAN CHEMICAL CO. B-280 OFF	200 SOUTH WILCOX DRIVE		KINGSPORT	SULLIVAN	TN	37660-5147	80-889-8381	TSCA4101	110057000000	325998 All Other Miscellaneous Chemical Product And Preparation Manufacturing	Withheld					CBI	CBI	CBI	CBI	CBI	CBI	CBI	<1,000,000	<1,000,000	<1,000,000	<1,000,000
1,2-Benzenedicarboxylic acid, 1,2-diisooctyl ester	40.5252	-74.3194	717724	27554-26-3	27554263	CASRN	LANXESS CORPORATION	111 RIDC PARK WEST DRIVE		PITTSBURGH	Allegheny	PA	15275	14-585-8770	LANXESS DEUTSCHLAND GMBH	Kennedyplatz 1		Koln		50569	GM	31-546-4482	LANXESS SOLUTIONS US, INC---FORDS	1020 KING GEORGES POST ROAD		FORDS	MIDDLESEX COUNTY	NJ	08863-2329	82-864-7953	200002180	110006000000	325199 All Other Basic Organic Chemical Manufacturing	Manufacture					Manufacture	CBI	0	CBI	CBI	CBI	CBI	<1,000,000	<1,000,000	<1,000,000	<1,000,000
1,2-Benzenedicarboxylic acid, 1,2-dimethyl ester	29.6394	-95.0628	700233	131-11-3	131113	CASRN	NOURYON FUNCTIONAL CHEMICALS LLC	131 S. DEARBORN ST	SUITE 1000	CHICAGO	Cook	IL	60603	11-713-4378									NOURYON FUNCTIONAL CHEMICALS LLC	12900 BAY PARK ROAD		PASADENA	HARRIS COUNTY	TX	77507	96-896-5884	TSCA5466	110044000000	325199 All Other Basic Organic Chemical Manufacturing	Withheld					CBI	CBI	CBI	CBI	CBI	CBI	CBI	10,000,000 ‚Äì <50,000,000	10,000,000 ‚Äì <50,000,000	10,000,000 ‚Äì <50,000,000	1,000,000 ‚Äì <10,000,000
1,2-Benzenedicarboxylic acid, 1,2-dimethyl ester	30.1546	-95.4631	737007	131-11-3	131113	CASRN	SHRIEVE CHEMICAL COMPANY, LLC	1755 WOODSTEAD COURT		THE WOODLANDS	Montgomery	TX	77380	09-397-2602									SHRIEVE CHEMICAL COMPANY, LLC	1755 WOODSTEAD CT		SPRING	MONTGOMERY COUNTY	TX	77380	09-397-2602	TSCA10051072	110071000000	325998 All Other Miscellaneous Chemical Product And Preparation Manufacturing	Withheld	424690 Other Chemical And Allied Products Merchant Wholesalers	Withheld			CBI	CBI	CBI	CBI	CBI	CBI	0	10,000,000 ‚Äì <50,000,000	10,000,000 ‚Äì <50,000,000	10,000,000 ‚Äì <50,000,000	1,000,000 ‚Äì <10,000,000
1,2-Benzenedicarboxylic acid, 1,2-dimethyl ester	33.4146	-86.8032	729757	131-11-3	131113	CASRN	INDUSTRIAL CHEMICALS INC.	2042 MONTREAT DRIVE		BIRMINGHAM	JEFFERSON	AL	35216	05-097-8329									INDUSTRIAL CHEMICALS INC	2042 MONTREAT DRIVE		VESTAVIA HILLS	JEFFERSON COUNTY	AL	35216	05-097-8329	TSCA4338	110016000000	424690 Other Chemical And Allied Products Merchant Wholesalers	Import					Import	0	10582260	10582260	9920700	10009112	7980652	10,000,000 ‚Äì <50,000,000	10,000,000 ‚Äì <50,000,000	10,000,000 ‚Äì <50,000,000	1,000,000 ‚Äì <10,000,000
1,2-Benzenedicarboxylic acid, 1,2-dimethyl ester	40.7734	-74.4261	726547	131-11-3	131113	CASRN	BASF Corporation	100 Park Avenue		Florham Park	NJ	MI	7932	00-130-7032	BASF SE	Carl-Bosch Strasse 38		Ludwigshafen		60756	GM	31-500-0554	BASF IMPORTS PART 1	100 PARK AVE		FLORHAM PARK	MORRIS COUNTY	NJ	7932	00-130-7032	TSCA130148	110070000000	325199 All Other Basic Organic Chemical Manufacturing	Import					Import	CBI	CBI	CBI	CBI	CBI	CBI	10,000,000 ‚Äì <50,000,000	10,000,000 ‚Äì <50,000,000	10,000,000 ‚Äì <50,000,000	1,000,000 ‚Äì <10,000,000
1,2-Benzenedicarboxylic acid, 1,2-dimethyl ester	41.8798	-87.6294	737107	131-11-3	131113	CASRN	Nouryon Chemicals LLC	131 S DEARBORN SUITE 1000	Suite 1600	CHICAGO	Cook	IL	60603	11-713-4378									NOURYON FUNCTIONAL CHEMICALS LLC	131 S DEARBORN ST	SUITE 1000	CHICAGO	COOK COUNTY	IL	60603	11-713-4378	TSCA10044282	110071000000	325199 All Other Basic Organic Chemical Manufacturing	Both					Import	CBI	CBI	CBI	CBI	CBI	CBI	10,000,000 ‚Äì <50,000,000	10,000,000 ‚Äì <50,000,000	10,000,000 ‚Äì <50,000,000	1,000,000 ‚Äì <10,000,000
1,2-Benzenedicarboxylic acid, 1,2-dinonyl ester	35.6076	-89.2377	722216	84-76-4	84764	CASRN	TEKNOR APEX	505 Central Ave		Pawtucket	Providence	RI	2861	04-536-7968									TEKNOR APEX TENNESSEE CO (AKA HAYWOOD CO)	751 DUPREE STREET		BROWNSVILLE	HAYWOOD COUNTY	TN	38012-1708	05-487-6834	100602605	110000000000	325199 All Other Basic Organic Chemical Manufacturing	Manufacture					Manufacture	CBI	CBI	CBI	CBI	CBI	CBI	<1,000,000	1,000,000 ‚Äì <20,000,000	<1,000,000	<1,000,000
1,2-Benzenedicarboxylic acid, 1,2-dinonyl ester, branched and linear	30.497	-91.1733	708868	68515-45-7	68515457	CASRN	EXXON MOBIL CORPORATION	5959 Las Colinas Blvd		Irving	Dallas	TX	75039-2298	00-121-3214									EXXON MOBIL BR CHEMICAL PLANT	4999 SCENIC HWY.		BATON ROUGE		LA	70805	03-796-1513	TSCA121061	110000000000	325110 Petrochemical Manufacturing	Both	325212 Synthetic Rubber Manufacturing	Both			Manufacture	CBI	0	CBI	CBI	CBI	CBI	1,000,000 ‚Äì <20,000,000	1,000,000 ‚Äì <20,000,000	1,000,000 ‚Äì <20,000,000	1,000,000 ‚Äì <20,000,000
1,2-Benzenedicarboxylic acid, 1,2-dinonyl ester, branched and linear	40.8047	-74.109	726096	68515-45-7	68515457	CASRN	SIKA CORPORATION	201 POLITO AVENUE		LYNDHURST	Bergen	NJ	7071	00-217-9893	SIKA AG	Zugerstrasse 50		Baar		6340	SZ	48-000-0538	SIKA CORP	201 POLITO AVE		LYNDHURST		NJ	7071	00-217-9893	200003869	110019000000	325520 Adhesive Manufacturing	Import									CBI	CBI	CBI	1,000,000 ‚Äì <20,000,000	1,000,000 ‚Äì <20,000,000	1,000,000 ‚Äì <20,000,000	1,000,000 ‚Äì <20,000,000
1,2-Benzenedicarboxylic acid, 1,2-dinonyl ester, branched and linear	42.5329	-71.7081	739087	68515-45-7	68515457	CASRN	MEXICHEM SPECIALTY COMPOUNDS INC dba ALPHAGARY CORP	170 PIONEER DR		LEOMINSTER	WORCESTER	MA	1453	09-743-4484	ORBIA ADVANCE CORP SAB DE CV	Paseo de la Reforma No. 483 Piso 47		Mexico City	Cuauhtemoc	6500	MX	81-099-5415	ALPHAGARY CORP	170 PIONEER DRIVE		LEOMINSTER	WORCESTER	MA	01453-3474	09-743-4484	TSCA7647	110000000000	325991 Custom Compounding Of Purchased Resins	Import						0	0	0	0	0	33069	1,000,000 ‚Äì <20,000,000	1,000,000 ‚Äì <20,000,000	1,000,000 ‚Äì <20,000,000	1,000,000 ‚Äì <20,000,000
1,2-Benzenedicarboxylic acid, 1,2-dioctyl ester	40.7625	-73.9743	702928	117-84-0	117840	CASRN	ICC Industries Inc.	725 Fifth Avenue	14th Floor	New York	New York	NY	10022	04-617-7341									ICC CHEMICAL CORP	725 5TH AVE		NEW YORK	NEW YORK COUNTY	NY	10022	19-281-3111	TSCA10058156	110071000000	424690 Other Chemical And Allied Products Merchant Wholesalers	Import					Import	CBI	CBI	CBI	CBI	CBI	CBI	<1,000,000	<1,000,000	<1,000,000	<1,000,000
1,2-Benzenedicarboxylic acid, 1,2-diundecyl ester	30.497	-91.1733	708845	3648-20-2	3648202	CASRN	EXXON MOBIL CORPORATION	5959 Las Colinas Blvd		Irving	Dallas	TX	75039-2298	00-121-3214									EXXON MOBIL BR CHEMICAL PLANT	4999 SCENIC HWY.		BATON ROUGE		LA	70805	03-796-1513	TSCA121061	110000000000	325110 Petrochemical Manufacturing	Both	325212 Synthetic Rubber Manufacturing	Both			Manufacture	CBI	0	CBI	CBI	CBI	CBI	10,000,000 ‚Äì <50,000,000	10,000,000 ‚Äì <50,000,000	10,000,000 ‚Äì <50,000,000	10,000,000 ‚Äì <50,000,000
1,2-Benzenedicarboxylic acid, 1,2-diundecyl ester	33.8139	-88.5561	731298	3648-20-2	3648202	CASRN	WESTLAKE CHEMICAL CORPORATION	2801 POST OAK BOULEVARD, SUITE 600		HOUSTON	Harris	TX	77056	78-391-8485									WESTLAKE CHEMICAL COMPOUNDS LLC	715 HIGHWAY 25 SOUTH		ABERDEEN	MONROE COUNTY	MS	39730-3403	11-527-0654	TSCA8020	110013000000	325199 All Other Basic Organic Chemical Manufacturing	Manufacture	325991 Custom Compounding Of Purchased Resins	Manufacture			Manufacture	CBI	CBI	CBI	CBI	CBI	CBI	10,000,000 ‚Äì <50,000,000	10,000,000 ‚Äì <50,000,000	10,000,000 ‚Äì <50,000,000	10,000,000 ‚Äì <50,000,000
1,2-Benzenedicarboxylic acid, 1,2-diundecyl ester	33.8247	-118.236	741044	3648-20-2	3648202	CASRN	GEON Performance Solutions LLC	25777 Detroit Road, Suite 202		Westlake	Cuyahoga	OH	44145	11-724-7947	SK ECHO HOLDINGS S R L	6 rue Eugne Ruppert		Luxembourg		L 2453	LU	37-176-4800	GEON PERFORMANCE SOLUTIONS LLC	2104 E 223RD ST		LONG BEACH	LOS ANGELES COUNTY	CA	90810	11-732-9691	TSCA6526	110000000000	325211 Plastics Material And Resin Manufacturing	Both					Import	0	158600	158600	158600	0	0	10,000,000 ‚Äì <50,000,000	10,000,000 ‚Äì <50,000,000	10,000,000 ‚Äì <50,000,000	10,000,000 ‚Äì <50,000,000
1,2-Benzenedicarboxylic acid, 1,2-diundecyl ester	35.1022	-80.8867	739838	3648-20-2	3648202	CASRN	MEXICHEM SPECIALTY COMPOUNDS INC dba ALPHAGARY CORP	170 PIONEER DR		LEOMINSTER	WORCESTER	MA	1453	09-743-4484	ORBIA ADVANCE CORP SAB DE CV	Paseo de la Reforma No. 483 Piso 47		Mexico City	Cuauhtemoc	6500	MX	81-099-5415	ALPHAGARY CORP	9635 INDUSTRIAL DR.		PINEVILLE	MECKLENBURG COUNTY	NC	28134	09-743-4484	TSCA7648	110000000000	325991 Custom Compounding Of Purchased Resins	Import					Import	0	1562402	1562402	1415933	1542631	1748728	10,000,000 ‚Äì <50,000,000	10,000,000 ‚Äì <50,000,000	10,000,000 ‚Äì <50,000,000	10,000,000 ‚Äì <50,000,000
1,2-Benzenedicarboxylic acid, 1,2-diundecyl ester	35.6076	-89.2377	722201	3648-20-2	3648202	CASRN	TEKNOR APEX	505 Central Ave		Pawtucket	Providence	RI	2861	04-536-7968									TEKNOR APEX TENNESSEE CO (AKA HAYWOOD CO)	751 DUPREE STREET		BROWNSVILLE	HAYWOOD COUNTY	TN	38012-1708	05-487-6834	100602605	110000000000	325199 All Other Basic Organic Chemical Manufacturing	Manufacture					Manufacture	CBI	CBI	CBI	CBI	CBI	CBI	10,000,000 ‚Äì <50,000,000	10,000,000 ‚Äì <50,000,000	10,000,000 ‚Äì <50,000,000	10,000,000 ‚Äì <50,000,000
1,2-Benzenedicarboxylic acid, 1,2-diundecyl ester	38.222	-85.8298	702118	3648-20-2	3648202	CASRN	GEON Performance Solutions LLC	25777 Detroit Road, Suite 202		Westlake	Cuyahoga	OH	44145	11-724-7947	SK ECHO HOLDINGS S R L	6 rue Eugne Ruppert		Luxembourg		L 2453	LU	37-176-4800	GEON PERFORMANCE SOLUTIONS LLC	4250 BELLS LN		LOUISVILLE	JEFFERSON COUNTY	KY	40211	80-104-0098	TSCA6525	110040000000	325211 Plastics Material And Resin Manufacturing	Both					Import	0	4895200	4895200	5516900	6114700	6174600	10,000,000 ‚Äì <50,000,000	10,000,000 ‚Äì <50,000,000	10,000,000 ‚Äì <50,000,000	10,000,000 ‚Äì <50,000,000
1,2-Benzenedicarboxylic acid, 1,2-diundecyl ester	39.5047	-87.3623	701106	3648-20-2	3648202	CASRN	GEON Performance Solutions LLC	25777 Detroit Road, Suite 202		Westlake	Cuyahoga	OH	44145	11-724-7947	SK ECHO HOLDINGS S R L	6 rue Eugne Ruppert		Luxembourg		L 2453	LU	37-176-4800	GEON PERFORMANCE SOLUTIONS LLC	3100 N 35TH ST		TERRE HAUTE	VIGO COUNTY	IN	47804	12-157-4909	TSCA6527	110000000000	325211 Plastics Material And Resin Manufacturing	Both					Import	0	350000	350000	0	0	0	10,000,000 ‚Äì <50,000,000	10,000,000 ‚Äì <50,000,000	10,000,000 ‚Äì <50,000,000	10,000,000 ‚Äì <50,000,000
1,2-Benzenedicarboxylic acid, 1,2-diundecyl ester	40.7734	-74.4261	726775	3648-20-2	3648202	CASRN	BASF Corporation	100 Park Avenue		Florham Park	NJ	MI	7932	00-130-7032	BASF SE	Carl-Bosch Strasse 38		Ludwigshafen		60756	GM	31-500-0554	BASF IMPORTS PART 1	100 PARK AVE		FLORHAM PARK	MORRIS COUNTY	NJ	7932	00-130-7032	TSCA130148	110070000000	325199 All Other Basic Organic Chemical Manufacturing	Import					Import	CBI	CBI	CBI	CBI	CBI	CBI	10,000,000 ‚Äì <50,000,000	10,000,000 ‚Äì <50,000,000	10,000,000 ‚Äì <50,000,000	10,000,000 ‚Äì <50,000,000
1,2-Benzenedicarboxylic acid, 1,2-diundecyl ester	41.1791	-83.6691	707881	3648-20-2	3648202	CASRN	POLYONE CORPORATION	33587 WALKER ROAD		AVON LAKE	Lorain	OH	44012	84-508-2861									POLYONE CORP NORTH BALTIMORE	733 EAST WATER STREET		NORTH BALTIMORE	WOOD	OH	45872-1434	15-039-1902	100607535	110000000000	325510 Paint And Coating Manufacturing	Import					Import	0	133974	133974	132079	155403	201480	10,000,000 ‚Äì <50,000,000	10,000,000 ‚Äì <50,000,000	10,000,000 ‚Äì <50,000,000	10,000,000 ‚Äì <50,000,000
1,2-Benzenedicarboxylic acid, 1,2-diundecyl ester	41.3753	-82.1402	708686	3648-20-2	3648202	CASRN	POLYONE CORPORATION	33587 WALKER ROAD		AVON LAKE	Lorain	OH	44012	84-508-2861									Elyria Distribution Ctr.	1404 Lowell Street		Elyria		OH	44035	11-724-7947	TSCA6537	110057000000	424610 Plastics Materials And Basic Forms And Shapes Merchant Wholesalers	Import					Import	0	113097	113097	369054	406753	408737	10,000,000 ‚Äì <50,000,000	10,000,000 ‚Äì <50,000,000	10,000,000 ‚Äì <50,000,000	10,000,000 ‚Äì <50,000,000
1,2-Benzenedicarboxylic acid, 1,2-diundecyl ester	42.5329	-71.7081	739081	3648-20-2	3648202	CASRN	MEXICHEM SPECIALTY COMPOUNDS INC dba ALPHAGARY CORP	170 PIONEER DR		LEOMINSTER	WORCESTER	MA	1453	09-743-4484	ORBIA ADVANCE CORP SAB DE CV	Paseo de la Reforma No. 483 Piso 47		Mexico City	Cuauhtemoc	6500	MX	81-099-5415	ALPHAGARY CORP	170 PIONEER DRIVE		LEOMINSTER	WORCESTER	MA	01453-3474	09-743-4484	TSCA7647	110000000000	325991 Custom Compounding Of Purchased Resins	Import					Import	0	1095872	1095872	615471	1310067	695176	10,000,000 ‚Äì <50,000,000	10,000,000 ‚Äì <50,000,000	10,000,000 ‚Äì <50,000,000	10,000,000 ‚Äì <50,000,000
1,2-Benzenedicarboxylic acid, 1,2-diundecyl ester, branched and linear	41.8855	-71.3637	736795	85507-79-5	85507795	CASRN	TEKNOR APEX CO	505 CENTRAL AVE		PAWTUCKET	Providence	RI	2861	04-536-7968									TEKNOR APEX CO	505 CENTRAL AVENUE		PAWTUCKET	PROVIDENCE	RI	02861-1900	04-536-7968	100603114	110000000000	325991 Custom Compounding Of Purchased Resins	Import					Import	CBI	CBI	CBI	CBI	CBI	CBI	<1,000,000	<1,000,000	<1,000,000	<1,000,000
1,2-Benzenedicarboxylic acid, 1-[1-methyl-2-[(2-methyl-1-oxo-2-propen-1-yl)oxy]ethyl] ester	40.4634	-79.9688	724556	65859-45-2	65859452	CASRN	PressureKem, LLC	3324 Chelsea Ave.		Memphis	Shelby	TN	38108	00-449-8432									PRESSURE CHEMICAL CO	3419 SMALLMAN STREET		PITTSBURGH	ALLEGHENY COUNTY	PA	15201-1997	00-449-8432	100602616	110000000000	325199 All Other Basic Organic Chemical Manufacturing	Manufacture					Manufacture	19133	0	19133	46981	28089	27972	19133	46981	28089	27972
1,2-Benzenedicarboxylic acid, 1-[2,2-dimethyl-1-(1-methylethyl)-3-(2-methyl-1-oxopropoxy)propyl] 2-(phenylmethyl) ester	39.7942	-75.3967	727414	16883-83-3	16883833	CASRN	Valtris	7500 East Pleasant Valley		Independence	cuyahoga	OH	44131	07-979-5537									POLYMER ADDITIVES, INC.	170 ROUTE 130 SOUTH		BRIDGEPORT	GLOUCESTER COUNTY	NJ	8014	07-971-0078	TSCA95283	110001000000	325199 All Other Basic Organic Chemical Manufacturing	Both					Manufacture	CBI	CBI	CBI	CBI	CBI	CBI	1,000,000 ‚Äì <20,000,000	1,000,000 ‚Äì <20,000,000	1,000,000 ‚Äì <20,000,000	1,000,000 ‚Äì <20,000,000
1,2-Benzenedicarboxylic acid, 1-[2-[(1-oxo-2-propen-1-yl)oxy]ethyl] ester	36.7883	-79.4026	740035	30697-40-6	30697406	CASRN	Arkema Delaware Inc.	900 FIRST AVENUE	Bldg 10	KING OF PRUSSIA	Montgomery	PA	19406	00-229-0773	ARKEMA	420 rue d'Estienne d'Orves		Colombes	Cedex	92705	FR	26-840-1833	ARKEMA INC. - SARTOMER	601 TIGHTSQUEEZE INDL. RD.		CHATHAM	PITTSYLVANIA COUNTY	VA	24531-3678	00-229-0773	100607869	110000000000	325211 Plastics Material And Resin Manufacturing	Manufacture					Manufacture	CBI	CBI	CBI	CBI	CBI	CBI	<1,000,000	<1,000,000	<1,000,000	<1,000,000
1,2-Benzenedicarboxylic acid, 1-[2-[(2-methyl-1-oxo-2-propen-1-yl)oxy]ethyl] ester	36.7883	-79.4026	740034	27697-00-3	27697003	CASRN	Arkema Delaware Inc.	900 FIRST AVENUE	Bldg 10	KING OF PRUSSIA	Montgomery	PA	19406	00-229-0773	ARKEMA	420 rue d'Estienne d'Orves		Colombes	Cedex	92705	FR	26-840-1833	ARKEMA INC. - SARTOMER	601 TIGHTSQUEEZE INDL. RD.		CHATHAM	PITTSYLVANIA COUNTY	VA	24531-3678	00-229-0773	100607869	110000000000	325211 Plastics Material And Resin Manufacturing	Manufacture					Manufacture	CBI	CBI	CBI	CBI	CBI	CBI	<1,000,000	<1,000,000	<1,000,000	<1,000,000
1,2-Benzenedicarboxylic acid, 1-butyl 2-(phenylmethyl) ester	39.7942	-75.3967	727426	85-68-7	85687	CASRN	Valtris	7500 East Pleasant Valley		Independence	cuyahoga	OH	44131	07-979-5537									POLYMER ADDITIVES, INC.	170 ROUTE 130 SOUTH		BRIDGEPORT	GLOUCESTER COUNTY	NJ	8014	07-971-0078	TSCA95283	110001000000	325199 All Other Basic Organic Chemical Manufacturing	Both					Manufacture	CBI	CBI	CBI	CBI	CBI	CBI	1,000,000 ‚Äì <20,000,000	1,000,000 ‚Äì <20,000,000	1,000,000 ‚Äì <20,000,000	1,000,000 ‚Äì <20,000,000
1,2-Benzenedicarboxylic acid, 1-butyl 2-(phenylmethyl) ester	41.458	-81.5164	730779	85-68-7	85687	CASRN	CBI	CBI	CBI	CBI	CBI	CBI	CBI	CBI	CBI	CBI	CBI	CBI	CBI	CBI	CBI	CBI	TREMCO INCORPORATED	3735 GREEN ROAD		BEACHWOOD	CUYAHOGA COUNTY	OH	44122	00-418-8702	TSCA122704	110013000000	325510 Paint And Coating Manufacturing	Import	325520 Adhesive Manufacturing	Import			Import	0	605212	605212	125892	146569	185996	1,000,000 ‚Äì <20,000,000	1,000,000 ‚Äì <20,000,000	1,000,000 ‚Äì <20,000,000	1,000,000 ‚Äì <20,000,000
1,2-Benzenedicarboxylic acid, 1-butyl 2-(phenylmethyl) ester	43.2016	-86.2944	724510	85-68-7	85687	CASRN	CBI	CBI	CBI	CBI	CBI	CBI	CBI	CBI	CBI	CBI	CBI	CBI	CBI	CBI	CBI	CBI	M. ARGUESO & CO., INC.	2817 MCCRACKEN ST		MUSKEGON	MUSKEGON COUNTY	MI	49441	41-930-0645	TSCA123424	110070000000	325520 Adhesive Manufacturing	Both	325998 All Other Miscellaneous Chemical Product And Preparation Manufacturing	Manufacture			Import	0	5903	5903	3273	2945	2698	1,000,000 ‚Äì <20,000,000	1,000,000 ‚Äì <20,000,000	1,000,000 ‚Äì <20,000,000	1,000,000 ‚Äì <20,000,000
1,2-Benzenedicarboxylic acid, 3,4,5,6-tetrabromo-, 1,2-bis(2-ethylhexyl) ester	33.1847	-92.7069	717363	26040-51-7	26040517	CASRN	LANXESS CORPORATION	111 RIDC PARK WEST DRIVE		PITTSBURGH	Allegheny	PA	15275	14-585-8770	LANXESS DEUTSCHLAND GMBH	Kennedyplatz 1		Koln		50569	GM	31-546-4482	GREAT LAKES CHEMICAL - CENTRAL	2226 HAYNESVILLE HIGHWAY		EL DORADO	UNION	AR	71730-9712	00-521-2808	TSCA5371	110000000000	325199 All Other Basic Organic Chemical Manufacturing	Manufacture					Manufacture	CBI	0	CBI	CBI	CBI	CBI	1,000,000 ‚Äì <10,000,000	1,000,000 ‚Äì <10,000,000	1,000,000 ‚Äì <10,000,000	1,000,000 ‚Äì <10,000,000
1,2-Benzenedicarboxylic acid, 3,4,5,6-tetrabromo-, 1,2-bis(2-ethylhexyl) ester	34.6688	-82.1962	702643	26040-51-7	26040517	CASRN	CRI Tolling	300 International Blvd		Fountain Inn	Laurens	SC	29644	05-098-1474									CRI TOLLING	300 INTERNATIONAL BLVD		FOUNTAIN INN	LAURENS COUNTY	SC	29644	05-098-1474	TSCA110881	110069000000	325199 All Other Basic Organic Chemical Manufacturing	Manufacture					Manufacture	40766	0	40766	0	0	0	1,000,000 ‚Äì <10,000,000	1,000,000 ‚Äì <10,000,000	1,000,000 ‚Äì <10,000,000	1,000,000 ‚Äì <10,000,000
1,2-Benzenedicarboxylic acid, 3,4,5,6-tetrabromo-, 1,2-bis(2-ethylhexyl) ester	35.6076	-89.2377	722192	26040-51-7	26040517	CASRN	TEKNOR APEX	505 Central Ave		Pawtucket	Providence	RI	2861	04-536-7968									TEKNOR APEX TENNESSEE CO (AKA HAYWOOD CO)	751 DUPREE STREET		BROWNSVILLE	HAYWOOD COUNTY	TN	38012-1708	05-487-6834	100602605	110000000000	325199 All Other Basic Organic Chemical Manufacturing	Manufacture					Manufacture	CBI	CBI	CBI	CBI	CBI	CBI	1,000,000 ‚Äì <10,000,000	1,000,000 ‚Äì <10,000,000	1,000,000 ‚Äì <10,000,000	1,000,000 ‚Äì <10,000,000
1,2-Benzenedicarboxylic acid, 3,4,5,6-tetrabromo-, 1,2-bis(2-ethylhexyl) ester	36.0402	-79.7786	717465	26040-51-7	26040517	CASRN	LANXESS CORPORATION	111 RIDC PARK WEST DRIVE		PITTSBURGH	Allegheny	PA	15275	14-585-8770	LANXESS DEUTSCHLAND GMBH	Kennedyplatz 1		Koln		50569	GM	31-546-4482	LANXESS CORPORATION GREENSBORO	520 BROOME RD.		GREENSBORO	GUILFORD COUNTY	NC	27406-3799	06-179-5696	100608461	110000000000	325199 All Other Basic Organic Chemical Manufacturing	Manufacture					Manufacture	2107540	0	2107540	1837208	2121329	4367498	1,000,000 ‚Äì <10,000,000	1,000,000 ‚Äì <10,000,000	1,000,000 ‚Äì <10,000,000	1,000,000 ‚Äì <10,000,000
1,2-Benzenedicarboxylic acid, 3,4,5,6-tetrabromo-, 1-[2-(2-hydroxyethoxy)ethyl] 2-(2-hydroxypropyl) ester	30.1604	-95.4559	701464	20566-35-2	20566352	CASRN	HUNTSMAN INTERNATIONAL LLC	10003 Woodloch Forest Dr		THE WOODLANDS	Montgomery	TX	77380	96-864-2079									HUNTSMAN CORPORATION - THE WOODLANDS CORPORATE SITE	10003 WOODLOCH FOREST DR.		THE WOODLANDS	MONTGOMERY	TX	77380	96-864-2079	100606419	110036000000	325199 All Other Basic Organic Chemical Manufacturing	Import					Import	CBI	CBI	CBI	CBI	CBI	CBI	<1,000,000	<1,000,000	<1,000,000	<1,000,000
1,2-Benzenedicarboxylic acid, 3,4,5,6-tetrabromo-, mixed esters with diethylene glycol and propylene glycol	33.1139	-92.6726	717595	77098-07-8	77098078	CASRN	LANXESS CORPORATION	111 RIDC PARK WEST DRIVE		PITTSBURGH	Allegheny	PA	15275	14-585-8770	LANXESS DEUTSCHLAND GMBH	Kennedyplatz 1		Koln		50569	GM	31-546-4482	GREAT LAKES CHEMICAL - SOUTH PLANT	324 SOUTHFIELD CUTOFF		EL DORADO	UNION	AR	71730	00-521-2808	TSCA5372	110000000000	325199 All Other Basic Organic Chemical Manufacturing	Manufacture					Manufacture	CBI	0	CBI	CBI	CBI	CBI	10,000,000 ‚Äì <50,000,000	10,000,000 ‚Äì <50,000,000	10,000,000 ‚Äì <50,000,000	10,000,000 ‚Äì <50,000,000
1,2-Benzenedicarboxylic acid, 3,4,5,6-tetrabromo-, mixed esters with diethylene glycol and propylene glycol	33.4674	-80.8832	718888	77098-07-8	77098078	CASRN	SI GROUP, INC.	2750 BALLTOWN RD.		SCHENECTADY	SCHENECTADY	NY	12309	00-207-0100									SI GROUP	725 CANNON BRIDGE RD		ORANGEBURG	ORANGEBURG COUNTY	SC	29115	00-207-0100	TSCA87903	110067000000	325199 All Other Basic Organic Chemical Manufacturing	Manufacture					Manufacture	CBI	0	CBI	CBI	CBI	CBI	10,000,000 ‚Äì <50,000,000	10,000,000 ‚Äì <50,000,000	10,000,000 ‚Äì <50,000,000	10,000,000 ‚Äì <50,000,000
1,2-Benzenedicarboxylic acid, 3,4,5,6-tetrabromo-, mixed esters with diethylene glycol and propylene glycol	41.8058	-87.8174	705844	77098-07-8	77098078	CASRN	ELE CORPORATION	7847 W. 47TH STREET		MCCOOK	Cook	IL	60525	15-341-7530									ELE CORPORATION	7847 47TH ST		MCCOOK	COOK COUNTY	IL	60525	15-341-7530	200000053	110001000000	325199 All Other Basic Organic Chemical Manufacturing	Manufacture					Manufacture	707640	0	707640	349496	525189	862727	10,000,000 ‚Äì <50,000,000	10,000,000 ‚Äì <50,000,000	10,000,000 ‚Äì <50,000,000	10,000,000 ‚Äì <50,000,000
1,2-Benzenedicarboxylic acid, 3,4,5,6-tetrachloro-, 1,2-bis(2-ethylhexyl) ester	35.6076	-89.2377	722200	34832-88-7	34832887	CASRN	TEKNOR APEX	505 Central Ave		Pawtucket	Providence	RI	2861	04-536-7968									TEKNOR APEX TENNESSEE CO (AKA HAYWOOD CO)	751 DUPREE STREET		BROWNSVILLE	HAYWOOD COUNTY	TN	38012-1708	05-487-6834	100602605	110000000000	325199 All Other Basic Organic Chemical Manufacturing	Manufacture					Manufacture	CBI	CBI	CBI	CBI	CBI	CBI	<1,000,000	<1,000,000	<1,000,000	<1,000,000
1,2-Benzenedicarboxylic acid, 4-sulfo-	39.236	-84.4617	741913	89-08-7	89087	CASRN	PILOT CHEMICAL CO	9075 Centre Pointe Dr.	Suite 400	West Chester	Butler	OH	45069	00-828-7823									PILOT CHEMICAL COMPANY	606 SHEPHERD DR		CINCINNATI	HAMILTON COUNTY	OH	45215	82-463-9512	200003396	110000000000	325194 Cyclic Crude, Intermediate, And Gum And Wood Chemical Manufacturing	Manufacture	325613 Surface Active Agent Manufacturing	Manufacture			Manufacture	433527	0	433527	455454	533740	391038	433527	455454	533740	391038
1,2-Benzenedicarboxylic acid, benzyl C7-9-branched and linear alkyl esters	30.3506	-95.4418	705087	68515-40-2	68515402	CASRN	HEMPEL (USA) INC.	600 CONROE PARK NORTH DRIVE		CONROE	Montgomery	TX	77303	00-128-3944									HEMPEL USA	600 N CONROE PARK DR		CONROE	MONTGOMERY COUNTY	TX	77303	00-128-3944	TSCA123508	110005000000	325510 Paint And Coating Manufacturing	Import						0	0	0	0	58808	0	1,000,000 ‚Äì <20,000,000	1,000,000 ‚Äì <20,000,000	20,000,000 ‚Äì <100,000,000	20,000,000 ‚Äì <100,000,000
1,2-Benzenedicarboxylic acid, benzyl C7-9-branched and linear alkyl esters	39.7942	-75.3967	727422	68515-40-2	68515402	CASRN	Valtris	7500 East Pleasant Valley		Independence	cuyahoga	OH	44131	07-979-5537									POLYMER ADDITIVES, INC.	170 ROUTE 130 SOUTH		BRIDGEPORT	GLOUCESTER COUNTY	NJ	8014	07-971-0078	TSCA95283	110001000000	325199 All Other Basic Organic Chemical Manufacturing	Both					Manufacture	CBI	CBI	CBI	CBI	CBI	CBI	1,000,000 ‚Äì <20,000,000	1,000,000 ‚Äì <20,000,000	20,000,000 ‚Äì <100,000,000	20,000,000 ‚Äì <100,000,000
1,2-Benzenedicarboxylic acid, benzyl C7-9-branched and linear alkyl esters	40.7734	-74.4261	726970	68515-40-2	68515402	CASRN	BASF Corporation	100 Park Avenue		Florham Park	NJ	MI	7932	00-130-7032	BASF SE	Carl-Bosch Strasse 38		Ludwigshafen		60756	GM	31-500-0554	BASF IMPORTS PART 1	100 PARK AVE		FLORHAM PARK	MORRIS COUNTY	NJ	7932	00-130-7032	TSCA130148	110070000000	325199 All Other Basic Organic Chemical Manufacturing	Import					Import	CBI	CBI	CBI	CBI	CBI	CBI	1,000,000 ‚Äì <20,000,000	1,000,000 ‚Äì <20,000,000	20,000,000 ‚Äì <100,000,000	20,000,000 ‚Äì <100,000,000
1,2-Benzenedicarboxylic acid, di-C11-14-branched alkyl esters, C13-rich	30.497	-91.1733	708869	68515-47-9	68515479	CASRN	EXXON MOBIL CORPORATION	5959 Las Colinas Blvd		Irving	Dallas	TX	75039-2298	00-121-3214									EXXON MOBIL BR CHEMICAL PLANT	4999 SCENIC HWY.		BATON ROUGE		LA	70805	03-796-1513	TSCA121061	110000000000	325110 Petrochemical Manufacturing	Both	325212 Synthetic Rubber Manufacturing	Both			Manufacture	CBI	0	CBI	CBI	CBI	CBI	1,000,000 ‚Äì <20,000,000	20,000,000 ‚Äì <100,000,000	1,000,000 ‚Äì <20,000,000	20,000,000 ‚Äì <100,000,000
1,2-Benzenedicarboxylic acid, di-C11-14-branched alkyl esters, C13-rich	38.222	-85.8298	702122	68515-47-9	68515479	CASRN	GEON Performance Solutions LLC	25777 Detroit Road, Suite 202		Westlake	Cuyahoga	OH	44145	11-724-7947	SK ECHO HOLDINGS S R L	6 rue Eugne Ruppert		Luxembourg		L 2453	LU	37-176-4800	GEON PERFORMANCE SOLUTIONS LLC	4250 BELLS LN		LOUISVILLE	JEFFERSON COUNTY	KY	40211	80-104-0098	TSCA6525	110040000000	325211 Plastics Material And Resin Manufacturing	Both						0	0	0	0	0	93400	1,000,000 ‚Äì <20,000,000	20,000,000 ‚Äì <100,000,000	1,000,000 ‚Äì <20,000,000	20,000,000 ‚Äì <100,000,000
1,2-Benzenedicarboxylic acid, di-C11-14-branched alkyl esters, C13-rich	39.1853	-84.501	709884	68515-47-9	68515479	CASRN	BASF Corp	100 Park Ave		Florham Park	Morris	NJ	7932	00-130-7032	BASF SE	Carl-Bosch-Str-38		Ludwigshafen		67056	GM	31-500-0554	BASF CORP	5000 ESTECREEK DR		CINCINNATI	HAMILTON COUNTY	OH	45232	11-457-1107	TSCA122966	110070000000	325199 All Other Basic Organic Chemical Manufacturing	Manufacture					Manufacture	CBI	CBI	CBI	CBI	CBI	CBI	1,000,000 ‚Äì <20,000,000	20,000,000 ‚Äì <100,000,000	1,000,000 ‚Äì <20,000,000	20,000,000 ‚Äì <100,000,000
1,2-Benzenedicarboxylic acid, di-C11-14-branched alkyl esters, C13-rich	40.5252	-74.3194	717741	68515-47-9	68515479	CASRN	LANXESS CORPORATION	111 RIDC PARK WEST DRIVE		PITTSBURGH	Allegheny	PA	15275	14-585-8770	LANXESS DEUTSCHLAND GMBH	Kennedyplatz 1		Koln		50569	GM	31-546-4482	LANXESS SOLUTIONS US, INC---FORDS	1020 KING GEORGES POST ROAD		FORDS	MIDDLESEX COUNTY	NJ	08863-2329	82-864-7953	200002180	110006000000	325199 All Other Basic Organic Chemical Manufacturing	Manufacture					Manufacture	CBI	0	CBI	CBI	CBI	CBI	1,000,000 ‚Äì <20,000,000	20,000,000 ‚Äì <100,000,000	1,000,000 ‚Äì <20,000,000	20,000,000 ‚Äì <100,000,000
1,2-Benzenedicarboxylic acid, di-C6-14-branched and linear alkyl esters	35.6076	-89.2377	722196	309934-69-8	309934698	CASRN	TEKNOR APEX	505 Central Ave		Pawtucket	Providence	RI	2861	04-536-7968									TEKNOR APEX TENNESSEE CO (AKA HAYWOOD CO)	751 DUPREE STREET		BROWNSVILLE	HAYWOOD COUNTY	TN	38012-1708	05-487-6834	100602605	110000000000	325199 All Other Basic Organic Chemical Manufacturing	Manufacture					Manufacture	CBI	CBI	CBI	CBI	CBI	CBI	1,000,000 ‚Äì <20,000,000	1,000,000 ‚Äì <20,000,000	1,000,000 ‚Äì <20,000,000	1,000,000 ‚Äì <20,000,000
1,2-Benzenedicarboxylic acid, di-C8-10-alkyl esters	33.1859	-87.2608	708420	71662-46-9	71662469	CASRN	MERCEDES BENZ U.S	1 MERCEDES DRIVE		VANCE	Tuscaloosa	AL	35490	82-483-9872	DAIMLER AG	Mercedesstr. 120		Stuttgart		70372	GM	82-483-9872	MERCEDES-BENZ US INTERNATIONAL INC	1 MERCEDES DRIVE		VANCE	TUSCALOOSA	AL	35490-2900	82-483-9872	TSCA98604	110000000000	336111 Automobile Manufacturing	Import					Import	0	300000	300000	100000	3900	330000	100,000 ‚Äì <500,000	100,000 ‚Äì <500,000	<1,000,000	<1,000,000
1,2-Benzenedicarboxylic acid, di-C8-10-alkyl esters	42.5313	-71.7097	721527	71662-46-9	71662469	CASRN	Azelis US Holding, Inc.	33 Riverside Avenue	5th Floor	Westport	Fairfield	CT	6880	11-711-0212	AZELIS S A	rue Gabriel Lippmann19		Schuttrange		5365	LU	40-000-2435	MONSON COS INC	154 PIONEER DRIVE		LEOMINSTER	WORCESTER	MA	01453-3498	04-298-0029	TSCA6259	110000000000	424690 Other Chemical And Allied Products Merchant Wholesalers	Import					Import	0	35274	35274	70548	21164	0	100,000 ‚Äì <500,000	100,000 ‚Äì <500,000	<1,000,000	<1,000,000
1,2-Benzenedicarboxylic acid, di-C8-10-alkyl esters	43.615	-84.1987	738083	71662-46-9	71662469	CASRN	The Dow Chemical Co	2211 H.H. Dow Way		Midland	Midland	MI	48674	08-036-1339									THE DOW CHEMICAL CO	2211 H.H. DOW WAY		MIDLAND	MIDLAND COUNTY	MI	48674	08-036-1339	TSCA10057799	110071000000	325199 All Other Basic Organic Chemical Manufacturing	Import	325211 Plastics Material And Resin Manufacturing	Import			Import	CBI	CBI	CBI	CBI	CBI	CBI	100,000 ‚Äì <500,000	100,000 ‚Äì <500,000	<1,000,000	<1,000,000
1,2-Benzenedicarboxylic acid, di-C8-10-branched alkyl esters, C9-rich	29.7375	-95.4606	712603	68515-48-0	68515480	CASRN	WESTLAKE CHEMICAL CORPORATION	2801 POST OAK BOULEVARD, SUITE 600		HOUSTON	Harris	TX	77056	78-391-8485									WESTLAKE COMPOUNDS LLC	2801 POST OAK BLVD	SUITE 600	HOUSTON	HARRIS COUNTY	TX	77056	08-108-3605	TSCA10068559	110071000000	325199 All Other Basic Organic Chemical Manufacturing	Import	325991 Custom Compounding Of Purchased Resins	Import			Import	CBI	CBI	CBI	CBI	CBI	CBI	100,000,000 ‚Äì <1,000,000,000	100,000,000 ‚Äì <1,000,000,000	100,000,000 ‚Äì <1,000,000,000	100,000,000 ‚Äì <1,000,000,000
1,2-Benzenedicarboxylic acid, di-C8-10-branched alkyl esters, C9-rich	30.1037	-95.4465	714292	68515-48-0	68515480	CASRN	Exxon Mobil Corporation	5959 Las Colinas Blvd.		Irving	Dallas	TX	75039-2298	00-121-3214									EXXONMOBIL CHEMICAL COMPANY	22777 SPRINGWOODS VILLAGE PKWY	NATURE 1	SPRING	HARRIS COUNTY	TX	77389	07-908-2094	TSCA99565	110067000000	325110 Petrochemical Manufacturing	Withheld					CBI	CBI	CBI	CBI	CBI	CBI	CBI	100,000,000 ‚Äì <1,000,000,000	100,000,000 ‚Äì <1,000,000,000	100,000,000 ‚Äì <1,000,000,000	100,000,000 ‚Äì <1,000,000,000
1,2-Benzenedicarboxylic acid, di-C8-10-branched alkyl esters, C9-rich	30.497	-91.1733	708870	68515-48-0	68515480	CASRN	EXXON MOBIL CORPORATION	5959 Las Colinas Blvd		Irving	Dallas	TX	75039-2298	00-121-3214									EXXON MOBIL BR CHEMICAL PLANT	4999 SCENIC HWY.		BATON ROUGE		LA	70805	03-796-1513	TSCA121061	110000000000	325110 Petrochemical Manufacturing	Both	325212 Synthetic Rubber Manufacturing	Both			Manufacture	CBI	0	CBI	CBI	CBI	CBI	100,000,000 ‚Äì <1,000,000,000	100,000,000 ‚Äì <1,000,000,000	100,000,000 ‚Äì <1,000,000,000	100,000,000 ‚Äì <1,000,000,000
1,2-Benzenedicarboxylic acid, di-C8-10-branched alkyl esters, C9-rich	35.6076	-89.2377	722210	68515-48-0	68515480	CASRN	TEKNOR APEX	505 Central Ave		Pawtucket	Providence	RI	2861	04-536-7968									TEKNOR APEX TENNESSEE CO (AKA HAYWOOD CO)	751 DUPREE STREET		BROWNSVILLE	HAYWOOD COUNTY	TN	38012-1708	05-487-6834	100602605	110000000000	325199 All Other Basic Organic Chemical Manufacturing	Manufacture					Manufacture	CBI	CBI	CBI	CBI	CBI	CBI	100,000,000 ‚Äì <1,000,000,000	100,000,000 ‚Äì <1,000,000,000	100,000,000 ‚Äì <1,000,000,000	100,000,000 ‚Äì <1,000,000,000
1,2-Benzenedicarboxylic acid, di-C8-10-branched alkyl esters, C9-rich	35.7433	-78.8478	709438	68515-48-0	68515480	CASRN	M.A.GLOBAL RESOURCES INC	1028 BRANCH LINE LANE		APEX	wake	NC	27502	39-323-6166									M.A.GLOBAL RESOURCES INC	1028 BRANCH LINE LN		APEX	WAKE COUNTY	NC	27502	39-323-6166	TSCA122883	110069000000	424690 Other Chemical And Allied Products Merchant Wholesalers	Import									44092	132000	0	100,000,000 ‚Äì <1,000,000,000	100,000,000 ‚Äì <1,000,000,000	100,000,000 ‚Äì <1,000,000,000	100,000,000 ‚Äì <1,000,000,000
1,2-Benzenedicarboxylic acid, di-C8-10-branched alkyl esters, C9-rich	40.8934	-74.2684	713427	68515-48-0	68515480	CASRN	Soyventis North America LLC	695 Route 46 W	Ste 406	Fairfield	Essex	NJ	7004	83-301-4959									SOYVENTIS NORTH AMERICA LLC	695 ROUTE 46 W	STE 406	FAIRFIELD	ESSEX COUNTY	NJ	7004	83-301-4959	TSCA10051418	110071000000	422690 Other Chemical And Allied Products Wholesalers	Import						0	0	0	0	59910	82000	100,000,000 ‚Äì <1,000,000,000	100,000,000 ‚Äì <1,000,000,000	100,000,000 ‚Äì <1,000,000,000	100,000,000 ‚Äì <1,000,000,000
1,2-Benzenedicarboxylic acid, di-C8-10-branched alkyl esters, C9-rich	45.3656	-122.824	704536	68515-48-0	68515480	CASRN	CASCADE COLUMBIA	6900 FOX AVE S		SEATTLE	King	WA	98108	02-741-7807									CASCADE COLUMBIA DISTRIBUTION	14200 SOUTHWEST TUALATIN SHERWOOD ROAD		SHERWOOD	WASHINGTON	OR	97140-9624	86-831-8908	TSCA7783	110057000000	424690 Other Chemical And Allied Products Merchant Wholesalers						Import	0	1486170	1486170	2267652	975153	482285	100,000,000 ‚Äì <1,000,000,000	100,000,000 ‚Äì <1,000,000,000	100,000,000 ‚Äì <1,000,000,000	100,000,000 ‚Äì <1,000,000,000
1,2-Benzenedicarboxylic acid, di-C8-10-branched alkyl esters, C9-rich	47.6728	-122.107	738845	68515-48-0	68515480	CASRN	UNIVAR SOLUTIONS INC.	3075 Highland Pkwy., Ste. 200		Downers Grove	DuPage	IL	60515-5560	09-887-7053									UNIVAR SOLUTIONS USA INC	17411 NE UNION HILL RD.		REDMOND	KING COUNTY	WA	98052	10-297-1785	TSCA119921	110069000000	424690 Other Chemical And Allied Products Merchant Wholesalers	Import					Import	0	527252	527252	545120	481540	638694	100,000,000 ‚Äì <1,000,000,000	100,000,000 ‚Äì <1,000,000,000	100,000,000 ‚Äì <1,000,000,000	100,000,000 ‚Äì <1,000,000,000
1,2-Benzenedicarboxylic acid, di-C9-11-branched alkyl esters, C10-rich	30.497	-91.1733	708871	68515-49-1	68515491	CASRN	EXXON MOBIL CORPORATION	5959 Las Colinas Blvd		Irving	Dallas	TX	75039-2298	00-121-3214									EXXON MOBIL BR CHEMICAL PLANT	4999 SCENIC HWY.		BATON ROUGE		LA	70805	03-796-1513	TSCA121061	110000000000	325110 Petrochemical Manufacturing	Both	325212 Synthetic Rubber Manufacturing	Both			Manufacture	CBI	0	CBI	CBI	CBI	CBI	100,000,000 ‚Äì <1,000,000,000	100,000,000 ‚Äì <1,000,000,000	100,000,000 ‚Äì <1,000,000,000	100,000,000 ‚Äì <1,000,000,000
1,2-Benzenedicarboxylic acid, di-C9-11-branched alkyl esters, C10-rich	35.6076	-89.2377	722211	68515-49-1	68515491	CASRN	TEKNOR APEX	505 Central Ave		Pawtucket	Providence	RI	2861	04-536-7968									TEKNOR APEX TENNESSEE CO (AKA HAYWOOD CO)	751 DUPREE STREET		BROWNSVILLE	HAYWOOD COUNTY	TN	38012-1708	05-487-6834	100602605	110000000000	325199 All Other Basic Organic Chemical Manufacturing	Manufacture									CBI	CBI	CBI	100,000,000 ‚Äì <1,000,000,000	100,000,000 ‚Äì <1,000,000,000	100,000,000 ‚Äì <1,000,000,000	100,000,000 ‚Äì <1,000,000,000
1,2-Benzenedicarboxylic acid, di-C9-11-branched alkyl esters, C10-rich	40.5252	-74.3194	717742	68515-49-1	68515491	CASRN	LANXESS CORPORATION	111 RIDC PARK WEST DRIVE		PITTSBURGH	Allegheny	PA	15275	14-585-8770	LANXESS DEUTSCHLAND GMBH	Kennedyplatz 1		Koln		50569	GM	31-546-4482	LANXESS SOLUTIONS US, INC---FORDS	1020 KING GEORGES POST ROAD		FORDS	MIDDLESEX COUNTY	NJ	08863-2329	82-864-7953	200002180	110006000000	325199 All Other Basic Organic Chemical Manufacturing	Manufacture					Manufacture	CBI	0	CBI	CBI	CBI	CBI	100,000,000 ‚Äì <1,000,000,000	100,000,000 ‚Äì <1,000,000,000	100,000,000 ‚Äì <1,000,000,000	100,000,000 ‚Äì <1,000,000,000
1,2-Benzenedicarboxylic acid, di-C9-11-branched alkyl esters, C10-rich	40.8047	-74.109	726097	68515-49-1	68515491	CASRN	SIKA CORPORATION	201 POLITO AVENUE		LYNDHURST	Bergen	NJ	7071	00-217-9893	SIKA AG	Zugerstrasse 50		Baar		6340	SZ	48-000-0538	SIKA CORP	201 POLITO AVE		LYNDHURST		NJ	7071	00-217-9893	200003869	110019000000	325520 Adhesive Manufacturing	Import					Import	CBI	CBI	CBI	CBI	CBI	CBI	100,000,000 ‚Äì <1,000,000,000	100,000,000 ‚Äì <1,000,000,000	100,000,000 ‚Äì <1,000,000,000	100,000,000 ‚Äì <1,000,000,000
1,2-Benzenedicarboxylic acid, di-C9-11-branched alkyl esters, C10-rich	41.4981	-81.6915	725724	68515-49-1	68515491	CASRN	The Sherwin Williams Company	101 Prospect Ave NW		Cleveland	Cuyahoga	OH	44115	00-420-6397									THE SHERWIN-WILLIAMS COMPANY	101 PROSPECT AVE. NW		CLEVELAND	CUYAHOGA COUNTY	OH	44115-1075	00-420-6397	200003830	110005000000	325510 Paint And Coating Manufacturing	Both	444120 Paint And Wallpaper Stores	Import			Import	CBI	CBI	CBI	CBI	CBI	CBI	100,000,000 ‚Äì <1,000,000,000	100,000,000 ‚Äì <1,000,000,000	100,000,000 ‚Äì <1,000,000,000	100,000,000 ‚Äì <1,000,000,000
1,2-Benzenedicarboxylic acid, di-C9-11-branched alkyl esters, C10-rich	45.0331	-93.0942	708799	68515-49-1	68515491	CASRN	3M COMPANY	3M CENTER, BUILDING 220-6E-03		ST. PAUL	Ramsey	MN	55144	00-617-3082									3M COMPANY	3M CENTER		ST PAUL	RAMSEY	MN	55144-1000	00-617-3082	100604318	110036000000	322220 Paper Bag And Coated And Treated Paper Manufacturing	Import	326113 Unlaminated Plastics Film And Sheet (Except Packaging) Manufacturing	Import	325520 Adhesive Manufacturing	Import	Import	CBI	CBI	CBI	CBI	CBI	CBI	100,000,000 ‚Äì <1,000,000,000	100,000,000 ‚Äì <1,000,000,000	100,000,000 ‚Äì <1,000,000,000	100,000,000 ‚Äì <1,000,000,000
1,2-Benzenedicarboxylic acid, di-C9-11-branched and linear alkyl esters	30.497	-91.1733	708867	68515-43-5	68515435	CASRN	EXXON MOBIL CORPORATION	5959 Las Colinas Blvd		Irving	Dallas	TX	75039-2298	00-121-3214									EXXON MOBIL BR CHEMICAL PLANT	4999 SCENIC HWY.		BATON ROUGE		LA	70805	03-796-1513	TSCA121061	110000000000	325110 Petrochemical Manufacturing	Both	325212 Synthetic Rubber Manufacturing	Both			Manufacture	CBI	0	CBI	CBI	CBI	CBI	10,000,000 ‚Äì <50,000,000	10,000,000 ‚Äì <50,000,000	10,000,000 ‚Äì <50,000,000	10,000,000 ‚Äì <50,000,000
1,2-Benzenedicarboxylic acid, di-C9-11-branched and linear alkyl esters	33.8139	-88.5561	731299	68515-43-5	68515435	CASRN	WESTLAKE CHEMICAL CORPORATION	2801 POST OAK BOULEVARD, SUITE 600		HOUSTON	Harris	TX	77056	78-391-8485									WESTLAKE CHEMICAL COMPOUNDS LLC	715 HIGHWAY 25 SOUTH		ABERDEEN	MONROE COUNTY	MS	39730-3403	11-527-0654	TSCA8020	110013000000	325199 All Other Basic Organic Chemical Manufacturing	Manufacture	325991 Custom Compounding Of Purchased Resins	Manufacture			Manufacture	CBI	CBI	CBI	CBI	CBI	CBI	10,000,000 ‚Äì <50,000,000	10,000,000 ‚Äì <50,000,000	10,000,000 ‚Äì <50,000,000	10,000,000 ‚Äì <50,000,000
1,2-Benzenedicarboxylic acid, di-C9-11-branched and linear alkyl esters	35.1022	-80.8867	739842	68515-43-5	68515435	CASRN	MEXICHEM SPECIALTY COMPOUNDS INC dba ALPHAGARY CORP	170 PIONEER DR		LEOMINSTER	WORCESTER	MA	1453	09-743-4484	ORBIA ADVANCE CORP SAB DE CV	Paseo de la Reforma No. 483 Piso 47		Mexico City	Cuauhtemoc	6500	MX	81-099-5415	ALPHAGARY CORP	9635 INDUSTRIAL DR.		PINEVILLE	MECKLENBURG COUNTY	NC	28134	09-743-4484	TSCA7648	110000000000	325991 Custom Compounding Of Purchased Resins	Import					Import	0	44158	44158	0	130226	43784	10,000,000 ‚Äì <50,000,000	10,000,000 ‚Äì <50,000,000	10,000,000 ‚Äì <50,000,000	10,000,000 ‚Äì <50,000,000
1,2-Benzenedicarboxylic acid, di-C9-11-branched and linear alkyl esters	35.6076	-89.2377	722209	68515-43-5	68515435	CASRN	TEKNOR APEX	505 Central Ave		Pawtucket	Providence	RI	2861	04-536-7968									TEKNOR APEX TENNESSEE CO (AKA HAYWOOD CO)	751 DUPREE STREET		BROWNSVILLE	HAYWOOD COUNTY	TN	38012-1708	05-487-6834	100602605	110000000000	325199 All Other Basic Organic Chemical Manufacturing	Manufacture					Manufacture	CBI	CBI	CBI	CBI	CBI	CBI	10,000,000 ‚Äì <50,000,000	10,000,000 ‚Äì <50,000,000	10,000,000 ‚Äì <50,000,000	10,000,000 ‚Äì <50,000,000
1,2-Benzenedicarboxylic acid, di-C9-11-branched and linear alkyl esters	38.222	-85.8298	702121	68515-43-5	68515435	CASRN	GEON Performance Solutions LLC	25777 Detroit Road, Suite 202		Westlake	Cuyahoga	OH	44145	11-724-7947	SK ECHO HOLDINGS S R L	6 rue Eugne Ruppert		Luxembourg		L 2453	LU	37-176-4800	GEON PERFORMANCE SOLUTIONS LLC	4250 BELLS LN		LOUISVILLE	JEFFERSON COUNTY	KY	40211	80-104-0098	TSCA6525	110040000000	325211 Plastics Material And Resin Manufacturing	Both					Import	0	2071300	2071300	2783200	1812000	2208000	10,000,000 ‚Äì <50,000,000	10,000,000 ‚Äì <50,000,000	10,000,000 ‚Äì <50,000,000	10,000,000 ‚Äì <50,000,000
1,2-Benzenedicarboxylic acid, di-C9-11-branched and linear alkyl esters	39.5047	-87.3623	701109	68515-43-5	68515435	CASRN	GEON Performance Solutions LLC	25777 Detroit Road, Suite 202		Westlake	Cuyahoga	OH	44145	11-724-7947	SK ECHO HOLDINGS S R L	6 rue Eugne Ruppert		Luxembourg		L 2453	LU	37-176-4800	GEON PERFORMANCE SOLUTIONS LLC	3100 N 35TH ST		TERRE HAUTE	VIGO COUNTY	IN	47804	12-157-4909	TSCA6527	110000000000	325211 Plastics Material And Resin Manufacturing	Both					Import	0	119000	119000	0	0	0	10,000,000 ‚Äì <50,000,000	10,000,000 ‚Äì <50,000,000	10,000,000 ‚Äì <50,000,000	10,000,000 ‚Äì <50,000,000
1,2-Benzenedicarboxylic acid, di-C9-11-branched and linear alkyl esters	40.3314	-75.1462	706336	68515-43-5	68515435	CASRN	PENN COLOR, INC.	400 OLD DUBLIN PIKE		DOYLESTOWN	BUCKS COUNTY	PA	18901	05-471-1163									PENN COLOR INC	400 OLD DUBLIN PIKE		DOYLESTOWN	BUCKS COUNTY	PA	18901	05-471-1163	100607449	110000000000	325510 Paint And Coating Manufacturing	Import						0	0	0	180550	299594	259913	10,000,000 ‚Äì <50,000,000	10,000,000 ‚Äì <50,000,000	10,000,000 ‚Äì <50,000,000	10,000,000 ‚Äì <50,000,000
1,2-Benzenedicarboxylic acid, di-C9-11-branched and linear alkyl esters	40.7486	-73.9855	705269	68515-43-5	68515435	CASRN	ALAC International Inc	350 Fifth Avenue	Suite 3015	New York	New York	NY	10118	36-282-4687									ALAC INTERNATIONAL INC.	350 5TH AVE		NEW YORK	NEW YORK COUNTY	NY	10118	36-282-4687	TSCA10050149	110071000000	424610 Plastics Materials And Basic Forms And Shapes Merchant Wholesalers	Import					Import	0	778160	778160	86660	128771	8818	10,000,000 ‚Äì <50,000,000	10,000,000 ‚Äì <50,000,000	10,000,000 ‚Äì <50,000,000	10,000,000 ‚Äì <50,000,000
1,2-Benzenedicarboxylic acid, di-C9-11-branched and linear alkyl esters	40.7734	-74.4261	726971	68515-43-5	68515435	CASRN	BASF Corporation	100 Park Avenue		Florham Park	NJ	MI	7932	00-130-7032	BASF SE	Carl-Bosch Strasse 38		Ludwigshafen		60756	GM	31-500-0554	BASF IMPORTS PART 1	100 PARK AVE		FLORHAM PARK	MORRIS COUNTY	NJ	7932	00-130-7032	TSCA130148	110070000000	325199 All Other Basic Organic Chemical Manufacturing	Import					Import	CBI	CBI	CBI	CBI	CBI	CBI	10,000,000 ‚Äì <50,000,000	10,000,000 ‚Äì <50,000,000	10,000,000 ‚Äì <50,000,000	10,000,000 ‚Äì <50,000,000
1,2-Benzenedicarboxylic acid, di-C9-11-branched and linear alkyl esters	41.3713	-82.138	704165	68515-43-5	68515435	CASRN	GEON Performance Solutions LLC	25777 Detroit Road, Suite 202		Westlake	Cuyahoga	OH	44145	11-724-7947	SK ECHO HOLDINGS S R L	6 rue Eugne Ruppert		Luxembourg		L 2453	LU	37-176-4800	GEON PERFORMANCE SOLUTIONS LLC	1406 LOWELL ST		ELYRIA	LORAIN COUNTY	OH	44035	96-723-1155	TSCA10057931	110071000000	424610 Plastics Materials And Basic Forms And Shapes Merchant Wholesalers	Both					Import	0	61500	61500	0	0	0	10,000,000 ‚Äì <50,000,000	10,000,000 ‚Äì <50,000,000	10,000,000 ‚Äì <50,000,000	10,000,000 ‚Äì <50,000,000
1,2-Benzenedicarboxylic acid, di-C9-11-branched and linear alkyl esters	41.3753	-82.1402	708695	68515-43-5	68515435	CASRN	POLYONE CORPORATION	33587 WALKER ROAD		AVON LAKE	Lorain	OH	44012	84-508-2861									Elyria Distribution Ctr.	1404 Lowell Street		Elyria		OH	44035	11-724-7947	TSCA6537	110057000000	424610 Plastics Materials And Basic Forms And Shapes Merchant Wholesalers	Import					Import	0	248020	248020	470246	585327	642868	10,000,000 ‚Äì <50,000,000	10,000,000 ‚Äì <50,000,000	10,000,000 ‚Äì <50,000,000	10,000,000 ‚Äì <50,000,000
1,2-Benzenedicarboxylic acid, di-C9-11-branched and linear alkyl esters	41.494	-71.3762	726332	68515-43-5	68515435	CASRN	The Chemical Company	44 Southwest Avenue		Jamestown	Newport	RI	2835	15-362-2584									THE CHEMICAL COMPANY	44 SOUTHWEST AVE	PO BOX 436	JAMESTOWN	NEWPORT COUNTY	RI	2835	15-362-2584	TSCA108221	110068000000	424690 Other Chemical And Allied Products Merchant Wholesalers	Import					Import	CBI	CBI	CBI	0	0	0	10,000,000 ‚Äì <50,000,000	10,000,000 ‚Äì <50,000,000	10,000,000 ‚Äì <50,000,000	10,000,000 ‚Äì <50,000,000
1,2-Benzenedicarboxylic acid, di-C9-11-branched and linear alkyl esters	42.5329	-71.7081	739086	68515-43-5	68515435	CASRN	MEXICHEM SPECIALTY COMPOUNDS INC dba ALPHAGARY CORP	170 PIONEER DR		LEOMINSTER	WORCESTER	MA	1453	09-743-4484	ORBIA ADVANCE CORP SAB DE CV	Paseo de la Reforma No. 483 Piso 47		Mexico City	Cuauhtemoc	6500	MX	81-099-5415	ALPHAGARY CORP	170 PIONEER DRIVE		LEOMINSTER	WORCESTER	MA	01453-3474	09-743-4484	TSCA7647	110000000000	325991 Custom Compounding Of Purchased Resins	Import					Import	0	1340176	1340176	130866	1521931	792505	10,000,000 ‚Äì <50,000,000	10,000,000 ‚Äì <50,000,000	10,000,000 ‚Äì <50,000,000	10,000,000 ‚Äì <50,000,000
1,2-Benzenedicarboxylic acid, mixed cetyl and stearyl esters	34.5151	-90.6495	706437	68442-70-6	68442706	CASRN	Norac Additives LLC	360 Phillips 311 RD		Helena	Phillips	AR	72342	03-627-8570	PETER GREVEN GMBH & CO KG	Peter-Greven-Strasse 20-30		D-53902 Bad Munstereifel			GM	00-000-0000	NORAC ADDITIVES LLC	360 PHILLIPS 311 ROAD		HELENA-WEST HELENA		AR	72342	03-627-8570	TSCA10058154	110070000000	325199 All Other Basic Organic Chemical Manufacturing	Both					Import	CBI	CBI	CBI	CBI	CBI	CBI	<1,000,000	1,000,000 ‚Äì <20,000,000	<1,000,000	<1,000,000
1,2-Benzenedicarboxylic acid, mixed cetyl and stearyl esters	39.1798	-84.5079	712069	68442-70-6	68442706	CASRN	EMERY OLEOCHEMICALS	4900 ESTE AVENUE		CINCINNATI,	Hamilton	OH	45232	61-401-0838	EMERY OLEOCHEMICALS (M) SDN BHD	Lot 4, Jalan Perak, Kawasan Perusahaan,		Telok Panglima Garang		42500	MY	65-202-4605	EMERY OLEOCHEMICALS	4900 ESTE AVENUE		CINCINNATI	HAMILTON	OH	45232	61-401-0838	TSCA4335	110067000000	325199 All Other Basic Organic Chemical Manufacturing	Both					Manufacture	CBI	0	CBI	CBI	CBI	0	<1,000,000	1,000,000 ‚Äì <20,000,000	<1,000,000	<1,000,000
1,2-Benzenedicarboxylic acid, mixed cetyl and stearyl esters	39.8969	-75.2334	710084	68442-70-6	68442706	CASRN	Akdeniz Chemson Additives Inc.	7825 HOLSTEIN AVE		PHILADELPHIA	Philadelphia	PA	19153	79-432-9532									AKDENIZ CHEMSON ADDITIVES INC.	7825 HOLSTEIN AVE		PHILADELPHIA	PHILADELPHIA COUNTY	PA	19153	79-432-9532	100605214	110014000000	325998 All Other Miscellaneous Chemical Product And Preparation Manufacturing	Both					Import	0	88185	88185	55116	44092	70546	<1,000,000	1,000,000 ‚Äì <20,000,000	<1,000,000	<1,000,000
1,2-Benzenedicarboxylic acid, mixed decyl and hexyl and octyl diesters	40.7734	-74.4261	726982	68648-93-1	68648931	CASRN	BASF Corporation	100 Park Avenue		Florham Park	NJ	MI	7932	00-130-7032	BASF SE	Carl-Bosch Strasse 38		Ludwigshafen		60756	GM	31-500-0554	BASF IMPORTS PART 1	100 PARK AVE		FLORHAM PARK	MORRIS COUNTY	NJ	7932	00-130-7032	TSCA130148	110070000000	325199 All Other Basic Organic Chemical Manufacturing	Import						0	0	0	0	CBI	CBI	0	0	<1,000,000	<1,000,000
1,2-Benzenedicarboxylic acid, sodium salt (1:2)	40.2887	-83.0825	705508	15968-01-1	15968011	CASRN	HENKEL CORPORATION	1 HENKEL WAY		ROCKY HILL	Hartford	CT	6067	08-088-7708									HENKEL DELAWARE	421 LONDON RD		DELAWARE	DELAWARE COUNTY	OH	43015	00-429-4385	TSCA120465	110069000000	325520 Adhesive Manufacturing	Both						0	0	0	0	100957	115541	63087	82100	187378	191159
1,2-Benzenedicarboxylic acid, sodium salt (1:2)	40.4575	-80.1933	707064	15968-01-1	15968011	CASRN	LANXESS CORPORATION	111 RIDC PARK WEST DRIVE		PITTSBURGH	Allegheny	PA	15275	14-585-8770	LANXESS DEUTSCHLAND GMBH	Kennedyplatz 1		Koln		50569	GM	31-546-4482	LANXESS CORPORATION---PITTSBURGH	111 RIDC PARK WEST DR		PITTSBURGH	ALLEGHENY COUNTY	PA	15275-1112	14-585-8770	100606790	110024000000	325130 Synthetic Dye And Pigment Manufacturing	Import	325199 All Other Basic Organic Chemical Manufacturing	Import			Import	0	63087	63087	82100	86421	75618	63087	82100	187378	191159
1,2-Benzenediol	30.5078	-91.1827	716492	120-80-9	120809	CASRN	Solvay USA Inc	504 Carnegie Center		Princeton	Mercer	NJ	8540	00-295-9810									PQ CORPORATION - ECO SERVICES	1275 AIRLINE HWY.		BATON ROUGE	EAST BATON ROUGE PARISH	LA	70805	00-816-1234	100607747	110000000000	311942 Spice And Extract Manufacturing	Manufacture					Manufacture	CBI	CBI	CBI	CBI	CBI	CBI	1,000,000 ‚Äì <20,000,000	20,000,000 ‚Äì <100,000,000	20,000,000 ‚Äì <100,000,000	1,000,000 ‚Äì <20,000,000
1,2-Benzenediol	33.4242	-111.998	740616	120-80-9	120809	CASRN	Sumitomo Chemical Advanced Technologies LLC	3832 East Watkins Street		Phoenix	Maricopa	AZ	85034	12-881-8916	SUMITOMO CHEMICAL CO LTD	Tokyo Sumitomo Twin Bldg	Higashi-kan 2-27-1	Shinkawa	Chuo-ku	104-8260	JA	69-053-5307	SUMITOMO CHEMICAL ADVANCED TECHNOLOGIES LLC	3832 E WATKINS ST		PHOENIX	MARICOPA COUNTY	AZ	85034	12-881-8916	TSCA10051996	110012000000	334413 Semiconductor And Related Device Manufacturing						Import	CBI	CBI	CBI	CBI	CBI	CBI	1,000,000 ‚Äì <20,000,000	20,000,000 ‚Äì <100,000,000	20,000,000 ‚Äì <100,000,000	1,000,000 ‚Äì <20,000,000
1,2-Benzenediol	40.3143	-74.6523	740850	120-80-9	120809	CASRN	Solvay Holding Inc	504 Carnegie Center		Princeton	Mercer	NJ	8540	87-474-8937	SOLVAY S A	RUE DE RANSBEEK, 310	1120 Brussels	Brussels			BE	37-000-9086	SOLVAY USA INC	504 CARNEGIE CTR		PRINCETON	MERCER COUNTY	NJ	8540	00-295-9810	TSCA123682	110070000000	325199 All Other Basic Organic Chemical Manufacturing	Manufacture					Import	CBI	CBI	CBI	CBI	CBI	CBI	1,000,000 ‚Äì <20,000,000	20,000,000 ‚Äì <100,000,000	20,000,000 ‚Äì <100,000,000	1,000,000 ‚Äì <20,000,000
1,2-Benzenediol	40.7188	-73.9372	726348	120-80-9	120809	CASRN	JOS. H. LOWENSTEIN & SONS, INC.	420 MORGAN AVE.		BROOKLYN	BROOKLYN	NY	11222	06-829-6839									JOS. H. LOWENSTEIN & SONS INC	420 MORGAN AVE		BROOKLYN		NY	11222	06-829-6839	TSCA3992	110057000000	325130 Synthetic Dye And Pigment Manufacturing	Both					Import	0	24250	24250	72752	81406	37037	1,000,000 ‚Äì <20,000,000	20,000,000 ‚Äì <100,000,000	20,000,000 ‚Äì <100,000,000	1,000,000 ‚Äì <20,000,000
1,2-Benzenediol	42.4105	-83.4285	731652	120-80-9	120809	CASRN	UBE AMERICA INC.	38777 6 MILE RD	SUITE 400	LIVONIA	WAYNE COUNTY	MI	48152	78-761-4064	UBE INDUSTRIES LTD	Seavans North Building, 1-2-1		Shibaura, Tokyo	Minato-ku	105-8449	JA	69-056-0008	UBE AMERICA INC.	38777 6 MILE RD	SUITE 400	LIVONIA	WAYNE COUNTY	MI	48152	78-761-4064	TSCA10037950	110071000000	424690 Other Chemical And Allied Products Merchant Wholesalers						Import	CBI	CBI	CBI	CBI	CBI	CBI	1,000,000 ‚Äì <20,000,000	20,000,000 ‚Äì <100,000,000	20,000,000 ‚Äì <100,000,000	1,000,000 ‚Äì <20,000,000
1,2-Benzenediol	45.0331	-93.0942	708734	120-80-9	120809	CASRN	3M COMPANY	3M CENTER, BUILDING 220-6E-03		ST. PAUL	Ramsey	MN	55144	00-617-3082									3M COMPANY	3M CENTER		ST PAUL	RAMSEY	MN	55144-1000	00-617-3082	100604318	110036000000	322220 Paper Bag And Coated And Treated Paper Manufacturing	Import	326113 Unlaminated Plastics Film And Sheet (Except Packaging) Manufacturing	Import	325520 Adhesive Manufacturing	Import	Import	CBI	CBI	CBI	CBI	CBI	CBI	1,000,000 ‚Äì <20,000,000	20,000,000 ‚Äì <100,000,000	20,000,000 ‚Äì <100,000,000	1,000,000 ‚Äì <20,000,000
1,2-Benzenediol, 4-(1,1-dimethylethyl)-	29.9516	-93.8873	709100	98-29-3	98293	CASRN	BASF CORP	100 Park Ave		Florham Park	Morris	NJ	7932	00-130-7032	BASF SE	Carl-Bosch-Str-38		Ludwigshafen		67056	GM	31-500-0554	BASF FINA PETROCHEMICALS	7501 GULFWAY DR		PORT ARTHUR	JEFFERSON	TX	77642-0301	13-110-0765	TSCA4549	110006000000	325110 Petrochemical Manufacturing						Manufacture	CBI	0	CBI	CBI	0	CBI	1,000,000 ‚Äì <10,000,000	1,000,000 ‚Äì <10,000,000	1,000,000 ‚Äì <10,000,000	1,000,000 ‚Äì <10,000,000
1,2-Benzenediol, 4-(1,1-dimethylethyl)-	34.8703	-89.669	705690	98-29-3	98293	CASRN	AC Polymers Inc	PO Box 165		Poultney	Rutland	VT	5764	84-460-5712									AC POLYMERS INC	103 LOWRY DRIVE		BYHALIA		MS	38611	84-460-5712	TSCA10058217	110065000000	325211 Plastics Material And Resin Manufacturing	Import					Import	0	267	267	446	87	0	1,000,000 ‚Äì <10,000,000	1,000,000 ‚Äì <10,000,000	1,000,000 ‚Äì <10,000,000	1,000,000 ‚Äì <10,000,000
1,2-Benzenediol, 4-(1,1-dimethylethyl)-	40.3143	-74.6523	740987	98-29-3	98293	CASRN	Solvay Holding Inc	504 Carnegie Center		Princeton	Mercer	NJ	8540	87-474-8937	SOLVAY S A	RUE DE RANSBEEK, 310	1120 Brussels	Brussels			BE	37-000-9086	SOLVAY USA INC	504 CARNEGIE CTR		PRINCETON	MERCER COUNTY	NJ	8540	00-295-9810	TSCA123682	110070000000	325199 All Other Basic Organic Chemical Manufacturing	Manufacture					Import	CBI	CBI	CBI	CBI	CBI	CBI	1,000,000 ‚Äì <10,000,000	1,000,000 ‚Äì <10,000,000	1,000,000 ‚Äì <10,000,000	1,000,000 ‚Äì <10,000,000
1,2-Benzenediol, 4-(1,1-dimethylethyl)-	40.4575	-80.1933	733033	98-29-3	98293	CASRN	ARLANXEO	111 RIDC Park West Drive		Pittsburgh	Allegheny	PA	15275	14-585-8770									ARLANXEO--HQ	111 RIDC PARK WEST DR		PITTSBURGH	ALLEGHENY COUNTY	PA	15275	14-585-8770	TSCA108841	110068000000	325212 Synthetic Rubber Manufacturing	Import					Import	0	15976	15976	19359	13486	14671	1,000,000 ‚Äì <10,000,000	1,000,000 ‚Äì <10,000,000	1,000,000 ‚Äì <10,000,000	1,000,000 ‚Äì <10,000,000
1,2-Benzisothiazol-3(2H)-one	27.9459	-82.4581	728343	2634-33-5	2634335	CASRN	Yara North America	100 North Tampa Street	Suite 3200	Tampa	Hillsborough	FL	33602	79-516-3518									YARA NORTH AMERICA-CORPORATE OFFICE	100 NORTH TAMPA STREET, SUITE 3200		TAMPA		FL	33602	79-516-3518	100600138	110057000000	424910 Farm Supplies Merchant Wholesalers	Import					Import	0	104	104	95	144	60	<1,000,000	95	144	60
1,2-Benzisothiazol-3(2H)-one, 1,1-dioxide	39.18	-84.4901	739421	81-07-2	81072	CASRN	PMC Global Inc	12243 Branford St		Sun Valley	Los Angeles	CA	91352	00-531-8584									PMC SPECIALTIES GROUP, INC.	501 MURRAY RD.		CINCINNATI		OH	45217	94-278-6666	100603823	110000000000	325199 All Other Basic Organic Chemical Manufacturing	Withheld					CBI	CBI	CBI	CBI	CBI	CBI	CBI	<1,000,000	<1,000,000	<1,000,000	<1,000,000
1,2-Benzisothiazol-3(2H)-one, 1,1-dioxide, sodium salt (1:1)	34.947	-80.9502	737437	128-44-9	128449	CASRN	Alpha US Bidco, Inc.	1750 OVERVIEW DRIVE		ROCK HILL	York County	SC	29730	08-095-2508									ATOTECH USA, LLC	1750 OVERVIEW DRIVE		ROCK HILL	YORK COUNTY	SC	29730	80-018-5910	TSCA4575	110000000000	325998 All Other Miscellaneous Chemical Product And Preparation Manufacturing	Import					Import	0	12431	12431	3852	1114	1781	100,000 ‚Äì <500,000	100,000 ‚Äì <500,000	100,000 ‚Äì <500,000	100,000 ‚Äì <500,000
1,2-Benzisothiazol-3(2H)-one, 1,1-dioxide, sodium salt (1:1)	39.18	-84.4901	739413	128-44-9	128449	CASRN	PMC Global Inc	12243 Branford St		Sun Valley	Los Angeles	CA	91352	00-531-8584									PMC SPECIALTIES GROUP, INC.	501 MURRAY RD.		CINCINNATI		OH	45217	94-278-6666	100603823	110000000000	325199 All Other Basic Organic Chemical Manufacturing	Both					Import	CBI	CBI	CBI	CBI	CBI	CBI	100,000 ‚Äì <500,000	100,000 ‚Äì <500,000	100,000 ‚Äì <500,000	100,000 ‚Äì <500,000
1,2-Benzisothiazol-3(2H)-one, 1,1-dioxide, sodium salt (1:1)	41.0298	-73.774	706580	128-44-9	128449	CASRN	Marubeni America Corporation	375 Lexington Ave.		New York	New York	NY	10017	00-167-0876									MARUBENI SPECIALTY CHEMICALS INC.	10 BANK ST	SUITE 740	WHITE PLAINS	WESTCHESTER COUNTY	NY	10606	78-727-6633	TSCA4463	110005000000	424690 Other Chemical And Allied Products Merchant Wholesalers	Import					Import	0	44092	44092	88537	94793	89771	100,000 ‚Äì <500,000	100,000 ‚Äì <500,000	100,000 ‚Äì <500,000	100,000 ‚Äì <500,000
1,2-Benzisothiazol-3(2H)-one, 1,1-dioxide, sodium salt (1:1)	41.7135	-87.8033	700711	128-44-9	128449	CASRN	Element Solutions Inc.	245 Freight Street		Waterbury	New Haven	CT	6702	07-927-0103									ENTHONE INC	9809 INDUSTRIAL DR.		BRIDGEVIEW	COOK	IL	60455-2393	06-997-3790	TSCA5270	110000000000	325998 All Other Miscellaneous Chemical Product And Preparation Manufacturing	Import						0	0	0	0	3786	35756	100,000 ‚Äì <500,000	100,000 ‚Äì <500,000	100,000 ‚Äì <500,000	100,000 ‚Äì <500,000
1,2-Benzisothiazol-3(2H)-one, 1,1-dioxide, sodium salt (1:1)	42.4567	-83.1189	712708	128-44-9	128449	CASRN	Element Solutions Inc.	245 FREIGHT STREET		WATERBURY	New Haven	CT	6702	07-927-0103									MACDERMID INC	1221 FARROW AVENUE		FERNDALE	OAKLAND COUNTY	MI	48220-1959	00-533-8371	TSCA8117	110000000000	325998 All Other Miscellaneous Chemical Product And Preparation Manufacturing	Import					Import	0	55180	55180	76306	101703	60627	100,000 ‚Äì <500,000	100,000 ‚Äì <500,000	100,000 ‚Äì <500,000	100,000 ‚Äì <500,000
1,2-Butadiene	29.5433	-95.0639	741129	590-19-2	590192	CASRN	INEOS US I Inc	2600 SOUTH SHORE BLVD	suite 250	LEAGUE CITY	Galveston	TX	77573	96-801-6761									INEOS Oligomers	2600 South Shore Blvd		League City		TX	77573	96-801-6761	TSCA9511	110057000000	325199 All Other Basic Organic Chemical Manufacturing	Import					Import	0	118322	118322	118322	118609	117506	330705	1014756	2257647	1169751
1,2-Butadiene	29.7222	-95.1269	720880	590-19-2	590192	CASRN	Shell Chemical LP	5900 Hwy 225		DEER PARK	HARRIS	TX	77536	61-814-3986	ROYAL DUTCH SHELL PLC	Shell Centre	2 York Road	London		SE1 7NA	UK	42-379-2808	SHELL CHEMICAL LP	5900 HWY 225		DEER PARK	HARRIS	TX	77536	61-814-3986	714	110031000000	325199 All Other Basic Organic Chemical Manufacturing	Manufacture					Manufacture	38069	0	38069	26853	70733	71994	330705	1014756	2257647	1169751
1,2-Butadiene	29.9944	-90.4073	720023	590-19-2	590192	CASRN	Shell Chemical LP	15536 River Road		NORCO	St. Charles	LA	70079	01-777-4071	ROYAL DUTCH SHELL PLC	Shell Centre		London		SE17 NA	UK	42-379-2808	SHELL NORCO CHEMICAL PLANT EAST SITE	15536 RIVER ROAD		NORCO	ST. CHARLES	LA	70079-2537	96-756-4753	100607915	110014000000	325199 All Other Basic Organic Chemical Manufacturing	Manufacture					Manufacture	144736	0	144736	721276	1979376	862447	330705	1014756	2257647	1169751
1,2-Butadiene	40.4575	-80.1933	733018	590-19-2	590192	CASRN	ARLANXEO	111 RIDC Park West Drive		Pittsburgh	Allegheny	PA	15275	14-585-8770									ARLANXEO--HQ	111 RIDC PARK WEST DR		PITTSBURGH	ALLEGHENY COUNTY	PA	15275	14-585-8770	TSCA108841	110068000000	325212 Synthetic Rubber Manufacturing	Import					Import	0	29578	29578	148305	88929	117804	330705	1014756	2257647	1169751
1,2-Butanediol	40.7635	-73.9707	737325	584-03-2	584032	CASRN	Kowa Holdings America, Inc.	55 EAST 59TH STREET	19th Floor	New York	New York	NY	10022	83-931-1123	KOWA CO LTD	3-6-29, Nishiki	Naka-Ku	Nagoya		460-0003	JA	69-059-8511	KOWA AMERICAN CORP.	55 E 59TH ST		NEW YORK	NEW YORK COUNTY	NY	10022	06-493-0274	TSCA121781	110012000000	424690 Other Chemical And Allied Products Merchant Wholesalers	Import					Import	CBI	CBI	CBI	CBI	CBI	CBI	<1,000,000	<1,000,000	<1,000,000	<1,000,000
1,2-Cyclohexanediamine	28.6731	-96.9536	733152	694-83-7	694837	CASRN	Koch Industries	4111 E. 37th St. N		Wichita	Sedgwick	KS	67201-2256	00-694-4334									INV NYLON CHEMICALS AMERICAS LLC	2695 OLD BLOOMINGTON ROAD NORTH		VICTORIA	VICTORIA COUNTY	TX	77905-1840	04-842-1247	TSCA4440	110000000000	325199 All Other Basic Organic Chemical Manufacturing	Withheld	325320 Pesticide And Other Agricultural Chemical Manufacturing	Withheld			CBI	CBI	CBI	CBI	CBI	CBI	CBI	1,000,000 ‚Äì <10,000,000	1,000,000 ‚Äì <10,000,000	1,000,000 ‚Äì <10,000,000	1,000,000 ‚Äì <10,000,000
1,2-Cyclohexanediamine	30.0558	-93.7919	733251	694-83-7	694837	CASRN	Koch Industries, Inc.	4111 E. 37th St. N		Wichita	Sedwick	KS	67201-2256	00-694-4334									INVISTA SARL - ORANGE SITE	3055A FM 1006		ORANGE	ORANGE	TX	77630	04-842-1247	100606562	110023000000	325199 All Other Basic Organic Chemical Manufacturing	Manufacture	325320 Pesticide And Other Agricultural Chemical Manufacturing	Manufacture			Manufacture	CBI	0	CBI	CBI	CBI	CBI	1,000,000 ‚Äì <10,000,000	1,000,000 ‚Äì <10,000,000	1,000,000 ‚Äì <10,000,000	1,000,000 ‚Äì <10,000,000
1,2-Cyclohexanediamine	30.2457	-95.3763	718517	694-83-7	694837	CASRN	Lamberti USA, Inc.	P.O. Box 1000		Hungerford	Wharton	TX	77448	12-505-6379									LAMBERTI USA CONROE PLANT 8910	14292 KOALSTAD RD		CONROE	MONTGOMERY COUNTY	TX	77302	12-505-6397	TSCA8426	110034000000	325613 Surface Active Agent Manufacturing	Both									CBI	CBI	CBI	1,000,000 ‚Äì <10,000,000	1,000,000 ‚Äì <10,000,000	1,000,000 ‚Äì <10,000,000	1,000,000 ‚Äì <10,000,000
1,2-Cyclohexanediamine	30.5952	-87.2534	722003	694-83-7	694837	CASRN	Ascend Performance Materials Holdings Inc.	1010 Travis Street, Suite 900		Houston	Harris	TX	77002	07-844-9293									ASCEND (PENSACOLA PLANT)	3000 OLD CHEMSTRAND RD		CANTONMENT	ESCAMBIA COUNTY	FL	32533	17-614-3071	TSCA8532	110027000000	325199 All Other Basic Organic Chemical Manufacturing	Withheld					CBI	CBI	CBI	CBI	CBI	CBI	CBI	1,000,000 ‚Äì <10,000,000	1,000,000 ‚Äì <10,000,000	1,000,000 ‚Äì <10,000,000	1,000,000 ‚Äì <10,000,000
1,2-Cyclohexanediamine	34.6296	-87.0277	721975	694-83-7	694837	CASRN	Ascend Performance Materials Holdings Inc.	1010 Travis Street, Suite 900		Houston	Harris	TX	77002	07-844-9293									ASCEND (DECATUR PLANT)	1050 CHEMSTRAND AVE		DECATUR	MORGAN	AL	35601-8900	00-632-0774	100604715	110007000000	325199 All Other Basic Organic Chemical Manufacturing	Manufacture					Manufacture	CBI	CBI	CBI	CBI	CBI	CBI	1,000,000 ‚Äì <10,000,000	1,000,000 ‚Äì <10,000,000	1,000,000 ‚Äì <10,000,000	1,000,000 ‚Äì <10,000,000
1,2-Cyclohexanediamine	37.7523	-97.2883	715581	694-83-7	694837	CASRN	Koch Industries, Inc	4111 East 37th Street North		Wichita	Sedgwick	KS	67220	00-694-4334									INVISTA S.A.R.L.	4123 EAST 37TH STREET NORTH		WICHITA	SEDGWICK	KS	67220-3203	04-691-9772	TSCA6524	110036000000	325199 All Other Basic Organic Chemical Manufacturing	Both					Import	CBI	CBI	CBI	CBI	CBI	CBI	1,000,000 ‚Äì <10,000,000	1,000,000 ‚Äì <10,000,000	1,000,000 ‚Äì <10,000,000	1,000,000 ‚Äì <10,000,000
1,2-Cyclohexanedicarboxylic acid, 1,2-bis(2-oxiranylmethyl) ester	30.1604	-95.4559	701502	5493-45-8	5493458	CASRN	HUNTSMAN INTERNATIONAL LLC	10003 Woodloch Forest Dr		THE WOODLANDS	Montgomery	TX	77380	96-864-2079									HUNTSMAN CORPORATION - THE WOODLANDS CORPORATE SITE	10003 WOODLOCH FOREST DR.		THE WOODLANDS	MONTGOMERY	TX	77380	96-864-2079	100606419	110036000000	325199 All Other Basic Organic Chemical Manufacturing	Import					Import	CBI	CBI	CBI	CBI	CBI	CBI	1,000,000 ‚Äì <10,000,000	1,000,000 ‚Äì <20,000,000	1,000,000 ‚Äì <20,000,000	1,000,000 ‚Äì <20,000,000
1,2-Cyclohexanedicarboxylic acid, 1,2-bis(2-oxiranylmethyl) ester	39.9592	-74.9877	710617	5493-45-8	5493458	CASRN	EMERALD PERFORMANCE MATERIALS LLC	1499 SE TECH CENTER PLACE, SUITE 300		VANCOUVER	Clark	WA	98683	61-938-5586									CVC SPECIALTY CHEMICALS INC	2980 ROUTE 73 NORTH		MAPLE SHADE		NJ	08052-1334	06-831-0150	TSCA4805	110001000000	325199 All Other Basic Organic Chemical Manufacturing	Withheld					CBI	CBI	CBI	CBI	CBI	CBI	CBI	1,000,000 ‚Äì <10,000,000	1,000,000 ‚Äì <20,000,000	1,000,000 ‚Äì <20,000,000	1,000,000 ‚Äì <20,000,000
1,2-Cyclohexanedicarboxylic acid, 1,2-bis(2-oxiranylmethyl) ester	39.9628	-82.9958	739266	5493-45-8	5493458	CASRN	Hexion Holdings Corp	180 E Broad St		Columbus	Franklin	OH	43215	11-733-1984									HEXION INC.	180 EAST BROAD ST		COLUMBUS	FRANKLIN COUNTY	OH	43215	00-133-8797	TSCA123204	110070000000	325998 All Other Miscellaneous Chemical Product And Preparation Manufacturing	Import					Import	CBI	CBI	CBI	CBI	CBI	CBI	1,000,000 ‚Äì <10,000,000	1,000,000 ‚Äì <20,000,000	1,000,000 ‚Äì <20,000,000	1,000,000 ‚Äì <20,000,000
1,2-Cyclohexanedicarboxylic acid, 1,2-bis(2-oxiranylmethyl) ester	40.5398	-81.4944	713259	5493-45-8	5493458	CASRN	ICC Industries LLC	725 Fifth Ave 14th floor		New York	Manhattan	NY	10022	04-617-7341									DOVER CHEMICAL CORP	3676 DAVIS ROAD NORTH WEST		DOVER	TUSCARAWAS	OH	44622-9771	00-421-0563	TSCA6431	110001000000	325199 All Other Basic Organic Chemical Manufacturing						Manufacture	96000	0	96000	26000	40000	140000	1,000,000 ‚Äì <10,000,000	1,000,000 ‚Äì <20,000,000	1,000,000 ‚Äì <20,000,000	1,000,000 ‚Äì <20,000,000
1,2-Cyclohexanedicarboxylic acid, 1,2-bis(2-oxiranylmethyl) ester	40.7625	-73.9743	702957	5493-45-8	5493458	CASRN	ICC Industries Inc.	725 Fifth Avenue	14th Floor	New York	New York	NY	10022	04-617-7341									ICC CHEMICAL CORP	725 5TH AVE		NEW YORK	NEW YORK COUNTY	NY	10022	19-281-3111	TSCA10058156	110071000000	424690 Other Chemical And Allied Products Merchant Wholesalers	Import					Import	CBI	CBI	CBI	CBI	CBI	CBI	1,000,000 ‚Äì <10,000,000	1,000,000 ‚Äì <20,000,000	1,000,000 ‚Äì <20,000,000	1,000,000 ‚Äì <20,000,000
1,2-Cyclohexanedicarboxylic acid, 1,2-bis(2-oxiranylmethyl) ester	45.6109	-122.5	710715	5493-45-8	5493458	CASRN	EMERALD PERFORMANCE MATERIALS LLC	1499 SE TECH CENTER PLACE, SUITE 300		VANCOUVER	Clark	WA	98683	61-938-5586									EMERALD PERFORMANCE MATERIALS LLC	1499 SE TECH CENTER PL	SUITE 300	VANCOUVER	CLARK COUNTY	WA	98683	61-938-5586	TSCA10054900	110071000000	325199 All Other Basic Organic Chemical Manufacturing	Withheld					CBI	CBI	CBI	CBI	CBI	CBI	CBI	1,000,000 ‚Äì <10,000,000	1,000,000 ‚Äì <20,000,000	1,000,000 ‚Äì <20,000,000	1,000,000 ‚Äì <20,000,000
1,2-Cyclohexanedicarboxylic acid, 1,2-dinonyl ester, branched and linear	33.8243	-118.238	703812	474919-59-0	474919590	CASRN	POLYONE CORPORATION	33587 WALKER ROAD		AVON LAKE	Lorain	OH	44012	84-508-2861									POLYONE CORP	2104 EAST 223RD STREET		CARSON	LOS ANGELES	CA	90745	03-906-4142	100607533	110000000000	325510 Paint And Coating Manufacturing	Import					Import	0	187929	187929	0	0	0	1,000,000 ‚Äì <20,000,000	1,000,000 ‚Äì <20,000,000	1,000,000 ‚Äì <20,000,000	1,000,000 ‚Äì <20,000,000
1,2-Cyclohexanedicarboxylic acid, 1,2-dinonyl ester, branched and linear	36.0872	-95.8406	725992	474919-59-0	474919590	CASRN	HILTI INC	7250 Dallas Pkwy		Plano	collin	TX	75024	00-117-3525									HILTI INC	5400 S. 122ND E. AVE.		TULSA	TULSA COUNTY	OK	74146-6099	00-117-3525	TSCA8921	110000000000	423710 Hardware Merchant Wholesalers	Import					Import	CBI	CBI	CBI	CBI	CBI	CBI	1,000,000 ‚Äì <20,000,000	1,000,000 ‚Äì <20,000,000	1,000,000 ‚Äì <20,000,000	1,000,000 ‚Äì <20,000,000
1,2-Cyclohexanedicarboxylic acid, 1,2-dinonyl ester, branched and linear	39.7662	-104.817	733270	474919-59-0	474919590	CASRN	Uzin Utz	14509 East 33rd Place Unit G		Aurora	CO	CO	80011	14-509-3380									UZIN UTZ NORTH AMERICA	14509 E 33RD PL		AURORA	ADAMS COUNTY	CO	80011	86-117-4608	TSCA10049412	110071000000	423320 Brick, Stone, And Related Construction Material Merchant Wholesalers	Manufacture					Import	0	27619	27619	0	0	0	1,000,000 ‚Äì <20,000,000	1,000,000 ‚Äì <20,000,000	1,000,000 ‚Äì <20,000,000	1,000,000 ‚Äì <20,000,000
1,2-Cyclohexanedicarboxylic acid, 1,2-dinonyl ester, branched and linear	39.8969	-75.2334	710079	474919-59-0	474919590	CASRN	Akdeniz Chemson Additives Inc.	7825 HOLSTEIN AVE		PHILADELPHIA	Philadelphia	PA	19153	79-432-9532									AKDENIZ CHEMSON ADDITIVES INC.	7825 HOLSTEIN AVE		PHILADELPHIA	PHILADELPHIA COUNTY	PA	19153	79-432-9532	100605214	110014000000	325998 All Other Miscellaneous Chemical Product And Preparation Manufacturing	Both					Import	0	105515	105515	25596	0	0	1,000,000 ‚Äì <20,000,000	1,000,000 ‚Äì <20,000,000	1,000,000 ‚Äì <20,000,000	1,000,000 ‚Äì <20,000,000
1,2-Cyclohexanedicarboxylic acid, 1,2-dinonyl ester, branched and linear	40.7625	-73.9743	702953	474919-59-0	474919590	CASRN	ICC Industries Inc.	725 Fifth Avenue	14th Floor	New York	New York	NY	10022	04-617-7341									ICC CHEMICAL CORP	725 5TH AVE		NEW YORK	NEW YORK COUNTY	NY	10022	19-281-3111	TSCA10058156	110071000000	424690 Other Chemical And Allied Products Merchant Wholesalers	Import					Import	CBI	CBI	CBI	CBI	CBI	CBI	1,000,000 ‚Äì <20,000,000	1,000,000 ‚Äì <20,000,000	1,000,000 ‚Äì <20,000,000	1,000,000 ‚Äì <20,000,000
1,2-Cyclohexanedicarboxylic acid, 1,2-dinonyl ester, branched and linear	40.7734	-74.4261	726806	474919-59-0	474919590	CASRN	BASF Corporation	100 Park Avenue		Florham Park	NJ	MI	7932	00-130-7032	BASF SE	Carl-Bosch Strasse 38		Ludwigshafen		60756	GM	31-500-0554	BASF IMPORTS PART 1	100 PARK AVE		FLORHAM PARK	MORRIS COUNTY	NJ	7932	00-130-7032	TSCA130148	110070000000	325199 All Other Basic Organic Chemical Manufacturing	Import					Import	CBI	CBI	CBI	CBI	CBI	CBI	1,000,000 ‚Äì <20,000,000	1,000,000 ‚Äì <20,000,000	1,000,000 ‚Äì <20,000,000	1,000,000 ‚Äì <20,000,000
1,2-Cyclohexanedicarboxylic acid, 1,2-dinonyl ester, branched and linear	40.8047	-74.109	726082	474919-59-0	474919590	CASRN	SIKA CORPORATION	201 POLITO AVENUE		LYNDHURST	Bergen	NJ	7071	00-217-9893	SIKA AG	Zugerstrasse 50		Baar		6340	SZ	48-000-0538	SIKA CORP	201 POLITO AVE		LYNDHURST		NJ	7071	00-217-9893	200003869	110019000000	325520 Adhesive Manufacturing	Import					Import	CBI	CBI	CBI	CBI	CBI	CBI	1,000,000 ‚Äì <20,000,000	1,000,000 ‚Äì <20,000,000	1,000,000 ‚Äì <20,000,000	1,000,000 ‚Äì <20,000,000
1,2-Cyclohexanedicarboxylic acid, 1,2-dinonyl ester, branched and linear	40.855	-74.4142	701974	474919-59-0	474919590	CASRN	Evonik Corporation	299 Jefferson Rd		Parsippany	Morris	NJ	7054	79-153-3958									EVONIK CORPORATION	299 JEFFERSON ROAD		PARSIPPANY	MORRIS COUNTY	NJ	7054	79-153-3958	100605812	110057000000	325998 All Other Miscellaneous Chemical Product And Preparation Manufacturing	Both									CBI	CBI	CBI	1,000,000 ‚Äì <20,000,000	1,000,000 ‚Äì <20,000,000	1,000,000 ‚Äì <20,000,000	1,000,000 ‚Äì <20,000,000
1,2-Cyclohexanedicarboxylic acid, 1,2-dinonyl ester, branched and linear	40.9655	-81.4686	736303	474919-59-0	474919590	CASRN	ChemSpec, Ltd.	1559 Corporate Woods Parkway	Suite 150	Uniontown	Summit County	OH	44685	13-922-0284	SAFIC ALCAN	13 Cours Valmy	92977 Paris La Dfense Cedex	Paris			FR	13-922-0284	CHEMSPEC, LTD.	1559 CORPORATE WOODS PKWY	SUITE 150	UNIONTOWN	SUMMIT COUNTY	OH	44685	13-922-0284	TSCA115201	110069000000	424690 Other Chemical And Allied Products Merchant Wholesalers	Import						0	0	0	0	307099	16990	1,000,000 ‚Äì <20,000,000	1,000,000 ‚Äì <20,000,000	1,000,000 ‚Äì <20,000,000	1,000,000 ‚Äì <20,000,000
1,2-Cyclohexanedicarboxylic acid, 1,2-dinonyl ester, branched and linear	41.0611	-81.4725	717637	474919-59-0	474919590	CASRN	HARWICK STANDARD DISTRIBUTION CORPORATION	60 S. SEIBERLING STREET		AKRON	SUMMIT	OH	44305	05-724-7793									HARWICK STANDARD DISTRIBUTION CORP	60 S. SEIBERLING ST.		AKRON	SUMMIT COUNTY	OH	44305	05-724-7793	100603283	110000000000	424690 Other Chemical And Allied Products Merchant Wholesalers	Import					Import	0	392176	392176	261322	86949	0	1,000,000 ‚Äì <20,000,000	1,000,000 ‚Äì <20,000,000	1,000,000 ‚Äì <20,000,000	1,000,000 ‚Äì <20,000,000
1,2-Cyclohexanedicarboxylic acid, 1,2-dinonyl ester, branched and linear	41.3753	-82.1402	708687	474919-59-0	474919590	CASRN	POLYONE CORPORATION	33587 WALKER ROAD		AVON LAKE	Lorain	OH	44012	84-508-2861									Elyria Distribution Ctr.	1404 Lowell Street		Elyria		OH	44035	11-724-7947	TSCA6537	110057000000	424610 Plastics Materials And Basic Forms And Shapes Merchant Wholesalers	Import					Import	0	37586	37586	0	87328	0	1,000,000 ‚Äì <20,000,000	1,000,000 ‚Äì <20,000,000	1,000,000 ‚Äì <20,000,000	1,000,000 ‚Äì <20,000,000
1,2-Cyclohexanedicarboxylic acid, 1,2-dinonyl ester, branched and linear	41.4981	-81.6915	725692	474919-59-0	474919590	CASRN	The Sherwin Williams Company	101 Prospect Ave NW		Cleveland	Cuyahoga	OH	44115	00-420-6397									THE SHERWIN-WILLIAMS COMPANY	101 PROSPECT AVE. NW		CLEVELAND	CUYAHOGA COUNTY	OH	44115-1075	00-420-6397	200003830	110005000000	325510 Paint And Coating Manufacturing	Both	444120 Paint And Wallpaper Stores	Import			Import	CBI	CBI	CBI	CBI	CBI	CBI	1,000,000 ‚Äì <20,000,000	1,000,000 ‚Äì <20,000,000	1,000,000 ‚Äì <20,000,000	1,000,000 ‚Äì <20,000,000
1,2-Cyclohexanedicarboxylic acid, 1,2-dinonyl ester, branched and linear	42.3906	-83.5101	702750	474919-59-0	474919590	CASRN	Flint CPS Inks North America LLC	14909 Beck Road		Plymouth	Wayne	MI	48170	08-133-4733									FLINT CPS INKS NORTH AMERICA LLC	14909 N BECK RD		PLYMOUTH	WAYNE COUNTY	MI	48170	08-133-4733	TSCA6163	110036000000	325910 Printing Ink Manufacturing	Import					Import	CBI	CBI	CBI	CBI	CBI	CBI	1,000,000 ‚Äì <20,000,000	1,000,000 ‚Äì <20,000,000	1,000,000 ‚Äì <20,000,000	1,000,000 ‚Äì <20,000,000
1,2-Cyclohexanedicarboxylic acid, 1-(phenylmethyl) ester, ester with 2,2,4-trimethyl-1,3-pentanediol mono(2-methylpropanoate)	39.7942	-75.3967	727413	1661012-65-2	1661012652	CASRN	Valtris	7500 East Pleasant Valley		Independence	cuyahoga	OH	44131	07-979-5537									POLYMER ADDITIVES, INC.	170 ROUTE 130 SOUTH		BRIDGEPORT	GLOUCESTER COUNTY	NJ	8014	07-971-0078	TSCA95283	110001000000	325199 All Other Basic Organic Chemical Manufacturing	Both					Manufacture	CBI	CBI	CBI	CBI	CBI	CBI	<1,000,000	<1,000,000	<1,000,000	<1,000,000
1,2-Cyclohexanedicarboxylic acid, 1-butyl 2-(phenylmethyl) ester	39.7942	-75.3967	727408	1200806-67-2	1200806672	CASRN	Valtris	7500 East Pleasant Valley		Independence	cuyahoga	OH	44131	07-979-5537									POLYMER ADDITIVES, INC.	170 ROUTE 130 SOUTH		BRIDGEPORT	GLOUCESTER COUNTY	NJ	8014	07-971-0078	TSCA95283	110001000000	325199 All Other Basic Organic Chemical Manufacturing	Both					Manufacture	CBI	CBI	CBI	CBI	CBI	CBI	1,000,000 ‚Äì <20,000,000	1,000,000 ‚Äì <20,000,000	1,000,000 ‚Äì <20,000,000	1,000,000 ‚Äì <20,000,000
1,2-Cyclopentanedione, 3-methyl-	40.9927	-73.9539	709336	765-70-8	765708	CASRN	Phoenix Aromas & Essential Oils	355 Chestnut Street		Norwood	Bergen	NJ	7648	96-707-7087									PHOENIX AROMAS & ESSENTIAL OILS	355 CHESTNUT ST		NORWOOD	BERGEN COUNTY	NJ	7648	96-707-7087	TSCA10018842	110070000000	311930 Flavoring Syrup And Concentrate Manufacturing	Both	493190 Other Warehousing And Storage	Both	325998 All Other Miscellaneous Chemical Product And Preparation Manufacturing	Both	Import	0	103176	103176	90389	97003	79366	103176	90389	97003	79366
1,2-Diazenedicarboxamide	33.2349	-84.2137	741451	123-77-3	123773	CASRN	Otsuka Chemical America, Inc.	100 The Lakes Parkway		Griffin	Spalding	GA	30224	07-977-1777	OTSUKA CHEMICAL CO	3-2-27, Ote-Dori,		Chuo-Ku		540-0021	JA	69-890-0458	OTSUKA CHEMICAL AMERICA INC.	100 THE LAKES PARKWAY		GRIFFIN	SPALDING COUNTY	GA	30224	07-977-1777	TSCA115896	110069000000	325998 All Other Miscellaneous Chemical Product And Preparation Manufacturing	Both					Import	0	197038	197038	112594	168890	0	1,000,000 ‚Äì <10,000,000	1,000,000 ‚Äì <10,000,000	1,000,000 ‚Äì <10,000,000	1,000,000 ‚Äì <20,000,000
1,2-Diazenedicarboxamide	34.4251	-84.9227	712910	123-77-3	123773	CASRN	LG HAUSY AMERICA, INC.	310 LG DRIVE		ADAIRSVILLE	BARTOW	GA	30103	14-912-0367									LG HAUSYS AMERICA INC	310 LG DR SE		ADAIRSVILLE	BARTOW	GA	30103	14-912-0367	TSCA124002	110023000000	325211 Plastics Material And Resin Manufacturing	Import					Import	0	29768	29768	28731	16538	0	1,000,000 ‚Äì <10,000,000	1,000,000 ‚Äì <10,000,000	1,000,000 ‚Äì <10,000,000	1,000,000 ‚Äì <20,000,000
1,2-Diazenedicarboxamide	34.7171	-84.9453	707939	123-77-3	123773	CASRN	MOHAWK INDUSTRIES INC	160 S Industrial Blvd		Calhoun	Gordon	GA	30701	61-275-7070									IVC US	101 IVC DR		DALTON	WHITFIELD	GA	30721	16-528-6738	TSCA10054593	110064000000	326192 Resilient Floor Covering Manufacturing	Import					Import	0	396000	396000	360000	360000	0	1,000,000 ‚Äì <10,000,000	1,000,000 ‚Äì <10,000,000	1,000,000 ‚Äì <10,000,000	1,000,000 ‚Äì <20,000,000
1,2-Diazenedicarboxamide	35.1968	-80.7934	723092	123-77-3	123773	CASRN	Clariant Corporation	4000 Monroe Rd		Charlotte	Mecklenburg	NC	28205	10-870-6425	CLARIANT INTERNATIONAL LTD	Rothausstrasse 61	CH 4132	Muttenz			SZ	48-237-6084	CLARIANT PLASTICS & COATINGS USA LLC	4000 MONROE RD		CHARLOTTE	MECKLENBURG COUNTY	NC	28205	19-480-0793	TSCA10036911	110069000000	325130 Synthetic Dye And Pigment Manufacturing	Withheld	325991 Custom Compounding Of Purchased Resins	Withheld			CBI	CBI	CBI	CBI	CBI	CBI	CBI	1,000,000 ‚Äì <10,000,000	1,000,000 ‚Äì <10,000,000	1,000,000 ‚Äì <10,000,000	1,000,000 ‚Äì <20,000,000
1,2-Diazenedicarboxamide	39.266	-93.9771	709504	123-77-3	123773	CASRN	HENKEL CORPORATION	1 HENKEL WAY		ROCKY HILL	Hartford	CT	6067	08-088-7708									HENKEL RICHMOND MO	201 E HIGHWAY 10		RICHMOND	RAY COUNTY	MO	64085	80-784-9687	TSCA121464	110069000000	325520 Adhesive Manufacturing	Import					Import	0	27683	27683	8647	13774	8812	1,000,000 ‚Äì <10,000,000	1,000,000 ‚Äì <10,000,000	1,000,000 ‚Äì <10,000,000	1,000,000 ‚Äì <20,000,000
1,2-Diazenedicarboxamide	39.8274	-75.4143	728764	123-77-3	123773	CASRN	Congoleum Acquisitions, LLC	3500 Quakerbridge ROAD		Mercerville	Mercer	NJ	8619	15-428-1158									CONGOLEUM CORP PLANT 3	4401 RIDGE ROAD		MARCUS HOOK	DELAWARE	PA	19061-5000	15-428-1158	100605354	110001000000	326192 Resilient Floor Covering Manufacturing	Manufacture					Import	0	110810	110810	127785	122687	107142	1,000,000 ‚Äì <10,000,000	1,000,000 ‚Äì <10,000,000	1,000,000 ‚Äì <10,000,000	1,000,000 ‚Äì <20,000,000
1,2-Diazenedicarboxamide	40.7486	-73.9855	705263	123-77-3	123773	CASRN	ALAC International Inc	350 Fifth Avenue	Suite 3015	New York	New York	NY	10118	36-282-4687									ALAC INTERNATIONAL INC.	350 5TH AVE		NEW YORK	NEW YORK COUNTY	NY	10118	36-282-4687	TSCA10050149	110071000000	424610 Plastics Materials And Basic Forms And Shapes Merchant Wholesalers	Import					Import	0	118800	118800	221980	173008	221716	1,000,000 ‚Äì <10,000,000	1,000,000 ‚Äì <10,000,000	1,000,000 ‚Äì <10,000,000	1,000,000 ‚Äì <20,000,000
1,2-Diazenedicarboxamide	40.7504	-73.9747	706205	123-77-3	123773	CASRN	Mitsubishi Gas Chemical	655 Third Avenue	24th Floor	New York	New York	NY	10017	17-511-4909									HEAD OFFICE	655 3RD AVE		NEW YORK	NEW YORK COUNTY	NY	10017	17-511-4909	TSCA10020555	110070000000	339999 All Other Miscellaneous Manufacturing	Import					Import	CBI	CBI	CBI	CBI	CBI	CBI	1,000,000 ‚Äì <10,000,000	1,000,000 ‚Äì <10,000,000	1,000,000 ‚Äì <10,000,000	1,000,000 ‚Äì <20,000,000
1,2-Diazenedicarboxamide	40.8047	-74.109	726056	123-77-3	123773	CASRN	SIKA CORPORATION	201 POLITO AVENUE		LYNDHURST	Bergen	NJ	7071	00-217-9893	SIKA AG	Zugerstrasse 50		Baar		6340	SZ	48-000-0538	SIKA CORP	201 POLITO AVE		LYNDHURST		NJ	7071	00-217-9893	200003869	110019000000	325520 Adhesive Manufacturing	Import					Import	CBI	CBI	CBI	CBI	CBI	CBI	1,000,000 ‚Äì <10,000,000	1,000,000 ‚Äì <10,000,000	1,000,000 ‚Äì <10,000,000	1,000,000 ‚Äì <20,000,000
1,2-Diazenedicarboxamide	41.3841	-81.8562	728683	123-77-3	123773	CASRN	POLYONE CORPORATION	33587 WALKER ROAD		AVON LAKE	Lorain	OH	44012	84-508-2861									COLORMATRIX	680 N ROCKY RIVER DR		BEREA	CUYAHOGA COUNTY	OH	44017	02-558-6207	TSCA128386	110070000000	325991 Custom Compounding Of Purchased Resins	Import									0	79366	98105	1,000,000 ‚Äì <10,000,000	1,000,000 ‚Äì <10,000,000	1,000,000 ‚Äì <10,000,000	1,000,000 ‚Äì <20,000,000
1,2-Diazenedicarboxylic acid, 1,2-bis(phenylmethyl) ester	43.1838	-78.6975	725885	2449-05-0	2449050	CASRN	VANDEMARK CHEMICAL	1 NORTH TRANSIT RD.		LOCKPORT	Niagara County	NY	14094	00-211-6192									VANDEMARK CHEMICAL INC	1 NORTH TRANSIT ROAD		LOCKPORT	NIAGARA	NY	14094-2323	00-211-6192	TSCA7753	110000000000	325199 All Other Basic Organic Chemical Manufacturing	Manufacture					Manufacture	48831	0	48831	21495	49950	0	48831	21495	49950	0
1,2-Ethanediamine	28.9663	-95.4194	737662	107-15-3	107153	CASRN	HUNTSMAN INTERNATIONAL LLC	10003 Woodloch Forest Dr		THE WOODLANDS	Montgomery	TX	77380	96-864-2079									HUNTSMAN ETHYLENEAMINES PLANT	307 COUNTY ROAD 624		FREEPORT	BRAZORIA	TX	77541	01-997-3705	100606420	110012000000	325199 All Other Basic Organic Chemical Manufacturing	Manufacture					Manufacture	CBI	0	CBI	CBI	CBI	CBI	100,000,000 ‚Äì <1,000,000,000	100,000,000 ‚Äì <250,000,000	100,000,000 ‚Äì <1,000,000,000	100,000,000 ‚Äì <1,000,000,000
1,2-Ethanediamine	29.6535	-82.4068	700607	107-15-3	107153	CASRN	ALLCHEM INDUSTRIES HOLDING CORP	6010 NW FIRST PLACE		GAINESVILLE	Alachua	FL	32607	05-945-5423									ALLCHEM INDUSTRIES INDUSTRIAL CHEMICALS GROUP, INC	6010 NW 1ST PL		GAINESVILLE	ALACHUA COUNTY	FL	32607	11-120-7127	TSCA110582	110069000000	424690 Other Chemical And Allied Products Merchant Wholesalers	Import					Import	0	31760	31760	0	0	0	100,000,000 ‚Äì <1,000,000,000	100,000,000 ‚Äì <250,000,000	100,000,000 ‚Äì <1,000,000,000	100,000,000 ‚Äì <1,000,000,000
1,2-Ethanediamine	29.9843	-90.4551	734912	107-15-3	107153	CASRN	The Dow Chemical Co	2211 H.H. Dow Way		Midland	Midland	MI	48674	08-036-1339									UNION CARBIDE CORP - ST CHARLES OPERATIONS	HWY 3142 &AMP; 18		HAHNVILLE	SAINT CHARLES	LA	70057	80-103-8019	100608442	110001000000	325199 All Other Basic Organic Chemical Manufacturing	Manufacture	325211 Plastics Material And Resin Manufacturing	Manufacture			Manufacture	CBI	0	CBI	CBI	CBI	CBI	100,000,000 ‚Äì <1,000,000,000	100,000,000 ‚Äì <250,000,000	100,000,000 ‚Äì <1,000,000,000	100,000,000 ‚Äì <1,000,000,000
1,2-Ethanediamine	34.1024	-84.2408	738280	107-15-3	107153	CASRN	Tosoh Specialty Chemicals USA, Inc.	1720 Windward Concourse	Suite 125	Alpharetta	United States	GA	30005	80-981-0059									TOSOH SPECIALTY CHEMICALS	1720 WINDWARD CON	SUITE 125	ALPHARETTA	FORSYTH COUNTY	GA	30005	80-981-0059	TSCA118181	110057000000	424690 Other Chemical And Allied Products Merchant Wholesalers	Import					Import	CBI	CBI	CBI	CBI	CBI	CBI	100,000,000 ‚Äì <1,000,000,000	100,000,000 ‚Äì <250,000,000	100,000,000 ‚Äì <1,000,000,000	100,000,000 ‚Äì <1,000,000,000
1,2-Ethanediamine	35.8627	-80.0763	731002	107-15-3	107153	CASRN	HARCROS CHEMICALS	5200 SPEAKER ROAD		KANSAS CITY	Wyandotte	KS	66106	08-016-6983									HARCROS CHEMICALS INC. - THOMASVILLE	125 SEDGEHILL DRIVE		THOMASVILLE	DAVIDSON	NC	27360-5732	04-141-4756	TSCA10057217	110008000000	424690 Other Chemical And Allied Products Merchant Wholesalers	Import					Import	0	7940	7940	38112	0	0	100,000,000 ‚Äì <1,000,000,000	100,000,000 ‚Äì <250,000,000	100,000,000 ‚Äì <1,000,000,000	100,000,000 ‚Äì <1,000,000,000
1,2-Ethanediamine	38.0259	-122.116	722251	107-15-3	107153	CASRN	Shell Catalysts & Technologies LP	3333 Hwy 6 South		Houston	Harris	TX	77082	11-714-2058	ROYAL DUTCH SHELL PLC	Shell Centre		London		SE17 NA	UK	42-379-2808	SHELL CATALYSTS & TECHNOLOGIES LP - MARTINEZ	10 MOCOCO RD		MARTINEZ	CONTRA COSTA COUNTY	CA	94553	08-369-7081	100607914	110000000000	325188 All Other Basic Inorganic Chemical Manufacturing	Both					Manufacture	CBI	0	CBI	CBI	CBI	CBI	100,000,000 ‚Äì <1,000,000,000	100,000,000 ‚Äì <250,000,000	100,000,000 ‚Äì <1,000,000,000	100,000,000 ‚Äì <1,000,000,000
1,2-Ethanediamine	40.7734	-74.4261	726418	107-15-3	107153	CASRN	BASF Corporation	100 Park Avenue		Florham Park	NJ	MI	7932	00-130-7032	BASF SE	Carl-Bosch Strasse 38		Ludwigshafen		60756	GM	31-500-0554	BASF IMPORTS PART 1	100 PARK AVE		FLORHAM PARK	MORRIS COUNTY	NJ	7932	00-130-7032	TSCA130148	110070000000	325199 All Other Basic Organic Chemical Manufacturing	Import					Import	CBI	CBI	CBI	12953520	11813720	2249316	100,000,000 ‚Äì <1,000,000,000	100,000,000 ‚Äì <250,000,000	100,000,000 ‚Äì <1,000,000,000	100,000,000 ‚Äì <1,000,000,000
1,2-Ethanediamine	41.3596	-73.633	700335	107-15-3	107153	CASRN	NOURYON FUNCTIONAL CHEMICALS LLC	131 S. DEARBORN ST	SUITE 1000	CHICAGO	Cook	IL	60603	11-713-4378									NOURYON FUNCTIONAL CHEMICALS LLC	281 FIELDS LN.		BREWSTER	PUTNAM COUNTY	NY	10509	07-972-2077	TSCA5268	110060000000	325199 All Other Basic Organic Chemical Manufacturing	Import					Import	CBI	CBI	CBI	CBI	CBI	CBI	100,000,000 ‚Äì <1,000,000,000	100,000,000 ‚Äì <250,000,000	100,000,000 ‚Äì <1,000,000,000	100,000,000 ‚Äì <1,000,000,000
1,2-Ethanediamine, N-[3-(dimethoxymethylsilyl)-2-methylpropyl]-	43.6003	-84.2234	738514	23410-40-4	23410404	CASRN	The Dow Chemical Co	2211 H.H. Dow Way		Midland	Midland	MI	48674	08-036-1339									THE DOW CHEMICAL COMPANY	1790 BUILDING WASHINGTON ST.		MIDLAND		MI	48667	16-130-4001	TSCA4102	110044000000	325199 All Other Basic Organic Chemical Manufacturing	Manufacture	325320 Pesticide And Other Agricultural Chemical Manufacturing	Manufacture	325211 Plastics Material And Resin Manufacturing	Manufacture	Manufacture	CBI	0	CBI	CBI	CBI	CBI	<1,000,000	<1,000,000	<1,000,000	<1,000,000
1,2-Ethanediamine, N1,N1,N2,N2-tetramethyl-	33.8193	-84.5005	712679	110-18-9	110189	CASRN	Italmatch USA Corporation	5544 Oakdale Road SE		Smyrna	Cobb	GA	30082	07-909-7066	ITALMATCH CHEMICALS SPA	VIA MAGAZZINI DEL COTONE 17		GENOVA		16128	IT	56-513-2532	ITALMATCH USA CORPORATION	5544 OAKDALE ROAD SE		SMYRNA	COBB COUNTY	GA	30082	07-909-7066	TSCA10068759	110071000000	325180 Other Basic Inorganic Chemical Manufacturing	Import	325199 All Other Basic Organic Chemical Manufacturing	Import			Import	0	260000	260000	84657	395064	0	4470434	4169476	3871437	2774998
1,2-Ethanediamine, N1,N1,N2,N2-tetramethyl-	37.9834	-90.6908	734227	110-18-9	110189	CASRN	Buckman Laboratories, Inc	1256 N. McLean Blvd		Memphis	Shelby	TN	38108	18-895-3434									BUCKMAN LABORATORIES INCORPORATED	14664 E STATE HIGHWAY 47		CADET	WASHINGTON COUNTY	MO	63630	18-895-3434	TSCA4466	110018000000	325998 All Other Miscellaneous Chemical Product And Preparation Manufacturing	Manufacture					Manufacture	4210434	0	4210434	4066476	3370535	2774998	4470434	4169476	3871437	2774998
1,2-Ethanediamine, N1,N1,N2,N2-tetramethyl-	42.9959	-85.6789	718391	110-18-9	110189	CASRN	HAVILAND ENTERPRISES, INC.	421 ANN STREET NW		GRAND RAPIDS	Kent	MI	49504	06-017-4364									HAVILAND ENTERPRISES, INC.	421 ANN ST NW		GRAND RAPIDS	KENT	MI	49504-2075	06-017-4364	TSCA120822	110004000000	325998 All Other Miscellaneous Chemical Product And Preparation Manufacturing	Both									18343	105838	0	4470434	4169476	3871437	2774998
1,2-Ethanediamine, N1,N2-bis(1,3-dimethylbutylidene)-	34.0127	-118.213	705778	25707-70-4	25707704	CASRN	Evonik Corporation	299 Jefferson Rd		Parsippany	Morris	NJ	7054	79-153-3958									EVONIK CORPORATION	3305 E 26TH ST		LOS ANGELES	LOS ANGELES COUNTY	CA	90058	09-642-7299	TSCA10005463	110070000000	325998 All Other Miscellaneous Chemical Product And Preparation Manufacturing										CBI	CBI	CBI	0	<1,000,000	<1,000,000	<1,000,000
1,2-Ethanediamine, N1,N2-bis(2-aminoethyl)-	27.8944	-81.9321	711065	112-24-3	112243	CASRN	Arkema Delaware Inc.	900 First Ave		King of Prussia	Montgomery	PA	19406	62-212-1697	ARKEMA	420 Rue d'Estienne d'Orves	92700	Colombes			FR	26-687-3780	ARRMAZ PRODUCTS INC.	4800 STATE ROAD 60 E		MULBERRY	POLK COUNTY	FL	33860	09-298-3139	TSCA10066459	110000000000	325199 All Other Basic Organic Chemical Manufacturing	Withheld	325613 Surface Active Agent Manufacturing	Withheld			CBI	CBI	CBI	CBI	CBI	CBI	CBI	10,000,000 ‚Äì <50,000,000	10,000,000 ‚Äì <50,000,000	10,000,000 ‚Äì <50,000,000	10,000,000 ‚Äì <50,000,000
1,2-Ethanediamine, N1,N2-bis(2-aminoethyl)-	28.9663	-95.4194	737666	112-24-3	112243	CASRN	HUNTSMAN INTERNATIONAL LLC	10003 Woodloch Forest Dr		THE WOODLANDS	Montgomery	TX	77380	96-864-2079									HUNTSMAN ETHYLENEAMINES PLANT	307 COUNTY ROAD 624		FREEPORT	BRAZORIA	TX	77541	01-997-3705	100606420	110012000000	325199 All Other Basic Organic Chemical Manufacturing	Manufacture					Manufacture	CBI	0	CBI	CBI	CBI	CBI	10,000,000 ‚Äì <50,000,000	10,000,000 ‚Äì <50,000,000	10,000,000 ‚Äì <50,000,000	10,000,000 ‚Äì <50,000,000
1,2-Ethanediamine, N1,N2-bis(2-aminoethyl)-	29.7131	-95.1946	705983	112-24-3	112243	CASRN	Evonik Corporation	299 Jefferson Rd		Parsippany	Morris	NJ	7054	79-153-3958									EVONIK CORPORATION	1423 PASADENA FWY		PASADENA	HARRIS COUNTY	TX	77506	06-509-1969	TSCA10055615	110071000000	325199 All Other Basic Organic Chemical Manufacturing										CBI	CBI	CBI	10,000,000 ‚Äì <50,000,000	10,000,000 ‚Äì <50,000,000	10,000,000 ‚Äì <50,000,000	10,000,000 ‚Äì <50,000,000
1,2-Ethanediamine, N1,N2-bis(2-aminoethyl)-	29.9843	-90.4551	734918	112-24-3	112243	CASRN	The Dow Chemical Co	2211 H.H. Dow Way		Midland	Midland	MI	48674	08-036-1339									UNION CARBIDE CORP - ST CHARLES OPERATIONS	HWY 3142 &AMP; 18		HAHNVILLE	SAINT CHARLES	LA	70057	80-103-8019	100608442	110001000000	325199 All Other Basic Organic Chemical Manufacturing	Manufacture	325211 Plastics Material And Resin Manufacturing	Manufacture			Manufacture	CBI	0	CBI	CBI	CBI	CBI	10,000,000 ‚Äì <50,000,000	10,000,000 ‚Äì <50,000,000	10,000,000 ‚Äì <50,000,000	10,000,000 ‚Äì <50,000,000
1,2-Ethanediamine, N1,N2-bis(2-aminoethyl)-	34.1024	-84.2408	738284	112-24-3	112243	CASRN	Tosoh Specialty Chemicals USA, Inc.	1720 Windward Concourse	Suite 125	Alpharetta	United States	GA	30005	80-981-0059									TOSOH SPECIALTY CHEMICALS	1720 WINDWARD CON	SUITE 125	ALPHARETTA	FORSYTH COUNTY	GA	30005	80-981-0059	TSCA118181	110057000000	424690 Other Chemical And Allied Products Merchant Wholesalers	Import					Import	CBI	CBI	CBI	CBI	CBI	CBI	10,000,000 ‚Äì <50,000,000	10,000,000 ‚Äì <50,000,000	10,000,000 ‚Äì <50,000,000	10,000,000 ‚Äì <50,000,000
1,2-Ethanediamine, N1,N2-bis(2-aminoethyl)-	39.9628	-82.9958	739237	112-24-3	112243	CASRN	Hexion Holdings Corp	180 E Broad St		Columbus	Franklin	OH	43215	11-733-1984									HEXION INC.	180 EAST BROAD ST		COLUMBUS	FRANKLIN COUNTY	OH	43215	00-133-8797	TSCA123204	110070000000	325998 All Other Miscellaneous Chemical Product And Preparation Manufacturing	Import					Import	CBI	CBI	CBI	CBI	CBI	CBI	10,000,000 ‚Äì <50,000,000	10,000,000 ‚Äì <50,000,000	10,000,000 ‚Äì <50,000,000	10,000,000 ‚Äì <50,000,000
1,2-Ethanediamine, N1,N2-bis(2-aminoethyl)-	40.8047	-74.109	726054	112-24-3	112243	CASRN	SIKA CORPORATION	201 POLITO AVENUE		LYNDHURST	Bergen	NJ	7071	00-217-9893	SIKA AG	Zugerstrasse 50		Baar		6340	SZ	48-000-0538	SIKA CORP	201 POLITO AVE		LYNDHURST		NJ	7071	00-217-9893	200003869	110019000000	325520 Adhesive Manufacturing	Import					Import	CBI	CBI	CBI	CBI	CBI	CBI	10,000,000 ‚Äì <50,000,000	10,000,000 ‚Äì <50,000,000	10,000,000 ‚Äì <50,000,000	10,000,000 ‚Äì <50,000,000
1,2-Ethanediamine, N1,N2-bis(2-aminoethyl)-	40.855	-74.4142	701868	112-24-3	112243	CASRN	Evonik Corporation	299 Jefferson Rd		Parsippany	Morris	NJ	7054	79-153-3958									EVONIK CORPORATION	299 JEFFERSON ROAD		PARSIPPANY	MORRIS COUNTY	NJ	7054	79-153-3958	100605812	110057000000	325998 All Other Miscellaneous Chemical Product And Preparation Manufacturing	Both					Import	CBI	CBI	CBI	CBI	CBI	CBI	10,000,000 ‚Äì <50,000,000	10,000,000 ‚Äì <50,000,000	10,000,000 ‚Äì <50,000,000	10,000,000 ‚Äì <50,000,000
1,2-Ethanediamine, N1,N2-bis(2-aminoethyl)-	41.3596	-73.633	700339	112-24-3	112243	CASRN	NOURYON FUNCTIONAL CHEMICALS LLC	131 S. DEARBORN ST	SUITE 1000	CHICAGO	Cook	IL	60603	11-713-4378									NOURYON FUNCTIONAL CHEMICALS LLC	281 FIELDS LN.		BREWSTER	PUTNAM COUNTY	NY	10509	07-972-2077	TSCA5268	110060000000	325199 All Other Basic Organic Chemical Manufacturing	Withheld					CBI	CBI	CBI	CBI	CBI	CBI	CBI	10,000,000 ‚Äì <50,000,000	10,000,000 ‚Äì <50,000,000	10,000,000 ‚Äì <50,000,000	10,000,000 ‚Äì <50,000,000
1,2-Ethanediamine, N1,N2-bis(2-aminoethyl)-	43.615	-84.1987	737946	112-24-3	112243	CASRN	The Dow Chemical Co	2211 H.H. Dow Way		Midland	Midland	MI	48674	08-036-1339									THE DOW CHEMICAL CO	2211 H.H. DOW WAY		MIDLAND	MIDLAND COUNTY	MI	48674	08-036-1339	TSCA10057799	110071000000	325199 All Other Basic Organic Chemical Manufacturing	Import	325211 Plastics Material And Resin Manufacturing	Import			Import	CBI	CBI	CBI	CBI	CBI	CBI	10,000,000 ‚Äì <50,000,000	10,000,000 ‚Äì <50,000,000	10,000,000 ‚Äì <50,000,000	10,000,000 ‚Äì <50,000,000
1,2-Ethanediamine, N1-(1,3-dimethylbutylidene)-N2-[2-[(1,3-dimethylbutylidene)amino]ethyl]-	34.0127	-118.213	705772	10595-60-5	10595605	CASRN	Evonik Corporation	299 Jefferson Rd		Parsippany	Morris	NJ	7054	79-153-3958									EVONIK CORPORATION	3305 E 26TH ST		LOS ANGELES	LOS ANGELES COUNTY	CA	90058	09-642-7299	TSCA10005463	110070000000	325998 All Other Miscellaneous Chemical Product And Preparation Manufacturing						Manufacture	CBI	0	CBI	CBI	CBI	CBI	1,000,000 ‚Äì <10,000,000	1,000,000 ‚Äì <10,000,000	1,000,000 ‚Äì <10,000,000	1,000,000 ‚Äì <10,000,000
1,2-Ethanediamine, N1-(2-aminoethyl)-	28.9663	-95.4194	737664	111-40-0	111400	CASRN	HUNTSMAN INTERNATIONAL LLC	10003 Woodloch Forest Dr		THE WOODLANDS	Montgomery	TX	77380	96-864-2079									HUNTSMAN ETHYLENEAMINES PLANT	307 COUNTY ROAD 624		FREEPORT	BRAZORIA	TX	77541	01-997-3705	100606420	110012000000	325199 All Other Basic Organic Chemical Manufacturing	Manufacture					Manufacture	CBI	0	CBI	CBI	CBI	CBI	100,000,000 ‚Äì <250,000,000	100,000,000 ‚Äì <250,000,000	100,000,000 ‚Äì <250,000,000	50,000,000 ‚Äì <100,000,000
1,2-Ethanediamine, N1-(2-aminoethyl)-	29.7131	-95.1946	705982	111-40-0	111400	CASRN	Evonik Corporation	299 Jefferson Rd		Parsippany	Morris	NJ	7054	79-153-3958									EVONIK CORPORATION	1423 PASADENA FWY		PASADENA	HARRIS COUNTY	TX	77506	06-509-1969	TSCA10055615	110071000000	325199 All Other Basic Organic Chemical Manufacturing						CBI	CBI	CBI	CBI	CBI	CBI	CBI	100,000,000 ‚Äì <250,000,000	100,000,000 ‚Äì <250,000,000	100,000,000 ‚Äì <250,000,000	50,000,000 ‚Äì <100,000,000
1,2-Ethanediamine, N1-(2-aminoethyl)-	29.9843	-90.4551	734914	111-40-0	111400	CASRN	The Dow Chemical Co	2211 H.H. Dow Way		Midland	Midland	MI	48674	08-036-1339									UNION CARBIDE CORP - ST CHARLES OPERATIONS	HWY 3142 &AMP; 18		HAHNVILLE	SAINT CHARLES	LA	70057	80-103-8019	100608442	110001000000	325199 All Other Basic Organic Chemical Manufacturing	Manufacture	325211 Plastics Material And Resin Manufacturing	Manufacture			Manufacture	CBI	0	CBI	CBI	CBI	CBI	100,000,000 ‚Äì <250,000,000	100,000,000 ‚Äì <250,000,000	100,000,000 ‚Äì <250,000,000	50,000,000 ‚Äì <100,000,000
1,2-Ethanediamine, N1-(2-aminoethyl)-	30.1604	-95.4559	701427	111-40-0	111400	CASRN	HUNTSMAN INTERNATIONAL LLC	10003 Woodloch Forest Dr		THE WOODLANDS	Montgomery	TX	77380	96-864-2079									HUNTSMAN CORPORATION - THE WOODLANDS CORPORATE SITE	10003 WOODLOCH FOREST DR.		THE WOODLANDS	MONTGOMERY	TX	77380	96-864-2079	100606419	110036000000	325199 All Other Basic Organic Chemical Manufacturing	Import					Import	CBI	CBI	CBI	CBI	CBI	CBI	100,000,000 ‚Äì <250,000,000	100,000,000 ‚Äì <250,000,000	100,000,000 ‚Äì <250,000,000	50,000,000 ‚Äì <100,000,000
1,2-Ethanediamine, N1-(2-aminoethyl)-	32.8731	-104.399	704418	111-40-0	111400	CASRN	CALFRAC WELL SERVICES CORP.	717 17TH STREET, STE 1445		DENVER	DENVER	CO	80202	13-109-1352									CALFRAC WELL SERVICES CORP - ARTESIA	2401 SIVLEY AVE		ARTESIA	EDDY COUNTY	NM	88210	13-109-1352	TSCA10054194	110071000000	213112 Support Activities For Oil And Gas Operations	Import					Import	0	8060	8060	0	0	0	100,000,000 ‚Äì <250,000,000	100,000,000 ‚Äì <250,000,000	100,000,000 ‚Äì <250,000,000	50,000,000 ‚Äì <100,000,000
1,2-Ethanediamine, N1-(2-aminoethyl)-	34.1024	-84.2408	738282	111-40-0	111400	CASRN	Tosoh Specialty Chemicals USA, Inc.	1720 Windward Concourse	Suite 125	Alpharetta	United States	GA	30005	80-981-0059									TOSOH SPECIALTY CHEMICALS	1720 WINDWARD CON	SUITE 125	ALPHARETTA	FORSYTH COUNTY	GA	30005	80-981-0059	TSCA118181	110057000000	424690 Other Chemical And Allied Products Merchant Wholesalers	Import					Import	CBI	CBI	CBI	CBI	CBI	CBI	100,000,000 ‚Äì <250,000,000	100,000,000 ‚Äì <250,000,000	100,000,000 ‚Äì <250,000,000	50,000,000 ‚Äì <100,000,000
1,2-Ethanediamine, N1-(2-aminoethyl)-	35.8627	-80.0763	731003	111-40-0	111400	CASRN	HARCROS CHEMICALS	5200 SPEAKER ROAD		KANSAS CITY	Wyandotte	KS	66106	08-016-6983									HARCROS CHEMICALS INC. - THOMASVILLE	125 SEDGEHILL DRIVE		THOMASVILLE	DAVIDSON	NC	27360-5732	04-141-4756	TSCA10057217	110008000000	424690 Other Chemical And Allied Products Merchant Wholesalers	Import					Import	0	98040	98040	104920	0	0	100,000,000 ‚Äì <250,000,000	100,000,000 ‚Äì <250,000,000	100,000,000 ‚Äì <250,000,000	50,000,000 ‚Äì <100,000,000
1,2-Ethanediamine, N1-(2-aminoethyl)-	39.076	-108.498	738376	111-40-0	111400	CASRN	CALFRAC WELL SERVICES CORP.	717 17TH STREET, STE 1445		DENVER	DENVER	CO	80202	13-109-1352									CALFRAC WELL SERVICES CORP	2996 TELLER CT		GRAND JUNCTION	MESA COUNTY	CO	81504	13-109-1352	TSCA8023	110043000000	213112 Support Activities For Oil And Gas Operations	Import									60905	28422	0	100,000,000 ‚Äì <250,000,000	100,000,000 ‚Äì <250,000,000	100,000,000 ‚Äì <250,000,000	50,000,000 ‚Äì <100,000,000
1,2-Ethanediamine, N1-(2-aminoethyl)-	40.7734	-74.4261	726464	111-40-0	111400	CASRN	BASF Corporation	100 Park Avenue		Florham Park	NJ	MI	7932	00-130-7032	BASF SE	Carl-Bosch Strasse 38		Ludwigshafen		60756	GM	31-500-0554	BASF IMPORTS PART 1	100 PARK AVE		FLORHAM PARK	MORRIS COUNTY	NJ	7932	00-130-7032	TSCA130148	110070000000	325199 All Other Basic Organic Chemical Manufacturing	Import					Import	CBI	CBI	CBI	CBI	CBI	CBI	100,000,000 ‚Äì <250,000,000	100,000,000 ‚Äì <250,000,000	100,000,000 ‚Äì <250,000,000	50,000,000 ‚Äì <100,000,000
1,2-Ethanediamine, N1-(2-aminoethyl)-	41.3596	-73.633	700337	111-40-0	111400	CASRN	NOURYON FUNCTIONAL CHEMICALS LLC	131 S. DEARBORN ST	SUITE 1000	CHICAGO	Cook	IL	60603	11-713-4378									NOURYON FUNCTIONAL CHEMICALS LLC	281 FIELDS LN.		BREWSTER	PUTNAM COUNTY	NY	10509	07-972-2077	TSCA5268	110060000000	325199 All Other Basic Organic Chemical Manufacturing	Import					Import	CBI	CBI	CBI	CBI	CBI	CBI	100,000,000 ‚Äì <250,000,000	100,000,000 ‚Äì <250,000,000	100,000,000 ‚Äì <250,000,000	50,000,000 ‚Äì <100,000,000
1,2-Ethanediamine, N1-(2-aminoethyl)-	41.8992	-80.7734	713673	111-40-0	111400	CASRN	GABRIEL PERFORMANCE	725 STATE RD		ASHTABULA	Ashtabula	OH	44004	02-715-5246									GABRIEL PERFORMANCE PRODUCTS LLC	725 STATE ROAD		ASHTABULA	ASHTABULA	OH	44004-3934	02-715-5246	TSCA4746	110000000000	325199 All Other Basic Organic Chemical Manufacturing	Manufacture					Manufacture	178305	0	178305	220087	268275	136517	100,000,000 ‚Äì <250,000,000	100,000,000 ‚Äì <250,000,000	100,000,000 ‚Äì <250,000,000	50,000,000 ‚Äì <100,000,000
1,2-Ethanediamine, N1-(2-aminoethyl)-	43.615	-84.1987	737940	111-40-0	111400	CASRN	The Dow Chemical Co	2211 H.H. Dow Way		Midland	Midland	MI	48674	08-036-1339									THE DOW CHEMICAL CO	2211 H.H. DOW WAY		MIDLAND	MIDLAND COUNTY	MI	48674	08-036-1339	TSCA10057799	110071000000	325199 All Other Basic Organic Chemical Manufacturing	Import	325211 Plastics Material And Resin Manufacturing	Import			Import	CBI	CBI	CBI	CBI	CBI	CBI	100,000,000 ‚Äì <250,000,000	100,000,000 ‚Äì <250,000,000	100,000,000 ‚Äì <250,000,000	50,000,000 ‚Äì <100,000,000
1,2-Ethanediamine, N1-(2-aminoethyl)-, hydrochloride (1:3)	39.8192	-75.2045	704732	4109-20-0	4109200	CASRN	Johnson Matthey Inc.	435 Devon Park Drive	Suite 600	Wayne	Radnor	PA	19087	00-232-6734									JOHNSON MATTHEY	2001 NOLTE DR.		WEST DEPTFORD	GLOUCESTER	NJ	8066	00-232-6734	100606641	110000000000	331410 Nonferrous Metal (Except Aluminum) Smelting And Refining	Both					Manufacture	51940	0	51940	64236	45433	48269	51940	64236	45433	48269
1,2-Ethanediamine, N1-(2-aminoethyl)-, polymer with aziridine	40.8126	-73.6637	721253	106899-94-9	106899949	CASRN	Aceto US, LLC	4 Tri Harbor Court		Port Washington	Nassau	NY	11050	11-704-8781									ACETO US, LLC	4 TRI HARBOR CT		PORT WASHINGTON	NASSAU COUNTY	NY	11050	11-704-8781	TSCA10047894	110071000000	424210 Drugs And Druggists' Sundries Merchant Wholesalers	Import					Import	CBI	CBI	CBI	0	0	0	<1,000,000	0	0	0
1,2-Ethanediamine, N1-(2-aminoethyl)-, reaction products with glycidyl p-tolyl ether	40.855	-74.4142	702014	68411-70-1	68411701	CASRN	Evonik Corporation	299 Jefferson Rd		Parsippany	Morris	NJ	7054	79-153-3958									EVONIK CORPORATION	299 JEFFERSON ROAD		PARSIPPANY	MORRIS COUNTY	NJ	7054	79-153-3958	100605812	110057000000	325998 All Other Miscellaneous Chemical Product And Preparation Manufacturing	Both									CBI	CBI	CBI	0	<1,000,000	<1,000,000	<1,000,000
1,2-Ethanediamine, N1-(2-aminoethyl)-N2-[2-[(2-aminoethyl)amino]ethyl]-	28.9663	-95.4194	737667	112-57-2	112572	CASRN	HUNTSMAN INTERNATIONAL LLC	10003 Woodloch Forest Dr		THE WOODLANDS	Montgomery	TX	77380	96-864-2079									HUNTSMAN ETHYLENEAMINES PLANT	307 COUNTY ROAD 624		FREEPORT	BRAZORIA	TX	77541	01-997-3705	100606420	110012000000	325199 All Other Basic Organic Chemical Manufacturing	Manufacture					Manufacture	CBI	0	CBI	CBI	CBI	CBI	10,000,000 ‚Äì <50,000,000	10,000,000 ‚Äì <50,000,000	10,000,000 ‚Äì <50,000,000	10,000,000 ‚Äì <50,000,000
1,2-Ethanediamine, N1-(2-aminoethyl)-N2-[2-[(2-aminoethyl)amino]ethyl]-	29.9843	-90.4551	734921	112-57-2	112572	CASRN	The Dow Chemical Co	2211 H.H. Dow Way		Midland	Midland	MI	48674	08-036-1339									UNION CARBIDE CORP - ST CHARLES OPERATIONS	HWY 3142 &AMP; 18		HAHNVILLE	SAINT CHARLES	LA	70057	80-103-8019	100608442	110001000000	325199 All Other Basic Organic Chemical Manufacturing	Manufacture	325211 Plastics Material And Resin Manufacturing	Manufacture			Manufacture	CBI	0	CBI	CBI	CBI	CBI	10,000,000 ‚Äì <50,000,000	10,000,000 ‚Äì <50,000,000	10,000,000 ‚Äì <50,000,000	10,000,000 ‚Äì <50,000,000
1,2-Ethanediamine, N1-(2-aminoethyl)-N2-[2-[(2-aminoethyl)amino]ethyl]-	30.1604	-95.4559	701433	112-57-2	112572	CASRN	HUNTSMAN INTERNATIONAL LLC	10003 Woodloch Forest Dr		THE WOODLANDS	Montgomery	TX	77380	96-864-2079									HUNTSMAN CORPORATION - THE WOODLANDS CORPORATE SITE	10003 WOODLOCH FOREST DR.		THE WOODLANDS	MONTGOMERY	TX	77380	96-864-2079	100606419	110036000000	325199 All Other Basic Organic Chemical Manufacturing	Import					Import	CBI	CBI	CBI	CBI	CBI	CBI	10,000,000 ‚Äì <50,000,000	10,000,000 ‚Äì <50,000,000	10,000,000 ‚Äì <50,000,000	10,000,000 ‚Äì <50,000,000
1,2-Ethanediamine, N1-(2-aminoethyl)-N2-[2-[(2-aminoethyl)amino]ethyl]-	34.1024	-84.2408	738285	112-57-2	112572	CASRN	Tosoh Specialty Chemicals USA, Inc.	1720 Windward Concourse	Suite 125	Alpharetta	United States	GA	30005	80-981-0059									TOSOH SPECIALTY CHEMICALS	1720 WINDWARD CON	SUITE 125	ALPHARETTA	FORSYTH COUNTY	GA	30005	80-981-0059	TSCA118181	110057000000	424690 Other Chemical And Allied Products Merchant Wholesalers	Import					Import	CBI	CBI	CBI	CBI	CBI	CBI	10,000,000 ‚Äì <50,000,000	10,000,000 ‚Äì <50,000,000	10,000,000 ‚Äì <50,000,000	10,000,000 ‚Äì <50,000,000
1,2-Ethanediamine, N1-(2-aminoethyl)-N2-[2-[(2-aminoethyl)amino]ethyl]-	40.855	-74.4142	701870	112-57-2	112572	CASRN	Evonik Corporation	299 Jefferson Rd		Parsippany	Morris	NJ	7054	79-153-3958									EVONIK CORPORATION	299 JEFFERSON ROAD		PARSIPPANY	MORRIS COUNTY	NJ	7054	79-153-3958	100605812	110057000000	325998 All Other Miscellaneous Chemical Product And Preparation Manufacturing	Both					Import	CBI	CBI	CBI	CBI	CBI	CBI	10,000,000 ‚Äì <50,000,000	10,000,000 ‚Äì <50,000,000	10,000,000 ‚Äì <50,000,000	10,000,000 ‚Äì <50,000,000
1,2-Ethanediamine, N1-(2-aminoethyl)-N2-[2-[(2-aminoethyl)amino]ethyl]-	43.615	-84.1987	737949	112-57-2	112572	CASRN	The Dow Chemical Co	2211 H.H. Dow Way		Midland	Midland	MI	48674	08-036-1339									THE DOW CHEMICAL CO	2211 H.H. DOW WAY		MIDLAND	MIDLAND COUNTY	MI	48674	08-036-1339	TSCA10057799	110071000000	325199 All Other Basic Organic Chemical Manufacturing	Import	325211 Plastics Material And Resin Manufacturing	Import			Import	CBI	CBI	CBI	CBI	CBI	CBI	10,000,000 ‚Äì <50,000,000	10,000,000 ‚Äì <50,000,000	10,000,000 ‚Äì <50,000,000	10,000,000 ‚Äì <50,000,000
1,2-Ethanediamine, N1-(2-aminoethyl)-N2-[3-(trimethoxysilyl)propyl]-	40.855	-74.4142	701962	35141-30-1	35141301	CASRN	Evonik Corporation	299 Jefferson Rd		Parsippany	Morris	NJ	7054	79-153-3958									EVONIK CORPORATION	299 JEFFERSON ROAD		PARSIPPANY	MORRIS COUNTY	NJ	7054	79-153-3958	100605812	110057000000	325998 All Other Miscellaneous Chemical Product And Preparation Manufacturing	Both					Import	CBI	CBI	CBI	CBI	CBI	CBI	<1,000,000	<1,000,000	<1,000,000	<1,000,000
1,2-Ethanediamine, N1-(phenylmethyl)-N2-[3-(trimethoxysilyl)propyl]-, hydrochloride (1:1)	40.855	-74.4142	701970	42965-91-3	42965913	CASRN	Evonik Corporation	299 Jefferson Rd		Parsippany	Morris	NJ	7054	79-153-3958									EVONIK CORPORATION	299 JEFFERSON ROAD		PARSIPPANY	MORRIS COUNTY	NJ	7054	79-153-3958	100605812	110057000000	325998 All Other Miscellaneous Chemical Product And Preparation Manufacturing	Both					Import	CBI	CBI	CBI	CBI	CBI	CBI	<1,000,000	<1,000,000	<1,000,000	<1,000,000
1,2-Ethanediamine, N1-[2-(dimethylamino)ethyl]-N1,N2,N2-trimethyl-	29.7131	-95.1946	705988	3030-47-5	3030475	CASRN	Evonik Corporation	299 Jefferson Rd		Parsippany	Morris	NJ	7054	79-153-3958									EVONIK CORPORATION	1423 PASADENA FWY		PASADENA	HARRIS COUNTY	TX	77506	06-509-1969	TSCA10055615	110071000000	325199 All Other Basic Organic Chemical Manufacturing						Manufacture	CBI	0	CBI	CBI	CBI	CBI	1,000,000 ‚Äì <20,000,000	1,000,000 ‚Äì <20,000,000	1,000,000 ‚Äì <20,000,000	1,000,000 ‚Äì <20,000,000
1,2-Ethanediamine, N1-[2-(dimethylamino)ethyl]-N1,N2,N2-trimethyl-	30.1604	-95.4559	701484	3030-47-5	3030475	CASRN	HUNTSMAN INTERNATIONAL LLC	10003 Woodloch Forest Dr		THE WOODLANDS	Montgomery	TX	77380	96-864-2079									HUNTSMAN CORPORATION - THE WOODLANDS CORPORATE SITE	10003 WOODLOCH FOREST DR.		THE WOODLANDS	MONTGOMERY	TX	77380	96-864-2079	100606419	110036000000	325199 All Other Basic Organic Chemical Manufacturing	Import					Import	CBI	CBI	CBI	CBI	CBI	CBI	1,000,000 ‚Äì <20,000,000	1,000,000 ‚Äì <20,000,000	1,000,000 ‚Äì <20,000,000	1,000,000 ‚Äì <20,000,000
1,2-Ethanediamine, N1-[2-(dimethylamino)ethyl]-N1,N2,N2-trimethyl-	34.1024	-84.2408	738290	3030-47-5	3030475	CASRN	Tosoh Specialty Chemicals USA, Inc.	1720 Windward Concourse	Suite 125	Alpharetta	United States	GA	30005	80-981-0059									TOSOH SPECIALTY CHEMICALS	1720 WINDWARD CON	SUITE 125	ALPHARETTA	FORSYTH COUNTY	GA	30005	80-981-0059	TSCA118181	110057000000	424690 Other Chemical And Allied Products Merchant Wholesalers	Import					Import	CBI	CBI	CBI	CBI	CBI	CBI	1,000,000 ‚Äì <20,000,000	1,000,000 ‚Äì <20,000,000	1,000,000 ‚Äì <20,000,000	1,000,000 ‚Äì <20,000,000
1,2-Ethanediamine, N1-[2-(dimethylamino)ethyl]-N1,N2,N2-trimethyl-	37.5742	-97.4261	736521	3030-47-5	3030475	CASRN	Evonik Corporation	299 Jefferson Road		Parsippany	Morris	NJ	7054	79-153-3958									EVONIK CORPORATION	6601 SOUTH RIDGE ROAD		HAYSVILLE	SEDGWICK COUNTY	KS	67060-7134	08-053-8784	TSCA9574	110000000000	325199 All Other Basic Organic Chemical Manufacturing						Manufacture	CBI	0	CBI	CBI	CBI	CBI	1,000,000 ‚Äì <20,000,000	1,000,000 ‚Äì <20,000,000	1,000,000 ‚Äì <20,000,000	1,000,000 ‚Äì <20,000,000
1,2-Ethanediamine, N1-[2-(dimethylamino)ethyl]-N1,N2,N2-trimethyl-	40.3143	-74.6523	740906	3030-47-5	3030475	CASRN	Solvay Holding Inc	504 Carnegie Center		Princeton	Mercer	NJ	8540	87-474-8937	SOLVAY S A	RUE DE RANSBEEK, 310	1120 Brussels	Brussels			BE	37-000-9086	SOLVAY USA INC	504 CARNEGIE CTR		PRINCETON	MERCER COUNTY	NJ	8540	00-295-9810	TSCA123682	110070000000	325199 All Other Basic Organic Chemical Manufacturing	Withheld					CBI	CBI	CBI	CBI	CBI	CBI	CBI	1,000,000 ‚Äì <20,000,000	1,000,000 ‚Äì <20,000,000	1,000,000 ‚Äì <20,000,000	1,000,000 ‚Äì <20,000,000
1,2-Ethanediamine, N1-[2-(dimethylamino)ethyl]-N1,N2,N2-trimethyl-	40.855	-74.4142	701954	3030-47-5	3030475	CASRN	Evonik Corporation	299 Jefferson Rd		Parsippany	Morris	NJ	7054	79-153-3958									EVONIK CORPORATION	299 JEFFERSON ROAD		PARSIPPANY	MORRIS COUNTY	NJ	7054	79-153-3958	100605812	110057000000	325998 All Other Miscellaneous Chemical Product And Preparation Manufacturing	Both					Import	CBI	CBI	CBI	CBI	CBI	CBI	1,000,000 ‚Äì <20,000,000	1,000,000 ‚Äì <20,000,000	1,000,000 ‚Äì <20,000,000	1,000,000 ‚Äì <20,000,000
1,2-Ethanediamine, N1-[3-(dimethoxymethylsilyl)propyl]-	34.9873	-80.5565	712797	3069-29-2	3069292	CASRN	GOULSTON TECHNOLOGIES	PO BOX 5025		MONROE	Union	NC	28111-5025	00-104-7786									GOULSTON TECHNOLOGIES	700 NORTH JOHNSON STREET		MONROE	UNION COUNTY	NC	28110-2650	00-104-7786	100602123	110000000000	325998 All Other Miscellaneous Chemical Product And Preparation Manufacturing	Both					Import	0	48251	48251	52819	60001	54961	<1,000,000	<1,000,000	<1,000,000	<1,000,000
[truncated: 35,528 more rows]
[truncated: 27 more columns]

## Sheet: T2. EPA TRI Waste Data
TRI Facility Name	TRI Facility ID	Year	ZIP Code	City	State	Latitude	Longitude	Chemical	Industry Sector	NAICS Code	Releases (lb)	Air Releases (lb)	Water Releases (lb)	Land Releases (lb)	Off-Site Releases (lb)	Waste Managed (lb)	RSEI Hazard	Number of Source Reduction Activities
[truncated: 78,304 more rows]

## Sheet: T3. Imports - Trade Shift Comp.
U.S. imports by sector, digest, and HTS8 subheading, 2015-2019 ($)
[truncated: 11,501 more rows]

[truncated: 34 more sheets: T4. Exports - Trade Shift Comp., T5. BEA IOUse Data - FC Values, T6. Imports to APAP, T7. Exports and FC from APAP, T8. Production Facility Data, T9. Prod. Facility Centroids, T10. Disposal Facility Data, T11. Transportation Distance, T12. ByPASS Economics Data, T13. Base Op Loss (Lambda Base), T14. Sectoral Intensity (Kappa), T15. ByPASS Calculations, T16. Partial PUT Model D (Ind), T17. Partial PST Model D (Ind), T18. Complete PUT Model D (Ind), T19. Complete PST Model D (Ind), T20. PIOT Model D (Ind), T21. Partial PUT ByPASS (Ind), T22. Partial PST ByPASS (Ind), T23. Complete PUT ByPASS (Ind) …]
